# Supplementary material for: α-/γ-Taxilin are required for centriolar subdistal appendage assembly and microtubule organization
Source: eLife journal article supplement (doi:10.7554/elife.73252), 2022-01-19
Supplement: fig1-figsupp1-data2 [file MDD_20180126_68_C _APEX2_SilverStain.xlsx]

## Sheet: Proteins
Checked	Protein FDR Confidence	Master	Accession	Description	Exp. q-value	Sum PEP Score	Coverage	# Peptides	# PSMs	# Unique Peptides	# Protein Groups	# AAs	MW [kDa]	calc. pI	# PSMs A2 Sequest HT	# PSMs B2 Sequest HT	# Peptides A2 Sequest HT	# Peptides B2 Sequest HT
FALSE	High	Master Protein	Q9HB71	Calcyclin-binding protein OS=Homo sapiens GN=CACYBP PE=1 SV=2	0	79.6293	62.2807	15	21	15	1	228	26.194	8.25		21		15
FALSE	High	Master Protein	O75832	26S proteasome non-ATPase regulatory subunit 10 OS=Homo sapiens GN=PSMD10 PE=1 SV=1	0	29.8209	61.0619	11	11	11	1	226	24.412	6.1		11		11
FALSE	High	Master Protein	Q15691	Microtubule-associated protein RP/EB family member 1 OS=Homo sapiens GN=MAPRE1 PE=1 SV=3	0	88.6553	54.8507	15	27	13	1	268	29.98	5.14		27		15
FALSE	High	Master Protein	P55072	Transitional endoplasmic reticulum ATPase OS=Homo sapiens GN=VCP PE=1 SV=4	0	188.139	51.4888	41	102	41	1	806	89.266	5.26		102		41
FALSE	High	Master Protein	P37802	Transgelin-2 OS=Homo sapiens GN=TAGLN2 PE=1 SV=3	0	47.9267	51.2563	11	24	11	1	199	22.377	8.25		24		11
FALSE	High	Master Protein	O75556	Mammaglobin-B OS=Homo sapiens GN=SCGB2A1 PE=1 SV=1	0	13.5385	49.4737	4	4	4	1	95	10.876	5.78		4		4
FALSE	High	Master Protein	O00151	PDZ and LIM domain protein 1 OS=Homo sapiens GN=PDLIM1 PE=1 SV=4	0	56.2084	49.2401	11	23	11	1	329	36.049	7.02		23		11
FALSE	High	Master Protein	P50995	Annexin A11 OS=Homo sapiens GN=ANXA11 PE=1 SV=1	0	124.667	49.1089	29	55	29	1	505	54.355	7.65		55		29
FALSE	High	Master Protein	Q9Y3F4	Serine-threonine kinase receptor-associated protein OS=Homo sapiens GN=STRAP PE=1 SV=1	0	45.1954	47.1429	12	14	12	1	350	38.414	5.12		14		12
FALSE	High	Master Protein	P21266	Glutathione S-transferase Mu 3 OS=Homo sapiens GN=GSTM3 PE=1 SV=3	0	28.5188	46.2222	10	10	10	1	225	26.542	5.54		10		10
FALSE	High	Master Protein	P50395	Rab GDP dissociation inhibitor beta OS=Homo sapiens GN=GDI2 PE=1 SV=2	0	58.7426	46.0674	16	21	12	1	445	50.631	6.47		21		16
FALSE	High	Master Protein	Q02790	Peptidyl-prolyl cis-trans isomerase FKBP4 OS=Homo sapiens GN=FKBP4 PE=1 SV=3	0	55.0529	45.9695	18	27	18	1	459	51.772	5.43		27		18
FALSE	High	Master Protein	Q9Y2Z0	Protein SGT1 homolog OS=Homo sapiens GN=SUGT1 PE=1 SV=3	0	48.0672	45.7534	13	24	13	1	365	40.998	5.16		24		13
FALSE	High	Master Protein	P08133	Annexin A6 OS=Homo sapiens GN=ANXA6 PE=1 SV=3	0	96.2074	44.5765	27	54	27	1	673	75.826	5.6		54		27
FALSE	High	Master Protein	P46926	Glucosamine-6-phosphate isomerase 1 OS=Homo sapiens GN=GNPDA1 PE=1 SV=1	0	28.2262	44.2907	9	10	9	1	289	32.648	6.92		10		9
FALSE	High	Master Protein	Q9Y265	RuvB-like 1 OS=Homo sapiens GN=RUVBL1 PE=1 SV=1	0	57.7344	43.8596	15	17	15	1	456	50.196	6.42		17		15
FALSE	High	Master Protein	P20073	Annexin A7 OS=Homo sapiens GN=ANXA7 PE=1 SV=3	0	105.319	43.2377	23	50	23	1	488	52.706	5.68		50		23
FALSE	High	Master Protein	Q15417	Calponin-3 OS=Homo sapiens GN=CNN3 PE=1 SV=1	0	46.9126	42.8571	11	26	10	1	329	36.391	6.05		26		11
FALSE	High	Master Protein	P09936	Ubiquitin carboxyl-terminal hydrolase isozyme L1 OS=Homo sapiens GN=UCHL1 PE=1 SV=2	0	19.5611	42.6009	7	8	7	1	223	24.808	5.48		8		7
FALSE	High	Master Protein	P47756	F-actin-capping protein subunit beta OS=Homo sapiens GN=CAPZB PE=1 SV=4	0	37.2041	42.2383	10	11	10	1	277	31.331	5.59		11		10
FALSE	High	Master Protein	P61978	Heterogeneous nuclear ribonucleoprotein K OS=Homo sapiens GN=HNRNPK PE=1 SV=1	0	62.8524	39.3089	16	28	16	1	463	50.944	5.54		28		16
FALSE	High	Master Protein	P54105	Methylosome subunit pICln OS=Homo sapiens GN=CLNS1A PE=1 SV=1	0	17.5993	37.1308	5	5	5	1	237	26.199	4.11		5		5
FALSE	High	Master Protein	Q14847	LIM and SH3 domain protein 1 OS=Homo sapiens GN=LASP1 PE=1 SV=2	0	28.364	36.3985	9	13	9	1	261	29.698	7.05		13		9
FALSE	High	Master Protein	Q9H2F9	Coiled-coil domain-containing protein 68 OS=Homo sapiens GN=CCDC68 PE=1 SV=1	0	69.1912	36.1194	14	29	14	1	335	38.845	8.65		29		14
FALSE	High	Master Protein	Q99426	Tubulin-folding cofactor B OS=Homo sapiens GN=TBCB PE=1 SV=2	0	30.4291	36.0656	8	10	8	1	244	27.308	5.15		10		8
FALSE	High	Master Protein	O95336	6-phosphogluconolactonase OS=Homo sapiens GN=PGLS PE=1 SV=2	0	16.3526	36.0465	6	6	6	1	258	27.53	6.05		6		6
FALSE	High	Master Protein	P18206	Vinculin OS=Homo sapiens GN=VCL PE=1 SV=4	0	117.382	35.9788	36	52	36	1	1134	123.722	5.66		52		36
FALSE	High	Master Protein	Q9Y262	Eukaryotic translation initiation factor 3 subunit L OS=Homo sapiens GN=EIF3L PE=1 SV=1	0	77.6901	34.3972	20	24	20	1	564	66.684	6.34		24		20
FALSE	High	Master Protein	Q9UKK9	ADP-sugar pyrophosphatase OS=Homo sapiens GN=NUDT5 PE=1 SV=1	0	22.0932	33.3333	7	8	7	1	219	24.312	4.94		8		7
FALSE	High	Master Protein	P43487	Ran-specific GTPase-activating protein OS=Homo sapiens GN=RANBP1 PE=1 SV=1	0	15.2173	33.3333	5	5	5	1	201	23.296	5.29		5		5
FALSE	High	Master Protein	Q99832	T-complex protein 1 subunit eta OS=Homo sapiens GN=CCT7 PE=1 SV=2	0	45.3587	32.965	14	15	14	1	543	59.329	7.65		15		14
FALSE	High	Master Protein	P22234	Multifunctional protein ADE2 OS=Homo sapiens GN=PAICS PE=1 SV=3	0	45.7237	32.4706	13	15	13	1	425	47.049	7.23		15		13
FALSE	High	Master Protein	Q9UNZ2	NSFL1 cofactor p47 OS=Homo sapiens GN=NSFL1C PE=1 SV=2	0	24.129	32.1622	8	10	8	1	370	40.548	5.1		10		8
FALSE	High	Master Protein	P29692	Elongation factor 1-delta OS=Homo sapiens GN=EEF1D PE=1 SV=5	0	22.827	31.3167	6	8	6	1	281	31.103	5.01		8		6
FALSE	High	Master Protein	Q92734	Protein TFG OS=Homo sapiens GN=TFG PE=1 SV=2	0	29.0529	30.5	7	15	7	1	400	43.421	5.1		15		7
FALSE	High	Master Protein	P31948	Stress-induced-phosphoprotein 1 OS=Homo sapiens GN=STIP1 PE=1 SV=1	0	46.5974	30.3867	16	18	16	1	543	62.599	6.8		18		16
FALSE	High	Master Protein	P18669	Phosphoglycerate mutase 1 OS=Homo sapiens GN=PGAM1 PE=1 SV=2	0	20.5755	30.315	5	6	5	1	254	28.786	7.18		6		5
FALSE	High	Master Protein	P50502	Hsc70-interacting protein OS=Homo sapiens GN=ST13 PE=1 SV=2	0	57.5619	30.0813	13	24	13	1	369	41.305	5.27		24		13
FALSE	High	Master Protein	Q13561	Dynactin subunit 2 OS=Homo sapiens GN=DCTN2 PE=1 SV=4	0	23.3649	28.6783	7	8	7	1	401	44.204	5.21		8		7
FALSE	High	Master Protein	P55036	26S proteasome non-ATPase regulatory subunit 4 OS=Homo sapiens GN=PSMD4 PE=1 SV=1	0	29.2741	28.6472	9	10	9	1	377	40.711	4.79		10		9
FALSE	High	Master Protein	Q96CX2	BTB/POZ domain-containing protein KCTD12 OS=Homo sapiens GN=KCTD12 PE=1 SV=1	0	20.64	28.3077	8	14	8	1	325	35.679	5.64		14		8
FALSE	High	Master Protein	Q9BYB4	Guanine nucleotide-binding protein subunit beta-like protein 1 OS=Homo sapiens GN=GNB1L PE=1 SV=2	0	19.2874	28.1346	6	8	6	1	327	35.595	7.97		8		6
FALSE	High	Master Protein	Q9UNF0	Protein kinase C and casein kinase substrate in neurons protein 2 OS=Homo sapiens GN=PACSIN2 PE=1 SV=2	0	33.359	27.7778	12	13	12	1	486	55.704	5.2		13		12
FALSE	High	Master Protein	O95721	Synaptosomal-associated protein 29 OS=Homo sapiens GN=SNAP29 PE=1 SV=1	0	15.3615	27.5194	6	6	6	1	258	28.953	5.81		6		6
FALSE	High	Master Protein	Q16555	Dihydropyrimidinase-related protein 2 OS=Homo sapiens GN=DPYSL2 PE=1 SV=1	0	36.7838	26.9231	11	16	8	1	572	62.255	6.38		16		11
FALSE	High	Master Protein	P54577	Tyrosine--tRNA ligase, cytoplasmic OS=Homo sapiens GN=YARS PE=1 SV=4	0	39.27	26.8939	16	18	16	1	528	59.106	7.05		18		16
FALSE	High	Master Protein	P13693	Translationally-controlled tumor protein OS=Homo sapiens GN=TPT1 PE=1 SV=1	0	10.503	26.7442	4	5	4	1	172	19.583	4.93		5		4
FALSE	High	Master Protein	P61586	Transforming protein RhoA OS=Homo sapiens GN=RHOA PE=1 SV=1	0	17.7281	26.4249	5	5	3	1	193	21.754	6.1		5		5
FALSE	High	Master Protein	P62140	Serine/threonine-protein phosphatase PP1-beta catalytic subunit OS=Homo sapiens GN=PPP1CB PE=1 SV=3	0	22.0758	25.6881	6	8	2	1	327	37.163	6.19		8		6
FALSE	High	Master Protein	O95861	3'(2'),5'-bisphosphate nucleotidase 1 OS=Homo sapiens GN=BPNT1 PE=1 SV=1	0	20.1918	25.6494	7	7	7	1	308	33.371	5.69		7		7
FALSE	High	Master Protein	Q9UHD1	Cysteine and histidine-rich domain-containing protein 1 OS=Homo sapiens GN=CHORDC1 PE=1 SV=2	0	21.7943	25.6024	5	7	5	1	332	37.466	7.87		7		5
FALSE	High	Master Protein	Q99873	Protein arginine N-methyltransferase 1 OS=Homo sapiens GN=PRMT1 PE=1 SV=2	0	30.2285	25.4848	7	10	7	1	361	41.489	5.43		10		7
FALSE	High	Master Protein	Q9BSH4	Translational activator of cytochrome c oxidase 1 OS=Homo sapiens GN=TACO1 PE=1 SV=1	0	27.2933	24.9158	6	7	6	1	297	32.457	8.13		7		6
FALSE	High	Master Protein	O43707	Alpha-actinin-4 OS=Homo sapiens GN=ACTN4 PE=1 SV=2	0	63.219	24.8079	20	31	13	1	911	104.788	5.44		31		20
FALSE	High	Master Protein	P00367	Glutamate dehydrogenase 1, mitochondrial OS=Homo sapiens GN=GLUD1 PE=1 SV=2	0	27.5972	24.552	9	10	9	1	558	61.359	7.8		10		9
FALSE	High	Master Protein	P07741	Adenine phosphoribosyltransferase OS=Homo sapiens GN=APRT PE=1 SV=2	0	14.8274	24.4444	4	6	4	1	180	19.595	6.02		6		4
FALSE	High	Master Protein	Q99497	Protein deglycase DJ-1 OS=Homo sapiens GN=PARK7 PE=1 SV=2	0	12.0378	24.3386	4	5	4	1	189	19.878	6.79		5		4
FALSE	High	Master Protein	P09417	Dihydropteridine reductase OS=Homo sapiens GN=QDPR PE=1 SV=2	0	11.0573	24.1803	4	4	4	1	244	25.773	7.37		4		4
FALSE	High	Master Protein	Q9Y266	Nuclear migration protein nudC OS=Homo sapiens GN=NUDC PE=1 SV=1	0	15.7443	24.1692	6	7	6	1	331	38.219	5.38		7		6
FALSE	High	Master Protein	O60506	Heterogeneous nuclear ribonucleoprotein Q OS=Homo sapiens GN=SYNCRIP PE=1 SV=2	0	42.5569	23.9165	14	15	14	1	623	69.56	8.59		15		14
FALSE	High	Master Protein	P48444	Coatomer subunit delta OS=Homo sapiens GN=ARCN1 PE=1 SV=1	0	31.5461	23.8748	12	13	12	1	511	57.174	6.21		13		12
FALSE	High	Master Protein	Q9H910	Hematological and neurological expressed 1-like protein OS=Homo sapiens GN=HN1L PE=1 SV=1	0	7.99561	23.6842	3	3	3	1	190	20.051	9.26		3		3
FALSE	High	Master Protein	Q99439	Calponin-2 OS=Homo sapiens GN=CNN2 PE=1 SV=4	0	14.7632	23.6246	6	8	5	1	309	33.675	7.33		8		6
FALSE	High	Master Protein	Q9UJU6	Drebrin-like protein OS=Homo sapiens GN=DBNL PE=1 SV=1	0	24.91	23.4884	8	12	8	1	430	48.178	5.05		12		8
FALSE	High	Master Protein	O95968	Secretoglobin family 1D member 1 OS=Homo sapiens GN=SCGB1D1 PE=1 SV=1	0	12.4368	23.3333	4	5	4	1	90	9.891	9.25		5		4
FALSE	High	Master Protein	Q9Y5M8	Signal recognition particle receptor subunit beta OS=Homo sapiens GN=SRPRB PE=1 SV=3	0	14.9137	23.2472	4	4	4	1	271	29.684	9.04		4		4
FALSE	High	Master Protein	O43760	Synaptogyrin-2 OS=Homo sapiens GN=SYNGR2 PE=1 SV=1	0	14.1094	23.2143	5	7	5	1	224	24.794	4.94		7		5
FALSE	High	Master Protein	Q6FI81	Anamorsin OS=Homo sapiens GN=CIAPIN1 PE=1 SV=2	0	24.8515	23.0769	7	8	7	1	312	33.561	5.62		8		7
FALSE	High	Master Protein	O60664	Perilipin-3 OS=Homo sapiens GN=PLIN3 PE=1 SV=3	0	20.0955	23.0415	7	8	7	1	434	47.046	5.44		8		7
FALSE	High	Master Protein	P26599	Polypyrimidine tract-binding protein 1 OS=Homo sapiens GN=PTBP1 PE=1 SV=1	0	37.5896	22.9755	9	11	7	1	531	57.186	9.17		11		9
FALSE	High	Master Protein	Q9NZL4	Hsp70-binding protein 1 OS=Homo sapiens GN=HSPBP1 PE=1 SV=1	0	19.0481	22.9282	6	6	6	1	362	39.449	5.21		6		6
FALSE	High	Master Protein	Q6YP21	Kynurenine--oxoglutarate transaminase 3 OS=Homo sapiens GN=CCBL2 PE=1 SV=1	0	29.712	22.9075	9	10	9	1	454	51.368	8.19		10		9
FALSE	High	Master Protein	P46060	Ran GTPase-activating protein 1 OS=Homo sapiens GN=RANGAP1 PE=1 SV=1	0	30.9487	22.8279	11	14	11	1	587	63.502	4.68		14		11
FALSE	High	Master Protein	P15374	Ubiquitin carboxyl-terminal hydrolase isozyme L3 OS=Homo sapiens GN=UCHL3 PE=1 SV=1	0	15.9521	22.6087	4	4	4	1	230	26.166	4.92		4		4
FALSE	High	Master Protein	Q969T9	WW domain-binding protein 2 OS=Homo sapiens GN=WBP2 PE=1 SV=1	0	20.727	22.6054	5	12	5	1	261	28.068	5.91		12		5
FALSE	High	Master Protein	P49247	Ribose-5-phosphate isomerase OS=Homo sapiens GN=RPIA PE=1 SV=3	0	21.8528	22.508	5	5	5	1	311	33.248	8.54		5		5
FALSE	High	Master Protein	O75663	TIP41-like protein OS=Homo sapiens GN=TIPRL PE=1 SV=2	0	18.1642	22.4265	6	7	6	1	272	31.424	5.91		7		6
FALSE	High	Master Protein	P16152	Carbonyl reductase [NADPH] 1 OS=Homo sapiens GN=CBR1 PE=1 SV=3	0	11.2487	22.3827	5	5	5	1	277	30.356	8.32		5		5
FALSE	High	Master Protein	Q9Y508	E3 ubiquitin-protein ligase RNF114 OS=Homo sapiens GN=RNF114 PE=1 SV=1	0	9.43237	22.3684	4	4	4	1	228	25.677	7.25		4		4
FALSE	High	Master Protein	P36873	Serine/threonine-protein phosphatase PP1-gamma catalytic subunit OS=Homo sapiens GN=PPP1CC PE=1 SV=1	0	19.5832	22.291	5	7	1	1	323	36.96	6.54		7		5
FALSE	High	Master Protein	Q13126	S-methyl-5'-thioadenosine phosphorylase OS=Homo sapiens GN=MTAP PE=1 SV=2	0	21.8739	22.2615	5	5	5	1	283	31.216	7.18		5		5
FALSE	High	Master Protein	Q15056	Eukaryotic translation initiation factor 4H OS=Homo sapiens GN=EIF4H PE=1 SV=5	0	15.1172	22.1774	5	6	5	1	248	27.368	7.23		6		5
FALSE	High	Master Protein	P15311	Ezrin OS=Homo sapiens GN=EZR PE=1 SV=4	0	46.8561	21.843	15	18	15	1	586	69.37	6.27		18		15
FALSE	High	Master Protein	O95801	Tetratricopeptide repeat protein 4 OS=Homo sapiens GN=TTC4 PE=1 SV=3	0	25.8388	21.7054	7	9	7	1	387	44.65	5.6		9		7
FALSE	High	Master Protein	Q15942	Zyxin OS=Homo sapiens GN=ZYX PE=1 SV=1	0	19.751	21.6783	8	12	8	1	572	61.238	6.67		12		8
FALSE	High	Master Protein	Q8N684	Cleavage and polyadenylation specificity factor subunit 7 OS=Homo sapiens GN=CPSF7 PE=1 SV=1	0	24.5457	21.6561	8	10	8	1	471	52.018	8		10		8
FALSE	High	Master Protein	Q9HD26	Golgi-associated PDZ and coiled-coil motif-containing protein OS=Homo sapiens GN=GOPC PE=1 SV=1	0	29.5489	21.4286	11	12	11	1	462	50.489	5.92		12		11
FALSE	High	Master Protein	Q15599	Na(+)/H(+) exchange regulatory cofactor NHE-RF2 OS=Homo sapiens GN=SLC9A3R2 PE=1 SV=2	0	15.9696	21.365	5	8	5	1	337	37.391	7.93		8		5
FALSE	High	Master Protein	Q96I24	Far upstream element-binding protein 3 OS=Homo sapiens GN=FUBP3 PE=1 SV=2	0	30.9621	21.1538	9	13	7	1	572	61.602	8.38		13		9
FALSE	High	Master Protein	Q16576	Histone-binding protein RBBP7 OS=Homo sapiens GN=RBBP7 PE=1 SV=1	0	18.4693	20.9412	6	7	6	1	425	47.79	5.05		7		6
FALSE	High	Master Protein	Q16543	Hsp90 co-chaperone Cdc37 OS=Homo sapiens GN=CDC37 PE=1 SV=1	0	21.6703	20.8995	6	7	6	1	378	44.44	5.25		7		6
FALSE	High	Master Protein	Q99816	Tumor susceptibility gene 101 protein OS=Homo sapiens GN=TSG101 PE=1 SV=2	0	16.4957	20.7692	6	6	6	1	390	43.916	6.46		6		6
FALSE	High	Master Protein	Q14353	Guanidinoacetate N-methyltransferase OS=Homo sapiens GN=GAMT PE=1 SV=1	0	8.53244	20.7627	3	3	3	1	236	26.301	6.14		3		3
FALSE	High	Master Protein	P00558	Phosphoglycerate kinase 1 OS=Homo sapiens GN=PGK1 PE=1 SV=3	0	23.3475	20.6235	6	7	6	1	417	44.586	8.1		7		6
FALSE	High	Master Protein	O75534	Cold shock domain-containing protein E1 OS=Homo sapiens GN=CSDE1 PE=1 SV=2	0	50.9215	20.3008	17	24	17	1	798	88.829	6.25		24		17
FALSE	High	Master Protein	Q13155	Aminoacyl tRNA synthase complex-interacting multifunctional protein 2 OS=Homo sapiens GN=AIMP2 PE=1 SV=2	0	13.6924	20	4	6	4	1	320	35.326	8.22		6		4
FALSE	High	Master Protein	Q9BSD7	Cancer-related nucleoside-triphosphatase OS=Homo sapiens GN=NTPCR PE=1 SV=1	0	8.61285	20	3	3	3	1	190	20.7	9.54		3		3
FALSE	High	Master Protein	Q9HC38	Glyoxalase domain-containing protein 4 OS=Homo sapiens GN=GLOD4 PE=1 SV=1	0	19.5213	19.8083	7	7	7	1	313	34.771	5.6		7		7
FALSE	High	Master Protein	Q13283	Ras GTPase-activating protein-binding protein 1 OS=Homo sapiens GN=G3BP1 PE=1 SV=1	0	24.948	19.7425	7	8	7	1	466	52.132	5.52		8		7
FALSE	High	Master Protein	Q16204	Coiled-coil domain-containing protein 6 OS=Homo sapiens GN=CCDC6 PE=1 SV=2	0	27.0118	19.6203	9	9	9	1	474	53.258	7.34		9		9
FALSE	High	Master Protein	P30626	Sorcin OS=Homo sapiens GN=SRI PE=1 SV=1	0	9.38154	19.1919	3	3	3	1	198	21.662	5.59		3		3
FALSE	High	Master Protein	P08670	Vimentin OS=Homo sapiens GN=VIM PE=1 SV=4	0	19.0149	19.0987	7	7	7	1	466	53.619	5.12		7		7
FALSE	High	Master Protein	Q06210	Glutamine--fructose-6-phosphate aminotransferase [isomerizing] 1 OS=Homo sapiens GN=GFPT1 PE=1 SV=3	0	27.8107	19.0272	11	14	8	1	699	78.756	7.11		14		11
FALSE	High	Master Protein	P35219	Carbonic anhydrase-related protein OS=Homo sapiens GN=CA8 PE=1 SV=3	0	12.6244	18.9655	4	5	4	1	290	32.953	4.86		5		4
FALSE	High	Master Protein	Q9Y314	Nitric oxide synthase-interacting protein OS=Homo sapiens GN=NOSIP PE=1 SV=1	0	11.9446	18.9369	4	4	4	1	301	33.151	8.82		4		4
FALSE	High	Master Protein	Q06124	Tyrosine-protein phosphatase non-receptor type 11 OS=Homo sapiens GN=PTPN11 PE=1 SV=2	0	31.7774	18.928	11	20	11	1	597	68.393	7.3		20		11
FALSE	High	Master Protein	Q15654	Thyroid receptor-interacting protein 6 OS=Homo sapiens GN=TRIP6 PE=1 SV=3	0	17.8006	18.9076	7	8	7	1	476	50.255	7.37		8		7
FALSE	High	Master Protein	Q8N1G4	Leucine-rich repeat-containing protein 47 OS=Homo sapiens GN=LRRC47 PE=1 SV=1	0	28.2415	18.8679	9	9	9	1	583	63.434	8.28		9		9
FALSE	High	Master Protein	O95831	Apoptosis-inducing factor 1, mitochondrial OS=Homo sapiens GN=AIFM1 PE=1 SV=1	0	26.919	18.7602	9	10	9	1	613	66.859	8.95		10		9
FALSE	High	Master Protein	Q8NEZ5	F-box only protein 22 OS=Homo sapiens GN=FBXO22 PE=1 SV=1	0	15.345	18.6104	6	6	6	1	403	44.48	7.03		6		6
FALSE	High	Master Protein	Q9NP79	Vacuolar protein sorting-associated protein VTA1 homolog OS=Homo sapiens GN=VTA1 PE=1 SV=1	0	19.681	18.5668	5	9	5	1	307	33.858	6.29		9		5
FALSE	High	Master Protein	Q15029	116 kDa U5 small nuclear ribonucleoprotein component OS=Homo sapiens GN=EFTUD2 PE=1 SV=1	0	37.5835	18.4156	14	18	13	1	972	109.366	5		18		14
FALSE	High	Master Protein	P52888	Thimet oligopeptidase OS=Homo sapiens GN=THOP1 PE=1 SV=2	0	25.2429	18.2874	10	10	10	1	689	78.789	6.05		10		10
FALSE	High	Master Protein	Q9BV44	THUMP domain-containing protein 3 OS=Homo sapiens GN=THUMPD3 PE=1 SV=1	0	22.9221	18.146	9	9	9	1	507	56.967	6.37		9		9
FALSE	High	Master Protein	P14555	Phospholipase A2, membrane associated OS=Homo sapiens GN=PLA2G2A PE=1 SV=2	0.000607903	6.2401	18.0556	2	2	2	1	144	16.072	9.23		2		2
FALSE	High	Master Protein	P60228	Eukaryotic translation initiation factor 3 subunit E OS=Homo sapiens GN=EIF3E PE=1 SV=1	0	20.9404	17.7528	8	8	8	1	445	52.187	6.04		8		8
FALSE	High	Master Protein	P19623	Spermidine synthase OS=Homo sapiens GN=SRM PE=1 SV=1	0	11.1694	17.5497	4	5	4	1	302	33.803	5.49		5		4
FALSE	High	Master Protein	P12814	Alpha-actinin-1 OS=Homo sapiens GN=ACTN1 PE=1 SV=2	0	55.9235	17.4888	14	25	7	1	892	102.993	5.41		25		14
FALSE	High	Master Protein	P28066	Proteasome subunit alpha type-5 OS=Homo sapiens GN=PSMA5 PE=1 SV=3	0	12.4491	17.4274	3	4	3	1	241	26.394	4.79		4		3
FALSE	High	Master Protein	O95757	Heat shock 70 kDa protein 4L OS=Homo sapiens GN=HSPA4L PE=1 SV=3	0	43.8312	17.2825	12	17	9	1	839	94.453	5.88		17		12
FALSE	High	Master Protein	P53992	Protein transport protein Sec24C OS=Homo sapiens GN=SEC24C PE=1 SV=3	0	44.8192	17.2761	14	17	14	1	1094	118.249	7.06		17		14
FALSE	High	Master Protein	Q9BPW8	Protein NipSnap homolog 1 OS=Homo sapiens GN=NIPSNAP1 PE=1 SV=1	0	14.3763	17.2535	4	5	4	1	284	33.289	9.31		5		4
FALSE	High	Master Protein	P52565	Rho GDP-dissociation inhibitor 1 OS=Homo sapiens GN=ARHGDIA PE=1 SV=3	0	6.81973	17.1569	3	4	3	1	204	23.193	5.11		4		3
FALSE	High	Master Protein	P15927	Replication protein A 32 kDa subunit OS=Homo sapiens GN=RPA2 PE=1 SV=1	0	26.9068	17.037	5	7	5	1	270	29.228	6.15		7		5
FALSE	High	Master Protein	P51114	Fragile X mental retardation syndrome-related protein 1 OS=Homo sapiens GN=FXR1 PE=1 SV=3	0	26.8323	16.9082	8	10	6	1	621	69.678	6.15		10		8
FALSE	High	Master Protein	P51149	Ras-related protein Rab-7a OS=Homo sapiens GN=RAB7A PE=1 SV=1	0	10.068	16.9082	3	3	3	1	207	23.475	6.7		3		3
FALSE	High	Master Protein	Q9Y450	HBS1-like protein OS=Homo sapiens GN=HBS1L PE=1 SV=1	0	32.9219	16.8129	9	11	9	1	684	75.426	6.61		11		9
FALSE	High	Master Protein	Q96J01	THO complex subunit 3 OS=Homo sapiens GN=THOC3 PE=1 SV=1	0	16.8185	16.8091	5	5	5	1	351	38.747	6.09		5		5
FALSE	High	Master Protein	Q9GZZ8	Extracellular glycoprotein lacritin OS=Homo sapiens GN=LACRT PE=1 SV=1	0.000607903	6.60426	16.6667	2	2	2	1	138	14.237	5.5		2		2
FALSE	High	Master Protein	Q92890	Ubiquitin fusion degradation protein 1 homolog OS=Homo sapiens GN=UFD1L PE=1 SV=3	0	14.482	16.6124	5	5	5	1	307	34.478	6.7		5		5
FALSE	High	Master Protein	P31150	Rab GDP dissociation inhibitor alpha OS=Homo sapiens GN=GDI1 PE=1 SV=2	0	16.9132	16.5548	6	7	2	1	447	50.55	5.14		7		6
FALSE	High	Master Protein	Q9NP61	ADP-ribosylation factor GTPase-activating protein 3 OS=Homo sapiens GN=ARFGAP3 PE=1 SV=1	0	22.8612	16.4729	7	7	7	1	516	56.893	7.36		7		7
FALSE	High	Master Protein	P23921	Ribonucleoside-diphosphate reductase large subunit OS=Homo sapiens GN=RRM1 PE=1 SV=1	0	35.3929	16.4141	12	16	12	1	792	90.013	7.15		16		12
FALSE	High	Master Protein	Q99615	DnaJ homolog subfamily C member 7 OS=Homo sapiens GN=DNAJC7 PE=1 SV=2	0	19.601	16.3968	7	7	7	1	494	56.405	6.96		7		7
FALSE	High	Master Protein	Q52LJ0	Protein FAM98B OS=Homo sapiens GN=FAM98B PE=1 SV=1	0	14.5852	16.3636	4	5	3	1	330	37.167	6.29		5		4
FALSE	High	Master Protein	O75131	Copine-3 OS=Homo sapiens GN=CPNE3 PE=1 SV=1	0	26.8325	16.2011	7	7	7	1	537	60.092	5.85		7		7
FALSE	High	Master Protein	Q9Y371	Endophilin-B1 OS=Homo sapiens GN=SH3GLB1 PE=1 SV=1	0	14.9836	16.1644	5	5	4	1	365	40.771	6.04		5		5
FALSE	High	Master Protein	Q96Q83	Alpha-ketoglutarate-dependent dioxygenase alkB homolog 3 OS=Homo sapiens GN=ALKBH3 PE=1 SV=1	0	9.29173	16.0839	3	3	3	1	286	33.354	8.4		3		3
FALSE	High	Master Protein	P08243	Asparagine synthetase [glutamine-hydrolyzing] OS=Homo sapiens GN=ASNS PE=1 SV=4	0	22.8993	16.0428	8	8	8	1	561	64.329	6.86		8		8
FALSE	High	Master Protein	P53618	Coatomer subunit beta OS=Homo sapiens GN=COPB1 PE=1 SV=3	0	38.1531	15.9496	11	18	11	1	953	107.074	6.05		18		11
FALSE	High	Master Protein	Q86Y82	Syntaxin-12 OS=Homo sapiens GN=STX12 PE=1 SV=1	0	13.9483	15.942	4	7	4	1	276	31.622	5.59		7		4
FALSE	High	Master Protein	Q9BYJ9	YTH domain-containing family protein 1 OS=Homo sapiens GN=YTHDF1 PE=1 SV=1	0	20.1527	15.9213	6	9	4	1	559	60.836	8.79		9		6
FALSE	High	Master Protein	Q9H3P7	Golgi resident protein GCP60 OS=Homo sapiens GN=ACBD3 PE=1 SV=4	0	18.1015	15.9091	6	7	6	1	528	60.556	5.06		7		6
FALSE	High	Master Protein	Q14194	Dihydropyrimidinase-related protein 1 OS=Homo sapiens GN=CRMP1 PE=1 SV=1	0	19.7048	15.9091	7	7	4	1	572	62.145	7.03		7		7
FALSE	High	Master Protein	Q96L92	Sorting nexin-27 OS=Homo sapiens GN=SNX27 PE=1 SV=2	0	19.1382	15.8965	7	7	7	1	541	61.226	6.49		7		7
FALSE	High	Master Protein	P01766	Ig heavy chain V-III region BRO OS=Homo sapiens PE=1 SV=1	0.00342801	2.87648	15.8333	1	1	1	1	120	13.218	6.57		1		1
FALSE	High	Master Protein	Q9GZT9	Egl nine homolog 1 OS=Homo sapiens GN=EGLN1 PE=1 SV=1	0	13.018	15.7277	5	5	5	1	426	45.992	8.53		5		5
FALSE	High	Master Protein	P17980	26S protease regulatory subunit 6A OS=Homo sapiens GN=PSMC3 PE=1 SV=3	0	17.9529	15.7175	6	6	6	1	439	49.172	5.24		6		6
FALSE	High	Master Protein	Q9BTE3	Mini-chromosome maintenance complex-binding protein OS=Homo sapiens GN=MCMBP PE=1 SV=2	0	26.9249	15.4206	8	12	8	1	642	72.934	5.87		12		8
FALSE	High	Master Protein	Q9NT62	Ubiquitin-like-conjugating enzyme ATG3 OS=Homo sapiens GN=ATG3 PE=1 SV=1	0	15.1246	15.2866	4	5	4	1	314	35.841	4.74		5		4
FALSE	High	Master Protein	Q6IBS0	Twinfilin-2 OS=Homo sapiens GN=TWF2 PE=1 SV=2	0	13.1051	15.1862	3	3	3	1	349	39.523	6.84		3		3
FALSE	High	Master Protein	O75083	WD repeat-containing protein 1 OS=Homo sapiens GN=WDR1 PE=1 SV=4	0	26.1417	15.1815	6	7	6	1	606	66.152	6.65		7		6
FALSE	High	Master Protein	Q9Y4P1	Cysteine protease ATG4B OS=Homo sapiens GN=ATG4B PE=1 SV=2	0	15.3518	15.0127	4	5	4	1	393	44.266	5.07		5		4
FALSE	High	Master Protein	P30086	Phosphatidylethanolamine-binding protein 1 OS=Homo sapiens GN=PEBP1 PE=1 SV=3	0	9.15698	14.9733	2	2	2	1	187	21.044	7.53		2		2
FALSE	High	Master Protein	P18031	Tyrosine-protein phosphatase non-receptor type 1 OS=Homo sapiens GN=PTPN1 PE=1 SV=1	0	14.6391	14.9425	5	5	5	1	435	49.935	6.27		5		5
FALSE	High	Master Protein	O60684	Importin subunit alpha-7 OS=Homo sapiens GN=KPNA6 PE=1 SV=1	0	24.4309	14.9254	7	8	3	1	536	59.991	4.98		8		7
FALSE	High	Master Protein	Q7L0Y3	Mitochondrial ribonuclease P protein 1 OS=Homo sapiens GN=TRMT10C PE=1 SV=2	0	9.02337	14.8883	4	4	4	1	403	47.317	9.36		4		4
FALSE	High	Master Protein	P46736	Lys-63-specific deubiquitinase BRCC36 OS=Homo sapiens GN=BRCC3 PE=1 SV=2	0	8.61279	14.8734	3	3	3	1	316	36.049	5.92		3		3
FALSE	High	Master Protein	P55209	Nucleosome assembly protein 1-like 1 OS=Homo sapiens GN=NAP1L1 PE=1 SV=1	0	28.8421	14.8338	6	8	4	1	391	45.346	4.46		8		6
FALSE	High	Master Protein	Q9UGP4	LIM domain-containing protein 1 OS=Homo sapiens GN=LIMD1 PE=1 SV=1	0	16.7741	14.7929	6	7	6	1	676	72.144	6.65		7		6
FALSE	High	Master Protein	Q9UBV8	Peflin OS=Homo sapiens GN=PEF1 PE=1 SV=1	0	12.42	14.7887	5	5	5	1	284	30.361	6.54		5		5
FALSE	High	Master Protein	Q9H223	EH domain-containing protein 4 OS=Homo sapiens GN=EHD4 PE=1 SV=1	0	18.4933	14.7874	6	6	6	1	541	61.137	6.76		6		6
FALSE	High	Master Protein	P54578	Ubiquitin carboxyl-terminal hydrolase 14 OS=Homo sapiens GN=USP14 PE=1 SV=3	0	14.0987	14.7773	5	5	5	1	494	56.033	5.3		5		5
FALSE	High	Master Protein	Q8TDX7	Serine/threonine-protein kinase Nek7 OS=Homo sapiens GN=NEK7 PE=1 SV=1	0	6.73475	14.5695	3	3	3	1	302	34.528	8.25		3		3
FALSE	High	Master Protein	Q96AC1	Fermitin family homolog 2 OS=Homo sapiens GN=FERMT2 PE=1 SV=1	0	19.7038	14.4118	8	8	8	1	680	77.811	6.7		8		8
FALSE	High	Master Protein	Q01085	Nucleolysin TIAR OS=Homo sapiens GN=TIAL1 PE=1 SV=1	0	19.8747	14.4	6	6	4	1	375	41.564	7.74		6		6
FALSE	High	Master Protein	O94855	Protein transport protein Sec24D OS=Homo sapiens GN=SEC24D PE=1 SV=2	0	32.278	14.3411	12	13	12	1	1032	112.936	7.25		13		12
FALSE	High	Master Protein	Q9UKY7	Protein CDV3 homolog OS=Homo sapiens GN=CDV3 PE=1 SV=1	0	7.97905	14.3411	2	3	2	1	258	27.318	6.4		3		2
FALSE	High	Master Protein	Q7Z2W4	Zinc finger CCCH-type antiviral protein 1 OS=Homo sapiens GN=ZC3HAV1 PE=1 SV=3	0	26.5774	14.3016	11	17	11	1	902	101.367	8.4		17		11
FALSE	High	Master Protein	P28676	Grancalcin OS=Homo sapiens GN=GCA PE=1 SV=2	0	11.9458	14.2857	4	5	4	1	217	23.994	5.21		5		4
FALSE	High	Master Protein	Q9NVS9	Pyridoxine-5'-phosphate oxidase OS=Homo sapiens GN=PNPO PE=1 SV=1	0	9.07151	14.1762	2	3	2	1	261	29.969	7.06		3		2
FALSE	High	Master Protein	P43034	Platelet-activating factor acetylhydrolase IB subunit alpha OS=Homo sapiens GN=PAFAH1B1 PE=1 SV=2	0	12.4757	14.1463	5	5	5	1	410	46.608	7.37		5		5
FALSE	High	Master Protein	P25788	Proteasome subunit alpha type-3 OS=Homo sapiens GN=PSMA3 PE=1 SV=2	0	7.32151	14.1176	3	3	3	1	255	28.415	5.33		3		3
FALSE	High	Master Protein	P29372	DNA-3-methyladenine glycosylase OS=Homo sapiens GN=MPG PE=1 SV=3	0	12.4142	14.094	3	3	3	1	298	32.848	9.57		3		3
FALSE	High	Master Protein	P08134	Rho-related GTP-binding protein RhoC OS=Homo sapiens GN=RHOC PE=1 SV=1	0	11.7135	13.9896	3	3	1	1	193	21.992	6.58		3		3
FALSE	High	Master Protein	Q9NPH2	Inositol-3-phosphate synthase 1 OS=Homo sapiens GN=ISYNA1 PE=1 SV=1	0	24.1383	13.9785	7	8	7	1	558	61.029	5.76		8		7
FALSE	High	Master Protein	O00170	AH receptor-interacting protein OS=Homo sapiens GN=AIP PE=1 SV=2	0	7.54614	13.9394	3	3	3	1	330	37.612	6.29		3		3
FALSE	High	Master Protein	O60884	DnaJ homolog subfamily A member 2 OS=Homo sapiens GN=DNAJA2 PE=1 SV=1	0	9.95493	13.835	4	5	4	1	412	45.717	6.48		5		4
FALSE	High	Master Protein	O15305	Phosphomannomutase 2 OS=Homo sapiens GN=PMM2 PE=1 SV=1	0	8.09822	13.8211	4	4	4	1	246	28.064	6.77		4		4
FALSE	High	Master Protein	P54819	Adenylate kinase 2, mitochondrial OS=Homo sapiens GN=AK2 PE=1 SV=2	0	8.47262	13.8075	2	2	2	1	239	26.461	7.81		2		2
FALSE	High	Master Protein	P19174	1-phosphatidylinositol 4,5-bisphosphate phosphodiesterase gamma-1 OS=Homo sapiens GN=PLCG1 PE=1 SV=1	0	49.241	13.7984	16	20	16	1	1290	148.438	6.05		20		16
FALSE	High	Master Protein	Q8WUP2	Filamin-binding LIM protein 1 OS=Homo sapiens GN=FBLIM1 PE=1 SV=2	0	6.73748	13.6729	3	3	3	1	373	40.643	6.02		3		3
FALSE	High	Master Protein	P11413	Glucose-6-phosphate 1-dehydrogenase OS=Homo sapiens GN=G6PD PE=1 SV=4	0	20.506	13.5922	6	7	6	1	515	59.219	6.84		7		6
FALSE	High	Master Protein	O60678	Protein arginine N-methyltransferase 3 OS=Homo sapiens GN=PRMT3 PE=1 SV=3	0	20.7654	13.5593	6	7	6	1	531	59.838	5.35		7		6
FALSE	High	Master Protein	Q9BT78	COP9 signalosome complex subunit 4 OS=Homo sapiens GN=COPS4 PE=1 SV=1	0	14.3373	13.5468	5	5	5	1	406	46.24	5.83		5		5
FALSE	High	Master Protein	Q9BY77	Polymerase delta-interacting protein 3 OS=Homo sapiens GN=POLDIP3 PE=1 SV=2	0	9.66033	13.5392	3	4	3	1	421	46.06	9.99		4		3
FALSE	High	Master Protein	Q9UPY8	Microtubule-associated protein RP/EB family member 3 OS=Homo sapiens GN=MAPRE3 PE=1 SV=1	0	15.0177	13.5231	5	5	3	1	281	31.962	5.54		5		5
FALSE	High	Master Protein	Q14012	Calcium/calmodulin-dependent protein kinase type 1 OS=Homo sapiens GN=CAMK1 PE=1 SV=1	0	10.206	13.5135	4	4	4	1	370	41.311	5.29		4		4
FALSE	High	Master Protein	O14908	PDZ domain-containing protein GIPC1 OS=Homo sapiens GN=GIPC1 PE=1 SV=2	0	8.30813	13.5135	3	3	3	1	333	36.027	6.28		3		3
FALSE	High	Master Protein	Q14739	Lamin-B receptor OS=Homo sapiens GN=LBR PE=1 SV=2	0	25.3406	13.4959	7	10	7	1	615	70.658	9.36		10		7
FALSE	High	Master Protein	Q8NBF2	NHL repeat-containing protein 2 OS=Homo sapiens GN=NHLRC2 PE=1 SV=1	0	23.4564	13.3609	8	8	8	1	726	79.393	5.55		8		8
FALSE	High	Master Protein	Q9UBQ5	Eukaryotic translation initiation factor 3 subunit K OS=Homo sapiens GN=EIF3K PE=1 SV=1	0.000607903	5.42428	13.3028	2	2	2	1	218	25.043	4.93		2		2
FALSE	High	Master Protein	Q8N6T3	ADP-ribosylation factor GTPase-activating protein 1 OS=Homo sapiens GN=ARFGAP1 PE=1 SV=2	0	14.8875	13.3005	4	5	4	1	406	44.64	5.66		5		4
FALSE	High	Master Protein	Q96B54	Zinc finger protein 428 OS=Homo sapiens GN=ZNF428 PE=1 SV=2	0.00158144	3.41207	13.2979	2	2	2	1	188	20.468	4.17		2		2
FALSE	High	Master Protein	P53990	IST1 homolog OS=Homo sapiens GN=IST1 PE=1 SV=1	0	12.1792	13.1868	5	5	5	1	364	39.725	5.35		5		5
FALSE	High	Master Protein	O15371	Eukaryotic translation initiation factor 3 subunit D OS=Homo sapiens GN=EIF3D PE=1 SV=1	0	20.574	13.1387	5	6	5	1	548	63.932	6.05		6		5
FALSE	High	Master Protein	P25325	3-mercaptopyruvate sulfurtransferase OS=Homo sapiens GN=MPST PE=1 SV=3	0.000607903	6.28687	13.1313	3	3	3	1	297	33.158	6.6		3		3
FALSE	High	Master Protein	Q9Y5A9	YTH domain-containing family protein 2 OS=Homo sapiens GN=YTHDF2 PE=1 SV=2	0	25.965	13.1261	6	10	4	1	579	62.296	8.79		10		6
FALSE	High	Master Protein	P01889	HLA class I histocompatibility antigen, B-7 alpha chain OS=Homo sapiens GN=HLA-B PE=1 SV=3	0.000607903	5.17687	12.9834	3	3	2	1	362	40.435	5.85		3		3
FALSE	High	Master Protein	Q04206	Transcription factor p65 OS=Homo sapiens GN=RELA PE=1 SV=2	0	17.0939	12.8857	5	9	5	1	551	60.181	5.68		9		5
FALSE	High	Master Protein	O14964	Hepatocyte growth factor-regulated tyrosine kinase substrate OS=Homo sapiens GN=HGS PE=1 SV=1	0	25.8903	12.87	10	16	10	1	777	86.138	6.16		16		10
FALSE	High	Master Protein	Q12792	Twinfilin-1 OS=Homo sapiens GN=TWF1 PE=1 SV=3	0	13.4898	12.8571	4	4	4	1	350	40.258	6.96		4		4
FALSE	High	Master Protein	Q9H3L0	Methylmalonic aciduria and homocystinuria type D protein, mitochondrial OS=Homo sapiens GN=MMADHC PE=1 SV=2	0.00202122	3.34363	12.8378	2	2	2	1	296	32.919	5.29		2		2
FALSE	High	Master Protein	Q06203	Amidophosphoribosyltransferase OS=Homo sapiens GN=PPAT PE=1 SV=1	0	14.0928	12.766	5	6	5	1	517	57.362	6.76		6		5
FALSE	High	Master Protein	Q9UL15	BAG family molecular chaperone regulator 5 OS=Homo sapiens GN=BAG5 PE=1 SV=1	0	9.17331	12.7517	4	4	4	1	447	51.168	6.05		4		4
FALSE	High	Master Protein	P34932	Heat shock 70 kDa protein 4 OS=Homo sapiens GN=HSPA4 PE=1 SV=4	0	37.3536	12.619	9	15	7	1	840	94.271	5.19		15		9
FALSE	High	Master Protein	P27144	Adenylate kinase 4, mitochondrial OS=Homo sapiens GN=AK4 PE=1 SV=1	0.000607903	4.84369	12.5561	2	2	2	1	223	25.252	8.4		2		2
FALSE	High	Master Protein	O60701	UDP-glucose 6-dehydrogenase OS=Homo sapiens GN=UGDH PE=1 SV=1	0	11.5788	12.5506	5	5	5	1	494	54.989	7.12		5		5
FALSE	High	Master Protein	Q9NPF4	Probable tRNA N6-adenosine threonylcarbamoyltransferase OS=Homo sapiens GN=OSGEP PE=1 SV=1	0	7.49969	12.5373	3	3	3	1	335	36.403	6.35		3		3
FALSE	High	Master Protein	O76003	Glutaredoxin-3 OS=Homo sapiens GN=GLRX3 PE=1 SV=2	0.000607903	6.48008	12.5373	4	4	4	1	335	37.408	5.39		4		4
FALSE	High	Master Protein	Q15018	BRISC complex subunit Abro1 OS=Homo sapiens GN=FAM175B PE=1 SV=2	0	12.6026	12.5301	5	5	5	1	415	46.872	6.21		5		5
FALSE	High	Master Protein	Q9H857	5'-nucleotidase domain-containing protein 2 OS=Homo sapiens GN=NT5DC2 PE=1 SV=1	0	17.3017	12.5	6	6	6	1	520	60.68	6.77		6		6
FALSE	High	Master Protein	P63000	Ras-related C3 botulinum toxin substrate 1 OS=Homo sapiens GN=RAC1 PE=1 SV=1	0.000607903	5.6752	12.5	2	2	2	1	192	21.436	8.5		2		2
FALSE	High	Master Protein	O60716	Catenin delta-1 OS=Homo sapiens GN=CTNND1 PE=1 SV=1	0	36.2531	12.5	12	16	12	1	968	108.103	6.23		16		12
FALSE	High	Master Protein	Q13263	Transcription intermediary factor 1-beta OS=Homo sapiens GN=TRIM28 PE=1 SV=5	0	19.7547	12.4551	8	8	8	1	835	88.493	5.77		8		8
FALSE	High	Master Protein	P78417	Glutathione S-transferase omega-1 OS=Homo sapiens GN=GSTO1 PE=1 SV=2	0	9.99054	12.4481	4	4	4	1	241	27.548	6.6		4		4
FALSE	High	Master Protein	P09211	Glutathione S-transferase P OS=Homo sapiens GN=GSTP1 PE=1 SV=2	0.00120192	4.41633	12.381	2	2	2	1	210	23.341	5.64		2		2
FALSE	High	Master Protein	Q16630	Cleavage and polyadenylation specificity factor subunit 6 OS=Homo sapiens GN=CPSF6 PE=1 SV=2	0	16.4421	12.3412	5	8	5	1	551	59.173	7.15		8		5
FALSE	High	Master Protein	O00161	Synaptosomal-associated protein 23 OS=Homo sapiens GN=SNAP23 PE=1 SV=1	0	7.69626	12.3223	2	2	2	1	211	23.34	5.01		2		2
FALSE	High	Master Protein	P42574	Caspase-3 OS=Homo sapiens GN=CASP3 PE=1 SV=2	0	9.79105	12.2744	4	5	3	1	277	31.587	6.54		5		4
FALSE	High	Master Protein	Q99733	Nucleosome assembly protein 1-like 4 OS=Homo sapiens GN=NAP1L4 PE=1 SV=1	0	11.6792	12.2667	5	5	3	1	375	42.797	4.69		5		5
FALSE	High	Master Protein	Q13257	Mitotic spindle assembly checkpoint protein MAD2A OS=Homo sapiens GN=MAD2L1 PE=1 SV=1	0.000607903	6.43468	12.1951	3	5	3	1	205	23.495	5.08		5		3
FALSE	High	Master Protein	P61160	Actin-related protein 2 OS=Homo sapiens GN=ACTR2 PE=1 SV=1	0	9.01957	12.1827	4	4	4	1	394	44.732	6.74		4		4
FALSE	High	Master Protein	Q06609	DNA repair protein RAD51 homolog 1 OS=Homo sapiens GN=RAD51 PE=1 SV=1	0	9.48205	12.0944	3	3	3	1	339	36.943	5.6		3		3
FALSE	High	Master Protein	Q8IVM0	Coiled-coil domain-containing protein 50 OS=Homo sapiens GN=CCDC50 PE=1 SV=1	0	7.36967	12.0915	3	3	3	1	306	35.8	6.65		3		3
FALSE	High	Master Protein	Q96EY5	Multivesicular body subunit 12A OS=Homo sapiens GN=MVB12A PE=1 SV=1	0.000607903	5.7314	12.0879	2	2	2	1	273	28.765	8.91		2		2
FALSE	High	Master Protein	P54619	5'-AMP-activated protein kinase subunit gamma-1 OS=Homo sapiens GN=PRKAG1 PE=1 SV=1	0	9.72475	12.0846	4	5	4	1	331	37.556	6.92		5		4
FALSE	High	Master Protein	P52294	Importin subunit alpha-5 OS=Homo sapiens GN=KPNA1 PE=1 SV=3	0	17.4624	12.0818	6	7	2	1	538	60.184	5.01		7		6
FALSE	High	Master Protein	O43251	RNA binding protein fox-1 homolog 2 OS=Homo sapiens GN=RBFOX2 PE=1 SV=3	0.000607903	6.19993	12.0513	3	3	3	1	390	41.348	7.27		3		3
FALSE	High	Master Protein	O75822	Eukaryotic translation initiation factor 3 subunit J OS=Homo sapiens GN=EIF3J PE=1 SV=2	0	9.70347	12.0155	3	3	3	1	258	29.045	4.83		3		3
FALSE	High	Master Protein	O95394	Phosphoacetylglucosamine mutase OS=Homo sapiens GN=PGM3 PE=1 SV=1	0	16.2588	11.9926	7	7	7	1	542	59.814	6.25		7		7
FALSE	High	Master Protein	P54727	UV excision repair protein RAD23 homolog B OS=Homo sapiens GN=RAD23B PE=1 SV=1	0	11.1341	11.9804	5	5	5	1	409	43.145	4.84		5		5
FALSE	High	Master Protein	P26639	Threonine--tRNA ligase, cytoplasmic OS=Homo sapiens GN=TARS PE=1 SV=3	0	21.3943	11.8949	8	9	8	1	723	83.382	6.67		9		8
FALSE	High	Master Protein	P13861	cAMP-dependent protein kinase type II-alpha regulatory subunit OS=Homo sapiens GN=PRKAR2A PE=1 SV=2	0	11.1366	11.8812	4	4	4	1	404	45.49	5.07		4		4
FALSE	High	Master Protein	Q9UHY7	Enolase-phosphatase E1 OS=Homo sapiens GN=ENOPH1 PE=1 SV=1	0.00202122	3.1216	11.8774	2	2	2	1	261	28.914	4.78		2		2
FALSE	High	Master Protein	P62081	40S ribosomal protein S7 OS=Homo sapiens GN=RPS7 PE=1 SV=1	0.000607903	6.39731	11.8557	3	4	3	1	194	22.113	10.1		4		3
FALSE	High	Master Protein	O95816	BAG family molecular chaperone regulator 2 OS=Homo sapiens GN=BAG2 PE=1 SV=1	0.000607903	4.642	11.8483	2	2	2	1	211	23.757	6.7		2		2
FALSE	High	Master Protein	P53041	Serine/threonine-protein phosphatase 5 OS=Homo sapiens GN=PPP5C PE=1 SV=1	0	14.1343	11.8236	5	5	5	1	499	56.842	6.28		5		5
FALSE	High	Master Protein	O00743	Serine/threonine-protein phosphatase 6 catalytic subunit OS=Homo sapiens GN=PPP6C PE=1 SV=1	0	9.70962	11.8033	3	3	3	1	305	35.121	5.69		3		3
FALSE	High	Master Protein	Q8TD19	Serine/threonine-protein kinase Nek9 OS=Homo sapiens GN=NEK9 PE=1 SV=2	0	23.3067	11.6445	10	11	10	1	979	107.1	5.74		11		10
FALSE	High	Master Protein	P41214	Eukaryotic translation initiation factor 2D OS=Homo sapiens GN=EIF2D PE=1 SV=3	0	11.2777	11.6438	5	5	5	1	584	64.666	7.65		5		5
FALSE	High	Master Protein	P23588	Eukaryotic translation initiation factor 4B OS=Homo sapiens GN=EIF4B PE=1 SV=2	0	18.7072	11.6203	6	10	6	1	611	69.11	5.73		10		6
FALSE	High	Master Protein	Q9HAD4	WD repeat-containing protein 41 OS=Homo sapiens GN=WDR41 PE=2 SV=3	0	12.0156	11.5468	4	4	4	1	459	51.695	5.44		4		4
FALSE	High	Master Protein	P55735	Protein SEC13 homolog OS=Homo sapiens GN=SEC13 PE=1 SV=3	0	10.7252	11.4907	3	3	3	1	322	35.518	5.48		3		3
FALSE	High	Master Protein	P19388	DNA-directed RNA polymerases I, II, and III subunit RPABC1 OS=Homo sapiens GN=POLR2E PE=1 SV=4	0.000607903	5.10577	11.4286	2	2	2	1	210	24.536	5.95		2		2
FALSE	High	Master Protein	Q9UG63	ATP-binding cassette sub-family F member 2 OS=Homo sapiens GN=ABCF2 PE=1 SV=2	0	13.0337	11.3965	6	6	6	1	623	71.245	7.37		6		6
FALSE	High	Master Protein	O75821	Eukaryotic translation initiation factor 3 subunit G OS=Homo sapiens GN=EIF3G PE=1 SV=2	0	9.30678	11.25	3	3	3	1	320	35.589	6.13		3		3
FALSE	High	Master Protein	Q96AB3	Isochorismatase domain-containing protein 2, mitochondrial OS=Homo sapiens GN=ISOC2 PE=1 SV=1	0.00342801	2.91364	11.2195	1	1	1	1	205	22.323	7.77		1		1
FALSE	High	Master Protein	A6NDG6	Phosphoglycolate phosphatase OS=Homo sapiens GN=PGP PE=1 SV=1	0	12.053	11.215	3	3	3	1	321	33.985	6.14		3		3
FALSE	High	Master Protein	P50225	Sulfotransferase 1A1 OS=Homo sapiens GN=SULT1A1 PE=1 SV=3	0.000607903	5.66574	11.1864	3	3	3	1	295	34.143	6.62		3		3
FALSE	High	Master Protein	Q9HB07	UPF0160 protein MYG1, mitochondrial OS=Homo sapiens GN=C12orf10 PE=1 SV=2	0	11.1702	11.1702	4	5	4	1	376	42.422	6.67		5		4
FALSE	High	Master Protein	Q8TC07	TBC1 domain family member 15 OS=Homo sapiens GN=TBC1D15 PE=1 SV=2	0	19.1463	11.1433	7	7	7	1	691	79.44	5.67		7		7
FALSE	High	Master Protein	Q99961	Endophilin-A2 OS=Homo sapiens GN=SH3GL1 PE=1 SV=1	0	10.5715	11.1413	3	5	3	1	368	41.464	5.43		5		3
FALSE	High	Master Protein	Q9NR50	Translation initiation factor eIF-2B subunit gamma OS=Homo sapiens GN=EIF2B3 PE=1 SV=1	0	10.3173	11.0619	3	3	3	1	452	50.208	6.47		3		3
FALSE	High	Master Protein	Q9UJ70	N-acetyl-D-glucosamine kinase OS=Homo sapiens GN=NAGK PE=1 SV=4	0.000607903	5.70561	11.0465	3	3	3	1	344	37.352	6.24		3		3
FALSE	High	Master Protein	P14866	Heterogeneous nuclear ribonucleoprotein L OS=Homo sapiens GN=HNRNPL PE=1 SV=2	0	14.8767	11.0357	5	5	4	1	589	64.092	8.22		5		5
FALSE	High	Master Protein	Q9NWS0	PIH1 domain-containing protein 1 OS=Homo sapiens GN=PIH1D1 PE=1 SV=1	0	7.701	11.0345	3	3	3	1	290	32.342	5.14		3		3
FALSE	High	Master Protein	Q96F86	Enhancer of mRNA-decapping protein 3 OS=Homo sapiens GN=EDC3 PE=1 SV=1	0	14.3579	11.0236	4	4	4	1	508	56.042	7.11		4		4
FALSE	High	Master Protein	P49427	Ubiquitin-conjugating enzyme E2 R1 OS=Homo sapiens GN=CDC34 PE=1 SV=2	0.00158144	4.24262	11.0169	2	2	2	1	236	26.72	4.54		2		2
FALSE	High	Master Protein	P27816	Microtubule-associated protein 4 OS=Homo sapiens GN=MAP4 PE=1 SV=3	0	29.0782	10.9375	10	10	10	1	1152	120.93	5.43		10		10
FALSE	High	Master Protein	Q9UGI8	Testin OS=Homo sapiens GN=TES PE=1 SV=1	0	7.62682	10.9264	4	4	4	1	421	47.964	7.68		4		4
FALSE	High	Master Protein	P07384	Calpain-1 catalytic subunit OS=Homo sapiens GN=CAPN1 PE=1 SV=1	0	19.0445	10.9244	7	9	7	1	714	81.838	5.67		9		7
FALSE	High	Master Protein	Q9H7E9	UPF0488 protein C8orf33 OS=Homo sapiens GN=C8orf33 PE=1 SV=1	0.000607903	5.29514	10.917	2	2	2	1	229	24.977	9.95		2		2
FALSE	High	Master Protein	P55010	Eukaryotic translation initiation factor 5 OS=Homo sapiens GN=EIF5 PE=1 SV=2	0	6.79044	10.9049	3	3	3	1	431	49.192	5.58		3		3
FALSE	High	Master Protein	P31483	Nucleolysin TIA-1 isoform p40 OS=Homo sapiens GN=TIA1 PE=1 SV=3	0	12.8722	10.8808	4	4	2	1	386	42.936	7.74		4		4
FALSE	High	Master Protein	Q00577	Transcriptional activator protein Pur-alpha OS=Homo sapiens GN=PURA PE=1 SV=2	0	7.59224	10.8696	2	2	2	1	322	34.889	6.44		2		2
FALSE	High	Master Protein	Q8NFH3	Nucleoporin Nup43 OS=Homo sapiens GN=NUP43 PE=1 SV=1	0	16.7828	10.7895	3	4	3	1	380	42.124	5.63		4		3
FALSE	High	Master Protein	Q9UNN5	FAS-associated factor 1 OS=Homo sapiens GN=FAF1 PE=1 SV=2	0	14.8715	10.7692	7	8	7	1	650	73.908	4.88		8		7
FALSE	High	Master Protein	Q9BV86	N-terminal Xaa-Pro-Lys N-methyltransferase 1 OS=Homo sapiens GN=NTMT1 PE=1 SV=3	0.000607903	5.41389	10.7623	2	2	2	1	223	25.371	5.52		2		2
FALSE	High	Master Protein	O00560	Syntenin-1 OS=Homo sapiens GN=SDCBP PE=1 SV=1	0.000607903	5.71977	10.7383	2	2	2	1	298	32.424	7.53		2		2
FALSE	High	Master Protein	Q13098	COP9 signalosome complex subunit 1 OS=Homo sapiens GN=GPS1 PE=1 SV=4	0	11.6661	10.5906	5	5	5	1	491	55.501	6.74		5		5
FALSE	High	Master Protein	Q96IZ0	PRKC apoptosis WT1 regulator protein OS=Homo sapiens GN=PAWR PE=1 SV=1	0	9.85719	10.5882	3	3	3	1	340	36.545	5.41		3		3
FALSE	High	Master Protein	Q9HC52	Chromobox protein homolog 8 OS=Homo sapiens GN=CBX8 PE=1 SV=3	0.000607903	5.49413	10.5398	3	3	3	1	389	43.369	9.91		3		3
FALSE	High	Master Protein	P46108	Adapter molecule crk OS=Homo sapiens GN=CRK PE=1 SV=2	0	9.24303	10.5263	3	5	3	1	304	33.81	5.55		5		3
FALSE	High	Master Protein	Q9BXP5	Serrate RNA effector molecule homolog OS=Homo sapiens GN=SRRT PE=1 SV=1	0	20.5004	10.5023	8	8	8	1	876	100.604	5.96		8		8
FALSE	High	Master Protein	P51659	Peroxisomal multifunctional enzyme type 2 OS=Homo sapiens GN=HSD17B4 PE=1 SV=3	0	14.6091	10.462	6	7	6	1	736	79.636	8.84		7		6
FALSE	High	Master Protein	Q01518	Adenylyl cyclase-associated protein 1 OS=Homo sapiens GN=CAP1 PE=1 SV=5	0	11.5345	10.3158	4	4	4	1	475	51.869	8.06		4		4
FALSE	High	Master Protein	P31939	Bifunctional purine biosynthesis protein PURH OS=Homo sapiens GN=ATIC PE=1 SV=3	0	10.1861	10.3041	4	4	4	1	592	64.575	6.71		4		4
FALSE	High	Master Protein	O43759	Synaptogyrin-1 OS=Homo sapiens GN=SYNGR1 PE=1 SV=2	0.000607903	6.39776	10.3004	2	2	2	1	233	25.439	4.68		2		2
FALSE	High	Master Protein	Q08J23	tRNA (cytosine(34)-C(5))-methyltransferase OS=Homo sapiens GN=NSUN2 PE=1 SV=2	0	20.2241	10.2999	8	12	8	1	767	86.416	6.77		12		8
FALSE	High	Master Protein	O15269	Serine palmitoyltransferase 1 OS=Homo sapiens GN=SPTLC1 PE=1 SV=1	0	11.1986	10.148	4	5	4	1	473	52.71	6.01		5		4
FALSE	High	Master Protein	Q9NR46	Endophilin-B2 OS=Homo sapiens GN=SH3GLB2 PE=1 SV=1	0	10.1882	10.1266	4	4	3	1	395	43.947	5.99		4		4
FALSE	High	Master Protein	O15126	Secretory carrier-associated membrane protein 1 OS=Homo sapiens GN=SCAMP1 PE=1 SV=2	0.000607903	6.35188	10.0592	2	2	2	1	338	37.896	7.42		2		2
FALSE	High	Master Protein	Q5TDH0	Protein DDI1 homolog 2 OS=Homo sapiens GN=DDI2 PE=1 SV=1	0	10.6168	10.0251	3	3	3	1	399	44.495	5.05		3		3
FALSE	High	Master Protein	O43353	Receptor-interacting serine/threonine-protein kinase 2 OS=Homo sapiens GN=RIPK2 PE=1 SV=2	0	10.9129	10	4	4	4	1	540	61.156	7.09		4		4
FALSE	High	Master Protein	O00273	DNA fragmentation factor subunit alpha OS=Homo sapiens GN=DFFA PE=1 SV=1	0	7.37907	9.96979	3	5	3	1	331	36.5	4.79		5		3
FALSE	High	Master Protein	Q07666	KH domain-containing, RNA-binding, signal transduction-associated protein 1 OS=Homo sapiens GN=KHDRBS1 PE=1 SV=1	0	10.3403	9.93228	4	5	4	1	443	48.197	8.66		5		4
FALSE	High	Master Protein	Q9H078	Caseinolytic peptidase B protein homolog OS=Homo sapiens GN=CLPB PE=1 SV=1	0	21.7237	9.90099	5	6	5	1	707	78.68	9.01		6		5
FALSE	High	Master Protein	P54687	Branched-chain-amino-acid aminotransferase, cytosolic OS=Homo sapiens GN=BCAT1 PE=1 SV=3	0	10.57	9.84456	3	4	3	1	386	42.939	5.3		4		3
FALSE	High	Master Protein	Q12907	Vesicular integral-membrane protein VIP36 OS=Homo sapiens GN=LMAN2 PE=1 SV=1	0	7.37596	9.83146	3	3	3	1	356	40.203	6.95		3		3
FALSE	High	Master Protein	P15170	Eukaryotic peptide chain release factor GTP-binding subunit ERF3A OS=Homo sapiens GN=GSPT1 PE=1 SV=1	0	16.0666	9.81964	6	7	6	1	499	55.72	5.62		7		6
FALSE	High	Master Protein	O14531	Dihydropyrimidinase-related protein 4 OS=Homo sapiens GN=DPYSL4 PE=1 SV=2	0	8.4489	9.79021	4	4	4	1	572	61.838	7.09		4		4
FALSE	High	Master Protein	P36507	Dual specificity mitogen-activated protein kinase kinase 2 OS=Homo sapiens GN=MAP2K2 PE=1 SV=1	0	7.21915	9.75	3	3	2	1	400	44.396	6.55		3		3
FALSE	High	Master Protein	O14579	Coatomer subunit epsilon OS=Homo sapiens GN=COPE PE=1 SV=3	0.000607903	5.45527	9.74026	2	2	2	1	308	34.46	5.12		2		2
FALSE	High	Master Protein	Q86W34	Archaemetzincin-2 OS=Homo sapiens GN=AMZ2 PE=1 SV=2	0	8.15398	9.72222	3	3	3	1	360	41.237	8.15		3		3
FALSE	High	Master Protein	O14734	Acyl-coenzyme A thioesterase 8 OS=Homo sapiens GN=ACOT8 PE=1 SV=1	0.000607903	4.64898	9.71787	2	2	2	1	319	35.891	7.56		2		2
FALSE	High	Master Protein	Q14318	Peptidyl-prolyl cis-trans isomerase FKBP8 OS=Homo sapiens GN=FKBP8 PE=1 SV=2	0	11.8759	9.70874	3	3	3	1	412	44.534	4.84		3		3
FALSE	High	Master Protein	Q9BVL2	Nucleoporin p58/p45 OS=Homo sapiens GN=NUPL1 PE=1 SV=1	0	14.6399	9.6828	4	4	4	1	599	60.86	9.33		4		4
FALSE	High	Master Protein	P15104	Glutamine synthetase OS=Homo sapiens GN=GLUL PE=1 SV=4	0	8.4193	9.65147	3	4	3	1	373	42.037	6.89		4		3
FALSE	High	Master Protein	P62910	60S ribosomal protein L32 OS=Homo sapiens GN=RPL32 PE=1 SV=2	0.00376294	2.78146	9.62963	1	1	1	1	135	15.85	11.33		1		1
FALSE	High	Master Protein	Q8N0X7	Spartin OS=Homo sapiens GN=SPG20 PE=1 SV=1	0	7.4888	9.60961	4	4	4	1	666	72.788	5.91		4		4
FALSE	High	Master Protein	Q9NR31	GTP-binding protein SAR1a OS=Homo sapiens GN=SAR1A PE=1 SV=1	0.000607903	5.79525	9.59596	2	2	2	1	198	22.353	6.68		2		2
FALSE	High	Master Protein	O15400	Syntaxin-7 OS=Homo sapiens GN=STX7 PE=1 SV=4	0.000607903	4.74782	9.57854	2	2	2	1	261	29.797	5.55		2		2
FALSE	High	Master Protein	P55212	Caspase-6 OS=Homo sapiens GN=CASP6 PE=1 SV=2	0.000607903	5.63753	9.55631	2	3	1	1	293	33.288	6.93		3		2
FALSE	High	Master Protein	Q9GZT8	NIF3-like protein 1 OS=Homo sapiens GN=NIF3L1 PE=1 SV=2	0.000607903	5.0557	9.54907	2	2	2	1	377	41.942	6.65		2		2
FALSE	High	Master Protein	Q8TAT6	Nuclear protein localization protein 4 homolog OS=Homo sapiens GN=NPLOC4 PE=1 SV=3	0	11.3189	9.53947	4	5	4	1	608	68.077	6.38		5		4
FALSE	High	Master Protein	P30153	Serine/threonine-protein phosphatase 2A 65 kDa regulatory subunit A alpha isoform OS=Homo sapiens GN=PPP2R1A PE=1 SV=4	0	15.5298	9.50764	5	7	5	1	589	65.267	5.11		7		5
FALSE	High	Master Protein	P41250	Glycine--tRNA ligase OS=Homo sapiens GN=GARS PE=1 SV=3	0	19.4794	9.47226	7	9	7	1	739	83.113	7.03		9		7
FALSE	High	Master Protein	P68400	Casein kinase II subunit alpha OS=Homo sapiens GN=CSNK2A1 PE=1 SV=1	0	8.48123	9.46292	3	3	2	1	391	45.115	7.74		3		3
FALSE	High	Master Protein	P61289	Proteasome activator complex subunit 3 OS=Homo sapiens GN=PSME3 PE=1 SV=1	0	6.84656	9.44882	2	2	2	1	254	29.488	5.95		2		2
FALSE	High	Master Protein	P13995	Bifunctional methylenetetrahydrofolate dehydrogenase/cyclohydrolase, mitochondrial OS=Homo sapiens GN=MTHFD2 PE=1 SV=2	0	6.91238	9.42857	3	3	3	1	350	37.871	8.73		3		3
FALSE	High	Master Protein	Q9H2U1	ATP-dependent RNA helicase DHX36 OS=Homo sapiens GN=DHX36 PE=1 SV=2	0	17.5701	9.4246	8	10	8	1	1008	114.688	7.68		10		8
FALSE	High	Master Protein	Q9BY44	Eukaryotic translation initiation factor 2A OS=Homo sapiens GN=EIF2A PE=1 SV=3	0	11.2143	9.40171	4	4	4	1	585	64.949	8.87		4		4
FALSE	High	Master Protein	P62714	Serine/threonine-protein phosphatase 2A catalytic subunit beta isoform OS=Homo sapiens GN=PPP2CB PE=1 SV=1	0	8.90287	9.38511	2	2	1	1	309	35.552	5.43		2		2
FALSE	High	Master Protein	O60784	Target of Myb protein 1 OS=Homo sapiens GN=TOM1 PE=1 SV=2	0.000607903	5.39854	9.34959	2	2	2	1	492	53.785	4.7		2		2
FALSE	High	Master Protein	Q9NRG1	Phosphoribosyltransferase domain-containing protein 1 OS=Homo sapiens GN=PRTFDC1 PE=1 SV=1	0.000607903	5.24169	9.33333	2	2	1	1	225	25.657	6.15		2		2
FALSE	High	Master Protein	P62070	Ras-related protein R-Ras2 OS=Homo sapiens GN=RRAS2 PE=1 SV=1	0.000607903	5.20412	9.31373	2	2	2	1	204	23.385	6.01		2		2
FALSE	High	Master Protein	Q99598	Translin-associated protein X OS=Homo sapiens GN=TSNAX PE=1 SV=1	0.000607903	5.56309	9.31034	2	2	2	1	290	33.092	6.55		2		2
FALSE	High	Master Protein	P61163	Alpha-centractin OS=Homo sapiens GN=ACTR1A PE=1 SV=1	0.00158144	3.72207	9.30851	2	2	2	1	376	42.587	6.64		2		2
FALSE	High	Master Protein	P00387	NADH-cytochrome b5 reductase 3 OS=Homo sapiens GN=CYB5R3 PE=1 SV=3	0	8.44145	9.30233	2	2	2	1	301	34.213	7.59		2		2
FALSE	High	Master Protein	P40925	Malate dehydrogenase, cytoplasmic OS=Homo sapiens GN=MDH1 PE=1 SV=4	0	8.41346	9.28144	3	4	3	1	334	36.403	7.36		4		3
FALSE	High	Master Protein	Q96P47	Arf-GAP with GTPase, ANK repeat and PH domain-containing protein 3 OS=Homo sapiens GN=AGAP3 PE=1 SV=2	0	15.7889	9.25714	7	10	7	1	875	94.985	7.97		10		7
FALSE	High	Master Protein	Q9UNF1	Melanoma-associated antigen D2 OS=Homo sapiens GN=MAGED2 PE=1 SV=2	0	12.2178	9.24092	5	5	5	1	606	64.914	9.32		5		5
FALSE	High	Master Protein	Q04760	Lactoylglutathione lyase OS=Homo sapiens GN=GLO1 PE=1 SV=4	0.00202122	3.21581	9.23913	1	1	1	1	184	20.764	5.31		1		1
FALSE	High	Master Protein	Q9BRF8	Serine/threonine-protein phosphatase CPPED1 OS=Homo sapiens GN=CPPED1 PE=1 SV=3	0	7.43666	9.23567	3	3	3	1	314	35.526	6.2		3		3
FALSE	High	Master Protein	Q9Y697	Cysteine desulfurase, mitochondrial OS=Homo sapiens GN=NFS1 PE=1 SV=3	0	9.03816	9.19037	3	3	3	1	457	50.164	8.31		3		3
FALSE	High	Master Protein	O94979	Protein transport protein Sec31A OS=Homo sapiens GN=SEC31A PE=1 SV=3	0	25.9757	9.18033	10	11	10	1	1220	132.931	6.89		11		10
FALSE	High	Master Protein	Q9GZZ9	Ubiquitin-like modifier-activating enzyme 5 OS=Homo sapiens GN=UBA5 PE=1 SV=1	0	8.42727	9.15842	3	3	3	1	404	44.834	4.84		3		3
FALSE	High	Master Protein	P19784	Casein kinase II subunit alpha' OS=Homo sapiens GN=CSNK2A2 PE=1 SV=1	0	7.32711	9.14286	3	3	2	1	350	41.187	8.56		3		3
FALSE	High	Master Protein	P03973	Antileukoproteinase OS=Homo sapiens GN=SLPI PE=1 SV=2	0.00342801	2.84103	9.09091	1	1	1	1	132	14.316	8.75		1		1
FALSE	High	Master Protein	P48735	Isocitrate dehydrogenase [NADP], mitochondrial OS=Homo sapiens GN=IDH2 PE=1 SV=2	0	7.49236	9.0708	3	3	3	1	452	50.877	8.69		3		3
FALSE	High	Master Protein	Q53GG5	PDZ and LIM domain protein 3 OS=Homo sapiens GN=PDLIM3 PE=1 SV=1	0	8.4971	9.06593	2	2	2	1	364	39.207	6.89		2		2
FALSE	High	Master Protein	Q9NW64	Pre-mRNA-splicing factor RBM22 OS=Homo sapiens GN=RBM22 PE=1 SV=1	0.000607903	6.39454	9.04762	3	3	3	1	420	46.865	8.54		3		3
FALSE	High	Master Protein	Q96KB5	Lymphokine-activated killer T-cell-originated protein kinase OS=Homo sapiens GN=PBK PE=1 SV=3	0	7.37448	9.00621	3	3	3	1	322	36.062	5.12		3		3
FALSE	Medium	Master Protein	Q9H1E1	Ribonuclease 7 OS=Homo sapiens GN=RNASE7 PE=1 SV=2	0.0476699	1.27287	8.97436	1	1	1	1	156	17.408	9.69		1		1
FALSE	High	Master Protein	Q07065	Cytoskeleton-associated protein 4 OS=Homo sapiens GN=CKAP4 PE=1 SV=2	0	10.0344	8.9701	5	5	4	1	602	65.983	5.92		5		5
FALSE	High	Master Protein	P98172	Ephrin-B1 OS=Homo sapiens GN=EFNB1 PE=1 SV=1	0	8.61684	8.95954	2	2	2	1	346	37.982	8.94		2		2
FALSE	High	Master Protein	P41227	N-alpha-acetyltransferase 10 OS=Homo sapiens GN=NAA10 PE=1 SV=1	0.000607903	5.83359	8.93617	2	2	2	1	235	26.442	5.64		2		2
FALSE	High	Master Protein	Q9H3N1	Thioredoxin-related transmembrane protein 1 OS=Homo sapiens GN=TMX1 PE=1 SV=1	0.000607903	4.49115	8.92857	2	2	2	1	280	31.771	4.98		2		2
FALSE	High	Master Protein	Q96MW1	Coiled-coil domain-containing protein 43 OS=Homo sapiens GN=CCDC43 PE=1 SV=2	0.000607903	5.26648	8.92857	2	2	2	1	224	25.233	4.92		2		2
FALSE	High	Master Protein	Q96RS6	NudC domain-containing protein 1 OS=Homo sapiens GN=NUDCD1 PE=1 SV=2	0	12.6386	8.91938	5	5	5	1	583	66.713	5.11		5		5
FALSE	High	Master Protein	Q96HC4	PDZ and LIM domain protein 5 OS=Homo sapiens GN=PDLIM5 PE=1 SV=5	0	14.5887	8.89262	5	6	5	1	596	63.904	8.21		6		5
FALSE	High	Master Protein	Q14444	Caprin-1 OS=Homo sapiens GN=CAPRIN1 PE=1 SV=2	0	21.451	8.88575	6	12	6	1	709	78.318	5.25		12		6
FALSE	High	Master Protein	Q9Y4U1	Methylmalonic aciduria and homocystinuria type C protein OS=Homo sapiens GN=MMACHC PE=1 SV=3	0.000607903	6.29728	8.86525	2	2	2	1	282	31.708	7.81		2		2
FALSE	High	Master Protein	Q9BTE7	DCN1-like protein 5 OS=Homo sapiens GN=DCUN1D5 PE=1 SV=1	0.00158144	3.42677	8.86076	2	2	2	1	237	27.491	5.58		2		2
FALSE	High	Master Protein	Q13418	Integrin-linked protein kinase OS=Homo sapiens GN=ILK PE=1 SV=2	0	9.16873	8.84956	4	4	4	1	452	51.386	8.07		4		4
FALSE	High	Master Protein	Q9BW27	Nuclear pore complex protein Nup85 OS=Homo sapiens GN=NUP85 PE=1 SV=1	0	16.3513	8.84146	5	5	5	1	656	74.971	5.55		5		5
FALSE	High	Master Protein	Q71RC2	La-related protein 4 OS=Homo sapiens GN=LARP4 PE=1 SV=3	0	11.1432	8.83978	5	5	5	1	724	80.546	6.61		5		5
FALSE	High	Master Protein	Q96A49	Synapse-associated protein 1 OS=Homo sapiens GN=SYAP1 PE=1 SV=1	0.00158144	4.13269	8.80682	2	2	2	1	352	39.909	4.53		2		2
FALSE	High	Master Protein	Q9H074	Polyadenylate-binding protein-interacting protein 1 OS=Homo sapiens GN=PAIP1 PE=1 SV=1	0	8.31138	8.76827	3	5	3	1	479	53.491	4.81		5		3
FALSE	Medium	Master Protein	Q9BY32	Inosine triphosphate pyrophosphatase OS=Homo sapiens GN=ITPA PE=1 SV=2	0.0114099	1.89279	8.76289	1	1	1	1	194	21.432	5.66		1		1
FALSE	High	Master Protein	P56945	Breast cancer anti-estrogen resistance protein 1 OS=Homo sapiens GN=BCAR1 PE=1 SV=2	0	12.2193	8.73563	5	5	5	1	870	93.314	5.67		5		5
FALSE	High	Master Protein	P10746	Uroporphyrinogen-III synthase OS=Homo sapiens GN=UROS PE=1 SV=1	0.000607903	4.68843	8.67925	2	2	2	1	265	28.61	5.48		2		2
FALSE	High	Master Protein	O75439	Mitochondrial-processing peptidase subunit beta OS=Homo sapiens GN=PMPCB PE=1 SV=2	0	12.4394	8.58896	3	4	3	1	489	54.331	6.83		4		3
FALSE	High	Master Protein	O43583	Density-regulated protein OS=Homo sapiens GN=DENR PE=1 SV=2	0.000607903	5.15895	8.58586	1	1	1	1	198	22.078	5.3		1		1
FALSE	High	Master Protein	Q8WVD3	E3 ubiquitin-protein ligase RNF138 OS=Homo sapiens GN=RNF138 PE=1 SV=1	0.000607903	4.51469	8.57143	2	2	2	1	245	28.174	6.93		2		2
FALSE	High	Master Protein	Q14165	Malectin OS=Homo sapiens GN=MLEC PE=1 SV=1	0	7.18003	8.56164	2	2	2	1	292	32.214	5.41		2		2
FALSE	High	Master Protein	P60510	Serine/threonine-protein phosphatase 4 catalytic subunit OS=Homo sapiens GN=PPP4C PE=1 SV=1	0	8.57988	8.46906	2	2	1	1	307	35.057	5.06		2		2
FALSE	High	Master Protein	Q6P1Q9	Methyltransferase-like protein 2B OS=Homo sapiens GN=METTL2B PE=1 SV=3	0.000607903	6.61362	8.46561	2	2	2	1	378	43.398	5.86		2		2
FALSE	High	Master Protein	O60256	Phosphoribosyl pyrophosphate synthase-associated protein 2 OS=Homo sapiens GN=PRPSAP2 PE=1 SV=1	0.000607903	6.42215	8.40108	3	3	3	1	369	40.899	7.44		3		3
FALSE	High	Master Protein	Q06787	Fragile X mental retardation protein 1 OS=Homo sapiens GN=FMR1 PE=1 SV=1	0	13.3316	8.38608	5	5	3	1	632	71.131	7.42		5		5
FALSE	High	Master Protein	P51812	Ribosomal protein S6 kinase alpha-3 OS=Homo sapiens GN=RPS6KA3 PE=1 SV=1	0	12.4126	8.37838	5	6	4	1	740	83.683	6.89		6		5
FALSE	High	Master Protein	Q12800	Alpha-globin transcription factor CP2 OS=Homo sapiens GN=TFCP2 PE=1 SV=2	0	12.6366	8.36653	4	4	4	1	502	57.22	5.8		4		4
FALSE	High	Master Protein	Q96CD2	Phosphopantothenoylcysteine decarboxylase OS=Homo sapiens GN=PPCDC PE=1 SV=2	0.00740741	2.29414	8.33333	1	1	1	1	204	22.381	6.1		1		1
FALSE	Medium	Master Protein	Q96S44	TP53-regulating kinase OS=Homo sapiens GN=TP53RK PE=1 SV=2	0.0121753	1.87943	8.3004	1	1	1	1	253	28.143	9.54		1		1
FALSE	High	Master Protein	Q7Z3B4	Nucleoporin p54 OS=Homo sapiens GN=NUP54 PE=1 SV=2	0	7.63353	8.28402	3	3	3	1	507	55.401	7.02		3		3
FALSE	High	Master Protein	P49840	Glycogen synthase kinase-3 alpha OS=Homo sapiens GN=GSK3A PE=1 SV=2	0	8.49736	8.28157	3	3	2	1	483	50.949	8.75		3		3
FALSE	Medium	Master Protein	Q9BTK6	PAXIP1-associated glutamate-rich protein 1 OS=Homo sapiens GN=PAGR1 PE=1 SV=1	0.0183633	1.77599	8.26772	1	1	1	1	254	27.699	4.46		1		1
FALSE	High	Master Protein	P35659	Protein DEK OS=Homo sapiens GN=DEK PE=1 SV=1	0.000607903	5.98179	8.26667	3	3	3	1	375	42.648	8.56		3		3
FALSE	High	Master Protein	P40222	Alpha-taxilin OS=Homo sapiens GN=TXLNA PE=1 SV=3	0	9.68257	8.24176	3	3	3	1	546	61.853	6.52		3		3
FALSE	High	Master Protein	Q8WU90	Zinc finger CCCH domain-containing protein 15 OS=Homo sapiens GN=ZC3H15 PE=1 SV=1	0	6.87365	8.21596	2	2	2	1	426	48.573	5.31		2		2
FALSE	High	Master Protein	Q7Z417	Nuclear fragile X mental retardation-interacting protein 2 OS=Homo sapiens GN=NUFIP2 PE=1 SV=1	0	9.01043	8.20144	4	4	4	1	695	76.075	8.7		4		4
FALSE	High	Master Protein	P78356	Phosphatidylinositol 5-phosphate 4-kinase type-2 beta OS=Homo sapiens GN=PIP4K2B PE=1 SV=1	0.000607903	5.44829	8.17308	2	2	1	1	416	47.348	7.33		2		2
FALSE	High	Master Protein	P22681	E3 ubiquitin-protein ligase CBL OS=Homo sapiens GN=CBL PE=1 SV=2	0	12.5251	8.16777	6	6	6	1	906	99.569	6.54		6		6
FALSE	High	Master Protein	Q15796	Mothers against decapentaplegic homolog 2 OS=Homo sapiens GN=SMAD2 PE=1 SV=1	0.000607903	5.48809	8.13704	2	2	2	1	467	52.273	6.58		2		2
FALSE	High	Master Protein	Q04446	1,4-alpha-glucan-branching enzyme OS=Homo sapiens GN=GBE1 PE=1 SV=3	0	10.0413	8.11966	5	5	5	1	702	80.423	6.32		5		5
FALSE	High	Master Protein	Q9BV38	WD repeat-containing protein 18 OS=Homo sapiens GN=WDR18 PE=1 SV=2	0	9.66022	8.10185	3	3	3	1	432	47.375	6.7		3		3
FALSE	High	Master Protein	Q8TDL5	BPI fold-containing family B member 1 OS=Homo sapiens GN=BPIFB1 PE=1 SV=1	0	8.90103	8.05785	3	3	3	1	484	52.408	7.23		3		3
FALSE	High	Master Protein	Q16513	Serine/threonine-protein kinase N2 OS=Homo sapiens GN=PKN2 PE=1 SV=1	0	18.6258	8.02846	7	7	7	1	984	111.964	6.3		7		7
FALSE	High	Master Protein	P56192	Methionine--tRNA ligase, cytoplasmic OS=Homo sapiens GN=MARS PE=1 SV=2	0	20.4388	8	6	8	6	1	900	101.052	6.16		8		6
FALSE	High	Master Protein	Q96T37	Putative RNA-binding protein 15 OS=Homo sapiens GN=RBM15 PE=1 SV=2	0	17.4246	7.98362	7	7	7	1	977	107.124	10.08		7		7
FALSE	High	Master Protein	O96007	Molybdopterin synthase catalytic subunit OS=Homo sapiens GN=MOCS2 PE=1 SV=1	0.000607903	5.46471	7.97872	1	1	1	1	188	20.931	5.44		1		1
FALSE	High	Master Protein	Q6P087	RNA pseudouridylate synthase domain-containing protein 3 OS=Homo sapiens GN=RPUSD3 PE=1 SV=3	0.000607903	5.0441	7.97721	2	2	2	1	351	38.437	10.32		2		2
FALSE	High	Master Protein	Q92783	Signal transducing adapter molecule 1 OS=Homo sapiens GN=STAM PE=1 SV=3	0	7.4734	7.96296	3	4	3	1	540	59.142	4.82		4		3
FALSE	High	Master Protein	Q13907	Isopentenyl-diphosphate Delta-isomerase 1 OS=Homo sapiens GN=IDI1 PE=1 SV=2	0.000607903	5.24404	7.92952	2	2	2	1	227	26.302	6.34		2		2
FALSE	Medium	Master Protein	Q6QNY0	Biogenesis of lysosome-related organelles complex 1 subunit 3 OS=Homo sapiens GN=BLOC1S3 PE=1 SV=1	0.0144695	1.82449	7.92079	1	1	1	1	202	21.243	5.15		1		1
FALSE	High	Master Protein	O43847	Nardilysin OS=Homo sapiens GN=NRD1 PE=1 SV=2	0	18.9577	7.91304	8	10	8	1	1150	131.488	5		10		8
FALSE	High	Master Protein	Q9Y5Q8	General transcription factor 3C polypeptide 5 OS=Homo sapiens GN=GTF3C5 PE=1 SV=2	0	7.54794	7.89981	4	4	4	1	519	59.533	6.9		4		4
FALSE	High	Master Protein	O95782	AP-2 complex subunit alpha-1 OS=Homo sapiens GN=AP2A1 PE=1 SV=3	0	16.9158	7.88127	7	7	6	1	977	107.478	7.03		7		7
FALSE	High	Master Protein	P30419	Glycylpeptide N-tetradecanoyltransferase 1 OS=Homo sapiens GN=NMT1 PE=1 SV=2	0	9.83589	7.8629	3	3	3	1	496	56.77	7.8		3		3
FALSE	High	Master Protein	Q8TBX8	Phosphatidylinositol 5-phosphate 4-kinase type-2 gamma OS=Homo sapiens GN=PIP4K2C PE=1 SV=3	0	7.64696	7.83848	2	2	2	1	421	47.27	6.84		2		2
FALSE	High	Master Protein	Q13177	Serine/threonine-protein kinase PAK 2 OS=Homo sapiens GN=PAK2 PE=1 SV=3	0	6.74102	7.82443	3	3	3	1	524	58.006	5.96		3		3
FALSE	High	Master Protein	Q9NYB9	Abl interactor 2 OS=Homo sapiens GN=ABI2 PE=1 SV=1	0	6.8977	7.79727	3	3	2	1	513	55.629	6.16		3		3
FALSE	High	Master Protein	Q96KG9	N-terminal kinase-like protein OS=Homo sapiens GN=SCYL1 PE=1 SV=1	0	13.1209	7.79703	6	6	6	1	808	89.575	6.3		6		6
FALSE	Medium	Master Protein	Q9Y3C8	Ubiquitin-fold modifier-conjugating enzyme 1 OS=Homo sapiens GN=UFC1 PE=1 SV=3	0.0121753	1.88174	7.78443	1	1	1	1	167	19.446	7.4		1		1
FALSE	High	Master Protein	Q96EE3	Nucleoporin SEH1 OS=Homo sapiens GN=SEH1L PE=1 SV=3	0	7.17221	7.77778	2	2	2	1	360	39.623	8.09		2		2
FALSE	High	Master Protein	Q9HBK9	Arsenite methyltransferase OS=Homo sapiens GN=AS3MT PE=1 SV=3	0	11.5847	7.73333	3	3	3	1	375	41.721	6.2		3		3
FALSE	High	Master Protein	Q9UIA9	Exportin-7 OS=Homo sapiens GN=XPO7 PE=1 SV=3	0	23.1559	7.72769	8	8	8	1	1087	123.828	6.32		8		8
FALSE	High	Master Protein	Q9Y673	Dolichyl-phosphate beta-glucosyltransferase OS=Homo sapiens GN=ALG5 PE=1 SV=1	0.00158144	3.96157	7.71605	2	2	2	1	324	36.922	9.28		2		2
FALSE	High	Master Protein	P36551	Oxygen-dependent coproporphyrinogen-III oxidase, mitochondrial OS=Homo sapiens GN=CPOX PE=1 SV=3	0	7.76321	7.70925	3	3	3	1	454	50.12	8.25		3		3
FALSE	High	Master Protein	Q9Y4C2	TRPM8 channel-associated factor 1 OS=Homo sapiens GN=TCAF1 PE=1 SV=3	0	18.0887	7.70901	7	8	7	1	921	102.061	6.54		8		7
FALSE	High	Master Protein	P12955	Xaa-Pro dipeptidase OS=Homo sapiens GN=PEPD PE=1 SV=3	0	9.79186	7.70791	4	4	4	1	493	54.513	6		4		4
FALSE	High	Master Protein	P49006	MARCKS-related protein OS=Homo sapiens GN=MARCKSL1 PE=1 SV=2	0.00202122	3.18349	7.69231	1	1	1	1	195	19.517	4.67		1		1
FALSE	High	Master Protein	Q7Z739	YTH domain-containing family protein 3 OS=Homo sapiens GN=YTHDF3 PE=1 SV=1	0	15.9304	7.69231	4	7	2	1	585	63.822	9.04		7		4
FALSE	High	Master Protein	O75792	Ribonuclease H2 subunit A OS=Homo sapiens GN=RNASEH2A PE=1 SV=2	0.000607903	4.62212	7.69231	2	2	2	1	299	33.374	5.25		2		2
FALSE	High	Master Protein	Q96GM8	Target of EGR1 protein 1 OS=Homo sapiens GN=TOE1 PE=1 SV=1	0.000607903	6.67309	7.64706	3	3	3	1	510	56.512	7.18		3		3
FALSE	High	Master Protein	Q9HCC0	Methylcrotonoyl-CoA carboxylase beta chain, mitochondrial OS=Homo sapiens GN=MCCC2 PE=1 SV=1	0	7.3441	7.63766	3	3	3	1	563	61.294	7.68		3		3
FALSE	High	Master Protein	O00159	Unconventional myosin-Ic OS=Homo sapiens GN=MYO1C PE=1 SV=4	0	16.8446	7.61994	6	6	6	1	1063	121.606	9.41		6		6
FALSE	High	Master Protein	Q96EP5	DAZ-associated protein 1 OS=Homo sapiens GN=DAZAP1 PE=1 SV=1	0.000607903	5.65459	7.61671	2	2	2	1	407	43.356	8.56		2		2
FALSE	High	Master Protein	Q9Y2S7	Polymerase delta-interacting protein 2 OS=Homo sapiens GN=POLDIP2 PE=1 SV=1	0	7.47764	7.6087	2	2	2	1	368	42.007	8.63		2		2
FALSE	High	Master Protein	Q96QD9	UAP56-interacting factor OS=Homo sapiens GN=FYTTD1 PE=1 SV=3	0.00158144	4.00194	7.54717	2	2	2	1	318	35.796	11.78		2		2
FALSE	High	Master Protein	A0AVT1	Ubiquitin-like modifier-activating enzyme 6 OS=Homo sapiens GN=UBA6 PE=1 SV=1	0	18.3695	7.50951	7	7	7	1	1052	117.895	6.14		7		7
FALSE	High	Master Protein	Q9NZL9	Methionine adenosyltransferase 2 subunit beta OS=Homo sapiens GN=MAT2B PE=1 SV=1	0.000607903	6.39628	7.48503	2	2	2	1	334	37.528	7.36		2		2
FALSE	High	Master Protein	P06748	Nucleophosmin OS=Homo sapiens GN=NPM1 PE=1 SV=2	0.000607903	5.17128	7.48299	2	2	2	1	294	32.555	4.78		2		2
FALSE	High	Master Protein	P53701	Cytochrome c-type heme lyase OS=Homo sapiens GN=HCCS PE=1 SV=1	0.000607903	5.34805	7.46269	2	2	2	1	268	30.582	6.68		2		2
FALSE	Medium	Master Protein	P49721	Proteasome subunit beta type-2 OS=Homo sapiens GN=PSMB2 PE=1 SV=1	0.0473984	1.27786	7.46269	1	1	1	1	201	22.822	7.02		1		1
FALSE	High	Master Protein	P50453	Serpin B9 OS=Homo sapiens GN=SERPINB9 PE=1 SV=1	0.000607903	6.3891	7.44681	3	3	3	1	376	42.376	5.86		3		3
FALSE	High	Master Protein	P29558	RNA-binding motif, single-stranded-interacting protein 1 OS=Homo sapiens GN=RBMS1 PE=1 SV=3	0	6.80379	7.38916	2	2	2	1	406	44.477	8.79		2		2
FALSE	High	Master Protein	Q96EY4	Translation machinery-associated protein 16 OS=Homo sapiens GN=TMA16 PE=1 SV=2	0.00202122	3.24972	7.38916	1	1	1	1	203	23.849	9.26		1		1
FALSE	High	Master Protein	P78344	Eukaryotic translation initiation factor 4 gamma 2 OS=Homo sapiens GN=EIF4G2 PE=1 SV=1	0	13.9894	7.38699	6	6	6	1	907	102.297	7.14		6		6
FALSE	High	Master Protein	P08754	Guanine nucleotide-binding protein G(k) subunit alpha OS=Homo sapiens GN=GNAI3 PE=1 SV=3	0.000607903	5.25244	7.34463	2	3	1	1	354	40.506	5.69		3		2
FALSE	High	Master Protein	Q86X76	Nitrilase homolog 1 OS=Homo sapiens GN=NIT1 PE=1 SV=2	0.000607903	5.78744	7.33945	3	3	3	1	327	35.873	7.74		3		3
FALSE	High	Master Protein	Q13045	Protein flightless-1 homolog OS=Homo sapiens GN=FLII PE=1 SV=2	0	21.4683	7.32861	8	8	8	1	1269	144.659	6.05		8		8
FALSE	High	Master Protein	Q01844	RNA-binding protein EWS OS=Homo sapiens GN=EWSR1 PE=1 SV=1	0	7.53003	7.31707	3	3	3	1	656	68.436	9.33		3		3
FALSE	High	Master Protein	Q96SK2	Transmembrane protein 209 OS=Homo sapiens GN=TMEM209 PE=1 SV=2	0.000607903	5.78935	7.30838	2	2	2	1	561	62.881	8.63		2		2
FALSE	High	Master Protein	O14618	Copper chaperone for superoxide dismutase OS=Homo sapiens GN=CCS PE=1 SV=1	0	7.17583	7.29927	2	2	2	1	274	29.022	5.58		2		2
FALSE	High	Master Protein	P53350	Serine/threonine-protein kinase PLK1 OS=Homo sapiens GN=PLK1 PE=1 SV=1	0	10.4995	7.29685	3	3	3	1	603	68.212	8.91		3		3
FALSE	High	Master Protein	P11233	Ras-related protein Ral-A OS=Homo sapiens GN=RALA PE=1 SV=1	0.00202122	3.38101	7.28155	1	1	1	1	206	23.552	7.11		1		1
FALSE	High	Master Protein	P12931	Proto-oncogene tyrosine-protein kinase Src OS=Homo sapiens GN=SRC PE=1 SV=3	0	9.37131	7.27612	3	3	3	1	536	59.797	7.42		3		3
FALSE	High	Master Protein	Q15813	Tubulin-specific chaperone E OS=Homo sapiens GN=TBCE PE=1 SV=1	0	11.2499	7.21063	4	5	4	1	527	59.309	6.76		5		4
FALSE	High	Master Protein	O96008	Mitochondrial import receptor subunit TOM40 homolog OS=Homo sapiens GN=TOMM40 PE=1 SV=1	0.000607903	4.55377	7.20222	2	2	2	1	361	37.869	7.25		2		2
FALSE	High	Master Protein	Q13442	28 kDa heat- and acid-stable phosphoprotein OS=Homo sapiens GN=PDAP1 PE=1 SV=1	0.00158144	4.07422	7.18232	1	1	1	1	181	20.618	8.87		1		1
FALSE	High	Master Protein	Q9Y490	Talin-1 OS=Homo sapiens GN=TLN1 PE=1 SV=3	0	37.0688	7.16253	14	14	14	1	2541	269.599	6.07		14		14
FALSE	High	Master Protein	Q13546	Receptor-interacting serine/threonine-protein kinase 1 OS=Homo sapiens GN=RIPK1 PE=1 SV=3	0	9.57773	7.1535	4	4	4	1	671	75.883	6.33		4		4
FALSE	High	Master Protein	Q9UHD2	Serine/threonine-protein kinase TBK1 OS=Homo sapiens GN=TBK1 PE=1 SV=1	0	9.90785	7.13306	4	4	4	1	729	83.589	6.79		4		4
FALSE	High	Master Protein	Q96CW1	AP-2 complex subunit mu OS=Homo sapiens GN=AP2M1 PE=1 SV=2	0	8.05755	7.12644	3	3	3	1	435	49.623	9.54		3		3
FALSE	High	Master Protein	O15226	NF-kappa-B-repressing factor OS=Homo sapiens GN=NKRF PE=1 SV=2	0	10.1312	7.10145	5	5	5	1	690	77.624	8.79		5		5
FALSE	High	Master Protein	Q16658	Fascin OS=Homo sapiens GN=FSCN1 PE=1 SV=3	0	12.6353	7.09939	3	4	3	1	493	54.496	7.24		4		3
FALSE	High	Master Protein	P27824	Calnexin OS=Homo sapiens GN=CANX PE=1 SV=2	0	8.81262	7.09459	3	3	3	1	592	67.526	4.6		3		3
FALSE	High	Master Protein	O94905	Erlin-2 OS=Homo sapiens GN=ERLIN2 PE=1 SV=1	0	6.99159	7.07965	2	2	2	1	339	37.815	5.62		2		2
FALSE	High	Master Protein	P14550	Alcohol dehydrogenase [NADP(+)] OS=Homo sapiens GN=AKR1A1 PE=1 SV=3	0.000607903	4.68862	7.07692	2	2	2	1	325	36.55	6.79		2		2
FALSE	High	Master Protein	P0CG12	Chromosome transmission fidelity protein 8 homolog isoform 2 OS=Homo sapiens GN=CHTF8 PE=1 SV=1	0.000607903	6.35698	7.06107	3	3	3	1	524	51.359	12.41		3		3
FALSE	High	Master Protein	O94808	Glutamine--fructose-6-phosphate aminotransferase [isomerizing] 2 OS=Homo sapiens GN=GFPT2 PE=1 SV=3	0	8.51213	7.03812	4	6	1	1	682	76.882	7.37		6		4
FALSE	High	Master Protein	Q7L5N1	COP9 signalosome complex subunit 6 OS=Homo sapiens GN=COPS6 PE=1 SV=1	0.00158144	4.26357	7.03364	2	2	2	1	327	36.14	5.73		2		2
FALSE	High	Master Protein	Q16626	Male-enhanced antigen 1 OS=Homo sapiens GN=MEA1 PE=1 SV=2	0.000607903	4.53047	7.02703	1	1	1	1	185	19.892	4.22		1		1
FALSE	High	Master Protein	Q9P289	Serine/threonine-protein kinase 26 OS=Homo sapiens GN=STK26 PE=1 SV=2	0	9.24851	6.97115	3	3	3	1	416	46.5	5.29		3		3
FALSE	High	Master Protein	Q96DG6	Carboxymethylenebutenolidase homolog OS=Homo sapiens GN=CMBL PE=1 SV=1	0.000607903	4.91391	6.93878	2	2	2	1	245	28.03	7.18		2		2
FALSE	High	Master Protein	P42224	Signal transducer and activator of transcription 1-alpha/beta OS=Homo sapiens GN=STAT1 PE=1 SV=2	0	11.7235	6.93333	4	4	4	1	750	87.28	6.05		4		4
FALSE	High	Master Protein	Q9UNE7	E3 ubiquitin-protein ligase CHIP OS=Homo sapiens GN=STUB1 PE=1 SV=2	0.000607903	4.48751	6.93069	2	2	2	1	303	34.834	5.87		2		2
FALSE	High	Master Protein	Q13564	NEDD8-activating enzyme E1 regulatory subunit OS=Homo sapiens GN=NAE1 PE=1 SV=1	0	8.17939	6.92884	3	3	3	1	534	60.209	5.4		3		3
FALSE	High	Master Protein	Q9UNM6	26S proteasome non-ATPase regulatory subunit 13 OS=Homo sapiens GN=PSMD13 PE=1 SV=2	0.00158144	4.23333	6.91489	2	2	2	1	376	42.918	5.81		2		2
FALSE	High	Master Protein	Q9BY42	Protein RTF2 homolog OS=Homo sapiens GN=RTFDC1 PE=1 SV=3	0.000607903	5.21817	6.86275	2	2	2	1	306	33.865	8.59		2		2
FALSE	High	Master Protein	Q5JTV8	Torsin-1A-interacting protein 1 OS=Homo sapiens GN=TOR1AIP1 PE=1 SV=2	0	6.85547	6.86106	3	3	3	1	583	66.208	8.18		3		3
FALSE	High	Master Protein	Q4V339	COBW domain-containing protein 6 OS=Homo sapiens GN=CBWD6 PE=3 SV=1	0	8.94823	6.83544	2	2	2	1	395	43.937	4.87		2		2
FALSE	High	Master Protein	Q6P4A7	Sideroflexin-4 OS=Homo sapiens GN=SFXN4 PE=1 SV=1	0.000607903	6.67306	6.82493	2	2	2	1	337	37.974	9.19		2		2
FALSE	High	Master Protein	Q8IXI1	Mitochondrial Rho GTPase 2 OS=Homo sapiens GN=RHOT2 PE=1 SV=2	0	9.17017	6.79612	3	3	3	1	618	68.075	5.86		3		3
FALSE	High	Master Protein	P00966	Argininosuccinate synthase OS=Homo sapiens GN=ASS1 PE=1 SV=2	0	7.55775	6.79612	3	3	3	1	412	46.501	8.02		3		3
FALSE	High	Master Protein	Q9Y263	Phospholipase A-2-activating protein OS=Homo sapiens GN=PLAA PE=1 SV=2	0	8.75404	6.79245	3	4	3	1	795	87.101	6.37		4		3
FALSE	High	Master Protein	P54920	Alpha-soluble NSF attachment protein OS=Homo sapiens GN=NAPA PE=1 SV=3	0.00158144	4.17953	6.77966	2	2	2	1	295	33.211	5.36		2		2
FALSE	High	Master Protein	Q14168	MAGUK p55 subfamily member 2 OS=Homo sapiens GN=MPP2 PE=1 SV=3	0	9.07258	6.77083	3	3	2	1	576	64.54	6.77		3		3
FALSE	High	Master Protein	Q9Y617	Phosphoserine aminotransferase OS=Homo sapiens GN=PSAT1 PE=1 SV=2	0.000607903	6.40822	6.75676	2	2	2	1	370	40.397	7.66		2		2
FALSE	High	Master Protein	O75312	Zinc finger protein ZPR1 OS=Homo sapiens GN=ZPR1 PE=1 SV=1	0	8.85772	6.75381	3	5	3	1	459	50.893	4.73		5		3
FALSE	High	Master Protein	Q9BXK1	Krueppel-like factor 16 OS=Homo sapiens GN=KLF16 PE=1 SV=1	0.00158144	3.40771	6.74603	1	1	1	1	252	25.415	9.88		1		1
FALSE	High	Master Protein	Q13057	Bifunctional coenzyme A synthase OS=Homo sapiens GN=COASY PE=1 SV=4	0	6.9215	6.73759	3	3	3	1	564	62.29	6.99		3		3
FALSE	High	Master Protein	P23490	Loricrin OS=Homo sapiens GN=LOR PE=1 SV=2	0.000607903	4.50962	6.73077	2	2	2	1	312	25.744	8.09		2		2
FALSE	High	Master Protein	Q9Y5K5	Ubiquitin carboxyl-terminal hydrolase isozyme L5 OS=Homo sapiens GN=UCHL5 PE=1 SV=3	0.000607903	4.63585	6.68693	2	2	2	1	329	37.583	5.33		2		2
FALSE	High	Master Protein	Q96Q11	CCA tRNA nucleotidyltransferase 1, mitochondrial OS=Homo sapiens GN=TRNT1 PE=1 SV=2	0.00202122	3.27467	6.68203	2	2	2	1	434	50.096	8.1		2		2
FALSE	High	Master Protein	O94874	E3 UFM1-protein ligase 1 OS=Homo sapiens GN=UFL1 PE=1 SV=2	0	10.5879	6.67506	5	5	5	1	794	89.54	6.79		5		5
FALSE	High	Master Protein	Q13425	Beta-2-syntrophin OS=Homo sapiens GN=SNTB2 PE=1 SV=1	0	8.04203	6.66667	3	3	3	1	540	57.913	8.82		3		3
FALSE	High	Master Protein	O43852	Calumenin OS=Homo sapiens GN=CALU PE=1 SV=2	0.000607903	5.34841	6.66667	2	2	2	1	315	37.084	4.64		2		2
FALSE	High	Master Protein	Q9NQX3	Gephyrin OS=Homo sapiens GN=GPHN PE=1 SV=1	0	10.3375	6.65761	4	4	4	1	736	79.698	5.43		4		4
FALSE	High	Master Protein	P27694	Replication protein A 70 kDa DNA-binding subunit OS=Homo sapiens GN=RPA1 PE=1 SV=2	0	7.64122	6.65584	4	4	4	1	616	68.095	7.21		4		4
FALSE	High	Master Protein	Q10567	AP-1 complex subunit beta-1 OS=Homo sapiens GN=AP1B1 PE=1 SV=2	0	11.029	6.63857	6	7	6	1	949	104.57	5.06		7		6
FALSE	High	Master Protein	Q9BXS5	AP-1 complex subunit mu-1 OS=Homo sapiens GN=AP1M1 PE=1 SV=3	0.00158144	3.91072	6.61939	2	2	2	1	423	48.556	7.3		2		2
FALSE	High	Master Protein	Q9H6T3	RNA polymerase II-associated protein 3 OS=Homo sapiens GN=RPAP3 PE=1 SV=2	0	11.0586	6.61654	4	4	4	1	665	75.672	6.84		4		4
FALSE	High	Master Protein	P54252	Ataxin-3 OS=Homo sapiens GN=ATXN3 PE=1 SV=4	0.00120192	4.44973	6.59341	2	2	2	1	364	41.754	4.91		2		2
FALSE	High	Master Protein	Q8TDD1	ATP-dependent RNA helicase DDX54 OS=Homo sapiens GN=DDX54 PE=1 SV=2	0	11.7924	6.58343	5	5	5	1	881	98.534	10.02		5		5
FALSE	High	Master Protein	Q12972	Nuclear inhibitor of protein phosphatase 1 OS=Homo sapiens GN=PPP1R8 PE=1 SV=2	0	7.87637	6.55271	2	2	2	1	351	38.455	7.37		2		2
FALSE	High	Master Protein	O43761	Synaptogyrin-3 OS=Homo sapiens GN=SYNGR3 PE=1 SV=2	0.00202122	3.13703	6.55022	1	1	1	1	229	24.539	8.18		1		1
FALSE	High	Master Protein	O95758	Polypyrimidine tract-binding protein 3 OS=Homo sapiens GN=PTBP3 PE=1 SV=2	0.000607903	6.4726	6.52174	3	3	1	1	552	59.652	9.04		3		3
FALSE	High	Master Protein	Q92615	La-related protein 4B OS=Homo sapiens GN=LARP4B PE=1 SV=3	0	12.3137	6.50407	4	6	4	1	738	80.503	6.92		6		4
FALSE	High	Master Protein	Q9NRF8	CTP synthase 2 OS=Homo sapiens GN=CTPS2 PE=1 SV=1	0	10.3939	6.48464	3	4	2	1	586	65.636	6.9		4		3
FALSE	High	Master Protein	Q8WUK0	Phosphatidylglycerophosphatase and protein-tyrosine phosphatase 1 OS=Homo sapiens GN=PTPMT1 PE=1 SV=1	0.00158144	4.30321	6.46766	1	1	1	1	201	22.829	9.77		1		1
FALSE	Medium	Master Protein	Q14192	Four and a half LIM domains protein 2 OS=Homo sapiens GN=FHL2 PE=1 SV=3	0.0456817	1.30173	6.45161	1	1	1	1	279	32.171	7.55		1		1
FALSE	High	Master Protein	O95817	BAG family molecular chaperone regulator 3 OS=Homo sapiens GN=BAG3 PE=1 SV=3	0	10.6824	6.43478	3	3	3	1	575	61.557	6.95		3		3
FALSE	High	Master Protein	Q9Y5Q9	General transcription factor 3C polypeptide 3 OS=Homo sapiens GN=GTF3C3 PE=1 SV=1	0	13.1562	6.43341	5	5	5	1	886	101.208	5.07		5		5
FALSE	High	Master Protein	P17655	Calpain-2 catalytic subunit OS=Homo sapiens GN=CAPN2 PE=1 SV=6	0	11.4577	6.42857	4	4	4	1	700	79.945	4.98		4		4
FALSE	High	Master Protein	Q9Y6W5	Wiskott-Aldrich syndrome protein family member 2 OS=Homo sapiens GN=WASF2 PE=1 SV=3	0.000607903	6.48955	6.4257	2	2	2	1	498	54.25	5.53		2		2
FALSE	High	Master Protein	O43929	Origin recognition complex subunit 4 OS=Homo sapiens GN=ORC4 PE=1 SV=2	0.000607903	5.28442	6.42202	2	2	2	1	436	50.345	8		2		2
FALSE	High	Master Protein	Q9Y2A7	Nck-associated protein 1 OS=Homo sapiens GN=NCKAP1 PE=1 SV=1	0	16.5412	6.38298	6	6	6	1	1128	128.707	6.62		6		6
FALSE	High	Master Protein	P09960	Leukotriene A-4 hydrolase OS=Homo sapiens GN=LTA4H PE=1 SV=2	0.000607903	6.56368	6.38298	3	4	3	1	611	69.241	6.18		4		3
FALSE	High	Master Protein	Q5TFE4	5'-nucleotidase domain-containing protein 1 OS=Homo sapiens GN=NT5DC1 PE=1 SV=1	0	8.18322	6.37363	3	3	3	1	455	51.812	6.35		3		3
FALSE	High	Master Protein	Q7Z4H3	HD domain-containing protein 2 OS=Homo sapiens GN=HDDC2 PE=1 SV=1	0.00250878	3.00078	6.37255	1	1	1	1	204	23.376	5.49		1		1
FALSE	High	Master Protein	Q9NQ48	Leucine zipper transcription factor-like protein 1 OS=Homo sapiens GN=LZTFL1 PE=1 SV=1	0.00456413	2.62397	6.35452	1	1	1	1	299	34.571	5.36		1		1
FALSE	High	Master Protein	Q69YN2	CWF19-like protein 1 OS=Homo sapiens GN=CWF19L1 PE=1 SV=2	0	8.72773	6.3197	3	3	3	1	538	60.581	7.24		3		3
FALSE	High	Master Protein	Q9H4A4	Aminopeptidase B OS=Homo sapiens GN=RNPEP PE=1 SV=2	0	9.43589	6.30769	3	3	3	1	650	72.549	5.74		3		3
FALSE	High	Master Protein	Q9Y4X0	AMME syndrome candidate gene 1 protein OS=Homo sapiens GN=AMMECR1 PE=1 SV=1	0.000607903	5.82207	6.30631	2	2	2	1	333	35.44	8.63		2		2
FALSE	High	Master Protein	Q9H5V9	UPF0428 protein CXorf56 OS=Homo sapiens GN=CXorf56 PE=1 SV=1	0.00765632	2.21474	6.30631	1	1	1	1	222	25.608	8.73		1		1
FALSE	High	Master Protein	O96019	Actin-like protein 6A OS=Homo sapiens GN=ACTL6A PE=1 SV=1	0.000607903	6.21631	6.29371	2	2	2	1	429	47.43	5.6		2		2
FALSE	High	Master Protein	O75874	Isocitrate dehydrogenase [NADP] cytoplasmic OS=Homo sapiens GN=IDH1 PE=1 SV=2	0.000607903	5.3397	6.28019	2	3	2	1	414	46.63	7.01		3		2
FALSE	High	Master Protein	Q9UL46	Proteasome activator complex subunit 2 OS=Homo sapiens GN=PSME2 PE=1 SV=4	0.000607903	5.36906	6.27615	1	1	1	1	239	27.384	5.73		1		1
FALSE	High	Master Protein	P35637	RNA-binding protein FUS OS=Homo sapiens GN=FUS PE=1 SV=1	0	9.68522	6.27376	3	5	3	1	526	53.394	9.36		5		3
FALSE	High	Master Protein	Q9H444	Charged multivesicular body protein 4b OS=Homo sapiens GN=CHMP4B PE=1 SV=1	0.00158144	4.03311	6.25	1	1	1	1	224	24.935	4.82		1		1
FALSE	Medium	Master Protein	Q86WR0	Coiled-coil domain-containing protein 25 OS=Homo sapiens GN=CCDC25 PE=1 SV=2	0.0378676	1.41805	6.25	1	1	1	1	208	24.463	6.8		1		1
FALSE	High	Master Protein	P00491	Purine nucleoside phosphorylase OS=Homo sapiens GN=PNP PE=1 SV=2	0.000607903	4.48772	6.22837	1	1	1	1	289	32.097	6.95		1		1
FALSE	High	Master Protein	Q99755	Phosphatidylinositol 4-phosphate 5-kinase type-1 alpha OS=Homo sapiens GN=PIP5K1A PE=1 SV=1	0	6.72989	6.22776	2	2	2	1	562	62.594	8.21		2		2
FALSE	High	Master Protein	Q9UN86	Ras GTPase-activating protein-binding protein 2 OS=Homo sapiens GN=G3BP2 PE=1 SV=2	0	9.2078	6.22407	2	3	2	1	482	54.088	5.55		3		2
FALSE	High	Master Protein	Q00653	Nuclear factor NF-kappa-B p100 subunit OS=Homo sapiens GN=NFKB2 PE=1 SV=4	0	11.4823	6.22222	5	5	4	1	900	96.689	6.25		5		5
FALSE	High	Master Protein	Q12929	Epidermal growth factor receptor kinase substrate 8 OS=Homo sapiens GN=EPS8 PE=1 SV=1	0	10.1088	6.20438	4	4	4	1	822	91.824	7.5		4		4
FALSE	High	Master Protein	P31350	Ribonucleoside-diphosphate reductase subunit M2 OS=Homo sapiens GN=RRM2 PE=1 SV=1	0	8.68732	6.16967	2	2	2	1	389	44.849	5.38		2		2
FALSE	High	Master Protein	Q9BSF4	Uncharacterized protein C19orf52 OS=Homo sapiens GN=C19orf52 PE=1 SV=2	0.00158144	3.7986	6.15385	1	1	1	1	260	29.215	8.09		1		1
FALSE	High	Master Protein	Q15404	Ras suppressor protein 1 OS=Homo sapiens GN=RSU1 PE=1 SV=3	0.00299401	2.98422	6.13718	1	1	1	1	277	31.521	8.65		1		1
FALSE	High	Master Protein	Q13596	Sorting nexin-1 OS=Homo sapiens GN=SNX1 PE=1 SV=3	0	8.41965	6.13027	3	3	2	1	522	59.033	5.15		3		3
FALSE	High	Master Protein	Q9Y4X5	E3 ubiquitin-protein ligase ARIH1 OS=Homo sapiens GN=ARIH1 PE=1 SV=2	0	7.72288	6.10413	3	3	3	1	557	64.076	5.08		3		3
FALSE	High	Master Protein	Q9H6R7	WD repeat and coiled-coil-containing protein C2orf44 OS=Homo sapiens GN=C2orf44 PE=1 SV=1	0	7.64985	6.10264	4	4	4	1	721	79.086	6.7		4		4
FALSE	Medium	Master Protein	Q86U90	YrdC domain-containing protein, mitochondrial OS=Homo sapiens GN=YRDC PE=1 SV=1	0.0431655	1.32975	6.09319	1	1	1	1	279	29.309	8.57		1		1
FALSE	High	Master Protein	O95376	E3 ubiquitin-protein ligase ARIH2 OS=Homo sapiens GN=ARIH2 PE=1 SV=1	0	9.25449	6.08519	3	3	3	1	493	57.781	5.63		3		3
FALSE	High	Master Protein	O75351	Vacuolar protein sorting-associated protein 4B OS=Homo sapiens GN=VPS4B PE=1 SV=2	0.00158144	4.21258	6.08108	2	2	2	1	444	49.271	7.23		2		2
FALSE	High	Master Protein	Q9P035	Very-long-chain (3R)-3-hydroxyacyl-CoA dehydratase 3 OS=Homo sapiens GN=HACD3 PE=1 SV=2	0.000607903	4.74639	6.07735	2	3	2	1	362	43.132	8.94		3		2
FALSE	High	Master Protein	Q13643	Four and a half LIM domains protein 3 OS=Homo sapiens GN=FHL3 PE=1 SV=4	0.00740741	2.36522	6.07143	1	1	1	1	280	31.171	6.2		1		1
FALSE	High	Master Protein	Q9H8M7	Protein FAM188A OS=Homo sapiens GN=FAM188A PE=1 SV=1	0.000607903	6.13378	6.06742	2	2	2	1	445	49.693	4.77		2		2
FALSE	High	Master Protein	P36405	ADP-ribosylation factor-like protein 3 OS=Homo sapiens GN=ARL3 PE=1 SV=2	0.00158144	3.4201	6.04396	1	1	1	1	182	20.443	7.24		1		1
FALSE	High	Master Protein	Q04864	Proto-oncogene c-Rel OS=Homo sapiens GN=REL PE=1 SV=1	0.000607903	6.46574	5.97738	3	3	2	1	619	68.476	5.86		3		3
FALSE	High	Master Protein	Q8IYS1	Peptidase M20 domain-containing protein 2 OS=Homo sapiens GN=PM20D2 PE=1 SV=2	0.00120192	4.42962	5.9633	2	2	2	1	436	47.746	5.85		2		2
FALSE	High	Master Protein	Q99543	DnaJ homolog subfamily C member 2 OS=Homo sapiens GN=DNAJC2 PE=1 SV=4	0.000607903	5.34096	5.95813	3	3	3	1	621	71.952	8.7		3		3
FALSE	High	Master Protein	P08758	Annexin A5 OS=Homo sapiens GN=ANXA5 PE=1 SV=2	0.00120192	4.47107	5.9375	2	2	2	1	320	35.914	5.05		2		2
FALSE	High	Master Protein	P48729	Casein kinase I isoform alpha OS=Homo sapiens GN=CSNK1A1 PE=1 SV=2	0.00158144	4.2189	5.93472	2	2	2	1	337	38.89	9.57		2		2
FALSE	High	Master Protein	Q9NZW5	MAGUK p55 subfamily member 6 OS=Homo sapiens GN=MPP6 PE=1 SV=2	0	7.26933	5.92593	3	3	2	1	540	61.079	6.18		3		3
FALSE	High	Master Protein	P48147	Prolyl endopeptidase OS=Homo sapiens GN=PREP PE=1 SV=2	0	9.73507	5.91549	3	3	3	1	710	80.648	5.86		3		3
FALSE	High	Master Protein	P51617	Interleukin-1 receptor-associated kinase 1 OS=Homo sapiens GN=IRAK1 PE=1 SV=2	0	11.8407	5.89888	5	5	5	1	712	76.489	6.62		5		5
FALSE	High	Master Protein	Q9UBB6	Neurochondrin OS=Homo sapiens GN=NCDN PE=1 SV=1	0	10.6479	5.89849	4	4	4	1	729	78.814	5.48		4		4
FALSE	High	Master Protein	Q9BTY7	Protein HGH1 homolog OS=Homo sapiens GN=HGH1 PE=1 SV=1	0.00158144	4.31987	5.89744	2	2	2	1	390	42.103	4.81		2		2
FALSE	High	Master Protein	P12081	Histidine--tRNA ligase, cytoplasmic OS=Homo sapiens GN=HARS PE=1 SV=2	0	8.25798	5.89391	3	3	3	1	509	57.374	5.88		3		3
FALSE	High	Master Protein	A8MXV4	Nucleoside diphosphate-linked moiety X motif 19, mitochondrial OS=Homo sapiens GN=NUDT19 PE=1 SV=1	0.00120192	4.43178	5.86667	2	2	2	1	375	42.207	7.64		2		2
FALSE	High	Master Protein	Q9BST9	Rhotekin OS=Homo sapiens GN=RTKN PE=1 SV=2	0.000607903	5.47828	5.86146	2	2	2	1	563	62.628	7.44		2		2
FALSE	High	Master Protein	Q96P70	Importin-9 OS=Homo sapiens GN=IPO9 PE=1 SV=3	0	13.5896	5.85975	6	6	6	1	1041	115.889	4.81		6		6
FALSE	High	Master Protein	Q86SE9	Polycomb group RING finger protein 5 OS=Homo sapiens GN=PCGF5 PE=1 SV=1	0.00202122	3.25228	5.85938	1	1	1	1	256	29.694	6.52		1		1
FALSE	High	Master Protein	Q96I15	Selenocysteine lyase OS=Homo sapiens GN=SCLY PE=1 SV=4	0.000607903	4.60787	5.8427	2	2	2	1	445	48.119	7.12		2		2
FALSE	High	Master Protein	P38606	V-type proton ATPase catalytic subunit A OS=Homo sapiens GN=ATP6V1A PE=1 SV=2	0.000607903	6.26905	5.83468	3	3	3	1	617	68.26	5.52		3		3
FALSE	High	Master Protein	Q9Y223	Bifunctional UDP-N-acetylglucosamine 2-epimerase/N-acetylmannosamine kinase OS=Homo sapiens GN=GNE PE=1 SV=1	0	9.51791	5.81717	3	3	3	1	722	79.224	6.8		3		3
FALSE	High	Master Protein	P10644	cAMP-dependent protein kinase type I-alpha regulatory subunit OS=Homo sapiens GN=PRKAR1A PE=1 SV=1	0.000607903	4.8046	5.77428	2	2	2	1	381	42.955	5.35		2		2
FALSE	Medium	Master Protein	Q96P16	Regulation of nuclear pre-mRNA domain-containing protein 1A OS=Homo sapiens GN=RPRD1A PE=1 SV=1	0.0257099	1.60924	5.76923	1	1	1	1	312	35.698	7.55		1		1
FALSE	High	Master Protein	Q5VVQ6	Ubiquitin thioesterase OTU1 OS=Homo sapiens GN=YOD1 PE=1 SV=1	0	7.66706	5.74713	2	2	2	1	348	38.298	6.11		2		2
FALSE	High	Master Protein	P23381	Tryptophan--tRNA ligase, cytoplasmic OS=Homo sapiens GN=WARS PE=1 SV=2	0	8.08834	5.73248	2	3	2	1	471	53.132	6.23		3		2
FALSE	High	Master Protein	P49321	Nuclear autoantigenic sperm protein OS=Homo sapiens GN=NASP PE=1 SV=2	0	9.71571	5.71066	3	3	3	1	788	85.186	4.3		3		3
FALSE	High	Master Protein	Q86X29	Lipolysis-stimulated lipoprotein receptor OS=Homo sapiens GN=LSR PE=1 SV=4	0	9.81081	5.70108	3	3	3	1	649	71.394	7.97		3		3
FALSE	High	Master Protein	P49756	RNA-binding protein 25 OS=Homo sapiens GN=RBM25 PE=1 SV=3	0	9.26058	5.69395	4	4	4	1	843	100.124	6.32		4		4
FALSE	High	Master Protein	O95747	Serine/threonine-protein kinase OSR1 OS=Homo sapiens GN=OXSR1 PE=1 SV=1	0.000607903	6.55227	5.6926	3	3	3	1	527	57.986	6.43		3		3
FALSE	High	Master Protein	Q9Y2R4	Probable ATP-dependent RNA helicase DDX52 OS=Homo sapiens GN=DDX52 PE=1 SV=3	0.000607903	4.8772	5.67613	3	4	3	1	599	67.456	9.67		4		3
FALSE	High	Master Protein	Q0PNE2	Elongator complex protein 6 OS=Homo sapiens GN=ELP6 PE=1 SV=1	0.00158144	3.97798	5.6391	1	1	1	1	266	29.774	6.84		1		1
FALSE	High	Master Protein	Q9Y217	Myotubularin-related protein 6 OS=Homo sapiens GN=MTMR6 PE=1 SV=3	0	7.42628	5.63607	3	4	3	1	621	71.922	7.66		4		3
FALSE	High	Master Protein	Q9H845	Acyl-CoA dehydrogenase family member 9, mitochondrial OS=Homo sapiens GN=ACAD9 PE=1 SV=1	0.00158144	3.777	5.63607	2	2	2	1	621	68.717	7.96		2		2
FALSE	Medium	Master Protein	Q06323	Proteasome activator complex subunit 1 OS=Homo sapiens GN=PSME1 PE=1 SV=1	0.023543	1.64092	5.62249	1	1	1	1	249	28.705	6.02		1		1
FALSE	High	Master Protein	P40926	Malate dehydrogenase, mitochondrial OS=Homo sapiens GN=MDH2 PE=1 SV=3	0.00342801	2.92922	5.6213	1	1	1	1	338	35.481	8.68		1		1
FALSE	High	Master Protein	Q8WWY3	U4/U6 small nuclear ribonucleoprotein Prp31 OS=Homo sapiens GN=PRPF31 PE=1 SV=2	0.000607903	5.06293	5.61122	2	2	2	1	499	55.421	5.78		2		2
FALSE	High	Master Protein	Q8IZ83	Aldehyde dehydrogenase family 16 member A1 OS=Homo sapiens GN=ALDH16A1 PE=1 SV=2	0.000607903	6.30333	5.61097	3	3	3	1	802	85.074	6.79		3		3
FALSE	High	Master Protein	P78346	Ribonuclease P protein subunit p30 OS=Homo sapiens GN=RPP30 PE=1 SV=1	0.00158144	3.71874	5.59701	1	1	1	1	268	29.303	8.91		1		1
FALSE	High	Master Protein	Q8WU79	Stromal membrane-associated protein 2 OS=Homo sapiens GN=SMAP2 PE=1 SV=1	0.000607903	6.11322	5.59441	2	4	2	1	429	46.755	8.87		4		2
FALSE	High	Master Protein	Q14344	Guanine nucleotide-binding protein subunit alpha-13 OS=Homo sapiens GN=GNA13 PE=1 SV=2	0.00158144	4.12965	5.57029	2	3	1	1	377	44.022	8		3		2
FALSE	High	Master Protein	Q16881	Thioredoxin reductase 1, cytoplasmic OS=Homo sapiens GN=TXNRD1 PE=1 SV=3	0	8.90613	5.547	3	3	3	1	649	70.862	7.39		3		3
FALSE	High	Master Protein	Q9BXJ9	N-alpha-acetyltransferase 15, NatA auxiliary subunit OS=Homo sapiens GN=NAA15 PE=1 SV=1	0	11.1518	5.54273	5	7	5	1	866	101.208	7.42		7		5
FALSE	High	Master Protein	O94973	AP-2 complex subunit alpha-2 OS=Homo sapiens GN=AP2A2 PE=1 SV=2	0	10.7034	5.53781	5	5	4	1	939	103.895	6.96		5		5
FALSE	High	Master Protein	Q6DKJ4	Nucleoredoxin OS=Homo sapiens GN=NXN PE=1 SV=2	0.00158144	3.5784	5.51724	1	1	1	1	435	48.362	4.97		1		1
FALSE	High	Master Protein	Q05397	Focal adhesion kinase 1 OS=Homo sapiens GN=PTK2 PE=1 SV=2	0	14.1171	5.51331	6	7	6	1	1052	119.157	6.62		7		6
FALSE	High	Master Protein	O14733	Dual specificity mitogen-activated protein kinase kinase 7 OS=Homo sapiens GN=MAP2K7 PE=1 SV=2	0	7.15377	5.48926	2	2	2	1	419	47.455	9.16		2		2
FALSE	High	Master Protein	P62191	26S protease regulatory subunit 4 OS=Homo sapiens GN=PSMC1 PE=1 SV=1	0.000607903	4.87276	5.45455	2	2	1	1	440	49.154	6.21		2		2
FALSE	High	Master Protein	P50479	PDZ and LIM domain protein 4 OS=Homo sapiens GN=PDLIM4 PE=1 SV=2	0.00158144	3.58835	5.45455	2	4	2	1	330	35.376	7.91		4		2
FALSE	High	Master Protein	Q9BQ52	Zinc phosphodiesterase ELAC protein 2 OS=Homo sapiens GN=ELAC2 PE=1 SV=2	0	9.30025	5.44794	4	4	4	1	826	92.16	7.9		4		4
FALSE	High	Master Protein	Q96A65	Exocyst complex component 4 OS=Homo sapiens GN=EXOC4 PE=1 SV=1	0	7.7759	5.44148	4	4	4	1	974	110.429	6.49		4		4
FALSE	High	Master Protein	O43670	BUB3-interacting and GLEBS motif-containing protein ZNF207 OS=Homo sapiens GN=ZNF207 PE=1 SV=1	0.00158144	4.16063	5.43933	2	2	2	1	478	50.717	9.1		2		2
FALSE	Medium	Master Protein	Q9NQR4	Omega-amidase NIT2 OS=Homo sapiens GN=NIT2 PE=1 SV=1	0.0228063	1.66716	5.43478	1	1	1	1	276	30.589	7.21		1		1
FALSE	High	Master Protein	P35611	Alpha-adducin OS=Homo sapiens GN=ADD1 PE=1 SV=2	0	7.88109	5.42741	3	4	3	1	737	80.905	5.83		4		3
FALSE	Medium	Master Protein	Q969Q5	Ras-related protein Rab-24 OS=Homo sapiens GN=RAB24 PE=1 SV=1	0.0257099	1.60801	5.41872	1	1	1	1	203	23.109	6.23		1		1
FALSE	High	Master Protein	Q14807	Kinesin-like protein KIF22 OS=Homo sapiens GN=KIF22 PE=1 SV=5	0.000607903	4.51219	5.41353	2	2	2	1	665	73.217	9.45		2		2
FALSE	High	Master Protein	O43592	Exportin-T OS=Homo sapiens GN=XPOT PE=1 SV=2	0	12.1608	5.40541	4	4	4	1	962	109.893	5.39		4		4
FALSE	High	Master Protein	Q9H0W9	Ester hydrolase C11orf54 OS=Homo sapiens GN=C11orf54 PE=1 SV=1	0.00158144	3.694	5.39683	1	1	1	1	315	35.095	6.7		1		1
FALSE	High	Master Protein	Q7L7X3	Serine/threonine-protein kinase TAO1 OS=Homo sapiens GN=TAOK1 PE=1 SV=1	0	11.8333	5.39461	5	5	3	1	1001	115.997	7.65		5		5
FALSE	High	Master Protein	Q53EZ4	Centrosomal protein of 55 kDa OS=Homo sapiens GN=CEP55 PE=1 SV=3	0.000607903	4.7791	5.38793	2	2	2	1	464	54.145	7.01		2		2
FALSE	High	Master Protein	O00139	Kinesin-like protein KIF2A OS=Homo sapiens GN=KIF2A PE=1 SV=3	0	6.87503	5.38244	3	3	2	1	706	79.905	6.68		3		3
FALSE	High	Master Protein	Q14126	Desmoglein-2 OS=Homo sapiens GN=DSG2 PE=1 SV=2	0	10.6456	5.36673	4	6	4	1	1118	122.218	5.24		6		4
FALSE	High	Master Protein	Q9UHI6	Probable ATP-dependent RNA helicase DDX20 OS=Homo sapiens GN=DDX20 PE=1 SV=2	0	9.07185	5.33981	4	4	4	1	824	92.183	6.95		4		4
FALSE	Medium	Master Protein	Q9NVZ3	Adaptin ear-binding coat-associated protein 2 OS=Homo sapiens GN=NECAP2 PE=1 SV=1	0.0110294	1.92849	5.32319	1	1	1	1	263	28.321	8.38		1		1
FALSE	High	Master Protein	Q6P2E9	Enhancer of mRNA-decapping protein 4 OS=Homo sapiens GN=EDC4 PE=1 SV=1	0	15.3214	5.28194	5	5	5	1	1401	151.567	5.86		5		5
FALSE	High	Master Protein	Q9NQL2	Ras-related GTP-binding protein D OS=Homo sapiens GN=RRAGD PE=1 SV=1	0.000607903	5.80241	5.25	2	2	2	1	400	45.559	4.92		2		2
FALSE	High	Master Protein	Q147X3	N-alpha-acetyltransferase 30 OS=Homo sapiens GN=NAA30 PE=1 SV=1	0.00376294	2.82594	5.24862	1	1	1	1	362	39.295	5.52		1		1
FALSE	High	Master Protein	O15344	E3 ubiquitin-protein ligase Midline-1 OS=Homo sapiens GN=MID1 PE=1 SV=1	0.000607903	5.97156	5.24738	3	3	3	1	667	75.203	6.8		3		3
FALSE	High	Master Protein	Q9Y3Y2	Chromatin target of PRMT1 protein OS=Homo sapiens GN=CHTOP PE=1 SV=2	0.00342801	2.9393	5.24194	1	1	1	1	248	26.38	12.23		1		1
FALSE	High	Master Protein	P60953	Cell division control protein 42 homolog OS=Homo sapiens GN=CDC42 PE=1 SV=2	0.00158144	3.52057	5.2356	1	1	1	1	191	21.245	6.55		1		1
FALSE	High	Master Protein	P49589	Cysteine--tRNA ligase, cytoplasmic OS=Homo sapiens GN=CARS PE=1 SV=3	0.000607903	5.95456	5.2139	3	3	3	1	748	85.419	6.76		3		3
FALSE	High	Master Protein	Q9UNS2	COP9 signalosome complex subunit 3 OS=Homo sapiens GN=COPS3 PE=1 SV=3	0.00158144	3.93549	5.20095	2	2	2	1	423	47.842	6.65		2		2
FALSE	High	Master Protein	Q96M27	Protein PRRC1 OS=Homo sapiens GN=PRRC1 PE=1 SV=1	0	6.93771	5.16854	2	2	2	1	445	46.672	5.83		2		2
FALSE	High	Master Protein	Q9UI10	Translation initiation factor eIF-2B subunit delta OS=Homo sapiens GN=EIF2B4 PE=1 SV=2	0	6.88683	5.16252	2	2	2	1	523	57.521	9.38		2		2
FALSE	High	Master Protein	P51648	Fatty aldehyde dehydrogenase OS=Homo sapiens GN=ALDH3A2 PE=1 SV=1	0.00158144	3.72883	5.15464	2	2	2	1	485	54.813	7.88		2		2
FALSE	High	Master Protein	O60271	C-Jun-amino-terminal kinase-interacting protein 4 OS=Homo sapiens GN=SPAG9 PE=1 SV=4	0	16.6951	5.14762	6	6	6	1	1321	146.115	5.15		6		6
FALSE	High	Master Protein	O95573	Long-chain-fatty-acid--CoA ligase 3 OS=Homo sapiens GN=ACSL3 PE=1 SV=3	0.000607903	6.32768	5.13889	3	3	3	1	720	80.368	8.38		3		3
FALSE	High	Master Protein	P32121	Beta-arrestin-2 OS=Homo sapiens GN=ARRB2 PE=1 SV=2	0.00158144	3.82943	5.13447	2	2	2	1	409	46.077	7.69		2		2
FALSE	High	Master Protein	Q14145	Kelch-like ECH-associated protein 1 OS=Homo sapiens GN=KEAP1 PE=1 SV=2	0.000607903	6.12935	5.12821	3	3	3	1	624	69.621	6.44		3		3
FALSE	High	Master Protein	O60610	Protein diaphanous homolog 1 OS=Homo sapiens GN=DIAPH1 PE=1 SV=2	0	17.4666	5.11006	5	5	5	1	1272	141.258	5.41		5		5
FALSE	High	Master Protein	Q9H0E2	Toll-interacting protein OS=Homo sapiens GN=TOLLIP PE=1 SV=1	0.00158144	4.26011	5.10949	1	1	1	1	274	30.262	5.97		1		1
FALSE	High	Master Protein	P16989	Y-box-binding protein 3 OS=Homo sapiens GN=YBX3 PE=1 SV=4	0.000607903	4.67657	5.10753	2	2	2	1	372	40.066	9.77		2		2
FALSE	High	Master Protein	Q9Y2X3	Nucleolar protein 58 OS=Homo sapiens GN=NOP58 PE=1 SV=1	0.00120192	4.47154	5.10397	2	2	2	1	529	59.541	8.92		2		2
FALSE	High	Master Protein	P14735	Insulin-degrading enzyme OS=Homo sapiens GN=IDE PE=1 SV=4	0	11.6696	5.10304	5	5	5	1	1019	117.893	6.61		5		5
FALSE	High	Master Protein	Q9BVP2	Guanine nucleotide-binding protein-like 3 OS=Homo sapiens GN=GNL3 PE=1 SV=2	0	6.98113	5.10018	2	4	2	1	549	61.954	9.16		4		2
FALSE	High	Master Protein	P07954	Fumarate hydratase, mitochondrial OS=Homo sapiens GN=FH PE=1 SV=3	0.000607903	5.40352	5.09804	2	3	2	1	510	54.602	8.76		3		2
FALSE	High	Master Protein	P21281	V-type proton ATPase subunit B, brain isoform OS=Homo sapiens GN=ATP6V1B2 PE=1 SV=3	0.000607903	5.97626	5.08806	2	2	2	1	511	56.465	5.81		2		2
FALSE	High	Master Protein	P61758	Prefoldin subunit 3 OS=Homo sapiens GN=VBP1 PE=1 SV=3	0.00342801	2.84406	5.07614	1	1	1	1	197	22.643	7.11		1		1
FALSE	High	Master Protein	Q9Y4P8	WD repeat domain phosphoinositide-interacting protein 2 OS=Homo sapiens GN=WIPI2 PE=1 SV=1	0.00765632	2.26114	5.06608	1	1	1	1	454	49.377	6.46		1		1
FALSE	High	Master Protein	Q6P1N0	Coiled-coil and C2 domain-containing protein 1A OS=Homo sapiens GN=CC2D1A PE=1 SV=1	0	12.0783	5.04732	5	5	5	1	951	103.998	8.09		5		5
FALSE	High	Master Protein	P42166	Lamina-associated polypeptide 2, isoform alpha OS=Homo sapiens GN=TMPO PE=1 SV=2	0	8.04314	5.04323	3	3	3	1	694	75.446	7.66		3		3
FALSE	High	Master Protein	Q8TCT9	Minor histocompatibility antigen H13 OS=Homo sapiens GN=HM13 PE=1 SV=1	0.00120192	4.41009	5.03979	2	2	2	1	377	41.462	6.43		2		2
FALSE	High	Master Protein	Q14331	Protein FRG1 OS=Homo sapiens GN=FRG1 PE=1 SV=1	0.00158144	3.51414	5.03876	1	1	1	1	258	29.154	9.01		1		1
FALSE	High	Master Protein	Q9UBP0	Spastin OS=Homo sapiens GN=SPAST PE=1 SV=1	0.000607903	4.73216	5.03247	2	2	2	1	616	67.155	9.64		2		2
FALSE	High	Master Protein	Q9BRP1	Programmed cell death protein 2-like OS=Homo sapiens GN=PDCD2L PE=1 SV=1	0.000607903	4.48157	5.02793	2	3	2	1	358	39.391	4.86		3		2
FALSE	Medium	Master Protein	P09525	Annexin A4 OS=Homo sapiens GN=ANXA4 PE=1 SV=4	0.0412744	1.35754	5.01567	1	1	1	1	319	35.86	6.13		1		1
FALSE	High	Master Protein	P45974	Ubiquitin carboxyl-terminal hydrolase 5 OS=Homo sapiens GN=USP5 PE=1 SV=2	0	9.39909	5.01166	3	4	3	1	858	95.725	5.03		4		3
FALSE	High	Master Protein	Q13131	5'-AMP-activated protein kinase catalytic subunit alpha-1 OS=Homo sapiens GN=PRKAA1 PE=1 SV=4	0	7.02489	5.00894	2	2	1	1	559	63.969	8.12		2		2
FALSE	High	Master Protein	P28288	ATP-binding cassette sub-family D member 3 OS=Homo sapiens GN=ABCD3 PE=1 SV=1	0	10.0382	5.00759	3	3	3	1	659	75.428	9.36		3		3
FALSE	High	Master Protein	O95478	Ribosome biogenesis protein NSA2 homolog OS=Homo sapiens GN=NSA2 PE=1 SV=1	0.00795645	2.1098	5	1	1	1	1	260	30.047	10.27		1		1
FALSE	High	Master Protein	Q96C19	EF-hand domain-containing protein D2 OS=Homo sapiens GN=EFHD2 PE=1 SV=1	0.00456413	2.53091	5	1	1	1	1	240	26.68	5.2		1		1
FALSE	High	Master Protein	Q9NWV4	UPF0587 protein C1orf123 OS=Homo sapiens GN=C1orf123 PE=1 SV=1	0.00765632	2.16317	5	1	1	1	1	160	18.037	5.01		1		1
FALSE	High	Master Protein	Q86WB0	Nuclear-interacting partner of ALK OS=Homo sapiens GN=ZC3HC1 PE=1 SV=1	0.00158144	3.51737	4.98008	2	2	2	1	502	55.226	5.62		2		2
FALSE	Medium	Master Protein	O00299	Chloride intracellular channel protein 1 OS=Homo sapiens GN=CLIC1 PE=1 SV=4	0.0412744	1.35882	4.97925	1	1	1	1	241	26.906	5.17		1		1
FALSE	High	Master Protein	P13667	Protein disulfide-isomerase A4 OS=Homo sapiens GN=PDIA4 PE=1 SV=2	0.000607903	5.85107	4.96124	2	3	2	1	645	72.887	5.07		3		2
FALSE	High	Master Protein	Q3KNV8	Polycomb group RING finger protein 3 OS=Homo sapiens GN=PCGF3 PE=1 SV=1	0.00376294	2.74328	4.95868	1	1	1	1	242	28.097	8.22		1		1
FALSE	High	Master Protein	O75419	Cell division control protein 45 homolog OS=Homo sapiens GN=CDC45 PE=1 SV=1	0	8.55782	4.947	3	3	3	1	566	65.527	5.53		3		3
FALSE	High	Master Protein	P55039	Developmentally-regulated GTP-binding protein 2 OS=Homo sapiens GN=DRG2 PE=1 SV=1	0.00158144	4.15342	4.94505	2	2	1	1	364	40.72	8.88		2		2
FALSE	Medium	Master Protein	P28074	Proteasome subunit beta type-5 OS=Homo sapiens GN=PSMB5 PE=1 SV=3	0.0456817	1.30016	4.94297	1	1	1	1	263	28.462	6.92		1		1
FALSE	High	Master Protein	P40763	Signal transducer and activator of transcription 3 OS=Homo sapiens GN=STAT3 PE=1 SV=2	0	6.99669	4.93506	3	3	3	1	770	88.011	6.3		3		3
FALSE	High	Master Protein	Q9H8H3	Methyltransferase-like protein 7A OS=Homo sapiens GN=METTL7A PE=1 SV=1	0.00342801	2.84164	4.91803	1	1	1	1	244	28.301	8.38		1		1
FALSE	High	Master Protein	P54646	5'-AMP-activated protein kinase catalytic subunit alpha-2 OS=Homo sapiens GN=PRKAA2 PE=1 SV=2	0.000607903	6.11002	4.8913	2	2	1	1	552	62.28	7.75		2		2
FALSE	High	Master Protein	O75153	Clustered mitochondria protein homolog OS=Homo sapiens GN=CLUH PE=1 SV=2	0	13.7055	4.88923	6	6	6	1	1309	146.577	6.13		6		6
FALSE	High	Master Protein	O95163	Elongator complex protein 1 OS=Homo sapiens GN=IKBKAP PE=1 SV=3	0	12.059	4.87988	5	6	5	1	1332	150.159	5.94		6		5
FALSE	High	Master Protein	Q86UK7	Zinc finger protein 598 OS=Homo sapiens GN=ZNF598 PE=1 SV=1	0	7.21545	4.86726	3	3	3	1	904	98.575	8.4		3		3
FALSE	High	Master Protein	O95456	Proteasome assembly chaperone 1 OS=Homo sapiens GN=PSMG1 PE=1 SV=1	0.00158144	3.40099	4.86111	1	1	1	1	288	32.833	7.17		1		1
FALSE	High	Master Protein	Q92692	Nectin-2 OS=Homo sapiens GN=PVRL2 PE=1 SV=1	0.000607903	5.74038	4.83271	3	3	3	1	538	57.706	4.82		3		3
FALSE	High	Master Protein	O43148	mRNA cap guanine-N7 methyltransferase OS=Homo sapiens GN=RNMT PE=1 SV=1	0.00158144	3.84254	4.83193	2	2	2	1	476	54.809	6.61		2		2
FALSE	High	Master Protein	Q969X5	Endoplasmic reticulum-Golgi intermediate compartment protein 1 OS=Homo sapiens GN=ERGIC1 PE=1 SV=1	0.00422734	2.65014	4.82759	1	1	1	1	290	32.571	7.06		1		1
FALSE	High	Master Protein	Q9UBK7	Rab-like protein 2A OS=Homo sapiens GN=RABL2A PE=1 SV=1	0.00795645	2.12546	4.82456	1	1	1	1	228	26.099	4.89		1		1
FALSE	High	Master Protein	Q6P6C2	RNA demethylase ALKBH5 OS=Homo sapiens GN=ALKBH5 PE=1 SV=2	0	6.74482	4.82234	3	3	3	1	394	44.229	9.09		3		3
FALSE	High	Master Protein	Q9HAV4	Exportin-5 OS=Homo sapiens GN=XPO5 PE=1 SV=1	0	9.58527	4.81728	5	5	5	1	1204	136.222	5.8		5		5
FALSE	High	Master Protein	P48739	Phosphatidylinositol transfer protein beta isoform OS=Homo sapiens GN=PITPNB PE=1 SV=2	0.00765632	2.18782	4.79705	1	1	1	1	271	31.52	6.87		1		1
FALSE	High	Master Protein	Q9Y3Z3	Deoxynucleoside triphosphate triphosphohydrolase SAMHD1 OS=Homo sapiens GN=SAMHD1 PE=1 SV=2	0.00158144	3.91797	4.79233	3	3	3	1	626	72.155	7.14		3		3
FALSE	High	Master Protein	A5D8V6	Vacuolar protein sorting-associated protein 37C OS=Homo sapiens GN=VPS37C PE=1 SV=2	0.000607903	5.16507	4.78873	2	2	2	1	355	38.635	5.21		2		2
FALSE	High	Master Protein	Q6GMV2	SET and MYND domain-containing protein 5 OS=Homo sapiens GN=SMYD5 PE=1 SV=2	0.000607903	5.63138	4.78469	2	2	2	1	418	47.31	5.05		2		2
FALSE	High	Master Protein	Q9P287	BRCA2 and CDKN1A-interacting protein OS=Homo sapiens GN=BCCIP PE=1 SV=1	0.00158144	4.16967	4.77707	1	1	1	1	314	35.957	4.61		1		1
FALSE	High	Master Protein	Q9UJZ1	Stomatin-like protein 2, mitochondrial OS=Homo sapiens GN=STOML2 PE=1 SV=1	0.00202122	3.35369	4.77528	1	1	1	1	356	38.51	7.39		1		1
FALSE	High	Master Protein	Q9UI12	V-type proton ATPase subunit H OS=Homo sapiens GN=ATP6V1H PE=1 SV=1	0.000607903	4.49301	4.7619	2	2	2	1	483	55.847	6.48		2		2
FALSE	High	Master Protein	Q8TBC4	NEDD8-activating enzyme E1 catalytic subunit OS=Homo sapiens GN=UBA3 PE=1 SV=2	0.00158144	3.77814	4.75162	2	2	2	1	463	51.819	5.45		2		2
FALSE	High	Master Protein	Q13309	S-phase kinase-associated protein 2 OS=Homo sapiens GN=SKP2 PE=1 SV=2	0.000607903	4.97361	4.71698	2	2	2	1	424	47.731	7.11		2		2
FALSE	High	Master Protein	O60231	Putative pre-mRNA-splicing factor ATP-dependent RNA helicase DHX16 OS=Homo sapiens GN=DHX16 PE=1 SV=2	0	10.1932	4.70701	5	5	4	1	1041	119.189	6.8		5		5
FALSE	High	Master Protein	Q9BZE9	Tether containing UBX domain for GLUT4 OS=Homo sapiens GN=ASPSCR1 PE=1 SV=1	0.000607903	5.62081	4.70163	2	2	2	1	553	60.146	6.64		2		2
FALSE	Medium	Master Protein	Q9UQN3	Charged multivesicular body protein 2b OS=Homo sapiens GN=CHMP2B PE=1 SV=1	0.0310136	1.5376	4.69484	1	1	1	1	213	23.891	8.76		1		1
FALSE	Medium	Master Protein	Q969M3	Protein YIPF5 OS=Homo sapiens GN=YIPF5 PE=1 SV=1	0.0190779	1.75227	4.66926	1	1	1	1	257	27.971	4.36		1		1
FALSE	Medium	Master Protein	Q5HYI8	Rab-like protein 3 OS=Homo sapiens GN=RABL3 PE=1 SV=1	0.0273452	1.56928	4.66102	1	1	1	1	236	26.407	7.11		1		1
FALSE	High	Master Protein	Q9UKV8	Protein argonaute-2 OS=Homo sapiens GN=AGO2 PE=1 SV=3	0	7.66205	4.65658	3	3	3	1	859	97.146	9.19		3		3
FALSE	High	Master Protein	Q99829	Copine-1 OS=Homo sapiens GN=CPNE1 PE=1 SV=1	0.000607903	5.54717	4.65549	2	2	2	1	537	59.022	5.83		2		2
FALSE	High	Master Protein	Q9H269	Vacuolar protein sorting-associated protein 16 homolog OS=Homo sapiens GN=VPS16 PE=1 SV=2	0	9.7698	4.64839	3	3	3	1	839	94.634	6.77		3		3
FALSE	High	Master Protein	O75122	CLIP-associating protein 2 OS=Homo sapiens GN=CLASP2 PE=1 SV=2	0	10.8821	4.63679	5	6	3	1	1294	141.046	8.47		6		5
FALSE	High	Master Protein	P58107	Epiplakin OS=Homo sapiens GN=EPPK1 PE=1 SV=2	0	8.52188	4.63654	3	3	1	1	5090	555.279	5.6		3		3
FALSE	High	Master Protein	Q6P3W7	SCY1-like protein 2 OS=Homo sapiens GN=SCYL2 PE=1 SV=1	0	7.86892	4.62863	3	3	3	1	929	103.642	8.22		3		3
FALSE	Medium	Master Protein	Q712K3	Ubiquitin-conjugating enzyme E2 R2 OS=Homo sapiens GN=UBE2R2 PE=1 SV=1	0.0190779	1.74666	4.62185	1	1	1	1	238	27.149	4.42		1		1
FALSE	High	Master Protein	Q13557	Calcium/calmodulin-dependent protein kinase type II subunit delta OS=Homo sapiens GN=CAMK2D PE=1 SV=3	0.000607903	5.50123	4.60922	2	2	1	1	499	56.334	7.25		2		2
FALSE	Medium	Master Protein	P50749	Ras association domain-containing protein 2 OS=Homo sapiens GN=RASSF2 PE=1 SV=1	0.0394304	1.3808	4.60123	1	1	1	1	326	37.767	8.84		1		1
FALSE	High	Master Protein	Q13620	Cullin-4B OS=Homo sapiens GN=CUL4B PE=1 SV=4	0	9.15826	4.60022	4	5	4	1	913	103.916	7.37		5		4
FALSE	Medium	Master Protein	Q08752	Peptidyl-prolyl cis-trans isomerase D OS=Homo sapiens GN=PPID PE=1 SV=3	0.0476699	1.27108	4.59459	1	1	1	1	370	40.738	7.21		1		1
FALSE	High	Master Protein	Q8TAV0	Protein FAM76A OS=Homo sapiens GN=FAM76A PE=2 SV=1	0.00376294	2.66635	4.56026	1	1	1	1	307	35.027	9.19		1		1
FALSE	High	Master Protein	Q8WX93	Palladin OS=Homo sapiens GN=PALLD PE=1 SV=3	0	12.3993	4.55531	6	7	6	1	1383	150.47	7.09		7		6
FALSE	High	Master Protein	O00411	DNA-directed RNA polymerase, mitochondrial OS=Homo sapiens GN=POLRMT PE=1 SV=2	0	11.7571	4.55285	5	5	5	1	1230	138.532	8.98		5		5
FALSE	High	Master Protein	Q8N1G2	Cap-specific mRNA (nucleoside-2'-O-)-methyltransferase 1 OS=Homo sapiens GN=CMTR1 PE=1 SV=1	0	8.28071	4.5509	4	4	4	1	835	95.26	7.05		4		4
FALSE	High	Master Protein	Q6UN15	Pre-mRNA 3'-end-processing factor FIP1 OS=Homo sapiens GN=FIP1L1 PE=1 SV=1	0.000607903	6.01815	4.54545	2	2	2	1	594	66.487	5.59		2		2
FALSE	High	Master Protein	Q9Y5X1	Sorting nexin-9 OS=Homo sapiens GN=SNX9 PE=1 SV=1	0.000607903	4.58778	4.53782	2	2	2	1	595	66.55	5.58		2		2
FALSE	High	Master Protein	P05412	Transcription factor AP-1 OS=Homo sapiens GN=JUN PE=1 SV=2	0.00586643	2.41409	4.53172	1	1	1	1	331	35.653	8.76		1		1
FALSE	High	Master Protein	Q9NUQ8	ATP-binding cassette sub-family F member 3 OS=Homo sapiens GN=ABCF3 PE=1 SV=2	0.000607903	4.74177	4.5134	2	2	2	1	709	79.695	6.34		2		2
FALSE	High	Master Protein	Q12965	Unconventional myosin-Ie OS=Homo sapiens GN=MYO1E PE=1 SV=2	0	13.968	4.51264	5	5	5	1	1108	126.982	8.92		5		5
FALSE	High	Master Protein	Q14738	Serine/threonine-protein phosphatase 2A 56 kDa regulatory subunit delta isoform OS=Homo sapiens GN=PPP2R5D PE=1 SV=1	0.00158144	4.27433	4.48505	2	2	2	1	602	69.947	8.13		2		2
FALSE	High	Master Protein	Q96CT7	Coiled-coil domain-containing protein 124 OS=Homo sapiens GN=CCDC124 PE=1 SV=1	0.00456413	2.47821	4.4843	1	1	1	1	223	25.82	9.54		1		1
FALSE	High	Master Protein	Q9UKT4	F-box only protein 5 OS=Homo sapiens GN=FBXO5 PE=1 SV=1	0.00158144	3.84737	4.47427	2	2	2	1	447	50.114	8.92		2		2
FALSE	High	Master Protein	P04818	Thymidylate synthase OS=Homo sapiens GN=TYMS PE=1 SV=3	0.00342801	2.85699	4.47284	1	1	1	1	313	35.693	7.01		1		1
FALSE	High	Master Protein	O75794	Cell division cycle protein 123 homolog OS=Homo sapiens GN=CDC123 PE=1 SV=1	0.00765632	2.14491	4.46429	1	1	1	1	336	39.11	4.81		1		1
FALSE	High	Master Protein	Q5VT66	Mitochondrial amidoxime-reducing component 1 OS=Homo sapiens GN=MARC1 PE=1 SV=1	0.00158144	3.47508	4.45104	1	1	1	1	337	37.476	8.88		1		1
FALSE	High	Master Protein	P52594	Arf-GAP domain and FG repeat-containing protein 1 OS=Homo sapiens GN=AGFG1 PE=1 SV=2	0	9.8092	4.4484	2	3	2	1	562	58.224	8.63		3		2
FALSE	High	Master Protein	Q9UGM6	Tryptophan--tRNA ligase, mitochondrial OS=Homo sapiens GN=WARS2 PE=1 SV=1	0.00120192	4.42045	4.44444	1	1	1	1	360	40.121	9.28		1		1
FALSE	Medium	Master Protein	Q8NEJ9	Neuroguidin OS=Homo sapiens GN=NGDN PE=1 SV=1	0.027683	1.56384	4.44444	1	1	1	1	315	35.872	9.57		1		1
FALSE	High	Master Protein	Q8N6M0	OTU domain-containing protein 6B OS=Homo sapiens GN=OTUD6B PE=1 SV=1	0.000607903	5.27819	4.43686	1	1	1	1	293	33.791	6.05		1		1
FALSE	High	Master Protein	Q96P11	Probable 28S rRNA (cytosine-C(5))-methyltransferase OS=Homo sapiens GN=NSUN5 PE=1 SV=2	0.00376294	2.82045	4.4289	1	1	1	1	429	46.662	8.62		1		1
FALSE	High	Master Protein	P39687	Acidic leucine-rich nuclear phosphoprotein 32 family member A OS=Homo sapiens GN=ANP32A PE=1 SV=1	0.00456413	2.61654	4.41767	1	1	1	1	249	28.568	4.09		1		1
FALSE	High	Master Protein	Q8IXW5	Putative RNA polymerase II subunit B1 CTD phosphatase RPAP2 OS=Homo sapiens GN=RPAP2 PE=1 SV=1	0.00120192	4.45705	4.41176	2	2	2	1	612	69.466	7.78		2		2
FALSE	High	Master Protein	Q8WWK9	Cytoskeleton-associated protein 2 OS=Homo sapiens GN=CKAP2 PE=1 SV=1	0.000607903	6.66909	4.39239	2	2	2	1	683	76.939	9.41		2		2
FALSE	High	Master Protein	P41236	Protein phosphatase inhibitor 2 OS=Homo sapiens GN=PPP1R2 PE=1 SV=2	0.00740741	2.36593	4.39024	1	1	1	1	205	23.001	4.74		1		1
FALSE	High	Master Protein	Q6Y7W6	PERQ amino acid-rich with GYF domain-containing protein 2 OS=Homo sapiens GN=GIGYF2 PE=1 SV=1	0	15.202	4.38799	4	4	4	1	1299	149.978	5.54		4		4
FALSE	Medium	Master Protein	Q9NX20	39S ribosomal protein L16, mitochondrial OS=Homo sapiens GN=MRPL16 PE=1 SV=1	0.0190779	1.75746	4.38247	1	1	1	1	251	28.431	10.13		1		1
FALSE	High	Master Protein	Q8WVM8	Sec1 family domain-containing protein 1 OS=Homo sapiens GN=SCFD1 PE=1 SV=4	0.000607903	5.72873	4.36137	2	3	2	1	642	72.334	6.27		3		2
FALSE	High	Master Protein	Q00587	Cdc42 effector protein 1 OS=Homo sapiens GN=CDC42EP1 PE=1 SV=1	0.00158144	3.93802	4.34783	2	2	2	1	391	40.27	7.15		2		2
FALSE	High	Master Protein	B7ZAP0	Rab GTPase-activating protein 1-like, isoform 10 OS=Homo sapiens GN=RABGAP1L PE=1 SV=1	0.00910973	2.00546	4.34783	1	1	1	1	253	29.02	5.33		1		1
FALSE	High	Master Protein	Q6ZVM7	TOM1-like protein 2 OS=Homo sapiens GN=TOM1L2 PE=1 SV=1	0.00202122	3.34469	4.33925	2	2	2	1	507	55.522	4.79		2		2
FALSE	High	Master Protein	P04637	Cellular tumor antigen p53 OS=Homo sapiens GN=TP53 PE=1 SV=4	0.00456413	2.56146	4.3257	1	1	1	1	393	43.625	6.79		1		1
FALSE	Medium	Master Protein	Q7Z7A3	Cytoplasmic tRNA 2-thiolation protein 1 OS=Homo sapiens GN=CTU1 PE=1 SV=1	0.0197785	1.72377	4.31034	1	1	1	1	348	36.427	9.2		1		1
FALSE	High	Master Protein	Q9NVN8	Guanine nucleotide-binding protein-like 3-like protein OS=Homo sapiens GN=GNL3L PE=1 SV=1	0.00158144	3.42931	4.29553	2	2	2	1	582	65.532	8.44		2		2
FALSE	High	Master Protein	Q9BV68	E3 ubiquitin-protein ligase RNF126 OS=Homo sapiens GN=RNF126 PE=1 SV=1	0.00718133	2.40252	4.29448	1	1	1	1	326	35.562	5.72		1		1
FALSE	High	Master Protein	O14910	Protein lin-7 homolog A OS=Homo sapiens GN=LIN7A PE=1 SV=2	0.00342801	2.92154	4.29185	1	1	1	1	233	25.981	8.72		1		1
FALSE	High	Master Protein	Q9Y6C9	Mitochondrial carrier homolog 2 OS=Homo sapiens GN=MTCH2 PE=1 SV=1	0.00456413	2.57938	4.29043	1	1	1	1	303	33.309	7.97		1		1
FALSE	High	Master Protein	O43402	ER membrane protein complex subunit 8 OS=Homo sapiens GN=EMC8 PE=1 SV=1	0.00202122	3.28325	4.28571	1	1	1	1	210	23.758	6.4		1		1
FALSE	High	Master Protein	P49591	Serine--tRNA ligase, cytoplasmic OS=Homo sapiens GN=SARS PE=1 SV=3	0.000607903	5.48965	4.28016	2	2	2	1	514	58.74	6.43		2		2
FALSE	High	Master Protein	P36776	Lon protease homolog, mitochondrial OS=Homo sapiens GN=LONP1 PE=1 SV=2	0	12.083	4.27529	4	4	4	1	959	106.422	6.39		4		4
FALSE	High	Master Protein	O95772	MLN64 N-terminal domain homolog OS=Homo sapiens GN=STARD3NL PE=1 SV=1	0.00499093	2.45593	4.2735	1	1	1	1	234	26.638	4.81		1		1
FALSE	High	Master Protein	P36871	Phosphoglucomutase-1 OS=Homo sapiens GN=PGM1 PE=1 SV=3	0.000607903	5.37875	4.27046	2	2	2	1	562	61.411	6.76		2		2
FALSE	High	Master Protein	Q6P3X3	Tetratricopeptide repeat protein 27 OS=Homo sapiens GN=TTC27 PE=1 SV=1	0.00202122	3.09315	4.27046	2	2	2	1	843	96.571	5.59		2		2
FALSE	High	Master Protein	Q8ND24	RING finger protein 214 OS=Homo sapiens GN=RNF214 PE=1 SV=2	0	8.22013	4.26743	3	3	3	1	703	77.619	6.95		3		3
FALSE	High	Master Protein	P45985	Dual specificity mitogen-activated protein kinase kinase 4 OS=Homo sapiens GN=MAP2K4 PE=1 SV=1	0.00740741	2.30662	4.26065	1	1	1	1	399	44.259	8.07		1		1
FALSE	High	Master Protein	Q9NTX5	Ethylmalonyl-CoA decarboxylase OS=Homo sapiens GN=ECHDC1 PE=1 SV=2	0.00718133	2.39599	4.23453	1	1	1	1	307	33.677	8.21		1		1
FALSE	High	Master Protein	Q8WXX5	DnaJ homolog subfamily C member 9 OS=Homo sapiens GN=DNAJC9 PE=1 SV=1	0.00342801	2.84832	4.23077	1	1	1	1	260	29.891	5.73		1		1
FALSE	High	Master Protein	Q9ULV4	Coronin-1C OS=Homo sapiens GN=CORO1C PE=1 SV=1	0.00202122	3.29335	4.21941	2	2	2	1	474	53.215	7.08		2		2
FALSE	High	Master Protein	Q9UBS8	E3 ubiquitin-protein ligase RNF14 OS=Homo sapiens GN=RNF14 PE=1 SV=1	0.00158144	4.34576	4.21941	2	2	2	1	474	53.802	4.75		2		2
FALSE	High	Master Protein	Q6NXE6	Armadillo repeat-containing protein 6 OS=Homo sapiens GN=ARMC6 PE=1 SV=2	0.000607903	5.51463	4.19162	2	2	2	1	501	54.107	6.24		2		2
FALSE	High	Master Protein	Q15003	Condensin complex subunit 2 OS=Homo sapiens GN=NCAPH PE=1 SV=3	0	8.16084	4.18354	3	3	3	1	741	82.511	5.06		3		3
FALSE	High	Master Protein	O43491	Band 4.1-like protein 2 OS=Homo sapiens GN=EPB41L2 PE=1 SV=1	0.000607903	6.67953	4.1791	3	4	3	1	1005	112.519	5.44		4		3
FALSE	High	Master Protein	Q9H2P0	Activity-dependent neuroprotector homeobox protein OS=Homo sapiens GN=ADNP PE=1 SV=1	0	9.68732	4.17423	4	4	4	1	1102	123.485	7.34		4		4
FALSE	Medium	Master Protein	Q15126	Phosphomevalonate kinase OS=Homo sapiens GN=PMVK PE=1 SV=3	0.027683	1.56735	4.16667	1	1	1	1	192	21.981	5.73		1		1
FALSE	Medium	Master Protein	P51858	Hepatoma-derived growth factor OS=Homo sapiens GN=HDGF PE=1 SV=1	0.0110294	1.90868	4.16667	1	1	1	1	240	26.772	4.73		1		1
FALSE	High	Master Protein	Q9NVH2	Integrator complex subunit 7 OS=Homo sapiens GN=INTS7 PE=1 SV=1	0	8.17644	4.158	4	4	4	1	962	106.766	8.02		4		4
FALSE	High	Master Protein	Q8N8R5	UPF0565 protein C2orf69 OS=Homo sapiens GN=C2orf69 PE=1 SV=1	0.00158144	4.31867	4.15584	1	1	1	1	385	43.421	8.09		1		1
FALSE	High	Master Protein	Q9NPQ8	Synembryn-A OS=Homo sapiens GN=RIC8A PE=1 SV=3	0.000607903	6.12512	4.14313	2	2	2	1	531	59.671	5.33		2		2
FALSE	High	Master Protein	Q9Y285	Phenylalanine--tRNA ligase alpha subunit OS=Homo sapiens GN=FARSA PE=1 SV=3	0.00158144	3.52349	4.13386	2	2	2	1	508	57.528	7.8		2		2
FALSE	High	Master Protein	Q9NVV0	Trimeric intracellular cation channel type B OS=Homo sapiens GN=TMEM38B PE=1 SV=1	0.00342801	2.9024	4.12371	1	1	1	1	291	32.489	9.06		1		1
FALSE	High	Master Protein	O75027	ATP-binding cassette sub-family B member 7, mitochondrial OS=Homo sapiens GN=ABCB7 PE=1 SV=2	0	8.73526	4.12234	3	3	3	1	752	82.589	9.33		3		3
FALSE	High	Master Protein	Q92879	CUGBP Elav-like family member 1 OS=Homo sapiens GN=CELF1 PE=1 SV=2	0.000607903	5.94006	4.11523	2	2	2	1	486	52.03	8.46		2		2
FALSE	High	Master Protein	Q6L8Q7	2',5'-phosphodiesterase 12 OS=Homo sapiens GN=PDE12 PE=1 SV=2	0.000607903	5.5571	4.10509	2	5	2	1	609	67.309	6.57		5		2
FALSE	Medium	Master Protein	Q7Z4W1	L-xylulose reductase OS=Homo sapiens GN=DCXR PE=1 SV=2	0.0200708	1.71197	4.09836	1	1	1	1	244	25.897	8.1		1		1
FALSE	High	Master Protein	Q13868	Exosome complex component RRP4 OS=Homo sapiens GN=EXOSC2 PE=1 SV=2	0.00158144	3.4988	4.09556	1	1	1	1	293	32.768	7.5		1		1
FALSE	High	Master Protein	O15162	Phospholipid scramblase 1 OS=Homo sapiens GN=PLSCR1 PE=1 SV=1	0.00910973	2.03758	4.08805	1	1	1	1	318	35.026	4.94		1		1
FALSE	Medium	Master Protein	Q9HD42	Charged multivesicular body protein 1a OS=Homo sapiens GN=CHMP1A PE=1 SV=1	0.0431655	1.32883	4.08163	1	1	1	1	196	21.689	8.06		1		1
FALSE	High	Master Protein	Q9UJY4	ADP-ribosylation factor-binding protein GGA2 OS=Homo sapiens GN=GGA2 PE=1 SV=3	0	7.12759	4.0783	2	2	2	1	613	67.108	6.55		2		2
FALSE	High	Master Protein	Q5T8P6	RNA-binding protein 26 OS=Homo sapiens GN=RBM26 PE=1 SV=3	0	7.8557	4.0715	3	3	2	1	1007	113.527	9.16		3		3
FALSE	High	Master Protein	Q5JTZ9	Alanine--tRNA ligase, mitochondrial OS=Homo sapiens GN=AARS2 PE=1 SV=1	0.000607903	5.37488	4.06091	3	3	3	1	985	107.273	6.27		3		3
FALSE	High	Master Protein	O96013	Serine/threonine-protein kinase PAK 4 OS=Homo sapiens GN=PAK4 PE=1 SV=1	0.000607903	6.05302	4.06091	2	2	2	1	591	64.032	9.73		2		2
FALSE	High	Master Protein	Q9H0L4	Cleavage stimulation factor subunit 2 tau variant OS=Homo sapiens GN=CSTF2T PE=1 SV=1	0.000607903	5.52859	4.05844	2	3	2	1	616	64.396	7.25		3		2
FALSE	High	Master Protein	Q7L1Q6	Basic leucine zipper and W2 domain-containing protein 1 OS=Homo sapiens GN=BZW1 PE=1 SV=1	0.00158144	4.23328	4.05728	2	3	2	1	419	48.013	5.92		3		2
FALSE	High	Master Protein	Q9BSK2	Solute carrier family 25 member 33 OS=Homo sapiens GN=SLC25A33 PE=1 SV=1	0.00202122	3.37603	4.04984	1	1	1	1	321	35.352	9.6		1		1
FALSE	High	Master Protein	Q04323	UBX domain-containing protein 1 OS=Homo sapiens GN=UBXN1 PE=1 SV=2	0.00158144	4.36552	4.0404	1	1	1	1	297	33.305	5.25		1		1
FALSE	Medium	Master Protein	Q15006	ER membrane protein complex subunit 2 OS=Homo sapiens GN=EMC2 PE=1 SV=1	0.0451613	1.30803	4.0404	1	1	1	1	297	34.811	6.57		1		1
FALSE	High	Master Protein	Q96NB2	Sideroflexin-2 OS=Homo sapiens GN=SFXN2 PE=1 SV=2	0.00158144	3.71422	4.03727	1	1	1	1	322	36.208	9.41		1		1
FALSE	High	Master Protein	O00233	26S proteasome non-ATPase regulatory subunit 9 OS=Homo sapiens GN=PSMD9 PE=1 SV=3	0.00740741	2.27124	4.03587	1	1	1	1	223	24.667	6.95		1		1
FALSE	High	Master Protein	Q8N6H7	ADP-ribosylation factor GTPase-activating protein 2 OS=Homo sapiens GN=ARFGAP2 PE=1 SV=1	0	7.78417	4.03071	2	2	2	1	521	56.685	7.99		2		2
FALSE	Medium	Master Protein	Q96N66	Lysophospholipid acyltransferase 7 OS=Homo sapiens GN=MBOAT7 PE=1 SV=2	0.0437747	1.31605	4.02542	1	2	1	1	472	52.73	8.97		2		1
FALSE	High	Master Protein	Q8NEW0	Zinc transporter 7 OS=Homo sapiens GN=SLC30A7 PE=2 SV=1	0.00158144	4.2561	3.98936	1	1	1	1	376	41.599	6.95		1		1
FALSE	High	Master Protein	Q8TAF3	WD repeat-containing protein 48 OS=Homo sapiens GN=WDR48 PE=1 SV=1	0.000607903	5.83647	3.98818	2	2	2	1	677	76.162	7.03		2		2
FALSE	High	Master Protein	Q9H334	Forkhead box protein P1 OS=Homo sapiens GN=FOXP1 PE=1 SV=1	0.00120192	4.45397	3.98818	2	2	2	1	677	75.27	6.67		2		2
FALSE	High	Master Protein	Q13371	Phosducin-like protein OS=Homo sapiens GN=PDCL PE=1 SV=3	0.00740741	2.26777	3.98671	1	1	1	1	301	34.26	4.73		1		1
FALSE	High	Master Protein	Q7Z6K5	Arpin OS=Homo sapiens GN=ARPIN PE=1 SV=1	0.00456413	2.54272	3.9823	1	1	1	1	226	24.927	5.83		1		1
FALSE	High	Master Protein	Q9BU89	Deoxyhypusine hydroxylase OS=Homo sapiens GN=DOHH PE=1 SV=1	0.00376294	2.81673	3.97351	1	1	1	1	302	32.883	4.83		1		1
FALSE	High	Master Protein	P33316	Deoxyuridine 5'-triphosphate nucleotidohydrolase, mitochondrial OS=Homo sapiens GN=DUT PE=1 SV=4	0.00499093	2.45992	3.96825	1	1	1	1	252	26.547	9.36		1		1
FALSE	High	Master Protein	Q8N5S9	Calcium/calmodulin-dependent protein kinase kinase 1 OS=Homo sapiens GN=CAMKK1 PE=1 SV=2	0.00376294	2.81051	3.9604	1	1	1	1	505	55.701	5.78		1		1
FALSE	High	Master Protein	Q9Y4W2	Ribosomal biogenesis protein LAS1L OS=Homo sapiens GN=LAS1L PE=1 SV=2	0.000607903	6.10155	3.95095	2	2	2	1	734	83.013	4.73		2		2
FALSE	High	Master Protein	Q92542	Nicastrin OS=Homo sapiens GN=NCSTN PE=1 SV=2	0	7.26553	3.94922	3	3	3	1	709	78.362	5.99		3		3
FALSE	Medium	Master Protein	O43639	Cytoplasmic protein NCK2 OS=Homo sapiens GN=NCK2 PE=1 SV=2	0.0295455	1.55222	3.94737	1	1	1	1	380	42.889	6.95		1		1
FALSE	High	Master Protein	Q8IZP0	Abl interactor 1 OS=Homo sapiens GN=ABI1 PE=1 SV=4	0.000607903	4.59705	3.93701	2	2	1	1	508	55.047	7.06		2		2
FALSE	High	Master Protein	Q9H3Q1	Cdc42 effector protein 4 OS=Homo sapiens GN=CDC42EP4 PE=1 SV=1	0.00158144	3.47651	3.93258	1	1	1	1	356	37.957	5.19		1		1
FALSE	High	Master Protein	Q16644	MAP kinase-activated protein kinase 3 OS=Homo sapiens GN=MAPKAPK3 PE=1 SV=1	0.00250878	3.04046	3.9267	2	2	2	1	382	42.96	7.28		2		2
FALSE	High	Master Protein	Q96AG4	Leucine-rich repeat-containing protein 59 OS=Homo sapiens GN=LRRC59 PE=1 SV=1	0.00202122	3.28266	3.90879	1	1	1	1	307	34.909	9.57		1		1
FALSE	High	Master Protein	Q9Y484	WD repeat domain phosphoinositide-interacting protein 4 OS=Homo sapiens GN=WDR45 PE=2 SV=1	0.00765632	2.19613	3.88889	1	1	1	1	360	39.842	7.14		1		1
FALSE	High	Master Protein	Q8ND56	Protein LSM14 homolog A OS=Homo sapiens GN=LSM14A PE=1 SV=3	0.00158144	3.91905	3.88769	2	2	2	1	463	50.499	9.52		2		2
FALSE	High	Master Protein	Q92878	DNA repair protein RAD50 OS=Homo sapiens GN=RAD50 PE=1 SV=1	0	12.211	3.8872	5	5	5	1	1312	153.797	6.89		5		5
FALSE	High	Master Protein	O14562	Ubiquitin domain-containing protein UBFD1 OS=Homo sapiens GN=UBFD1 PE=1 SV=2	0.00158144	3.42597	3.8835	1	1	1	1	309	33.361	5.77		1		1
FALSE	High	Master Protein	Q9NVE7	Pantothenate kinase 4 OS=Homo sapiens GN=PANK4 PE=1 SV=1	0	7.90116	3.88098	2	2	2	1	773	85.937	6.28		2		2
FALSE	High	Master Protein	P61764	Syntaxin-binding protein 1 OS=Homo sapiens GN=STXBP1 PE=1 SV=1	0	6.94221	3.87205	2	2	2	1	594	67.526	6.96		2		2
FALSE	High	Master Protein	P23634	Plasma membrane calcium-transporting ATPase 4 OS=Homo sapiens GN=ATP2B4 PE=1 SV=2	0	9.67451	3.86785	4	4	1	1	1241	137.833	6.6		4		4
FALSE	High	Master Protein	Q9H993	Protein-glutamate O-methyltransferase OS=Homo sapiens GN=ARMT1 PE=1 SV=1	0.00158144	4.25111	3.85488	1	1	1	1	441	51.14	5.76		1		1
FALSE	High	Master Protein	Q15418	Ribosomal protein S6 kinase alpha-1 OS=Homo sapiens GN=RPS6KA1 PE=1 SV=2	0.000607903	5.30701	3.80952	2	2	1	1	735	82.671	7.83		2		2
FALSE	High	Master Protein	O00469	Procollagen-lysine,2-oxoglutarate 5-dioxygenase 2 OS=Homo sapiens GN=PLOD2 PE=1 SV=2	0.000607903	4.78264	3.79919	2	2	2	1	737	84.632	6.71		2		2
FALSE	Medium	Master Protein	A1L0T0	Acetolactate synthase-like protein OS=Homo sapiens GN=ILVBL PE=1 SV=2	0.0114099	1.89722	3.79747	1	1	1	1	632	67.825	8.15		1		1
FALSE	High	Master Protein	P28070	Proteasome subunit beta type-4 OS=Homo sapiens GN=PSMB4 PE=1 SV=4	0.00376294	2.76346	3.78788	1	1	1	1	264	29.185	5.97		1		1
FALSE	High	Master Protein	Q8N2G8	GH3 domain-containing protein OS=Homo sapiens GN=GHDC PE=1 SV=2	0.000607903	5.07956	3.77358	2	2	2	1	530	57.487	7.88		2		2
FALSE	High	Master Protein	Q9NXF1	Testis-expressed sequence 10 protein OS=Homo sapiens GN=TEX10 PE=1 SV=2	0.00158144	3.64159	3.76749	2	2	2	1	929	105.608	9.36		2		2
FALSE	High	Master Protein	Q8TB03	Uncharacterized protein CXorf38 OS=Homo sapiens GN=CXorf38 PE=1 SV=1	0.00718133	2.38679	3.76176	1	1	1	1	319	36.646	6.3		1		1
FALSE	High	Master Protein	Q9Y580	RNA-binding protein 7 OS=Homo sapiens GN=RBM7 PE=1 SV=1	0.00765632	2.20252	3.7594	1	1	1	1	266	30.485	9.57		1		1
FALSE	High	Master Protein	Q86W50	Methyltransferase-like protein 16 OS=Homo sapiens GN=METTL16 PE=1 SV=2	0.000607903	5.27836	3.73665	2	2	2	1	562	63.581	7.85		2		2
FALSE	High	Master Protein	P20020	Plasma membrane calcium-transporting ATPase 1 OS=Homo sapiens GN=ATP2B1 PE=1 SV=3	0	11.0795	3.73609	4	4	1	1	1258	138.668	6.04		4		4
FALSE	High	Master Protein	Q9NXW2	DnaJ homolog subfamily B member 12 OS=Homo sapiens GN=DNAJB12 PE=1 SV=4	0.00158144	4.22257	3.73333	1	1	1	1	375	41.793	8.53		1		1
FALSE	High	Master Protein	Q9Y5B8	Nucleoside diphosphate kinase 7 OS=Homo sapiens GN=NME7 PE=1 SV=1	0.00158144	3.44201	3.7234	1	1	1	1	376	42.464	6.47		1		1
FALSE	High	Master Protein	O95429	BAG family molecular chaperone regulator 4 OS=Homo sapiens GN=BAG4 PE=1 SV=1	0.000607903	5.67142	3.71991	1	1	1	1	457	49.563	5.12		1		1
FALSE	High	Master Protein	O14772	Fucose-1-phosphate guanylyltransferase OS=Homo sapiens GN=FPGT PE=1 SV=2	0.00120192	4.46269	3.7037	2	2	2	1	594	66.556	6.48		2		2
FALSE	High	Master Protein	Q9H5H4	Zinc finger protein 768 OS=Homo sapiens GN=ZNF768 PE=1 SV=2	0.00158144	4.35976	3.7037	2	2	2	1	540	60.191	7.97		2		2
FALSE	High	Master Protein	P41743	Protein kinase C iota type OS=Homo sapiens GN=PRKCI PE=1 SV=2	0	6.92648	3.69128	2	2	2	1	596	68.218	5.85		2		2
FALSE	High	Master Protein	Q8WVV9	Heterogeneous nuclear ribonucleoprotein L-like OS=Homo sapiens GN=HNRNPLL PE=1 SV=1	0.000607903	5.91887	3.69004	2	3	1	1	542	60.045	7.72		3		2
FALSE	Medium	Master Protein	Q15907	Ras-related protein Rab-11B OS=Homo sapiens GN=RAB11B PE=1 SV=4	0.0200708	1.70312	3.66972	1	1	1	1	218	24.473	5.94		1		1
FALSE	High	Master Protein	Q9H6U6	Breast carcinoma-amplified sequence 3 OS=Homo sapiens GN=BCAS3 PE=1 SV=3	0.000607903	5.29873	3.66379	3	3	3	1	928	101.172	6.7		3		3
FALSE	Medium	Master Protein	Q9UN37	Vacuolar protein sorting-associated protein 4A OS=Homo sapiens GN=VPS4A PE=1 SV=1	0.0246249	1.63227	3.66133	1	1	1	1	437	48.867	7.8		1		1
FALSE	High	Master Protein	Q7Z2Z2	Elongation factor Tu GTP-binding domain-containing protein 1 OS=Homo sapiens GN=EFTUD1 PE=1 SV=2	0	8.2702	3.66071	4	4	4	1	1120	125.35	5.91		4		4
FALSE	High	Master Protein	Q15653	NF-kappa-B inhibitor beta OS=Homo sapiens GN=NFKBIB PE=1 SV=2	0.00202122	3.38018	3.65169	1	1	1	1	356	37.748	4.84		1		1
FALSE	High	Master Protein	P09496	Clathrin light chain A OS=Homo sapiens GN=CLTA PE=1 SV=1	0.00376294	2.68698	3.62903	1	1	1	1	248	27.06	4.51		1		1
FALSE	High	Master Protein	P36915	Guanine nucleotide-binding protein-like 1 OS=Homo sapiens GN=GNL1 PE=1 SV=2	0.000607903	6.08873	3.62438	2	2	2	1	607	68.619	5.8		2		2
FALSE	Medium	Master Protein	P22059	Oxysterol-binding protein 1 OS=Homo sapiens GN=OSBP PE=1 SV=1	0.0187251	1.76904	3.59356	1	1	1	1	807	89.365	7.3		1		1
FALSE	High	Master Protein	P20700	Lamin-B1 OS=Homo sapiens GN=LMNB1 PE=1 SV=2	0.00158144	3.90518	3.58362	2	2	2	1	586	66.368	5.16		2		2
FALSE	High	Master Protein	Q6P1J9	Parafibromin OS=Homo sapiens GN=CDC73 PE=1 SV=1	0.000607903	4.57214	3.57815	2	2	2	1	531	60.539	9.61		2		2
FALSE	High	Master Protein	P08047	Transcription factor Sp1 OS=Homo sapiens GN=SP1 PE=1 SV=3	0.00795645	2.11999	3.56688	1	1	1	1	785	80.644	7.34		1		1
FALSE	High	Master Protein	P09543	2',3'-cyclic-nucleotide 3'-phosphodiesterase OS=Homo sapiens GN=CNP PE=1 SV=2	0.00765632	2.22738	3.56295	1	1	1	1	421	47.549	9.07		1		1
FALSE	High	Master Protein	Q9NZT2	Opioid growth factor receptor OS=Homo sapiens GN=OGFR PE=1 SV=3	0.000607903	4.68365	3.54505	2	2	2	1	677	73.28	4.84		2		2
FALSE	High	Master Protein	Q99986	Serine/threonine-protein kinase VRK1 OS=Homo sapiens GN=VRK1 PE=1 SV=1	0.00158144	3.79102	3.53535	1	1	1	1	396	45.447	8.91		1		1
FALSE	High	Master Protein	O00429	Dynamin-1-like protein OS=Homo sapiens GN=DNM1L PE=1 SV=2	0.00158144	3.84214	3.53261	2	3	2	1	736	81.826	6.81		3		2
FALSE	High	Master Protein	Q9Y6I9	Testis-expressed sequence 264 protein OS=Homo sapiens GN=TEX264 PE=1 SV=1	0.00586643	2.41556	3.51438	1	1	1	1	313	34.167	4.86		1		1
FALSE	Medium	Master Protein	Q9H3F6	BTB/POZ domain-containing adapter for CUL3-mediated RhoA degradation protein 3 OS=Homo sapiens GN=KCTD10 PE=1 SV=1	0.0228063	1.67695	3.51438	1	1	1	1	313	35.41	6.34		1		1
FALSE	High	Master Protein	Q5JSH3	WD repeat-containing protein 44 OS=Homo sapiens GN=WDR44 PE=1 SV=1	0	7.34526	3.50493	3	3	3	1	913	101.304	5.45		3		3
FALSE	High	Master Protein	Q969K3	E3 ubiquitin-protein ligase RNF34 OS=Homo sapiens GN=RNF34 PE=1 SV=1	0.00158144	3.7716	3.49462	1	1	1	1	372	41.614	4.96		1		1
FALSE	High	Master Protein	Q7L5N7	Lysophosphatidylcholine acyltransferase 2 OS=Homo sapiens GN=LPCAT2 PE=1 SV=1	0.00158144	3.95033	3.49265	2	2	2	1	544	60.169	6.55		2		2
FALSE	High	Master Protein	O94832	Unconventional myosin-Id OS=Homo sapiens GN=MYO1D PE=1 SV=2	0	7.2603	3.47913	4	4	4	1	1006	116.129	9.39		4		4
FALSE	High	Master Protein	O14965	Aurora kinase A OS=Homo sapiens GN=AURKA PE=1 SV=2	0.00158144	4.13876	3.47395	1	1	1	1	403	45.781	9.39		1		1
FALSE	High	Master Protein	Q9HC84	Mucin-5B OS=Homo sapiens GN=MUC5B PE=1 SV=3	0	32.4939	3.47102	12	12	12	1	5762	595.96	6.64		12		12
FALSE	High	Master Protein	Q9BQG0	Myb-binding protein 1A OS=Homo sapiens GN=MYBBP1A PE=1 SV=2	0	11.7204	3.46386	4	5	4	1	1328	148.762	9.28		5		4
FALSE	High	Master Protein	Q13554	Calcium/calmodulin-dependent protein kinase type II subunit beta OS=Homo sapiens GN=CAMK2B PE=1 SV=3	0.000607903	4.82309	3.45345	2	2	1	1	666	72.632	7.27		2		2
FALSE	High	Master Protein	Q96I51	Williams-Beuren syndrome chromosomal region 16 protein OS=Homo sapiens GN=WBSCR16 PE=1 SV=2	0.00456413	2.60924	3.44828	1	1	1	1	464	49.965	8.4		1		1
FALSE	High	Master Protein	O00625	Pirin OS=Homo sapiens GN=PIR PE=1 SV=1	0.00376294	2.83416	3.44828	1	1	1	1	290	32.093	6.92		1		1
FALSE	High	Master Protein	Q15545	Transcription initiation factor TFIID subunit 7 OS=Homo sapiens GN=TAF7 PE=1 SV=1	0.00158144	3.80024	3.4384	1	1	1	1	349	40.234	5.2		1		1
FALSE	High	Master Protein	Q9UQ13	Leucine-rich repeat protein SHOC-2 OS=Homo sapiens GN=SHOC2 PE=1 SV=2	0.000607903	6.28904	3.43643	2	2	2	1	582	64.847	8.46		2		2
FALSE	Medium	Master Protein	Q9NVV4	Poly(A) RNA polymerase, mitochondrial OS=Homo sapiens GN=MTPAP PE=1 SV=1	0.0187251	1.76624	3.43643	1	1	1	1	582	66.13	9.04		1		1
FALSE	High	Master Protein	P49354	Protein farnesyltransferase/geranylgeranyltransferase type-1 subunit alpha OS=Homo sapiens GN=FNTA PE=1 SV=1	0.00158144	3.60748	3.43008	1	2	1	1	379	44.381	5.08		2		1
FALSE	High	Master Protein	Q9UGP8	Translocation protein SEC63 homolog OS=Homo sapiens GN=SEC63 PE=1 SV=2	0.000607903	5.92842	3.42105	2	2	2	1	760	87.942	5.31		2		2
FALSE	High	Master Protein	P46977	Dolichyl-diphosphooligosaccharide--protein glycosyltransferase subunit STT3A OS=Homo sapiens GN=STT3A PE=1 SV=2	0.000607903	6.2053	3.40426	2	3	2	1	705	80.477	8.07		3		2
FALSE	High	Master Protein	P01833	Polymeric immunoglobulin receptor OS=Homo sapiens GN=PIGR PE=1 SV=4	0	7.03705	3.40314	2	2	2	1	764	83.232	5.74		2		2
FALSE	High	Master Protein	Q7Z460	CLIP-associating protein 1 OS=Homo sapiens GN=CLASP1 PE=1 SV=1	0	13.2751	3.38101	5	5	3	1	1538	169.346	9.03		5		5
FALSE	High	Master Protein	O00186	Syntaxin-binding protein 3 OS=Homo sapiens GN=STXBP3 PE=1 SV=2	0.000607903	6.07388	3.37838	2	2	2	1	592	67.721	7.8		2		2
FALSE	Medium	Master Protein	Q9Y3B8	Oligoribonuclease, mitochondrial OS=Homo sapiens GN=REXO2 PE=1 SV=3	0.0373245	1.43628	3.37553	1	1	1	1	237	26.816	6.87		1		1
FALSE	High	Master Protein	Q13573	SNW domain-containing protein 1 OS=Homo sapiens GN=SNW1 PE=1 SV=1	0.000607903	5.32711	3.35821	2	2	2	1	536	61.456	9.52		2		2
FALSE	High	Master Protein	Q8ND83	SLAIN motif-containing protein 1 OS=Homo sapiens GN=SLAIN1 PE=1 SV=3	0.00376294	2.74449	3.34507	1	1	1	1	568	60.557	7.64		1		1
FALSE	High	Master Protein	P35626	Beta-adrenergic receptor kinase 2 OS=Homo sapiens GN=ADRBK2 PE=1 SV=2	0.000607903	5.12289	3.34302	2	2	1	1	688	79.658	7.62		2		2
FALSE	Medium	Master Protein	O00767	Acyl-CoA desaturase OS=Homo sapiens GN=SCD PE=1 SV=2	0.039752	1.37696	3.34262	1	1	1	1	359	41.496	9		1		1
FALSE	High	Master Protein	O95149	Snurportin-1 OS=Homo sapiens GN=SNUPN PE=1 SV=1	0.00910973	2.04316	3.33333	1	1	1	1	360	41.116	6.64		1		1
FALSE	High	Master Protein	Q969Z0	Protein TBRG4 OS=Homo sapiens GN=TBRG4 PE=1 SV=1	0.000607903	4.47699	3.32805	2	2	2	1	631	70.693	7.42		2		2
FALSE	Medium	Master Protein	P38159	RNA-binding motif protein, X chromosome OS=Homo sapiens GN=RBMX PE=1 SV=3	0.0431655	1.33658	3.32481	1	1	1	1	391	42.306	10.05		1		1
FALSE	High	Master Protein	P53611	Geranylgeranyl transferase type-2 subunit beta OS=Homo sapiens GN=RABGGTB PE=1 SV=2	0.00376294	2.65679	3.32326	1	2	1	1	331	36.9	5.03		2		1
FALSE	High	Master Protein	Q5H9R7	Serine/threonine-protein phosphatase 6 regulatory subunit 3 OS=Homo sapiens GN=PPP6R3 PE=1 SV=2	0.000607903	6.05034	3.32188	3	3	3	1	873	97.608	4.6		3		3
FALSE	High	Master Protein	Q9NXW9	Alpha-ketoglutarate-dependent dioxygenase alkB homolog 4 OS=Homo sapiens GN=ALKBH4 PE=1 SV=1	0.00740741	2.30945	3.31126	1	1	1	1	302	33.816	6.67		1		1
FALSE	High	Master Protein	P19838	Nuclear factor NF-kappa-B p105 subunit OS=Homo sapiens GN=NFKB1 PE=1 SV=2	0.00158144	3.8772	3.30579	2	2	2	1	968	105.29	5.4		2		2
FALSE	High	Master Protein	Q15427	Splicing factor 3B subunit 4 OS=Homo sapiens GN=SF3B4 PE=1 SV=1	0.00299401	2.94654	3.30189	1	1	1	1	424	44.357	8.56		1		1
FALSE	High	Master Protein	Q8N122	Regulatory-associated protein of mTOR OS=Homo sapiens GN=RPTOR PE=1 SV=1	0	9.38214	3.29588	4	4	4	1	1335	148.942	6.89		4		4
FALSE	High	Master Protein	Q8TB72	Pumilio homolog 2 OS=Homo sapiens GN=PUM2 PE=1 SV=2	0	9.16191	3.2833	4	5	1	1	1066	114.145	7.08		5		4
FALSE	High	Master Protein	Q9NTK5	Obg-like ATPase 1 OS=Homo sapiens GN=OLA1 PE=1 SV=2	0.00456413	2.5123	3.28283	1	1	1	1	396	44.715	7.81		1		1
FALSE	High	Master Protein	Q16222	UDP-N-acetylhexosamine pyrophosphorylase OS=Homo sapiens GN=UAP1 PE=1 SV=3	0.00158144	3.56661	3.2567	2	2	2	1	522	58.732	6.33		2		2
FALSE	Medium	Master Protein	P20645	Cation-dependent mannose-6-phosphate receptor OS=Homo sapiens GN=M6PR PE=1 SV=1	0.0404372	1.37222	3.2491	1	1	1	1	277	30.973	5.83		1		1
FALSE	High	Master Protein	O15530	3-phosphoinositide-dependent protein kinase 1 OS=Homo sapiens GN=PDPK1 PE=1 SV=1	0.00740741	2.36633	3.23741	1	1	1	1	556	63.112	7.36		1		1
FALSE	High	Master Protein	O00541	Pescadillo homolog OS=Homo sapiens GN=PES1 PE=1 SV=1	0.000607903	4.73091	3.23129	2	2	2	1	588	67.96	7.33		2		2
FALSE	High	Master Protein	O60763	General vesicular transport factor p115 OS=Homo sapiens GN=USO1 PE=1 SV=2	0	7.61411	3.22245	3	3	3	1	962	107.828	4.91		3		3
FALSE	High	Master Protein	O75533	Splicing factor 3B subunit 1 OS=Homo sapiens GN=SF3B1 PE=1 SV=3	0	10.1144	3.22086	4	4	4	1	1304	145.738	7.09		4		4
FALSE	High	Master Protein	Q6DN90	IQ motif and SEC7 domain-containing protein 1 OS=Homo sapiens GN=IQSEC1 PE=1 SV=1	0.000607903	6.64449	3.21911	3	3	3	1	963	108.247	6.93		3		3
FALSE	High	Master Protein	Q86VR2	Protein FAM134C OS=Homo sapiens GN=FAM134C PE=1 SV=1	0.00740741	2.35301	3.21888	1	1	1	1	466	51.364	4.97		1		1
FALSE	Medium	Master Protein	O00764	Pyridoxal kinase OS=Homo sapiens GN=PDXK PE=1 SV=1	0.03415	1.4494	3.20513	1	1	1	1	312	35.08	6.13		1		1
FALSE	High	Master Protein	P00738	Haptoglobin OS=Homo sapiens GN=HP PE=1 SV=1	0.00202122	3.23433	3.20197	1	1	1	1	406	45.177	6.58		1		1
FALSE	High	Master Protein	P19022	Cadherin-2 OS=Homo sapiens GN=CDH2 PE=1 SV=4	0.000607903	4.69471	3.20088	2	2	2	1	906	99.747	4.81		2		2
FALSE	High	Master Protein	Q8IZ69	tRNA (uracil-5-)-methyltransferase homolog A OS=Homo sapiens GN=TRMT2A PE=1 SV=2	0.00158144	4.23745	3.2	2	2	2	1	625	68.682	7.94		2		2
FALSE	High	Master Protein	P08247	Synaptophysin OS=Homo sapiens GN=SYP PE=1 SV=3	0.00456413	2.57528	3.19489	1	1	1	1	313	33.823	4.81		1		1
FALSE	High	Master Protein	P25098	Beta-adrenergic receptor kinase 1 OS=Homo sapiens GN=ADRBK1 PE=1 SV=2	0.000607903	6.48024	3.19303	2	2	1	1	689	79.522	7.28		2		2
FALSE	High	Master Protein	O75146	Huntingtin-interacting protein 1-related protein OS=Homo sapiens GN=HIP1R PE=1 SV=2	0	7.36423	3.18352	3	3	3	1	1068	119.315	6.67		3		3
FALSE	Medium	Master Protein	Q99943	1-acyl-sn-glycerol-3-phosphate acyltransferase alpha OS=Homo sapiens GN=AGPAT1 PE=1 SV=2	0.0381232	1.40318	3.18021	1	1	1	1	283	31.696	9.38		1		1
FALSE	High	Master Protein	P31260	Homeobox protein Hox-A10 OS=Homo sapiens GN=HOXA10 PE=1 SV=3	0.00202122	3.22709	3.17073	1	1	1	1	410	42.388	8.34		1		1
FALSE	High	Master Protein	P43304	Glycerol-3-phosphate dehydrogenase, mitochondrial OS=Homo sapiens GN=GPD2 PE=1 SV=3	0.000607903	5.3121	3.16369	2	2	2	1	727	80.802	7.69		2		2
FALSE	Medium	Master Protein	Q96BW5	Phosphotriesterase-related protein OS=Homo sapiens GN=PTER PE=1 SV=1	0.0228063	1.64995	3.15186	1	1	1	1	349	38.993	6.52		1		1
FALSE	High	Master Protein	O95819	Mitogen-activated protein kinase kinase kinase kinase 4 OS=Homo sapiens GN=MAP4K4 PE=1 SV=2	0.000607903	5.58612	3.1477	3	3	3	1	1239	142.013	7.46		3		3
FALSE	High	Master Protein	Q13627	Dual specificity tyrosine-phosphorylation-regulated kinase 1A OS=Homo sapiens GN=DYRK1A PE=1 SV=2	0.000607903	4.62843	3.14548	2	2	2	1	763	85.53	8.75		2		2
FALSE	High	Master Protein	Q9NXE4	Sphingomyelin phosphodiesterase 4 OS=Homo sapiens GN=SMPD4 PE=1 SV=2	0.000607903	4.5353	3.14389	2	2	2	1	827	93.292	7.97		2		2
FALSE	Medium	Master Protein	Q13572	Inositol-tetrakisphosphate 1-kinase OS=Homo sapiens GN=ITPK1 PE=1 SV=2	0.0106645	1.95742	3.1401	1	1	1	1	414	45.592	6.16		1		1
FALSE	High	Master Protein	Q9BQ67	Glutamate-rich WD repeat-containing protein 1 OS=Homo sapiens GN=GRWD1 PE=1 SV=1	0.00499093	2.44843	3.13901	1	1	1	1	446	49.388	4.92		1		1
FALSE	High	Master Protein	Q14008	Cytoskeleton-associated protein 5 OS=Homo sapiens GN=CKAP5 PE=1 SV=3	0	12.7729	3.10039	5	5	5	1	2032	225.352	7.8		5		5
FALSE	High	Master Protein	Q9H2M9	Rab3 GTPase-activating protein non-catalytic subunit OS=Homo sapiens GN=RAB3GAP2 PE=1 SV=1	0	11.3015	3.08686	4	4	4	1	1393	155.886	5.62		4		4
FALSE	High	Master Protein	O15397	Importin-8 OS=Homo sapiens GN=IPO8 PE=1 SV=2	0	8.68398	3.08582	3	3	2	1	1037	119.861	5.16		3		3
FALSE	High	Master Protein	Q93009	Ubiquitin carboxyl-terminal hydrolase 7 OS=Homo sapiens GN=USP7 PE=1 SV=2	0	10.6855	3.0853	4	4	4	1	1102	128.22	5.55		4		4
FALSE	Medium	Master Protein	Q15008	26S proteasome non-ATPase regulatory subunit 6 OS=Homo sapiens GN=PSMD6 PE=1 SV=1	0.0228063	1.65797	3.08483	1	1	1	1	389	45.502	5.62		1		1
FALSE	High	Master Protein	Q9P2R3	Rabankyrin-5 OS=Homo sapiens GN=ANKFY1 PE=1 SV=2	0.000607903	5.79638	3.07956	3	3	3	1	1169	128.318	6.1		3		3
FALSE	High	Master Protein	Q8N999	Uncharacterized protein C12orf29 OS=Homo sapiens GN=C12orf29 PE=1 SV=2	0.00158144	4.16492	3.07692	1	2	1	1	325	37.466	7.06		2		1
FALSE	Medium	Master Protein	Q8IVM8	Solute carrier family 22 member 9 OS=Homo sapiens GN=SLC22A9 PE=1 SV=1	0.0425379	1.34046	3.07414	1	1	1	1	553	62.128	8.1		1		1
FALSE	High	Master Protein	Q6UUV7	CREB-regulated transcription coactivator 3 OS=Homo sapiens GN=CRTC3 PE=1 SV=2	0.00158144	3.95429	3.06947	1	1	1	1	619	66.918	6.84		1		1
FALSE	Medium	Master Protein	Q13451	Peptidyl-prolyl cis-trans isomerase FKBP5 OS=Homo sapiens GN=FKBP5 PE=1 SV=2	0.0228063	1.66575	3.06346	1	1	1	1	457	51.18	5.9		1		1
FALSE	High	Master Protein	O76021	Ribosomal L1 domain-containing protein 1 OS=Homo sapiens GN=RSL1D1 PE=1 SV=3	0.00765632	2.25845	3.06122	1	1	1	1	490	54.939	10.13		1		1
FALSE	High	Master Protein	Q9H6R4	Nucleolar protein 6 OS=Homo sapiens GN=NOL6 PE=1 SV=2	0	6.90955	3.0541	3	3	3	1	1146	127.513	7.64		3		3
FALSE	High	Master Protein	Q6P996	Pyridoxal-dependent decarboxylase domain-containing protein 1 OS=Homo sapiens GN=PDXDC1 PE=1 SV=2	0.00158144	4.31126	3.04569	2	2	2	1	788	86.652	5.38		2		2
FALSE	High	Master Protein	Q9H089	Large subunit GTPase 1 homolog OS=Homo sapiens GN=LSG1 PE=1 SV=2	0.000607903	4.47794	3.03951	2	2	2	1	658	75.178	6.38		2		2
FALSE	High	Master Protein	Q96D71	RalBP1-associated Eps domain-containing protein 1 OS=Homo sapiens GN=REPS1 PE=1 SV=3	0.00202122	3.20484	3.01508	2	2	2	1	796	86.609	5.69		2		2
FALSE	Medium	Master Protein	Q5JVF3	PCI domain-containing protein 2 OS=Homo sapiens GN=PCID2 PE=1 SV=2	0.0168404	1.7997	3.00752	1	1	1	1	399	46	8.53		1		1
FALSE	Medium	Master Protein	Q12834	Cell division cycle protein 20 homolog OS=Homo sapiens GN=CDC20 PE=1 SV=2	0.0332835	1.49336	3.00601	1	1	1	1	499	54.689	9.23		1		1
FALSE	High	Master Protein	O43290	U4/U6.U5 tri-snRNP-associated protein 1 OS=Homo sapiens GN=SART1 PE=1 SV=1	0.000607903	4.87597	3	2	2	2	1	800	90.2	6.13		2		2
FALSE	High	Master Protein	Q9Y6Y8	SEC23-interacting protein OS=Homo sapiens GN=SEC23IP PE=1 SV=1	0	7.66161	3	3	3	3	1	1000	111.007	5.54		3		3
FALSE	Medium	Master Protein	O15144	Actin-related protein 2/3 complex subunit 2 OS=Homo sapiens GN=ARPC2 PE=1 SV=1	0.0121753	1.88174	3	1	1	1	1	300	34.311	7.36		1		1
FALSE	High	Master Protein	Q9UEG4	Zinc finger protein 629 OS=Homo sapiens GN=ZNF629 PE=1 SV=2	0.00158144	3.51279	2.99194	2	2	2	1	869	96.559	7.93		2		2
FALSE	Medium	Master Protein	Q96HE7	ERO1-like protein alpha OS=Homo sapiens GN=ERO1A PE=1 SV=2	0.0351722	1.44515	2.99145	1	1	1	1	468	54.358	5.68		1		1
FALSE	High	Master Protein	O43772	Mitochondrial carnitine/acylcarnitine carrier protein OS=Homo sapiens GN=SLC25A20 PE=1 SV=1	0.00765632	2.15708	2.99003	1	1	1	1	301	32.922	9.41		1		1
FALSE	High	Master Protein	Q9Y619	Mitochondrial ornithine transporter 1 OS=Homo sapiens GN=SLC25A15 PE=1 SV=1	0.00456413	2.56463	2.99003	1	1	1	1	301	32.715	9.13		1		1
FALSE	Medium	Master Protein	Q9H0U3	Magnesium transporter protein 1 OS=Homo sapiens GN=MAGT1 PE=1 SV=1	0.0133065	1.83594	2.98507	1	1	1	1	335	38.011	9.63		1		1
FALSE	Medium	Master Protein	Q9NQZ5	StAR-related lipid transfer protein 7, mitochondrial OS=Homo sapiens GN=STARD7 PE=1 SV=2	0.0338416	1.45967	2.97297	1	1	1	1	370	43.086	8.95		1		1
FALSE	Medium	Master Protein	Q9NZN8	CCR4-NOT transcription complex subunit 2 OS=Homo sapiens GN=CNOT2 PE=1 SV=1	0.0183633	1.77495	2.96296	1	1	1	1	540	59.7	7.66		1		1
FALSE	High	Master Protein	Q05655	Protein kinase C delta type OS=Homo sapiens GN=PRKCD PE=1 SV=2	0.000607903	6.45109	2.95858	2	2	2	1	676	77.455	7.75		2		2
FALSE	Medium	Master Protein	Q9BS26	Endoplasmic reticulum resident protein 44 OS=Homo sapiens GN=ERP44 PE=1 SV=1	0.0378676	1.41805	2.95567	1	1	1	1	406	46.941	5.26		1		1
FALSE	High	Master Protein	Q32P41	tRNA (guanine(37)-N1)-methyltransferase OS=Homo sapiens GN=TRMT5 PE=1 SV=2	0.00202122	3.10807	2.94695	1	1	1	1	509	58.209	8.62		1		1
FALSE	High	Master Protein	P16520	Guanine nucleotide-binding protein G(I)/G(S)/G(T) subunit beta-3 OS=Homo sapiens GN=GNB3 PE=1 SV=1	0.00376294	2.81844	2.94118	1	1	1	1	340	37.197	5.67		1		1
FALSE	High	Master Protein	Q9ULX6	A-kinase anchor protein 8-like OS=Homo sapiens GN=AKAP8L PE=1 SV=3	0.00202122	3.14913	2.94118	2	2	2	1	646	71.604	5.07		2		2
FALSE	High	Master Protein	Q7L2H7	Eukaryotic translation initiation factor 3 subunit M OS=Homo sapiens GN=EIF3M PE=1 SV=1	0.00740741	2.27003	2.94118	1	1	1	1	374	42.476	5.63		1		1
FALSE	High	Master Protein	Q8IYB7	DIS3-like exonuclease 2 OS=Homo sapiens GN=DIS3L2 PE=1 SV=4	0.00202122	3.25254	2.93785	2	2	2	1	885	99.216	6.1		2		2
FALSE	High	Master Protein	P61201	COP9 signalosome complex subunit 2 OS=Homo sapiens GN=COPS2 PE=1 SV=1	0.00158144	3.45002	2.93454	1	1	1	1	443	51.564	5.53		1		1
FALSE	High	Master Protein	Q9P270	SLAIN motif-containing protein 2 OS=Homo sapiens GN=SLAIN2 PE=1 SV=2	0.00202122	3.28861	2.92599	1	1	1	1	581	62.505	9.45		1		1
FALSE	Medium	Master Protein	Q9BZE2	tRNA pseudouridine(38/39) synthase OS=Homo sapiens GN=PUS3 PE=1 SV=3	0.0140902	1.82798	2.9106	1	1	1	1	481	55.612	7.49		1		1
FALSE	High	Master Protein	P86790	Vacuolar fusion protein CCZ1 homolog B OS=Homo sapiens GN=CCZ1B PE=1 SV=1	0.00765632	2.21254	2.90456	1	1	1	1	482	55.83	6.48		1		1
FALSE	High	Master Protein	Q05682	Caldesmon OS=Homo sapiens GN=CALD1 PE=1 SV=3	0.00158144	3.99359	2.90038	2	2	2	1	793	93.175	5.66		2		2
FALSE	High	Master Protein	Q9UHB6	LIM domain and actin-binding protein 1 OS=Homo sapiens GN=LIMA1 PE=1 SV=1	0.000607903	4.58388	2.89855	2	3	2	1	759	85.173	6.84		3		2
FALSE	High	Master Protein	Q99661	Kinesin-like protein KIF2C OS=Homo sapiens GN=KIF2C PE=1 SV=2	0.000607903	5.0275	2.89655	2	2	1	1	725	81.261	7.83		2		2
FALSE	High	Master Protein	Q9NTJ5	Phosphatidylinositide phosphatase SAC1 OS=Homo sapiens GN=SACM1L PE=1 SV=2	0.000607903	5.43132	2.89608	2	3	2	1	587	66.924	7.12		3		2
FALSE	High	Master Protein	Q53S58	Transmembrane protein 177 OS=Homo sapiens GN=TMEM177 PE=2 SV=1	0.00795645	2.09789	2.89389	1	1	1	1	311	33.739	9.61		1		1
FALSE	High	Master Protein	Q9HCU5	Prolactin regulatory element-binding protein OS=Homo sapiens GN=PREB PE=1 SV=2	0.00718133	2.40187	2.8777	1	1	1	1	417	45.44	7.88		1		1
FALSE	High	Master Protein	P53677	AP-3 complex subunit mu-2 OS=Homo sapiens GN=AP3M2 PE=2 SV=1	0.00499093	2.45383	2.87081	1	1	1	1	418	46.947	7.56		1		1
FALSE	High	Master Protein	Q8IV48	3'-5' exoribonuclease 1 OS=Homo sapiens GN=ERI1 PE=1 SV=3	0.00299401	2.98716	2.86533	1	1	1	1	349	40.038	6.7		1		1
FALSE	High	Master Protein	P16930	Fumarylacetoacetase OS=Homo sapiens GN=FAH PE=1 SV=2	0.00765632	2.17179	2.86396	1	1	1	1	419	46.344	6.95		1		1
FALSE	High	Master Protein	Q9C0C9	(E3-independent) E2 ubiquitin-conjugating enzyme OS=Homo sapiens GN=UBE2O PE=1 SV=3	0.000607903	5.78006	2.86378	3	3	3	1	1292	141.205	5.12		3		3
FALSE	Medium	Master Protein	P53582	Methionine aminopeptidase 1 OS=Homo sapiens GN=METAP1 PE=1 SV=2	0.0273452	1.57414	2.84974	1	1	1	1	386	43.187	7.17		1		1
FALSE	Medium	Master Protein	Q96EB1	Elongator complex protein 4 OS=Homo sapiens GN=ELP4 PE=1 SV=2	0.0136986	1.83298	2.83019	1	1	1	1	424	46.558	8.51		1		1
FALSE	Medium	Master Protein	Q8WVY7	Ubiquitin-like domain-containing CTD phosphatase 1 OS=Homo sapiens GN=UBLCP1 PE=1 SV=2	0.0228063	1.65975	2.83019	1	1	1	1	318	36.781	6.46		1		1
FALSE	Medium	Master Protein	P0C7P4	Putative cytochrome b-c1 complex subunit Rieske-like protein 1 OS=Homo sapiens GN=UQCRFS1P1 PE=5 SV=1	0.0197785	1.72816	2.82686	1	1	1	1	283	30.796	8.87		1		1
FALSE	High	Master Protein	Q9H832	Ubiquitin-conjugating enzyme E2 Z OS=Homo sapiens GN=UBE2Z PE=1 SV=2	0.00910973	2.01457	2.82486	1	1	1	1	354	38.186	5.62		1		1
FALSE	Medium	Master Protein	Q5F1R6	DnaJ homolog subfamily C member 21 OS=Homo sapiens GN=DNAJC21 PE=1 SV=2	0.0183633	1.77314	2.82486	1	1	1	1	531	61.989	5.47		1		1
FALSE	High	Master Protein	Q8N5C6	S1 RNA-binding domain-containing protein 1 OS=Homo sapiens GN=SRBD1 PE=1 SV=2	0.000607903	5.2413	2.81407	3	3	3	1	995	111.705	8.72		3		3
FALSE	Medium	Master Protein	P53384	Cytosolic Fe-S cluster assembly factor NUBP1 OS=Homo sapiens GN=NUBP1 PE=1 SV=2	0.0362694	1.43914	2.8125	1	1	1	1	320	34.512	5.33		1		1
FALSE	Medium	Master Protein	Q9Y3S2	Zinc finger protein 330 OS=Homo sapiens GN=ZNF330 PE=1 SV=1	0.0253651	1.61208	2.8125	1	1	1	1	320	36.177	6.16		1		1
FALSE	High	Master Protein	Q15054	DNA polymerase delta subunit 3 OS=Homo sapiens GN=POLD3 PE=1 SV=2	0.00991736	1.99097	2.7897	1	2	1	1	466	51.368	9.35		2		1
FALSE	Medium	Master Protein	Q9BSH5	Haloacid dehalogenase-like hydrolase domain-containing protein 3 OS=Homo sapiens GN=HDHD3 PE=1 SV=1	0.0434314	1.31813	2.78884	1	1	1	1	251	27.982	6.71		1		1
FALSE	High	Master Protein	P10155	60 kDa SS-A/Ro ribonucleoprotein OS=Homo sapiens GN=TROVE2 PE=1 SV=2	0.00158144	3.49845	2.7881	2	2	2	1	538	60.631	8.03		2		2
FALSE	High	Master Protein	Q9UBC2	Epidermal growth factor receptor substrate 15-like 1 OS=Homo sapiens GN=EPS15L1 PE=1 SV=1	0.00202122	3.12244	2.77778	2	3	2	1	864	94.197	5.11		3		2
FALSE	Medium	Master Protein	Q9UMS4	Pre-mRNA-processing factor 19 OS=Homo sapiens GN=PRPF19 PE=1 SV=1	0.0456817	1.30164	2.77778	1	1	1	1	504	55.146	6.61		1		1
FALSE	High	Master Protein	Q01968	Inositol polyphosphate 5-phosphatase OCRL-1 OS=Homo sapiens GN=OCRL PE=1 SV=3	0.000607903	4.98158	2.77469	2	2	2	1	901	104.138	6.55		2		2
FALSE	High	Master Protein	Q96T88	E3 ubiquitin-protein ligase UHRF1 OS=Homo sapiens GN=UHRF1 PE=1 SV=1	0.000607903	5.96961	2.77427	2	2	2	1	793	89.757	7.56		2		2
FALSE	High	Master Protein	Q96GQ7	Probable ATP-dependent RNA helicase DDX27 OS=Homo sapiens GN=DDX27 PE=1 SV=2	0.000607903	5.00494	2.76382	2	3	2	1	796	89.779	9.28		3		2
FALSE	High	Master Protein	Q9H267	Vacuolar protein sorting-associated protein 33B OS=Homo sapiens GN=VPS33B PE=1 SV=2	0.00158144	3.94169	2.75527	2	2	2	1	617	70.54	6.71		2		2
FALSE	High	Master Protein	Q0VDF9	Heat shock 70 kDa protein 14 OS=Homo sapiens GN=HSPA14 PE=1 SV=1	0.00765632	2.20343	2.75049	1	1	1	1	509	54.76	5.59		1		1
FALSE	High	Master Protein	O43427	Acidic fibroblast growth factor intracellular-binding protein OS=Homo sapiens GN=FIBP PE=1 SV=3	0.00765632	2.1645	2.74725	1	1	1	1	364	41.851	6.48		1		1
FALSE	High	Master Protein	Q17RY0	Cytoplasmic polyadenylation element-binding protein 4 OS=Homo sapiens GN=CPEB4 PE=1 SV=1	0.00542741	2.43735	2.74348	1	1	1	1	729	80.102	7.18		1		1
FALSE	High	Master Protein	P15056	Serine/threonine-protein kinase B-raf OS=Homo sapiens GN=BRAF PE=1 SV=4	0.000607903	5.14938	2.74151	2	3	2	1	766	84.384	7.53		3		2
FALSE	High	Master Protein	O95671	N-acetylserotonin O-methyltransferase-like protein OS=Homo sapiens GN=ASMTL PE=1 SV=3	0.00250878	3.00559	2.73752	1	1	1	1	621	68.813	6.07		1		1
FALSE	High	Master Protein	Q8NBJ5	Procollagen galactosyltransferase 1 OS=Homo sapiens GN=COLGALT1 PE=1 SV=1	0.00456413	2.55878	2.73312	1	1	1	1	622	71.59	7.31		1		1
FALSE	Medium	Master Protein	Q8N0Z6	Tetratricopeptide repeat protein 5 OS=Homo sapiens GN=TTC5 PE=1 SV=2	0.0118126	1.88773	2.72727	1	1	1	1	440	48.897	6.48		1		1
FALSE	Medium	Master Protein	Q8NHV4	Protein NEDD1 OS=Homo sapiens GN=NEDD1 PE=1 SV=1	0.0228063	1.66354	2.72727	1	1	1	1	660	71.921	7.97		1		1
FALSE	High	Master Protein	Q9BZG8	Diphthamide biosynthesis protein 1 OS=Homo sapiens GN=DPH1 PE=1 SV=2	0.00456413	2.61475	2.7088	1	1	1	1	443	48.774	8.18		1		1
FALSE	Medium	Master Protein	P58004	Sestrin-2 OS=Homo sapiens GN=SESN2 PE=1 SV=1	0.0306586	1.54046	2.70833	1	1	1	1	480	54.459	5.9		1		1
FALSE	High	Master Protein	Q13616	Cullin-1 OS=Homo sapiens GN=CUL1 PE=1 SV=2	0.00202122	3.32589	2.70619	2	2	2	1	776	89.622	8		2		2
FALSE	High	Master Protein	P57737	Coronin-7 OS=Homo sapiens GN=CORO7 PE=1 SV=2	0.000607903	5.65954	2.7027	2	2	2	1	925	100.542	5.8		2		2
FALSE	Medium	Master Protein	Q9Y399	28S ribosomal protein S2, mitochondrial OS=Homo sapiens GN=MRPS2 PE=1 SV=1	0.021594	1.68888	2.7027	1	1	1	1	296	33.228	9.26		1		1
FALSE	High	Master Protein	Q9ULP9	TBC1 domain family member 24 OS=Homo sapiens GN=TBC1D24 PE=1 SV=2	0.00376294	2.81446	2.68336	1	1	1	1	559	62.879	7.36		1		1
FALSE	High	Master Protein	Q1KMD3	Heterogeneous nuclear ribonucleoprotein U-like protein 2 OS=Homo sapiens GN=HNRNPUL2 PE=1 SV=1	0.00158144	3.48107	2.67738	2	2	2	1	747	85.052	4.91		2		2
FALSE	High	Master Protein	P47712	Cytosolic phospholipase A2 OS=Homo sapiens GN=PLA2G4A PE=1 SV=2	0.00158144	3.84571	2.67023	2	2	2	1	749	85.184	5.38		2		2
FALSE	High	Master Protein	P57081	tRNA (guanine-N(7)-)-methyltransferase non-catalytic subunit WDR4 OS=Homo sapiens GN=WDR4 PE=1 SV=2	0.00202122	3.09713	2.6699	1	1	1	1	412	45.461	7.11		1		1
FALSE	High	Master Protein	Q6SJ96	TATA box-binding protein-like protein 2 OS=Homo sapiens GN=TBPL2 PE=2 SV=1	0.00376294	2.79022	2.66667	1	1	1	1	375	41.498	6.43		1		1
FALSE	High	Master Protein	O95363	Phenylalanine--tRNA ligase, mitochondrial OS=Homo sapiens GN=FARS2 PE=1 SV=1	0.00456413	2.57823	2.66075	1	1	1	1	451	52.324	7.46		1		1
FALSE	High	Master Protein	Q9BQC3	Diphthamide biosynthesis protein 2 OS=Homo sapiens GN=DPH2 PE=1 SV=1	0.00376294	2.73802	2.65849	1	1	1	1	489	52.05	5.53		1		1
FALSE	Medium	Master Protein	Q12765	Secernin-1 OS=Homo sapiens GN=SCRN1 PE=1 SV=2	0.0401021	1.37304	2.657	1	1	1	1	414	46.353	4.75		1		1
FALSE	High	Master Protein	Q8TEQ6	Gem-associated protein 5 OS=Homo sapiens GN=GEMIN5 PE=1 SV=3	0	11.1099	2.65252	4	4	4	1	1508	168.483	6.62		4		4
FALSE	High	Master Protein	Q6P4I2	WD repeat-containing protein 73 OS=Homo sapiens GN=WDR73 PE=1 SV=1	0.00765632	2.16247	2.6455	1	1	1	1	378	41.659	5.78		1		1
FALSE	Medium	Master Protein	Q9NWL6	Asparagine synthetase domain-containing protein 1 OS=Homo sapiens GN=ASNSD1 PE=2 SV=2	0.0171863	1.78357	2.64386	1	1	1	1	643	72.034	6.83		1		1
FALSE	High	Master Protein	Q14160	Protein scribble homolog OS=Homo sapiens GN=SCRIB PE=1 SV=4	0	10.6645	2.63804	4	4	4	1	1630	174.778	5.07		4		4
FALSE	Medium	Master Protein	Q92925	SWI/SNF-related matrix-associated actin-dependent regulator of chromatin subfamily D member 2 OS=Homo sapiens GN=SMARCD2 PE=1 SV=3	0.023175	1.64512	2.63653	1	1	1	1	531	58.884	9.64		1		1
FALSE	High	Master Protein	Q16531	DNA damage-binding protein 1 OS=Homo sapiens GN=DDB1 PE=1 SV=1	0.00376294	2.76195	2.63158	1	1	1	1	1140	126.887	5.26		1		1
FALSE	High	Master Protein	Q9BTV5	Fibronectin type III and SPRY domain-containing protein 1 OS=Homo sapiens GN=FSD1 PE=1 SV=1	0.00158144	3.83357	2.62097	1	1	1	1	496	55.784	6.99		1		1
FALSE	Medium	Master Protein	Q9HC36	rRNA methyltransferase 3, mitochondrial OS=Homo sapiens GN=RNMTL1 PE=1 SV=2	0.0332835	1.47664	2.61905	1	1	1	1	420	46.99	8.73		1		1
FALSE	High	Master Protein	P21283	V-type proton ATPase subunit C 1 OS=Homo sapiens GN=ATP6V1C1 PE=1 SV=4	0.00765632	2.21211	2.6178	1	1	1	1	382	43.914	7.46		1		1
FALSE	Medium	Master Protein	Q9H7B2	Ribosome production factor 2 homolog OS=Homo sapiens GN=RPF2 PE=1 SV=2	0.0190779	1.75203	2.61438	1	1	1	1	306	35.56	9.99		1		1
FALSE	High	Master Protein	Q96ME1	F-box/LRR-repeat protein 18 OS=Homo sapiens GN=FBXL18 PE=1 SV=2	0.000607903	4.65612	2.6087	2	2	2	1	805	88.284	8.32		2		2
FALSE	High	Master Protein	Q4G176	Acyl-CoA synthetase family member 3, mitochondrial OS=Homo sapiens GN=ACSF3 PE=1 SV=3	0.00376294	2.75995	2.60417	1	1	1	1	576	64.089	8.37		1		1
FALSE	High	Master Protein	Q58A45	PAB-dependent poly(A)-specific ribonuclease subunit PAN3 OS=Homo sapiens GN=PAN3 PE=1 SV=3	0.00158144	4.23519	2.59301	2	2	2	1	887	95.552	8.57		2		2
FALSE	High	Master Protein	Q7Z434	Mitochondrial antiviral-signaling protein OS=Homo sapiens GN=MAVS PE=1 SV=2	0.00202122	3.13271	2.59259	1	1	1	1	540	56.493	5.52		1		1
FALSE	Medium	Master Protein	Q7Z4G4	tRNA (guanine(10)-N2)-methyltransferase homolog OS=Homo sapiens GN=TRMT11 PE=1 SV=1	0.0212097	1.69293	2.59179	1	1	1	1	463	53.387	7.78		1		1
FALSE	High	Master Protein	Q9H0V9	VIP36-like protein OS=Homo sapiens GN=LMAN2L PE=1 SV=1	0.00299401	2.9535	2.58621	1	1	1	1	348	39.685	8.38		1		1
FALSE	High	Master Protein	Q2TAL8	Glutamine-rich protein 1 OS=Homo sapiens GN=QRICH1 PE=1 SV=1	0.000607903	5.31219	2.57732	2	2	2	1	776	86.382	5.87		2		2
FALSE	High	Master Protein	Q9NTZ6	RNA-binding protein 12 OS=Homo sapiens GN=RBM12 PE=1 SV=1	0.000607903	5.03488	2.57511	2	2	2	1	932	97.333	8.63		2		2
FALSE	High	Master Protein	P17612	cAMP-dependent protein kinase catalytic subunit alpha OS=Homo sapiens GN=PRKACA PE=1 SV=2	0.00765632	2.13626	2.5641	1	1	1	1	351	40.564	8.79		1		1
FALSE	Medium	Master Protein	O15372	Eukaryotic translation initiation factor 3 subunit H OS=Homo sapiens GN=EIF3H PE=1 SV=1	0.0415913	1.35409	2.55682	1	1	1	1	352	39.905	6.54		1		1
FALSE	Medium	Master Protein	Q53T59	HCLS1-binding protein 3 OS=Homo sapiens GN=HS1BP3 PE=1 SV=1	0.0434314	1.31948	2.55102	1	1	1	1	392	42.754	5.01		1		1
FALSE	High	Master Protein	Q96J02	E3 ubiquitin-protein ligase Itchy homolog OS=Homo sapiens GN=ITCH PE=1 SV=2	0.000607903	5.54664	2.54707	2	2	2	1	903	102.738	6.3		2		2
FALSE	High	Master Protein	Q8IW35	Centrosomal protein of 97 kDa OS=Homo sapiens GN=CEP97 PE=1 SV=1	0.000607903	5.29686	2.54335	2	2	2	1	865	96.921	5.02		2		2
FALSE	High	Master Protein	Q7KZI7	Serine/threonine-protein kinase MARK2 OS=Homo sapiens GN=MARK2 PE=1 SV=2	0.000607903	4.90496	2.53807	2	2	2	1	788	87.856	9.72		2		2
FALSE	High	Master Protein	Q96GA3	Protein LTV1 homolog OS=Homo sapiens GN=LTV1 PE=1 SV=1	0.00342801	2.91435	2.52632	1	1	1	1	475	54.821	4.91		1		1
FALSE	High	Master Protein	Q15392	Delta(24)-sterol reductase OS=Homo sapiens GN=DHCR24 PE=1 SV=2	0.00250878	3.00573	2.51938	1	1	1	1	516	60.062	8.16		1		1
FALSE	High	Master Protein	Q8N2K0	Monoacylglycerol lipase ABHD12 OS=Homo sapiens GN=ABHD12 PE=1 SV=2	0.00202122	3.37345	2.51256	1	1	1	1	398	45.068	8.65		1		1
FALSE	High	Master Protein	Q06265	Exosome complex component RRP45 OS=Homo sapiens GN=EXOSC9 PE=1 SV=3	0.00456413	2.58336	2.50569	1	1	1	1	439	48.918	5.29		1		1
FALSE	High	Master Protein	P98194	Calcium-transporting ATPase type 2C member 1 OS=Homo sapiens GN=ATP2C1 PE=1 SV=3	0.00158144	4.37085	2.50272	2	2	2	1	919	100.512	6.74		2		2
FALSE	High	Master Protein	O94967	WD repeat-containing protein 47 OS=Homo sapiens GN=WDR47 PE=1 SV=1	0.000607903	4.66927	2.50272	2	2	2	1	919	101.884	5.94		2		2
FALSE	High	Master Protein	Q01581	Hydroxymethylglutaryl-CoA synthase, cytoplasmic OS=Homo sapiens GN=HMGCS1 PE=1 SV=2	0.00499093	2.44418	2.5	1	1	1	1	520	57.257	5.41		1		1
FALSE	Medium	Master Protein	Q9BXS6	Nucleolar and spindle-associated protein 1 OS=Homo sapiens GN=NUSAP1 PE=1 SV=1	0.0114099	1.89177	2.49433	1	1	1	1	441	49.422	9.91		1		1
FALSE	High	Master Protein	Q6P1M0	Long-chain fatty acid transport protein 4 OS=Homo sapiens GN=SLC27A4 PE=1 SV=1	0.00158144	4.18185	2.48834	2	2	2	1	643	72.018	8.47		2		2
FALSE	High	Master Protein	Q15477	Helicase SKI2W OS=Homo sapiens GN=SKIV2L PE=1 SV=3	0.000607903	5.27235	2.48796	2	2	2	1	1246	137.668	6.06		2		2
FALSE	High	Master Protein	Q9BPU6	Dihydropyrimidinase-related protein 5 OS=Homo sapiens GN=DPYSL5 PE=1 SV=1	0.00158144	3.63972	2.48227	1	2	1	1	564	61.382	7.2		2		1
FALSE	High	Master Protein	P35249	Replication factor C subunit 4 OS=Homo sapiens GN=RFC4 PE=1 SV=2	0.00376294	2.82218	2.47934	1	1	1	1	363	39.657	8.02		1		1
FALSE	High	Master Protein	Q9NX46	Poly(ADP-ribose) glycohydrolase ARH3 OS=Homo sapiens GN=ADPRHL2 PE=1 SV=1	0.00740741	2.3465	2.47934	1	1	1	1	363	38.922	5.07		1		1
FALSE	High	Master Protein	Q9BW85	Coiled-coil domain-containing protein 94 OS=Homo sapiens GN=CCDC94 PE=1 SV=1	0.00795645	2.09501	2.47678	1	1	1	1	323	37.063	5.92		1		1
FALSE	High	Master Protein	P78310	Coxsackievirus and adenovirus receptor OS=Homo sapiens GN=CXADR PE=1 SV=1	0.00740741	2.35232	2.46575	1	1	1	1	365	40.004	7.56		1		1
FALSE	High	Master Protein	Q15042	Rab3 GTPase-activating protein catalytic subunit OS=Homo sapiens GN=RAB3GAP1 PE=1 SV=3	0.000607903	5.02939	2.44648	2	2	2	1	981	110.454	5.55		2		2
FALSE	High	Master Protein	O94966	Ubiquitin carboxyl-terminal hydrolase 19 OS=Homo sapiens GN=USP19 PE=1 SV=2	0	8.14962	2.42792	3	4	3	1	1318	145.559	6.28		4		3
FALSE	High	Master Protein	Q8TD16	Protein bicaudal D homolog 2 OS=Homo sapiens GN=BICD2 PE=1 SV=1	0.00158144	3.95528	2.42718	2	2	2	1	824	93.476	5.44		2		2
FALSE	High	Master Protein	O95352	Ubiquitin-like modifier-activating enzyme ATG7 OS=Homo sapiens GN=ATG7 PE=1 SV=1	0.00376294	2.71489	2.41821	1	1	1	1	703	77.909	6.24		1		1
FALSE	High	Master Protein	Q8IW75	Serpin A12 OS=Homo sapiens GN=SERPINA12 PE=1 SV=1	0.00456413	2.47795	2.41546	1	1	1	1	414	47.145	9.29		1		1
FALSE	High	Master Protein	P40818	Ubiquitin carboxyl-terminal hydrolase 8 OS=Homo sapiens GN=USP8 PE=1 SV=1	0.00158144	3.44891	2.41503	2	2	2	1	1118	127.444	8.51		2		2
FALSE	High	Master Protein	Q2M2I8	AP2-associated protein kinase 1 OS=Homo sapiens GN=AAK1 PE=1 SV=3	0.00120192	4.384	2.39334	2	2	2	1	961	103.821	6.6		2		2
FALSE	Medium	Master Protein	Q9BY41	Histone deacetylase 8 OS=Homo sapiens GN=HDAC8 PE=1 SV=2	0.0373245	1.43664	2.38727	1	1	1	1	377	41.731	5.63		1		1
FALSE	High	Master Protein	Q16850	Lanosterol 14-alpha demethylase OS=Homo sapiens GN=CYP51A1 PE=1 SV=3	0.00456413	2.51442	2.38569	1	1	1	1	503	56.769	8.53		1		1
FALSE	High	Master Protein	P05556	Integrin beta-1 OS=Homo sapiens GN=ITGB1 PE=1 SV=2	0.000607903	5.008	2.38095	2	2	2	1	798	88.357	5.39		2		2
FALSE	Medium	Master Protein	O00635	E3 ubiquitin-protein ligase TRIM38 OS=Homo sapiens GN=TRIM38 PE=1 SV=1	0.0197785	1.73826	2.36559	1	1	1	1	465	53.381	7.02		1		1
FALSE	Medium	Master Protein	Q9Y316	Protein MEMO1 OS=Homo sapiens GN=MEMO1 PE=1 SV=1	0.0351722	1.44009	2.3569	1	1	1	1	297	33.711	7.14		1		1
FALSE	Medium	Master Protein	Q8N806	Putative E3 ubiquitin-protein ligase UBR7 OS=Homo sapiens GN=UBR7 PE=1 SV=2	0.0434314	1.32258	2.35294	1	1	1	1	425	47.968	4.81		1		1
FALSE	High	Master Protein	Q49A26	Putative oxidoreductase GLYR1 OS=Homo sapiens GN=GLYR1 PE=1 SV=3	0.00202122	3.2855	2.35081	1	1	1	1	553	60.518	9.17		1		1
FALSE	Medium	Master Protein	Q8IZV5	Retinol dehydrogenase 10 OS=Homo sapiens GN=RDH10 PE=1 SV=1	0.023175	1.64532	2.34604	1	1	1	1	341	38.062	7.4		1		1
FALSE	High	Master Protein	Q7L099	Protein RUFY3 OS=Homo sapiens GN=RUFY3 PE=1 SV=1	0.00376294	2.65975	2.34542	1	1	1	1	469	52.931	5.49		1		1
FALSE	High	Master Protein	P13196	5-aminolevulinate synthase, nonspecific, mitochondrial OS=Homo sapiens GN=ALAS1 PE=1 SV=2	0.00456413	2.49662	2.34375	1	1	1	1	640	70.536	8.46		1		1
FALSE	High	Master Protein	O14617	AP-3 complex subunit delta-1 OS=Homo sapiens GN=AP3D1 PE=1 SV=1	0.000607903	5.69108	2.34172	2	2	2	1	1153	130.076	8.48		2		2
FALSE	Medium	Master Protein	Q8NFQ8	Torsin-1A-interacting protein 2 OS=Homo sapiens GN=TOR1AIP2 PE=1 SV=1	0.0106645	1.9393	2.34043	1	1	1	1	470	51.232	4.96		1		1
FALSE	High	Master Protein	Q92973	Transportin-1 OS=Homo sapiens GN=TNPO1 PE=1 SV=2	0.00202122	3.18168	2.33853	2	2	2	1	898	102.289	4.98		2		2
FALSE	Medium	Master Protein	Q8WUA7	TBC1 domain family member 22A OS=Homo sapiens GN=TBC1D22A PE=1 SV=2	0.0110294	1.90728	2.32108	1	1	1	1	517	59.084	5.97		1		1
FALSE	High	Master Protein	Q2NKX8	DNA excision repair protein ERCC-6-like OS=Homo sapiens GN=ERCC6L PE=1 SV=1	0	6.76046	2.32	2	2	2	1	1250	141.015	5.31		2		2
FALSE	High	Master Protein	Q7L3T8	Probable proline--tRNA ligase, mitochondrial OS=Homo sapiens GN=PARS2 PE=1 SV=1	0.00376294	2.65267	2.31579	1	1	1	1	475	53.228	8.1		1		1
FALSE	High	Master Protein	Q9H6Q4	Cytosolic Fe-S cluster assembly factor NARFL OS=Homo sapiens GN=NARFL PE=1 SV=1	0.00456413	2.56944	2.31092	1	1	1	1	476	52.987	7.23		1		1
FALSE	High	Master Protein	Q8IVS2	Malonyl-CoA-acyl carrier protein transacylase, mitochondrial OS=Homo sapiens GN=MCAT PE=1 SV=2	0.00342801	2.93592	2.30769	1	1	1	1	390	42.934	8.72		1		1
FALSE	Medium	Master Protein	P46734	Dual specificity mitogen-activated protein kinase kinase 3 OS=Homo sapiens GN=MAP2K3 PE=1 SV=2	0.0411059	1.36401	2.30548	1	1	1	1	347	39.293	7.43		1		1
FALSE	High	Master Protein	A1X283	SH3 and PX domain-containing protein 2B OS=Homo sapiens GN=SH3PXD2B PE=1 SV=3	0.00158144	3.70924	2.30516	2	2	1	1	911	101.516	8.69		2		2
FALSE	High	Master Protein	Q9H0C8	Integrin-linked kinase-associated serine/threonine phosphatase 2C OS=Homo sapiens GN=ILKAP PE=1 SV=1	0.00456413	2.55533	2.29592	1	1	1	1	392	42.88	7.09		1		1
FALSE	High	Master Protein	Q9Y6G9	Cytoplasmic dynein 1 light intermediate chain 1 OS=Homo sapiens GN=DYNC1LI1 PE=1 SV=3	0.00456413	2.55721	2.29446	1	1	1	1	523	56.544	6.42		1		1
FALSE	Medium	Master Protein	Q12849	G-rich sequence factor 1 OS=Homo sapiens GN=GRSF1 PE=1 SV=3	0.0171863	1.78648	2.29167	1	1	1	1	480	53.093	6.19		1		1
FALSE	High	Master Protein	Q9BWS9	Chitinase domain-containing protein 1 OS=Homo sapiens GN=CHID1 PE=1 SV=1	0.00765632	2.25532	2.29008	1	1	1	1	393	44.912	8.63		1		1
FALSE	High	Master Protein	Q16181	Septin-7 OS=Homo sapiens GN=SEPT7 PE=1 SV=2	0.00202122	3.10729	2.28833	1	1	1	1	437	50.648	8.63		1		1
FALSE	High	Master Protein	P48556	26S proteasome non-ATPase regulatory subunit 8 OS=Homo sapiens GN=PSMD8 PE=1 SV=2	0.00765632	2.17561	2.28571	1	1	1	1	350	39.587	9.7		1		1
FALSE	High	Master Protein	Q6PKG0	La-related protein 1 OS=Homo sapiens GN=LARP1 PE=1 SV=2	0.00158144	4.25884	2.28102	2	2	2	1	1096	123.434	8.82		2		2
FALSE	Medium	Master Protein	Q9BPY3	Protein FAM118B OS=Homo sapiens GN=FAM118B PE=1 SV=1	0.0267891	1.58586	2.2792	1	1	1	1	351	39.474	5.99		1		1
FALSE	High	Master Protein	Q99959	Plakophilin-2 OS=Homo sapiens GN=PKP2 PE=1 SV=2	0.00158144	3.52578	2.27015	1	1	1	1	881	97.355	9.33		1		1
FALSE	High	Master Protein	Q96CU9	FAD-dependent oxidoreductase domain-containing protein 1 OS=Homo sapiens GN=FOXRED1 PE=1 SV=2	0.00376294	2.82857	2.26337	1	1	1	1	486	53.778	7.78		1		1
FALSE	High	Master Protein	Q9NSV4	Protein diaphanous homolog 3 OS=Homo sapiens GN=DIAPH3 PE=1 SV=4	0.000607903	4.71225	2.2632	3	3	3	1	1193	136.839	7.03		3		3
FALSE	High	Master Protein	O95628	CCR4-NOT transcription complex subunit 4 OS=Homo sapiens GN=CNOT4 PE=1 SV=3	0.00158144	4.09453	2.26087	1	1	1	1	575	63.47	7.03		1		1
FALSE	High	Master Protein	Q96EK9	Protein KTI12 homolog OS=Homo sapiens GN=KTI12 PE=1 SV=1	0.00876461	2.06616	2.25989	1	1	1	1	354	38.592	6.95		1		1
FALSE	Medium	Master Protein	Q658P3	Metalloreductase STEAP3 OS=Homo sapiens GN=STEAP3 PE=1 SV=2	0.0197785	1.72839	2.2541	1	1	1	1	488	54.566	8.6		1		1
FALSE	High	Master Protein	Q9NV06	DDB1- and CUL4-associated factor 13 OS=Homo sapiens GN=DCAF13 PE=1 SV=2	0.00765632	2.23033	2.24719	1	1	1	1	445	51.369	9.19		1		1
FALSE	High	Master Protein	O95140	Mitofusin-2 OS=Homo sapiens GN=MFN2 PE=1 SV=3	0.00120192	4.41567	2.24571	2	2	2	1	757	86.347	6.98		2		2
FALSE	High	Master Protein	O94776	Metastasis-associated protein MTA2 OS=Homo sapiens GN=MTA2 PE=1 SV=1	0.00158144	3.41533	2.24551	1	1	1	1	668	74.976	9.66		1		1
FALSE	High	Master Protein	Q96I25	Splicing factor 45 OS=Homo sapiens GN=RBM17 PE=1 SV=1	0.00910973	2.00815	2.24439	1	1	1	1	401	44.934	5.97		1		1
FALSE	High	Master Protein	Q9H4L7	SWI/SNF-related matrix-associated actin-dependent regulator of chromatin subfamily A containing DEAD/H box 1 OS=Homo sapiens GN=SMARCAD1 PE=1 SV=2	0.00158144	3.95242	2.24172	2	2	2	1	1026	117.328	5.55		2		2
FALSE	High	Master Protein	Q6NSW5	Protein FAM45B OS=Homo sapiens GN=FAM45B PE=2 SV=1	0.00765632	2.19798	2.2409	1	1	1	1	357	40.488	6.54		1		1
FALSE	Medium	Master Protein	P43378	Tyrosine-protein phosphatase non-receptor type 9 OS=Homo sapiens GN=PTPN9 PE=1 SV=1	0.0273452	1.58236	2.19224	1	1	1	1	593	67.977	8.02		1		1
FALSE	Medium	Master Protein	O00567	Nucleolar protein 56 OS=Homo sapiens GN=NOP56 PE=1 SV=4	0.0273452	1.57381	2.18855	1	1	1	1	594	66.009	9.19		1		1
FALSE	High	Master Protein	Q9Y5T5	Ubiquitin carboxyl-terminal hydrolase 16 OS=Homo sapiens GN=USP16 PE=1 SV=1	0.00202122	3.05189	2.18712	2	2	2	1	823	93.511	6.93		2		2
FALSE	High	Master Protein	Q9NVI1	Fanconi anemia group I protein OS=Homo sapiens GN=FANCI PE=1 SV=4	0.000607903	5.7132	2.18373	3	3	3	1	1328	149.229	6.74		3		3
FALSE	High	Master Protein	P24928	DNA-directed RNA polymerase II subunit RPB1 OS=Homo sapiens GN=POLR2A PE=1 SV=2	0	11.6752	2.18274	3	4	3	1	1970	217.039	7.37		4		3
FALSE	High	Master Protein	P34897	Serine hydroxymethyltransferase, mitochondrial OS=Homo sapiens GN=SHMT2 PE=1 SV=3	0.00910973	2.02072	2.18254	1	1	1	1	504	55.958	8.53		1		1
FALSE	High	Master Protein	Q96K76	Ubiquitin carboxyl-terminal hydrolase 47 OS=Homo sapiens GN=USP47 PE=1 SV=3	0.00158144	3.8906	2.18182	2	2	2	1	1375	157.212	5.08		2		2
FALSE	Medium	Master Protein	Q9UQB8	Brain-specific angiogenesis inhibitor 1-associated protein 2 OS=Homo sapiens GN=BAIAP2 PE=1 SV=1	0.0381232	1.40187	2.17391	1	1	1	1	552	60.83	8.9		1		1
FALSE	Medium	Master Protein	Q12948	Forkhead box protein C1 OS=Homo sapiens GN=FOXC1 PE=1 SV=3	0.0208251	1.69357	2.16998	1	1	1	1	553	56.753	8.51		1		1
FALSE	High	Master Protein	O94804	Serine/threonine-protein kinase 10 OS=Homo sapiens GN=STK10 PE=1 SV=1	0.00120192	4.44867	2.16942	2	3	1	1	968	112.065	6.95		3		2
FALSE	High	Master Protein	Q13480	GRB2-associated-binding protein 1 OS=Homo sapiens GN=GAB1 PE=1 SV=2	0.00202122	3.36643	2.16138	1	1	1	1	694	76.569	5.96		1		1
FALSE	High	Master Protein	P09622	Dihydrolipoyl dehydrogenase, mitochondrial OS=Homo sapiens GN=DLD PE=1 SV=2	0.00158144	3.43262	2.1611	1	1	1	1	509	54.143	7.85		1		1
FALSE	Medium	Master Protein	P49821	NADH dehydrogenase [ubiquinone] flavoprotein 1, mitochondrial OS=Homo sapiens GN=NDUFV1 PE=1 SV=4	0.0106645	1.97102	2.15517	1	1	1	1	464	50.785	8.21		1		1
FALSE	High	Master Protein	Q9UHR4	Brain-specific angiogenesis inhibitor 1-associated protein 2-like protein 1 OS=Homo sapiens GN=BAIAP2L1 PE=1 SV=2	0.00456413	2.62452	2.15264	1	1	1	1	511	56.847	8.68		1		1
FALSE	Medium	Master Protein	Q9C0D3	Protein zyg-11 homolog B OS=Homo sapiens GN=ZYG11B PE=1 SV=2	0.027683	1.56575	2.15054	1	1	1	1	744	83.867	6.86		1		1
FALSE	Medium	Master Protein	P80303	Nucleobindin-2 OS=Homo sapiens GN=NUCB2 PE=1 SV=2	0.0187251	1.767	2.14286	1	1	1	1	420	50.164	5.12		1		1
FALSE	High	Master Protein	Q9UPN9	E3 ubiquitin-protein ligase TRIM33 OS=Homo sapiens GN=TRIM33 PE=1 SV=3	0.000607903	5.31412	2.12955	2	2	2	1	1127	122.456	6.67		2		2
FALSE	Medium	Master Protein	Q8IX04	Ubiquitin-conjugating enzyme E2 variant 3 OS=Homo sapiens GN=UEVLD PE=1 SV=2	0.0110294	1.92336	2.12314	1	1	1	1	471	52.231	7.09		1		1
FALSE	High	Master Protein	Q96RQ1	Endoplasmic reticulum-Golgi intermediate compartment protein 2 OS=Homo sapiens GN=ERGIC2 PE=1 SV=2	0.00718133	2.40428	2.12202	1	1	1	1	377	42.521	6.77		1		1
FALSE	High	Master Protein	Q6UX07	Dehydrogenase/reductase SDR family member 13 OS=Homo sapiens GN=DHRS13 PE=2 SV=1	0.00795645	2.11458	2.12202	1	1	1	1	377	40.823	7.69		1		1
FALSE	High	Master Protein	O75113	NEDD4-binding protein 1 OS=Homo sapiens GN=N4BP1 PE=1 SV=4	0.00158144	3.9543	2.12054	2	2	2	1	896	100.316	5.36		2		2
FALSE	High	Master Protein	Q96RK4	Bardet-Biedl syndrome 4 protein OS=Homo sapiens GN=BBS4 PE=1 SV=2	0.00795645	2.09383	2.11946	1	1	1	1	519	58.245	7.31		1		1
FALSE	Medium	Master Protein	Q14653	Interferon regulatory factor 3 OS=Homo sapiens GN=IRF3 PE=1 SV=1	0.0219608	1.68508	2.10773	1	1	1	1	427	47.19	5.34		1		1
FALSE	High	Master Protein	Q96S55	ATPase WRNIP1 OS=Homo sapiens GN=WRNIP1 PE=1 SV=2	0.00456413	2.49417	2.10526	1	1	1	1	665	72.088	6.1		1		1
FALSE	High	Master Protein	Q12959	Disks large homolog 1 OS=Homo sapiens GN=DLG1 PE=1 SV=2	0.00158144	4.2962	2.10177	2	2	2	1	904	100.393	5.76		2		2
FALSE	High	Master Protein	Q9UDY2	Tight junction protein ZO-2 OS=Homo sapiens GN=TJP2 PE=1 SV=2	0.000607903	5.58246	2.10084	2	2	2	1	1190	133.876	7.4		2		2
FALSE	Medium	Master Protein	Q92905	COP9 signalosome complex subunit 5 OS=Homo sapiens GN=COPS5 PE=1 SV=4	0.0473984	1.27556	2.09581	1	1	1	1	334	37.555	6.54		1		1
FALSE	High	Master Protein	O95985	DNA topoisomerase 3-beta-1 OS=Homo sapiens GN=TOP3B PE=1 SV=1	0.000607903	5.27712	2.08817	2	2	2	1	862	96.599	8.12		2		2
FALSE	High	Master Protein	Q9HD20	Manganese-transporting ATPase 13A1 OS=Homo sapiens GN=ATP13A1 PE=1 SV=2	0.00120192	4.43985	2.07641	2	2	2	1	1204	132.87	8.13		2		2
FALSE	High	Master Protein	Q5T160	Probable arginine--tRNA ligase, mitochondrial OS=Homo sapiens GN=RARS2 PE=1 SV=1	0.00795645	2.0942	2.07612	1	1	1	1	578	65.464	8.21		1		1
FALSE	Medium	Master Protein	O43913	Origin recognition complex subunit 5 OS=Homo sapiens GN=ORC5 PE=1 SV=1	0.0387427	1.38977	2.06897	1	1	1	1	435	50.251	7.74		1		1
FALSE	High	Master Protein	Q9H8Y5	Ankyrin repeat and zinc finger domain-containing protein 1 OS=Homo sapiens GN=ANKZF1 PE=1 SV=1	0.00456413	2.48865	2.06612	1	1	1	1	726	80.877	8.41		1		1
FALSE	High	Master Protein	Q9Y2K7	Lysine-specific demethylase 2A OS=Homo sapiens GN=KDM2A PE=1 SV=3	0.000607903	6.20428	2.0654	2	3	2	1	1162	132.708	7.58		3		2
FALSE	High	Master Protein	Q13686	DNA oxidative demethylase ALKBH1 OS=Homo sapiens GN=ALKBH1 PE=1 SV=2	0.00876461	2.07613	2.05656	1	1	1	1	389	43.804	7.08		1		1
FALSE	High	Master Protein	Q9NZN3	EH domain-containing protein 3 OS=Homo sapiens GN=EHD3 PE=1 SV=2	0.00202122	3.37458	2.05607	1	1	1	1	535	60.849	6.57		1		1
FALSE	High	Master Protein	Q99707	Methionine synthase OS=Homo sapiens GN=MTR PE=1 SV=2	0.000607903	4.81643	2.05534	2	2	2	1	1265	140.437	5.58		2		2
FALSE	High	Master Protein	P08237	ATP-dependent 6-phosphofructokinase, muscle type OS=Homo sapiens GN=PFKM PE=1 SV=2	0.00158144	3.5291	2.05128	2	2	2	1	780	85.128	7.99		2		2
FALSE	High	Master Protein	Q9BZL6	Serine/threonine-protein kinase D2 OS=Homo sapiens GN=PRKD2 PE=1 SV=2	0.00158144	3.77978	2.05011	2	2	2	1	878	96.689	6.84		2		2
FALSE	High	Master Protein	O14641	Segment polarity protein dishevelled homolog DVL-2 OS=Homo sapiens GN=DVL2 PE=1 SV=1	0.00456413	2.54197	2.03804	1	1	1	1	736	78.899	6.02		1		1
FALSE	Medium	Master Protein	Q96LD4	Tripartite motif-containing protein 47 OS=Homo sapiens GN=TRIM47 PE=1 SV=2	0.0110294	1.92628	2.03762	1	1	1	1	638	69.488	6.44		1		1
FALSE	High	Master Protein	Q9BSC4	Nucleolar protein 10 OS=Homo sapiens GN=NOL10 PE=1 SV=1	0.00876461	2.07702	2.03488	1	1	1	1	688	80.251	8.46		1		1
FALSE	Medium	Master Protein	P32455	Guanylate-binding protein 1 OS=Homo sapiens GN=GBP1 PE=1 SV=2	0.0228063	1.65014	2.02703	1	1	1	1	592	67.888	6.32		1		1
FALSE	High	Master Protein	Q96HR8	H/ACA ribonucleoprotein complex non-core subunit NAF1 OS=Homo sapiens GN=NAF1 PE=1 SV=2	0.00202122	3.26704	2.02429	1	1	1	1	494	53.683	4.87		1		1
FALSE	High	Master Protein	Q9UK59	Lariat debranching enzyme OS=Homo sapiens GN=DBR1 PE=1 SV=2	0.00586643	2.41908	2.02206	1	1	1	1	544	61.516	5.47		1		1
FALSE	High	Master Protein	Q14166	Tubulin--tyrosine ligase-like protein 12 OS=Homo sapiens GN=TTLL12 PE=1 SV=2	0.00158144	3.74216	2.01863	2	2	2	1	644	74.356	5.53		2		2
FALSE	High	Master Protein	Q8NI27	THO complex subunit 2 OS=Homo sapiens GN=THOC2 PE=1 SV=2	0	8.22783	2.00879	3	3	3	1	1593	182.659	8.44		3		3
FALSE	High	Master Protein	Q9BXB4	Oxysterol-binding protein-related protein 11 OS=Homo sapiens GN=OSBPL11 PE=1 SV=2	0.00158144	3.46814	2.00803	1	1	1	1	747	83.591	7.06		1		1
FALSE	Medium	Master Protein	Q14181	DNA polymerase alpha subunit B OS=Homo sapiens GN=POLA2 PE=1 SV=2	0.0335821	1.46942	2.00669	1	1	1	1	598	65.906	5.24		1		1
FALSE	High	Master Protein	Q16352	Alpha-internexin OS=Homo sapiens GN=INA PE=1 SV=2	0.00765632	2.13283	2.00401	1	1	1	1	499	55.357	5.4		1		1
FALSE	High	Master Protein	Q9NUY8	TBC1 domain family member 23 OS=Homo sapiens GN=TBC1D23 PE=1 SV=3	0.00202122	3.33255	2.00286	1	2	1	1	699	78.272	5.41		2		1
FALSE	High	Master Protein	Q5SRE5	Nucleoporin NUP188 homolog OS=Homo sapiens GN=NUP188 PE=1 SV=1	0.000607903	6.33466	2.00114	3	3	3	1	1749	195.917	6.73		3		3
FALSE	High	Master Protein	Q8NHQ9	ATP-dependent RNA helicase DDX55 OS=Homo sapiens GN=DDX55 PE=1 SV=3	0.00765632	2.1303	2	1	1	1	1	600	68.503	9.25		1		1
FALSE	High	Master Protein	O75718	Cartilage-associated protein OS=Homo sapiens GN=CRTAP PE=1 SV=1	0.00718133	2.38987	1.99501	1	1	1	1	401	46.532	5.73		1		1
FALSE	Medium	Master Protein	Q9UNP9	Peptidyl-prolyl cis-trans isomerase E OS=Homo sapiens GN=PPIE PE=1 SV=1	0.0456817	1.29809	1.99336	1	2	1	1	301	33.41	5.6		2		1
FALSE	High	Master Protein	Q13496	Myotubularin OS=Homo sapiens GN=MTM1 PE=1 SV=2	0.00342801	2.84588	1.99005	1	1	1	1	603	69.888	8.18		1		1
FALSE	High	Master Protein	Q9NW82	WD repeat-containing protein 70 OS=Homo sapiens GN=WDR70 PE=1 SV=1	0.00342801	2.87746	1.98777	1	1	1	1	654	73.155	6.33		1		1
FALSE	Medium	Master Protein	P61011	Signal recognition particle 54 kDa protein OS=Homo sapiens GN=SRP54 PE=1 SV=1	0.0384334	1.39761	1.98413	1	1	1	1	504	55.668	8.75		1		1
FALSE	Medium	Master Protein	Q9UEY8	Gamma-adducin OS=Homo sapiens GN=ADD3 PE=1 SV=1	0.0106645	1.94808	1.983	1	1	1	1	706	79.105	6.32		1		1
FALSE	Medium	Master Protein	Q7L8L6	FAST kinase domain-containing protein 5 OS=Homo sapiens GN=FASTKD5 PE=1 SV=1	0.0381232	1.40539	1.96335	1	1	1	1	764	86.519	8.13		1		1
FALSE	High	Master Protein	Q96N67	Dedicator of cytokinesis protein 7 OS=Homo sapiens GN=DOCK7 PE=1 SV=4	0.000607903	6.18957	1.96262	4	4	4	1	2140	242.407	6.8		4		4
FALSE	Medium	Master Protein	Q00796	Sorbitol dehydrogenase OS=Homo sapiens GN=SORD PE=1 SV=4	0.0242962	1.63658	1.96078	1	1	1	1	357	38.3	7.97		1		1
FALSE	High	Master Protein	Q93052	Lipoma-preferred partner OS=Homo sapiens GN=LPP PE=1 SV=1	0.00158144	4.32938	1.96078	1	1	1	1	612	65.704	7.37		1		1
FALSE	Medium	Master Protein	Q9UG56	Phosphatidylserine decarboxylase proenzyme OS=Homo sapiens GN=PISD PE=2 SV=4	0.0415913	1.35389	1.95599	1	1	1	1	409	46.642	9.42		1		1
FALSE	Medium	Master Protein	Q9BVL4	Selenoprotein O OS=Homo sapiens GN=SELO PE=2 SV=3	0.0242962	1.63922	1.9432	1	1	1	1	669	73.444	5.97		1		1
FALSE	Medium	Master Protein	Q13356	Peptidyl-prolyl cis-trans isomerase-like 2 OS=Homo sapiens GN=PPIL2 PE=1 SV=1	0.0110294	1.90798	1.92308	1	1	1	1	520	58.787	8.78		1		1
FALSE	Medium	Master Protein	Q16875	6-phosphofructo-2-kinase/fructose-2,6-bisphosphatase 3 OS=Homo sapiens GN=PFKFB3 PE=1 SV=1	0.0133065	1.84863	1.92308	1	1	1	1	520	59.571	8.21		1		1
FALSE	High	Master Protein	Q96S59	Ran-binding protein 9 OS=Homo sapiens GN=RANBP9 PE=1 SV=1	0.00542741	2.43878	1.92044	1	1	1	1	729	77.798	6.79		1		1
FALSE	Medium	Master Protein	Q99504	Eyes absent homolog 3 OS=Homo sapiens GN=EYA3 PE=1 SV=3	0.0114099	1.89347	1.91972	1	1	1	1	573	62.624	5.21		1		1
FALSE	High	Master Protein	Q9ULT8	E3 ubiquitin-protein ligase HECTD1 OS=Homo sapiens GN=HECTD1 PE=1 SV=3	0	12.4212	1.91571	5	5	5	1	2610	289.203	5.35		5		5
FALSE	High	Master Protein	Q16625	Occludin OS=Homo sapiens GN=OCLN PE=1 SV=1	0.00376294	2.65384	1.91571	1	1	1	1	522	59.106	6.09		1		1
FALSE	High	Master Protein	Q9Y3I1	F-box only protein 7 OS=Homo sapiens GN=FBXO7 PE=1 SV=1	0.00991736	1.99611	1.91571	1	1	1	1	522	58.466	6.55		1		1
FALSE	High	Master Protein	Q96RF0	Sorting nexin-18 OS=Homo sapiens GN=SNX18 PE=1 SV=2	0.00910973	2.04374	1.91083	1	1	1	1	628	68.851	5.68		1		1
FALSE	High	Master Protein	O14976	Cyclin-G-associated kinase OS=Homo sapiens GN=GAK PE=1 SV=2	0.000607903	5.91158	1.90694	2	2	2	1	1311	143.1	5.73		2		2
FALSE	High	Master Protein	O75886	Signal transducing adapter molecule 2 OS=Homo sapiens GN=STAM2 PE=1 SV=1	0.00202122	3.25368	1.90476	1	1	1	1	525	58.128	5.07		1		1
FALSE	Medium	Master Protein	Q14258	E3 ubiquitin/ISG15 ligase TRIM25 OS=Homo sapiens GN=TRIM25 PE=1 SV=2	0.0171863	1.78995	1.90476	1	1	1	1	630	70.928	8.09		1		1
FALSE	Medium	Master Protein	P18754	Regulator of chromosome condensation OS=Homo sapiens GN=RCC1 PE=1 SV=1	0.0156627	1.80771	1.90024	1	1	1	1	421	44.941	7.52		1		1
FALSE	High	Master Protein	Q9UI42	Carboxypeptidase A4 OS=Homo sapiens GN=CPA4 PE=1 SV=2	0.00795645	2.10685	1.90024	1	1	1	1	421	47.322	6.7		1		1
FALSE	High	Master Protein	Q92667	A-kinase anchor protein 1, mitochondrial OS=Homo sapiens GN=AKAP1 PE=1 SV=1	0.00376294	2.75995	1.88261	1	1	1	1	903	97.281	4.94		1		1
FALSE	High	Master Protein	Q8TB52	F-box only protein 30 OS=Homo sapiens GN=FBXO30 PE=1 SV=3	0.00158144	3.88739	1.87919	1	1	1	1	745	82.251	5.4		1		1
FALSE	Medium	Master Protein	Q15629	Translocating chain-associated membrane protein 1 OS=Homo sapiens GN=TRAM1 PE=1 SV=3	0.0171863	1.78781	1.87166	1	1	1	1	374	43.044	9.63		1		1
FALSE	High	Master Protein	Q96F45	Zinc finger protein 503 OS=Homo sapiens GN=ZNF503 PE=1 SV=1	0.000607903	4.72515	1.85759	1	1	1	1	646	62.516	8.7		1		1
FALSE	High	Master Protein	Q9UQR0	Sex comb on midleg-like protein 2 OS=Homo sapiens GN=SCML2 PE=1 SV=1	0.00342801	2.84558	1.85714	1	1	1	1	700	77.208	8.54		1		1
FALSE	Medium	Master Protein	P57772	Selenocysteine-specific elongation factor OS=Homo sapiens GN=EEFSEC PE=1 SV=4	0.0110294	1.90904	1.84564	1	1	1	1	596	65.263	8.35		1		1
FALSE	High	Master Protein	O14974	Protein phosphatase 1 regulatory subunit 12A OS=Homo sapiens GN=PPP1R12A PE=1 SV=1	0.00158144	3.58479	1.84466	2	2	2	1	1030	115.211	5.4		2		2
FALSE	Medium	Master Protein	O15355	Protein phosphatase 1G OS=Homo sapiens GN=PPM1G PE=1 SV=1	0.0136986	1.8315	1.8315	1	1	1	1	546	59.235	4.36		1		1
FALSE	Medium	Master Protein	Q9NY93	Probable ATP-dependent RNA helicase DDX56 OS=Homo sapiens GN=DDX56 PE=1 SV=1	0.0378676	1.42159	1.82815	1	1	1	1	547	61.551	9.26		1		1
FALSE	Medium	Master Protein	Q99956	Dual specificity protein phosphatase 9 OS=Homo sapiens GN=DUSP9 PE=1 SV=1	0.0144695	1.81616	1.82292	1	1	1	1	384	41.841	6.11		1		1
FALSE	High	Master Protein	P50416	Carnitine O-palmitoyltransferase 1, liver isoform OS=Homo sapiens GN=CPT1A PE=1 SV=2	0.00158144	4.15864	1.81113	1	1	1	1	773	88.311	8.65		1		1
FALSE	Medium	Master Protein	Q96KC8	DnaJ homolog subfamily C member 1 OS=Homo sapiens GN=DNAJC1 PE=1 SV=1	0.0228063	1.67613	1.80505	1	1	1	1	554	63.843	8.63		1		1
FALSE	High	Master Protein	Q8N8A6	ATP-dependent RNA helicase DDX51 OS=Homo sapiens GN=DDX51 PE=1 SV=3	0.00376294	2.79615	1.8018	1	1	1	1	666	72.413	8.16		1		1
FALSE	High	Master Protein	Q9BWU1	Cyclin-dependent kinase 19 OS=Homo sapiens GN=CDK19 PE=1 SV=1	0.00910973	2.04364	1.79283	1	1	1	1	502	56.767	8.53		1		1
FALSE	High	Master Protein	Q6PGP7	Tetratricopeptide repeat protein 37 OS=Homo sapiens GN=TTC37 PE=1 SV=1	0.000607903	5.98079	1.79028	2	2	2	1	1564	175.375	7.53		2		2
FALSE	High	Master Protein	Q5T1V6	Probable ATP-dependent RNA helicase DDX59 OS=Homo sapiens GN=DDX59 PE=1 SV=1	0.00499093	2.44636	1.77706	1	1	1	1	619	68.766	7.44		1		1
FALSE	High	Master Protein	Q9UJV9	Probable ATP-dependent RNA helicase DDX41 OS=Homo sapiens GN=DDX41 PE=1 SV=2	0.00499093	2.44624	1.76849	1	1	1	1	622	69.793	6.84		1		1
FALSE	High	Master Protein	O15287	Fanconi anemia group G protein OS=Homo sapiens GN=FANCG PE=1 SV=1	0.00740741	2.29508	1.76849	1	1	1	1	622	68.511	5.47		1		1
FALSE	High	Master Protein	Q96SU4	Oxysterol-binding protein-related protein 9 OS=Homo sapiens GN=OSBPL9 PE=1 SV=2	0.00158144	3.57365	1.7663	1	1	1	1	736	83.132	6.18		1		1
FALSE	High	Master Protein	P35573	Glycogen debranching enzyme OS=Homo sapiens GN=AGL PE=1 SV=3	0.00158144	3.95678	1.7624	2	2	2	1	1532	174.652	6.76		2		2
FALSE	High	Master Protein	Q9UHQ1	Nuclear prelamin A recognition factor OS=Homo sapiens GN=NARF PE=1 SV=1	0.00795645	2.09264	1.75439	1	1	1	1	456	51.124	7.08		1		1
FALSE	High	Master Protein	Q96MM6	Heat shock 70 kDa protein 12B OS=Homo sapiens GN=HSPA12B PE=1 SV=2	0.00456413	2.62324	1.74927	1	1	1	1	686	75.64	8.53		1		1
FALSE	High	Master Protein	Q9Y4C1	Lysine-specific demethylase 3A OS=Homo sapiens GN=KDM3A PE=1 SV=4	0.000607903	6.57249	1.74111	2	2	2	1	1321	147.248	8.07		2		2
FALSE	Medium	Master Protein	Q6PCT2	F-box/LRR-repeat protein 19 OS=Homo sapiens GN=FBXL19 PE=1 SV=3	0.0168404	1.80327	1.72911	1	1	1	1	694	75.659	9.17		1		1
FALSE	High	Master Protein	Q15650	Activating signal cointegrator 1 OS=Homo sapiens GN=TRIP4 PE=1 SV=4	0.00376294	2.74256	1.72117	1	1	1	1	581	66.105	7.85		1		1
FALSE	High	Master Protein	Q15797	Mothers against decapentaplegic homolog 1 OS=Homo sapiens GN=SMAD1 PE=1 SV=1	0.00456413	2.49771	1.72043	1	1	1	1	465	52.226	7.31		1		1
FALSE	High	Master Protein	O14545	TRAF-type zinc finger domain-containing protein 1 OS=Homo sapiens GN=TRAFD1 PE=1 SV=1	0.00876461	2.05745	1.71821	1	1	1	1	582	64.8	5.29		1		1
FALSE	High	Master Protein	O43933	Peroxisome biogenesis factor 1 OS=Homo sapiens GN=PEX1 PE=1 SV=1	0.00158144	3.77634	1.71473	2	2	2	1	1283	142.778	6.33		2		2
FALSE	High	Master Protein	Q9NUQ3	Gamma-taxilin OS=Homo sapiens GN=TXLNG PE=1 SV=2	0.00299401	2.95742	1.70455	1	1	1	1	528	60.548	7.52		1		1
FALSE	High	Master Protein	O60343	TBC1 domain family member 4 OS=Homo sapiens GN=TBC1D4 PE=1 SV=2	0.000607903	4.79536	1.69492	2	2	2	1	1298	146.471	7.01		2		2
FALSE	Medium	Master Protein	Q14680	Maternal embryonic leucine zipper kinase OS=Homo sapiens GN=MELK PE=1 SV=3	0.0148654	1.81135	1.68971	1	1	1	1	651	74.594	8.72		1		1
FALSE	Medium	Master Protein	Q8WXI9	Transcriptional repressor p66-beta OS=Homo sapiens GN=GATAD2B PE=1 SV=1	0.0171863	1.78463	1.68634	1	1	1	1	593	65.22	9.7		1		1
FALSE	Medium	Master Protein	P28749	Retinoblastoma-like protein 1 OS=Homo sapiens GN=RBL1 PE=1 SV=3	0.0387427	1.39041	1.68539	1	1	1	1	1068	120.77	7.5		1		1
FALSE	Medium	Master Protein	Q92990	Glomulin OS=Homo sapiens GN=GLMN PE=1 SV=2	0.0456817	1.30417	1.6835	1	1	1	1	594	68.165	5.33		1		1
FALSE	High	Master Protein	Q96TA2	ATP-dependent zinc metalloprotease YME1L1 OS=Homo sapiens GN=YME1L1 PE=1 SV=2	0.00202122	3.11816	1.68176	1	1	1	1	773	86.401	8.76		1		1
FALSE	Medium	Master Protein	Q9H3G5	Probable serine carboxypeptidase CPVL OS=Homo sapiens GN=CPVL PE=1 SV=2	0.0463789	1.28517	1.68067	1	1	1	1	476	54.129	5.62		1		1
FALSE	High	Master Protein	Q5VYK3	Proteasome-associated protein ECM29 homolog OS=Homo sapiens GN=ECM29 PE=1 SV=2	0.000607903	5.42163	1.68022	2	2	2	1	1845	204.16	7.12		2		2
FALSE	High	Master Protein	P56270	Myc-associated zinc finger protein OS=Homo sapiens GN=MAZ PE=1 SV=1	0.00910973	2.01493	1.67715	1	1	1	1	477	48.576	8.95		1		1
FALSE	High	Master Protein	Q8IX18	Probable ATP-dependent RNA helicase DHX40 OS=Homo sapiens GN=DHX40 PE=1 SV=2	0.00250878	3.04494	1.66881	1	1	1	1	779	88.504	8.65		1		1
FALSE	High	Master Protein	Q5TA45	Integrator complex subunit 11 OS=Homo sapiens GN=CPSF3L PE=1 SV=2	0.00740741	2.32827	1.66667	1	1	1	1	600	67.619	8.06		1		1
FALSE	Medium	Master Protein	Q96SZ6	CDK5 regulatory subunit-associated protein 1 OS=Homo sapiens GN=CDK5RAP1 PE=1 SV=2	0.0228063	1.65092	1.66389	1	1	1	1	601	67.646	8.21		1		1
FALSE	High	Master Protein	P09884	DNA polymerase alpha catalytic subunit OS=Homo sapiens GN=POLA1 PE=1 SV=2	0.00202122	3.11729	1.64159	2	2	2	1	1462	165.807	5.85		2		2
FALSE	High	Master Protein	P13798	Acylamino-acid-releasing enzyme OS=Homo sapiens GN=APEH PE=1 SV=4	0.00158144	4.08751	1.63934	1	1	1	1	732	81.173	5.48		1		1
FALSE	Medium	Master Protein	Q92636	Protein FAN OS=Homo sapiens GN=NSMAF PE=1 SV=2	0.0332835	1.47496	1.63577	1	1	1	1	917	104.306	6.23		1		1
FALSE	High	Master Protein	P11388	DNA topoisomerase 2-alpha OS=Homo sapiens GN=TOP2A PE=1 SV=3	0.00158144	4.20757	1.63292	2	3	1	1	1531	174.276	8.72		3		2
FALSE	High	Master Protein	Q13485	Mothers against decapentaplegic homolog 4 OS=Homo sapiens GN=SMAD4 PE=1 SV=1	0.00202122	3.30901	1.63043	1	1	1	1	552	60.401	6.99		1		1
FALSE	High	Master Protein	O00255	Menin OS=Homo sapiens GN=MEN1 PE=1 SV=4	0.00456413	2.58922	1.62602	1	1	1	1	615	67.981	6.55		1		1
FALSE	Medium	Master Protein	Q86TI2	Dipeptidyl peptidase 9 OS=Homo sapiens GN=DPP9 PE=1 SV=3	0.0171863	1.78489	1.62225	1	1	1	1	863	98.201	6.46		1		1
FALSE	High	Master Protein	Q99570	Phosphoinositide 3-kinase regulatory subunit 4 OS=Homo sapiens GN=PIK3R4 PE=1 SV=3	0.00120192	4.44367	1.62003	2	2	2	1	1358	153.007	7.17		2		2
FALSE	High	Master Protein	Q9H2G2	STE20-like serine/threonine-protein kinase OS=Homo sapiens GN=SLK PE=1 SV=1	0.000607903	4.85453	1.61943	2	3	1	1	1235	142.607	5.15		3		2
FALSE	Medium	Master Protein	Q8IXI2	Mitochondrial Rho GTPase 1 OS=Homo sapiens GN=RHOT1 PE=1 SV=2	0.0197785	1.744	1.61812	1	1	1	1	618	70.739	6.27		1		1
FALSE	High	Master Protein	Q9Y4J8	Dystrobrevin alpha OS=Homo sapiens GN=DTNA PE=1 SV=2	0.00376294	2.77937	1.61507	1	1	1	1	743	83.848	6.89		1		1
FALSE	High	Master Protein	P06744	Glucose-6-phosphate isomerase OS=Homo sapiens GN=GPI PE=1 SV=4	0.00765632	2.14758	1.6129	1	1	1	1	558	63.107	8.32		1		1
FALSE	High	Master Protein	Q6VN20	Ran-binding protein 10 OS=Homo sapiens GN=RANBP10 PE=1 SV=1	0.00376294	2.65561	1.6129	1	1	1	1	620	67.214	6.77		1		1
FALSE	High	Master Protein	P51003	Poly(A) polymerase alpha OS=Homo sapiens GN=PAPOLA PE=1 SV=4	0.00158144	3.67944	1.61074	1	1	1	1	745	82.791	7.37		1		1
FALSE	High	Master Protein	O60294	tRNA wybutosine-synthesizing protein 4 OS=Homo sapiens GN=LCMT2 PE=1 SV=3	0.00542741	2.4389	1.6035	1	2	1	1	686	75.554	6.73		2		1
FALSE	High	Master Protein	O43823	A-kinase anchor protein 8 OS=Homo sapiens GN=AKAP8 PE=1 SV=1	0.00765632	2.19368	1.5896	1	1	1	1	692	76.061	5.15		1		1
FALSE	Medium	Master Protein	Q14697	Neutral alpha-glucosidase AB OS=Homo sapiens GN=GANAB PE=1 SV=3	0.0114099	1.88975	1.58898	1	1	1	1	944	106.807	6.14		1		1
FALSE	High	Master Protein	Q5TCZ1	SH3 and PX domain-containing protein 2A OS=Homo sapiens GN=SH3PXD2A PE=1 SV=1	0.00158144	3.5249	1.5887	2	2	1	1	1133	125.213	8.9		2		2
FALSE	Medium	Master Protein	P51956	Serine/threonine-protein kinase Nek3 OS=Homo sapiens GN=NEK3 PE=1 SV=2	0.0456817	1.29234	1.58103	1	1	1	1	506	57.668	7.17		1		1
FALSE	High	Master Protein	Q9Y672	Dolichyl pyrophosphate Man9GlcNAc2 alpha-1,3-glucosyltransferase OS=Homo sapiens GN=ALG6 PE=1 SV=1	0.00740741	2.27181	1.57791	1	1	1	1	507	58.142	8.46		1		1
FALSE	Medium	Master Protein	P12694	2-oxoisovalerate dehydrogenase subunit alpha, mitochondrial OS=Homo sapiens GN=BCKDHA PE=1 SV=2	0.0171863	1.78861	1.57303	1	1	1	1	445	50.439	8.27		1		1
FALSE	High	Master Protein	Q15021	Condensin complex subunit 1 OS=Homo sapiens GN=NCAPD2 PE=1 SV=3	0.000607903	4.95407	1.57031	3	3	3	1	1401	157.082	6.61		3		3
FALSE	High	Master Protein	P33527	Multidrug resistance-associated protein 1 OS=Homo sapiens GN=ABCC1 PE=1 SV=3	0.000607903	5.10032	1.5676	2	2	2	1	1531	171.481	7.11		2		2
FALSE	Medium	Master Protein	P50542	Peroxisomal targeting signal 1 receptor OS=Homo sapiens GN=PEX5 PE=1 SV=3	0.0387427	1.38998	1.56495	1	1	1	1	639	70.821	4.54		1		1
FALSE	High	Master Protein	Q08945	FACT complex subunit SSRP1 OS=Homo sapiens GN=SSRP1 PE=1 SV=1	0.00456413	2.47018	1.55148	1	1	1	1	709	81.024	6.87		1		1
FALSE	Medium	Master Protein	Q96D09	G-protein coupled receptor-associated sorting protein 2 OS=Homo sapiens GN=GPRASP2 PE=1 SV=1	0.0200708	1.71467	1.55131	1	1	1	1	838	93.715	5.01		1		1
FALSE	Medium	Master Protein	Q15031	Probable leucine--tRNA ligase, mitochondrial OS=Homo sapiens GN=LARS2 PE=1 SV=2	0.0228063	1.65896	1.55039	1	1	1	1	903	101.911	8.22		1		1
FALSE	Medium	Master Protein	Q8NBF6	Late secretory pathway protein AVL9 homolog OS=Homo sapiens GN=AVL9 PE=1 SV=1	0.0332835	1.47508	1.54321	1	1	1	1	648	71.902	6.21		1		1
FALSE	High	Master Protein	Q96JM7	Lethal(3)malignant brain tumor-like protein 3 OS=Homo sapiens GN=L3MBTL3 PE=1 SV=2	0.0083717	2.08056	1.53846	1	1	1	1	780	88.28	6.46		1		1
FALSE	Medium	Master Protein	Q9UI26	Importin-11 OS=Homo sapiens GN=IPO11 PE=1 SV=1	0.0456817	1.29269	1.53846	1	1	1	1	975	112.463	5.25		1		1
FALSE	Medium	Master Protein	P23443	Ribosomal protein S6 kinase beta-1 OS=Homo sapiens GN=RPS6KB1 PE=1 SV=2	0.0121753	1.88273	1.52381	1	1	1	1	525	59.102	6.65		1		1
FALSE	High	Master Protein	Q9H900	Protein zwilch homolog OS=Homo sapiens GN=ZWILCH PE=1 SV=2	0.00456413	2.59998	1.52284	1	1	1	1	591	67.172	6.27		1		1
FALSE	Medium	Master Protein	Q6UWE0	E3 ubiquitin-protein ligase LRSAM1 OS=Homo sapiens GN=LRSAM1 PE=1 SV=1	0.0106645	1.96059	1.52144	1	1	1	1	723	83.541	5.94		1		1
FALSE	High	Master Protein	Q8N1B4	Vacuolar protein sorting-associated protein 52 homolog OS=Homo sapiens GN=VPS52 PE=1 SV=1	0.00158144	3.57626	1.52144	1	1	1	1	723	82.17	5.99		1		1
FALSE	High	Master Protein	Q9H6T0	Epithelial splicing regulatory protein 2 OS=Homo sapiens GN=ESRP2 PE=1 SV=1	0.00250878	3.03626	1.51307	1	1	1	1	727	78.351	6.71		1		1
FALSE	High	Master Protein	A8MUK1	Ubiquitin carboxyl-terminal hydrolase 17-like protein 5 OS=Homo sapiens GN=USP17L5 PE=3 SV=2	0.00740741	2.3536	1.50943	1	2	1	1	530	59.645	8.07		2		1
FALSE	High	Master Protein	Q9UBT7	Alpha-catulin OS=Homo sapiens GN=CTNNAL1 PE=1 SV=2	0.00202122	3.27992	1.49864	1	1	1	1	734	81.845	6.64		1		1
FALSE	High	Master Protein	Q9UNX4	WD repeat-containing protein 3 OS=Homo sapiens GN=WDR3 PE=1 SV=1	0.00765632	2.24535	1.48462	1	1	1	1	943	106.032	6.64		1		1
FALSE	High	Master Protein	Q86YR5	G-protein-signaling modulator 1 OS=Homo sapiens GN=GPSM1 PE=1 SV=2	0.00158144	3.48004	1.48148	1	1	1	1	675	74.464	6.54		1		1
FALSE	Medium	Master Protein	O96017	Serine/threonine-protein kinase Chk2 OS=Homo sapiens GN=CHEK2 PE=1 SV=1	0.0351722	1.44177	1.4733	1	1	1	1	543	60.877	5.91		1		1
FALSE	Medium	Master Protein	Q01780	Exosome component 10 OS=Homo sapiens GN=EXOSC10 PE=1 SV=2	0.0376384	1.42806	1.46893	1	1	1	1	885	100.768	8.46		1		1
FALSE	Medium	Master Protein	Q9UKF6	Cleavage and polyadenylation specificity factor subunit 3 OS=Homo sapiens GN=CPSF3 PE=1 SV=1	0.0412744	1.36241	1.46199	1	1	1	1	684	77.436	5.6		1		1
FALSE	High	Master Protein	Q9NWZ5	Uridine-cytidine kinase-like 1 OS=Homo sapiens GN=UCKL1 PE=1 SV=2	0.00718133	2.39416	1.45985	1	1	1	1	548	61.103	7.36		1		1
FALSE	Medium	Master Protein	Q96QG7	Myotubularin-related protein 9 OS=Homo sapiens GN=MTMR9 PE=1 SV=1	0.0273452	1.58269	1.45719	1	1	1	1	549	63.421	6.39		1		1
FALSE	High	Master Protein	Q9UDY8	Mucosa-associated lymphoid tissue lymphoma translocation protein 1 OS=Homo sapiens GN=MALT1 PE=1 SV=1	0.00158144	4.1405	1.45631	1	1	1	1	824	92.213	5.73		1		1
FALSE	Medium	Master Protein	O14727	Apoptotic protease-activating factor 1 OS=Homo sapiens GN=APAF1 PE=1 SV=2	0.0106645	1.9535	1.44231	1	1	1	1	1248	141.749	6.4		1		1
FALSE	High	Master Protein	Q8WY54	Protein phosphatase 1E OS=Homo sapiens GN=PPM1E PE=1 SV=2	0.00250878	3.04542	1.43979	1	1	1	1	764	84.948	5.03		1		1
FALSE	High	Master Protein	Q9NVH1	DnaJ homolog subfamily C member 11 OS=Homo sapiens GN=DNAJC11 PE=1 SV=2	0.00376294	2.81248	1.43113	1	1	1	1	559	63.239	8.4		1		1
FALSE	Medium	Master Protein	Q52M93	Zinc finger protein 585B OS=Homo sapiens GN=ZNF585B PE=2 SV=1	0.0378676	1.41544	1.43043	1	1	1	1	769	88.009	9.04		1		1
FALSE	Medium	Master Protein	P22570	NADPH:adrenodoxin oxidoreductase, mitochondrial OS=Homo sapiens GN=FDXR PE=1 SV=3	0.0428829	1.33753	1.42566	1	1	1	1	491	53.803	8.44		1		1
FALSE	Medium	Master Protein	Q9H8V3	Protein ECT2 OS=Homo sapiens GN=ECT2 PE=1 SV=4	0.0197785	1.74256	1.42232	1	1	1	1	914	103.439	7.71		1		1
FALSE	High	Master Protein	Q9UIG0	Tyrosine-protein kinase BAZ1B OS=Homo sapiens GN=BAZ1B PE=1 SV=2	0.000607903	4.57739	1.41605	2	2	1	1	1483	170.796	8.48		2		2
FALSE	Medium	Master Protein	P48506	Glutamate--cysteine ligase catalytic subunit OS=Homo sapiens GN=GCLC PE=1 SV=2	0.0106645	1.96537	1.41287	1	1	1	1	637	72.719	6.09		1		1
FALSE	High	Master Protein	O94830	Phospholipase DDHD2 OS=Homo sapiens GN=DDHD2 PE=1 SV=2	0.00456413	2.56703	1.40647	1	1	1	1	711	80.98	5.39		1		1
FALSE	High	Master Protein	Q5VWG9	Transcription initiation factor TFIID subunit 3 OS=Homo sapiens GN=TAF3 PE=1 SV=1	0.00202122	3.11833	1.39935	1	1	1	1	929	103.517	9.06		1		1
FALSE	High	Master Protein	Q9GZR7	ATP-dependent RNA helicase DDX24 OS=Homo sapiens GN=DDX24 PE=1 SV=1	0.00499093	2.44213	1.39697	1	1	1	1	859	96.271	9.06		1		1
FALSE	Medium	Master Protein	O94889	Kelch-like protein 18 OS=Homo sapiens GN=KLHL18 PE=1 SV=3	0.0219608	1.68382	1.39373	1	1	1	1	574	63.597	5.6		1		1
FALSE	High	Master Protein	Q3LXA3	Triokinase/FMN cyclase OS=Homo sapiens GN=TKFC PE=1 SV=2	0.00456413	2.47289	1.3913	1	1	1	1	575	58.91	7.49		1		1
FALSE	Medium	Master Protein	Q8WXE1	ATR-interacting protein OS=Homo sapiens GN=ATRIP PE=1 SV=1	0.0422535	1.34505	1.39064	1	1	1	1	791	85.783	6.32		1		1
FALSE	High	Master Protein	Q13144	Translation initiation factor eIF-2B subunit epsilon OS=Homo sapiens GN=EIF2B5 PE=1 SV=3	0.00376294	2.7263	1.38696	1	1	1	1	721	80.329	5.08		1		1
FALSE	Medium	Master Protein	Q15776	Zinc finger protein with KRAB and SCAN domains 8 OS=Homo sapiens GN=ZKSCAN8 PE=1 SV=2	0.0412744	1.35853	1.38408	1	1	1	1	578	65.775	7.39		1		1
FALSE	High	Master Protein	Q9NZ08	Endoplasmic reticulum aminopeptidase 1 OS=Homo sapiens GN=ERAP1 PE=1 SV=3	0.00342801	2.93442	1.38151	1	1	1	1	941	107.166	6.46		1		1
FALSE	High	Master Protein	Q96IV0	Peptide-N(4)-(N-acetyl-beta-glucosaminyl)asparagine amidase OS=Homo sapiens GN=NGLY1 PE=1 SV=1	0.00765632	2.18662	1.37615	1	1	1	1	654	74.343	6.89		1		1
FALSE	High	Master Protein	Q07157	Tight junction protein ZO-1 OS=Homo sapiens GN=TJP1 PE=1 SV=3	0.000607903	5.10814	1.373	2	2	2	1	1748	195.34	6.7		2		2
FALSE	Medium	Master Protein	Q9NZJ0	Denticleless protein homolog OS=Homo sapiens GN=DTL PE=1 SV=3	0.0125506	1.8768	1.36986	1	1	1	1	730	79.417	8.87		1		1
FALSE	Medium	Master Protein	P23368	NAD-dependent malic enzyme, mitochondrial OS=Homo sapiens GN=ME2 PE=1 SV=1	0.0204403	1.69962	1.36986	1	1	1	1	584	65.402	7.61		1		1
FALSE	Medium	Master Protein	Q8NFF5	FAD synthase OS=Homo sapiens GN=FLAD1 PE=1 SV=1	0.0451613	1.31229	1.36286	1	1	1	1	587	65.224	6.93		1		1
FALSE	High	Master Protein	P13807	Glycogen [starch] synthase, muscle OS=Homo sapiens GN=GYS1 PE=1 SV=2	0.00158144	3.49703	1.35685	1	1	1	1	737	83.732	6.18		1		1
FALSE	Medium	Master Protein	Q96TA1	Niban-like protein 1 OS=Homo sapiens GN=FAM129B PE=1 SV=3	0.0125506	1.8617	1.34048	1	1	1	1	746	84.085	6.19		1		1
FALSE	Medium	Master Protein	Q9BW19	Kinesin-like protein KIFC1 OS=Homo sapiens GN=KIFC1 PE=1 SV=2	0.0140902	1.82681	1.3373	1	1	1	1	673	73.702	8.98		1		1
FALSE	Medium	Master Protein	Q9HAU4	E3 ubiquitin-protein ligase SMURF2 OS=Homo sapiens GN=SMURF2 PE=1 SV=1	0.0121753	1.8824	1.3369	1	1	1	1	748	86.142	7.96		1		1
FALSE	Medium	Master Protein	P35221	Catenin alpha-1 OS=Homo sapiens GN=CTNNA1 PE=1 SV=1	0.0456817	1.2993	1.3245	1	1	1	1	906	100.009	6.29		1		1
FALSE	High	Master Protein	Q9Y4R8	Telomere length regulation protein TEL2 homolog OS=Homo sapiens GN=TELO2 PE=1 SV=2	0.00718133	2.39545	1.31422	1	1	1	1	837	91.689	5.76		1		1
FALSE	High	Master Protein	Q9NRZ9	Lymphoid-specific helicase OS=Homo sapiens GN=HELLS PE=1 SV=1	0.00202122	3.29611	1.31265	1	1	1	1	838	97.012	7.93		1		1
FALSE	High	Master Protein	Q8NE71	ATP-binding cassette sub-family F member 1 OS=Homo sapiens GN=ABCF1 PE=1 SV=2	0.00342801	2.93405	1.30178	1	1	1	1	845	95.866	6.8		1		1
FALSE	High	Master Protein	Q9BZJ0	Crooked neck-like protein 1 OS=Homo sapiens GN=CRNKL1 PE=1 SV=4	0.00202122	3.21261	1.29717	1	1	1	1	848	100.389	8		1		1
FALSE	High	Master Protein	O14936	Peripheral plasma membrane protein CASK OS=Homo sapiens GN=CASK PE=1 SV=3	0.00765632	2.17121	1.2959	1	1	1	1	926	105.056	6.43		1		1
FALSE	High	Master Protein	Q9H0K1	Serine/threonine-protein kinase SIK2 OS=Homo sapiens GN=SIK2 PE=1 SV=1	0.00376294	2.79263	1.2959	1	1	1	1	926	103.849	6.02		1		1
FALSE	High	Master Protein	O43156	TELO2-interacting protein 1 homolog OS=Homo sapiens GN=TTI1 PE=1 SV=3	0.00202122	3.11566	1.28558	1	1	1	1	1089	121.992	5.97		1		1
FALSE	High	Master Protein	Q7Z5L2	Coiled-coil domain-containing protein R3HCC1L OS=Homo sapiens GN=R3HCC1L PE=1 SV=2	0.00376294	2.74208	1.26263	1	1	1	1	792	87.829	5.12		1		1
FALSE	Medium	Master Protein	Q8IXB1	DnaJ homolog subfamily C member 10 OS=Homo sapiens GN=DNAJC10 PE=1 SV=2	0.0246249	1.63023	1.26103	1	1	1	1	793	91.021	7.18		1		1
FALSE	Medium	Master Protein	Q969S3	Zinc finger protein 622 OS=Homo sapiens GN=ZNF622 PE=1 SV=1	0.0351722	1.44587	1.25786	1	1	1	1	477	54.237	6.15		1		1
FALSE	Medium	Master Protein	O14744	Protein arginine N-methyltransferase 5 OS=Homo sapiens GN=PRMT5 PE=1 SV=4	0.0106645	1.94731	1.25589	1	1	1	1	637	72.638	6.29		1		1
FALSE	High	Master Protein	Q9Y2X0	Mediator of RNA polymerase II transcription subunit 16 OS=Homo sapiens GN=MED16 PE=1 SV=2	0.00456413	2.5743	1.25428	1	1	1	1	877	96.731	7.37		1		1
FALSE	High	Master Protein	Q13136	Liprin-alpha-1 OS=Homo sapiens GN=PPFIA1 PE=1 SV=1	0.00250878	3.02292	1.24792	1	1	1	1	1202	135.695	6.29		1		1
FALSE	High	Master Protein	Q9BZF1	Oxysterol-binding protein-related protein 8 OS=Homo sapiens GN=OSBPL8 PE=1 SV=3	0.00299401	2.98464	1.23735	1	1	1	1	889	101.132	6.96		1		1
FALSE	Medium	Master Protein	P10515	Dihydrolipoyllysine-residue acetyltransferase component of pyruvate dehydrogenase complex, mitochondrial OS=Homo sapiens GN=DLAT PE=1 SV=3	0.0425379	1.34208	1.23648	1	1	1	1	647	68.953	7.84		1		1
FALSE	Medium	Master Protein	Q8TBA6	Golgin subfamily A member 5 OS=Homo sapiens GN=GOLGA5 PE=1 SV=3	0.0204403	1.69984	1.23119	1	1	1	1	731	82.974	5.83		1		1
FALSE	High	Master Protein	Q9NV70	Exocyst complex component 1 OS=Homo sapiens GN=EXOC1 PE=1 SV=4	0.00456413	2.48241	1.23043	1	1	1	1	894	101.917	6.61		1		1
FALSE	High	Master Protein	Q7Z2T5	TRMT1-like protein OS=Homo sapiens GN=TRMT1L PE=1 SV=2	0.00342801	2.93704	1.22783	1	1	1	1	733	81.695	7.88		1		1
FALSE	Medium	Master Protein	P85037	Forkhead box protein K1 OS=Homo sapiens GN=FOXK1 PE=1 SV=1	0.0246249	1.63097	1.22783	1	1	1	1	733	75.411	9.32		1		1
FALSE	High	Master Protein	Q5R372	Rab GTPase-activating protein 1-like OS=Homo sapiens GN=RABGAP1L PE=1 SV=1	0.00376294	2.78968	1.22699	1	1	1	1	815	92.454	5.31		1		1
FALSE	High	Master Protein	P22670	MHC class II regulatory factor RFX1 OS=Homo sapiens GN=RFX1 PE=1 SV=2	0.00991736	1.9897	1.22574	1	1	1	1	979	104.693	6.29		1		1
FALSE	High	Master Protein	Q8NI77	Kinesin-like protein KIF18A OS=Homo sapiens GN=KIF18A PE=1 SV=2	0.00158144	3.44009	1.22494	1	1	1	1	898	102.216	8.91		1		1
FALSE	High	Master Protein	Q9BVN2	RUN and SH3 domain-containing protein 1 OS=Homo sapiens GN=RUSC1 PE=1 SV=3	0.00586643	2.41319	1.21951	1	1	1	1	902	96.385	6.3		1		1
FALSE	High	Master Protein	P30260	Cell division cycle protein 27 homolog OS=Homo sapiens GN=CDC27 PE=1 SV=2	0.00202122	3.16475	1.21359	1	1	1	1	824	91.809	7.02		1		1
FALSE	Medium	Master Protein	Q8IWK6	Adhesion G protein-coupled receptor A3 OS=Homo sapiens GN=ADGRA3 PE=1 SV=2	0.0476699	1.27246	1.2112	1	1	1	1	1321	146.058	8.48		1		1
FALSE	High	Master Protein	Q9Y2U8	Inner nuclear membrane protein Man1 OS=Homo sapiens GN=LEMD3 PE=1 SV=2	0.00202122	3.25532	1.20746	1	1	1	1	911	99.935	7.55		1		1
FALSE	High	Master Protein	Q9Y2J2	Band 4.1-like protein 3 OS=Homo sapiens GN=EPB41L3 PE=1 SV=2	0.00158144	3.56257	1.19595	1	1	1	1	1087	120.603	5.19		1		1
FALSE	High	Master Protein	Q68CQ4	Digestive organ expansion factor homolog OS=Homo sapiens GN=DIEXF PE=1 SV=2	0.00765632	2.14509	1.19048	1	1	1	1	756	87.001	5.88		1		1
FALSE	High	Master Protein	P18074	TFIIH basal transcription factor complex helicase XPD subunit OS=Homo sapiens GN=ERCC2 PE=1 SV=1	0.00765632	2.19314	1.18421	1	1	1	1	760	86.854	7.15		1		1
FALSE	High	Master Protein	Q16512	Serine/threonine-protein kinase N1 OS=Homo sapiens GN=PKN1 PE=1 SV=2	0.00456413	2.50279	1.16773	1	1	1	1	942	103.868	6.37		1		1
FALSE	High	Master Protein	Q86UV5	Ubiquitin carboxyl-terminal hydrolase 48 OS=Homo sapiens GN=USP48 PE=1 SV=1	0.00158144	3.68215	1.15942	1	1	1	1	1035	118.956	6.05		1		1
FALSE	High	Master Protein	Q99460	26S proteasome non-ATPase regulatory subunit 1 OS=Homo sapiens GN=PSMD1 PE=1 SV=2	0.00456413	2.49949	1.15425	1	1	1	1	953	105.769	5.39		1		1
FALSE	High	Master Protein	Q92625	Ankyrin repeat and SAM domain-containing protein 1A OS=Homo sapiens GN=ANKS1A PE=1 SV=4	0.00456413	2.52651	1.14638	1	1	1	1	1134	123.032	6.38		1		1
FALSE	High	Master Protein	Q7Z3J2	UPF0505 protein C16orf62 OS=Homo sapiens GN=C16orf62 PE=1 SV=2	0.00631199	2.40949	1.14226	1	1	1	1	963	109.492	7.21		1		1
FALSE	High	Master Protein	Q9UPW5	Cytosolic carboxypeptidase 1 OS=Homo sapiens GN=AGTPBP1 PE=1 SV=3	0.00740741	2.31686	1.14192	1	1	1	1	1226	138.361	6.15		1		1
FALSE	High	Master Protein	O75170	Serine/threonine-protein phosphatase 6 regulatory subunit 2 OS=Homo sapiens GN=PPP6R2 PE=1 SV=2	0.00740741	2.31229	1.13872	1	1	1	1	966	104.876	4.87		1		1
FALSE	High	Master Protein	Q5GLZ8	Probable E3 ubiquitin-protein ligase HERC4 OS=Homo sapiens GN=HERC4 PE=1 SV=1	0.00456413	2.48625	1.13529	1	1	1	1	1057	118.487	6.19		1		1
FALSE	Medium	Master Protein	P35251	Replication factor C subunit 1 OS=Homo sapiens GN=RFC1 PE=1 SV=4	0.0110294	1.92154	1.1324	1	1	1	1	1148	128.175	9.36		1		1
FALSE	High	Master Protein	Q9BWU0	Kanadaptin OS=Homo sapiens GN=SLC4A1AP PE=1 SV=1	0.00456413	2.6178	1.13065	1	1	1	1	796	88.759	5.19		1		1
FALSE	Medium	Master Protein	Q5VTR2	E3 ubiquitin-protein ligase BRE1A OS=Homo sapiens GN=RNF20 PE=1 SV=2	0.0291888	1.55596	1.12821	1	1	1	1	975	113.592	5.94		1		1
FALSE	Medium	Master Protein	Q14139	Ubiquitin conjugation factor E4 A OS=Homo sapiens GN=UBE4A PE=1 SV=2	0.0384334	1.39599	1.1257	1	1	1	1	1066	122.482	5.24		1		1
FALSE	High	Master Protein	P25440	Bromodomain-containing protein 2 OS=Homo sapiens GN=BRD2 PE=1 SV=2	0.00795645	2.10519	1.1236	1	1	1	1	801	88.006	9.09		1		1
FALSE	Medium	Master Protein	Q9UHD9	Ubiquilin-2 OS=Homo sapiens GN=UBQLN2 PE=1 SV=2	0.0381232	1.40694	1.12179	1	1	1	1	624	65.655	5.22		1		1
FALSE	High	Master Protein	Q9NRA8	Eukaryotic translation initiation factor 4E transporter OS=Homo sapiens GN=EIF4ENIF1 PE=1 SV=2	0.00765632	2.22388	1.11675	1	1	1	1	985	108.134	8.32		1		1
FALSE	High	Master Protein	P35606	Coatomer subunit beta' OS=Homo sapiens GN=COPB2 PE=1 SV=2	0.00376294	2.82915	1.10375	1	2	1	1	906	102.422	5.27		2		1
FALSE	Medium	Master Protein	Q9Y620	DNA repair and recombination protein RAD54B OS=Homo sapiens GN=RAD54B PE=1 SV=1	0.0373245	1.43699	1.0989	1	1	1	1	910	102.901	8.12		1		1
FALSE	High	Master Protein	Q9NQC3	Reticulon-4 OS=Homo sapiens GN=RTN4 PE=1 SV=2	0.00202122	3.35982	1.0906	1	1	1	1	1192	129.851	4.5		1		1
FALSE	High	Master Protein	Q8IUD2	ELKS/Rab6-interacting/CAST family member 1 OS=Homo sapiens GN=ERC1 PE=1 SV=1	0.00456413	2.54546	1.07527	1	1	1	1	1116	128.008	5.97		1		1
FALSE	High	Master Protein	Q9BZF3	Oxysterol-binding protein-related protein 6 OS=Homo sapiens GN=OSBPL6 PE=1 SV=1	0.00765632	2.26106	1.07066	1	1	1	1	934	106.239	6.93		1		1
FALSE	High	Master Protein	Q8TF05	Serine/threonine-protein phosphatase 4 regulatory subunit 1 OS=Homo sapiens GN=PPP4R1 PE=1 SV=1	0.00342801	2.9108	1.05263	1	1	1	1	950	106.936	4.77		1		1
FALSE	Medium	Master Protein	Q96M89	Coiled-coil domain-containing protein 138 OS=Homo sapiens GN=CCDC138 PE=1 SV=1	0.0376384	1.43215	1.05263	1	1	1	1	665	76.171	8.53		1		1
FALSE	Medium	Master Protein	Q86Y56	Dynein assembly factor 5, axonemal OS=Homo sapiens GN=DNAAF5 PE=1 SV=4	0.0407866	1.36927	1.05263	1	1	1	1	855	93.462	6.42		1		1
FALSE	Medium	Master Protein	Q9Y2X7	ARF GTPase-activating protein GIT1 OS=Homo sapiens GN=GIT1 PE=1 SV=2	0.0412744	1.35932	1.05125	1	1	1	1	761	84.289	6.8		1		1
FALSE	Medium	Master Protein	Q8TF21	Ankyrin repeat domain-containing protein 24 OS=Homo sapiens GN=ANKRD24 PE=2 SV=2	0.0411059	1.36361	1.04712	1	1	1	1	1146	124.111	5.01		1		1
FALSE	Medium	Master Protein	Q03701	CCAAT/enhancer-binding protein zeta OS=Homo sapiens GN=CEBPZ PE=1 SV=3	0.0168404	1.80024	1.04364	1	1	1	1	1054	120.898	5.94		1		1
FALSE	Medium	Master Protein	P29323	Ephrin type-B receptor 2 OS=Homo sapiens GN=EPHB2 PE=1 SV=5	0.0273452	1.57626	1.04265	1	1	1	1	1055	117.417	6.55		1		1
FALSE	Medium	Master Protein	Q96DT7	Zinc finger and BTB domain-containing protein 10 OS=Homo sapiens GN=ZBTB10 PE=1 SV=2	0.0273452	1.57203	1.0333	1	1	1	1	871	94.835	5.16		1		1
FALSE	Medium	Master Protein	Q8IWR0	Zinc finger CCCH domain-containing protein 7A OS=Homo sapiens GN=ZC3H7A PE=1 SV=1	0.0106645	1.93855	1.02987	1	1	1	1	971	110.466	7.3		1		1
FALSE	Medium	Master Protein	Q6PJI9	WD repeat-containing protein 59 OS=Homo sapiens GN=WDR59 PE=1 SV=2	0.0273452	1.58137	1.02669	1	1	1	1	974	109.724	7.91		1		1
FALSE	Medium	Master Protein	Q8WVB6	Chromosome transmission fidelity protein 18 homolog OS=Homo sapiens GN=CHTF18 PE=1 SV=1	0.0338416	1.46433	1.02564	1	1	1	1	975	107.317	7.21		1		1
FALSE	High	Master Protein	Q68EM7	Rho GTPase-activating protein 17 OS=Homo sapiens GN=ARHGAP17 PE=1 SV=1	0.00765632	2.26201	1.02157	1	1	1	1	881	95.377	7.62		1		1
FALSE	Medium	Master Protein	Q96RU2	Ubiquitin carboxyl-terminal hydrolase 28 OS=Homo sapiens GN=USP28 PE=1 SV=1	0.0260736	1.6045	1.02136	1	1	1	1	1077	122.414	5.2		1		1
FALSE	Medium	Master Protein	Q9HC35	Echinoderm microtubule-associated protein-like 4 OS=Homo sapiens GN=EML4 PE=1 SV=3	0.0260736	1.60189	1.01937	1	1	1	1	981	108.848	6.4		1		1
FALSE	Medium	Master Protein	Q13423	NAD(P) transhydrogenase, mitochondrial OS=Homo sapiens GN=NNT PE=1 SV=3	0.0110294	1.90553	1.01289	1	1	1	1	1086	113.823	8.09		1		1
FALSE	Medium	Master Protein	Q9UQR1	Zinc finger protein 148 OS=Homo sapiens GN=ZNF148 PE=1 SV=2	0.0267891	1.58536	1.00756	1	1	1	1	794	88.921	6.48		1		1
FALSE	Medium	Master Protein	Q13435	Splicing factor 3B subunit 2 OS=Homo sapiens GN=SF3B2 PE=1 SV=2	0.025	1.62397	1.00559	1	1	1	1	895	100.165	5.67		1		1
FALSE	High	Master Protein	Q9C0B7	Transport and Golgi organization protein 6 homolog OS=Homo sapiens GN=TANGO6 PE=1 SV=2	0.00376294	2.67695	1.00548	1	1	1	1	1094	120.671	6.11		1		1
FALSE	Medium	Master Protein	O95155	Ubiquitin conjugation factor E4 B OS=Homo sapiens GN=UBE4B PE=1 SV=1	0.0257099	1.60854	0.998464	1	1	1	1	1302	146.092	6.55		1		1
FALSE	High	Master Protein	Q96RT1	Protein LAP2 OS=Homo sapiens GN=ERBB2IP PE=1 SV=2	0.00376294	2.69101	0.991501	1	1	1	1	1412	158.2	5.5		1		1
FALSE	High	Master Protein	Q7Z4L5	Tetratricopeptide repeat protein 21B OS=Homo sapiens GN=TTC21B PE=1 SV=2	0.00765632	2.2241	0.987842	1	1	1	1	1316	150.84	6.96		1		1
FALSE	High	Master Protein	Q6ZS17	Protein FAM65A OS=Homo sapiens GN=FAM65A PE=1 SV=1	0.00202122	3.25626	0.981194	1	1	1	1	1223	132.225	6.28		1		1
FALSE	Medium	Master Protein	Q9NYF8	Bcl-2-associated transcription factor 1 OS=Homo sapiens GN=BCLAF1 PE=1 SV=2	0.0378676	1.41873	0.978261	1	2	1	1	920	106.059	9.98		2		1
FALSE	Medium	Master Protein	Q92997	Segment polarity protein dishevelled homolog DVL-3 OS=Homo sapiens GN=DVL3 PE=1 SV=2	0.0129345	1.8514	0.977654	1	1	1	1	716	78.006	6.65		1		1
FALSE	Medium	Master Protein	Q92556	Engulfment and cell motility protein 1 OS=Homo sapiens GN=ELMO1 PE=1 SV=2	0.03415	1.45063	0.962861	1	1	1	1	727	83.776	6.28		1		1
FALSE	High	Master Protein	Q14147	Probable ATP-dependent RNA helicase DHX34 OS=Homo sapiens GN=DHX34 PE=1 SV=2	0.00342801	2.90588	0.96238	1	1	1	1	1143	128.04	7.56		1		1
FALSE	High	Master Protein	Q66K14	TBC1 domain family member 9B OS=Homo sapiens GN=TBC1D9B PE=1 SV=3	0.00795645	2.11419	0.96	1	1	1	1	1250	140.436	5.25		1		1
FALSE	High	Master Protein	P20936	Ras GTPase-activating protein 1 OS=Homo sapiens GN=RASA1 PE=1 SV=1	0.00740741	2.28559	0.95511	1	1	1	1	1047	116.329	6.54		1		1
FALSE	High	Master Protein	P16885	1-phosphatidylinositol 4,5-bisphosphate phosphodiesterase gamma-2 OS=Homo sapiens GN=PLCG2 PE=1 SV=4	0.00202122	3.17108	0.948617	1	1	1	1	1265	147.776	6.64		1		1
FALSE	Medium	Master Protein	O60313	Dynamin-like 120 kDa protein, mitochondrial OS=Homo sapiens GN=OPA1 PE=1 SV=3	0.0187251	1.76828	0.9375	1	1	1	1	960	111.561	7.87		1		1
FALSE	Medium	Master Protein	Q9C0B9	Zinc finger CCHC domain-containing protein 2 OS=Homo sapiens GN=ZCCHC2 PE=1 SV=6	0.0451613	1.30777	0.933786	1	1	1	1	1178	125.858	7.01		1		1
FALSE	Medium	Master Protein	P11171	Protein 4.1 OS=Homo sapiens GN=EPB41 PE=1 SV=4	0.0253651	1.61475	0.925926	1	1	1	1	864	96.957	5.58		1		1
FALSE	Medium	Master Protein	Q96PE3	Type I inositol 3,4-bisphosphate 4-phosphatase OS=Homo sapiens GN=INPP4A PE=1 SV=1	0.039752	1.37789	0.921187	1	1	1	1	977	109.885	6.96		1		1
FALSE	Medium	Master Protein	O00267	Transcription elongation factor SPT5 OS=Homo sapiens GN=SUPT5H PE=1 SV=1	0.0257099	1.60995	0.919963	1	1	1	1	1087	120.925	5.06		1		1
FALSE	High	Master Protein	Q504Q3	PAB-dependent poly(A)-specific ribonuclease subunit PAN2 OS=Homo sapiens GN=PAN2 PE=1 SV=3	0.00910973	2.018	0.915141	1	1	1	1	1202	135.281	5.99		1		1
FALSE	Medium	Master Protein	Q96DM3	Uncharacterized protein C18orf8 OS=Homo sapiens GN=C18orf8 PE=2 SV=2	0.0267891	1.58603	0.913242	1	1	1	1	657	74.927	7.83		1		1
FALSE	High	Master Protein	Q9UNS1	Protein timeless homolog OS=Homo sapiens GN=TIMELESS PE=1 SV=2	0.00342801	2.88807	0.910596	1	1	1	1	1208	138.572	5.4		1		1
FALSE	Medium	Master Protein	O60315	Zinc finger E-box-binding homeobox 2 OS=Homo sapiens GN=ZEB2 PE=1 SV=1	0.0295455	1.55145	0.906096	1	1	1	1	1214	136.361	6.32		1		1
FALSE	High	Master Protein	Q7Z4S6	Kinesin-like protein KIF21A OS=Homo sapiens GN=KIF21A PE=1 SV=2	0.00250878	3.03203	0.896057	1	1	1	1	1674	187.063	6.42		1		1
FALSE	High	Master Protein	Q9Y2X9	Zinc finger protein 281 OS=Homo sapiens GN=ZNF281 PE=1 SV=1	0.00422734	2.64936	0.893855	1	1	1	1	895	96.855	8.48		1		1
FALSE	Medium	Master Protein	Q8N1G0	Zinc finger protein 687 OS=Homo sapiens GN=ZNF687 PE=1 SV=1	0.0338416	1.46852	0.889248	1	1	1	1	1237	129.446	8.19		1		1
FALSE	High	Master Protein	O75976	Carboxypeptidase D OS=Homo sapiens GN=CPD PE=1 SV=2	0.00795645	2.11605	0.869565	1	2	1	1	1380	152.835	6.05		2		1
FALSE	Medium	Master Protein	Q13395	Probable methyltransferase TARBP1 OS=Homo sapiens GN=TARBP1 PE=1 SV=1	0.0106645	1.94157	0.863664	1	1	1	1	1621	181.559	7.05		1		1
FALSE	Medium	Master Protein	Q9Y613	FH1/FH2 domain-containing protein 1 OS=Homo sapiens GN=FHOD1 PE=1 SV=3	0.0332835	1.48149	0.859107	1	1	1	1	1164	126.473	6.39		1		1
FALSE	Medium	Master Protein	O15164	Transcription intermediary factor 1-alpha OS=Homo sapiens GN=TRIM24 PE=1 SV=3	0.0378676	1.41657	0.857143	1	1	1	1	1050	116.757	7.11		1		1
FALSE	Medium	Master Protein	O60566	Mitotic checkpoint serine/threonine-protein kinase BUB1 beta OS=Homo sapiens GN=BUB1B PE=1 SV=3	0.0351722	1.44539	0.857143	1	1	1	1	1050	119.47	5.27		1		1
FALSE	High	Master Protein	Q9H4A3	Serine/threonine-protein kinase WNK1 OS=Homo sapiens GN=WNK1 PE=1 SV=2	0.000607903	5.03414	0.839631	2	2	2	1	2382	250.64	6.34		2		2
FALSE	Medium	Master Protein	Q7Z3C6	Autophagy-related protein 9A OS=Homo sapiens GN=ATG9A PE=1 SV=3	0.0144695	1.82189	0.834327	1	1	1	1	839	94.387	6.67		1		1
FALSE	High	Master Protein	Q96RG2	PAS domain-containing serine/threonine-protein kinase OS=Homo sapiens GN=PASK PE=1 SV=3	0.00765632	2.24109	0.831444	1	1	1	1	1323	142.839	4.86		1		1
FALSE	High	Master Protein	Q7Z6Z7	E3 ubiquitin-protein ligase HUWE1 OS=Homo sapiens GN=HUWE1 PE=1 SV=3	0	6.99283	0.823045	3	3	3	1	4374	481.589	5.22		3		3
FALSE	Medium	Master Protein	Q9Y4E6	WD repeat-containing protein 7 OS=Homo sapiens GN=WDR7 PE=1 SV=2	0.0332835	1.4916	0.805369	1	1	1	1	1490	163.705	6.92		1		1
FALSE	High	Master Protein	P29144	Tripeptidyl-peptidase 2 OS=Homo sapiens GN=TPP2 PE=1 SV=4	0.00158144	3.60678	0.800641	1	1	1	1	1249	138.263	6.32		1		1
FALSE	High	Master Protein	Q9Y2I1	Nischarin OS=Homo sapiens GN=NISCH PE=1 SV=3	0.00456413	2.5085	0.797872	1	1	1	1	1504	166.524	5.14		1		1
FALSE	High	Master Protein	Q9UM54	Unconventional myosin-VI OS=Homo sapiens GN=MYO6 PE=1 SV=4	0.00765632	2.22265	0.772798	1	1	1	1	1294	149.596	8.53		1		1
FALSE	Medium	Master Protein	Q9HBD1	Roquin-2 OS=Homo sapiens GN=RC3H2 PE=1 SV=2	0.0378676	1.41794	0.755668	1	1	1	1	1191	131.586	6.89		1		1
FALSE	High	Master Protein	Q6JQN1	Acyl-CoA dehydrogenase family member 10 OS=Homo sapiens GN=ACAD10 PE=1 SV=1	0.00740741	2.30566	0.75543	1	1	1	1	1059	118.758	8.06		1		1
FALSE	High	Master Protein	Q12955	Ankyrin-3 OS=Homo sapiens GN=ANK3 PE=1 SV=3	0	7.56606	0.753941	3	3	3	1	4377	480.113	6.49		3		3
FALSE	High	Master Protein	Q9Y6R4	Mitogen-activated protein kinase kinase kinase 4 OS=Homo sapiens GN=MAP3K4 PE=1 SV=2	0.00456413	2.58153	0.746269	1	1	1	1	1608	181.57	6.32		1		1
FALSE	Medium	Master Protein	Q9UBN7	Histone deacetylase 6 OS=Homo sapiens GN=HDAC6 PE=1 SV=2	0.03415	1.45063	0.740741	1	1	1	1	1215	131.336	5.3		1		1
FALSE	High	Master Protein	O43683	Mitotic checkpoint serine/threonine-protein kinase BUB1 OS=Homo sapiens GN=BUB1 PE=1 SV=1	0.00740741	2.31804	0.737327	1	1	1	1	1085	122.297	6.47		1		1
FALSE	High	Master Protein	O95239	Chromosome-associated kinesin KIF4A OS=Homo sapiens GN=KIF4A PE=1 SV=3	0.00202122	3.08313	0.730519	1	1	1	1	1232	139.794	6.27		1		1
FALSE	High	Master Protein	Q01970	1-phosphatidylinositol 4,5-bisphosphate phosphodiesterase beta-3 OS=Homo sapiens GN=PLCB3 PE=1 SV=2	0.00376294	2.73993	0.729335	1	1	1	1	1234	138.713	5.9		1		1
FALSE	High	Master Protein	Q9P1Y5	Calmodulin-regulated spectrin-associated protein 3 OS=Homo sapiens GN=CAMSAP3 PE=1 SV=2	0.00376294	2.71444	0.720576	1	1	1	1	1249	134.666	8.35		1		1
FALSE	Medium	Master Protein	P78332	RNA-binding protein 6 OS=Homo sapiens GN=RBM6 PE=1 SV=5	0.0200708	1.71602	0.712378	1	1	1	1	1123	128.565	6.32		1		1
FALSE	Medium	Master Protein	Q9Y4K4	Mitogen-activated protein kinase kinase kinase kinase 5 OS=Homo sapiens GN=MAP4K5 PE=1 SV=1	0.0381232	1.40209	0.70922	1	1	1	1	846	94.979	7.64		1		1
FALSE	High	Master Protein	Q14966	Zinc finger protein 638 OS=Homo sapiens GN=ZNF638 PE=1 SV=2	0.00376294	2.79806	0.707786	1	1	1	1	1978	220.488	6.38		1		1
FALSE	Medium	Master Protein	Q96ST3	Paired amphipathic helix protein Sin3a OS=Homo sapiens GN=SIN3A PE=1 SV=2	0.0228063	1.65679	0.706991	1	1	1	1	1273	145.085	7.25		1		1
FALSE	Medium	Master Protein	Q9BXW9	Fanconi anemia group D2 protein OS=Homo sapiens GN=FANCD2 PE=1 SV=2	0.0338416	1.45655	0.68918	1	1	1	1	1451	164.025	5.88		1		1
FALSE	Medium	Master Protein	Q96EV2	RNA-binding protein 33 OS=Homo sapiens GN=RBM33 PE=1 SV=3	0.0456817	1.29636	0.683761	1	1	1	1	1170	129.906	6.93		1		1
FALSE	High	Master Protein	P26358	DNA (cytosine-5)-methyltransferase 1 OS=Homo sapiens GN=DNMT1 PE=1 SV=2	0.00158144	4.33734	0.680693	1	1	1	1	1616	183.05	7.75		1		1
FALSE	High	Master Protein	E9PAV3	Nascent polypeptide-associated complex subunit alpha, muscle-specific form OS=Homo sapiens GN=NACA PE=1 SV=1	0.000607903	4.82565	0.673725	1	1	1	1	2078	205.295	9.58		1		1
FALSE	Medium	Master Protein	Q7Z5K2	Wings apart-like protein homolog OS=Homo sapiens GN=WAPAL PE=1 SV=1	0.0125506	1.8687	0.672269	1	1	1	1	1190	132.863	5.44		1		1
FALSE	Medium	Master Protein	Q5TAX3	Terminal uridylyltransferase 4 OS=Homo sapiens GN=ZCCHC11 PE=1 SV=3	0.0476699	1.27368	0.6691	1	1	1	1	1644	185.048	7.97		1		1
FALSE	High	Master Protein	P31327	Carbamoyl-phosphate synthase [ammonia], mitochondrial OS=Homo sapiens GN=CPS1 PE=1 SV=2	0.00342801	2.89279	0.666667	1	1	1	1	1500	164.835	6.74		1		1
FALSE	Medium	Master Protein	Q5VZ89	DENN domain-containing protein 4C OS=Homo sapiens GN=DENND4C PE=1 SV=2	0.0204403	1.69767	0.657501	1	1	1	1	1673	186.739	6.86		1		1
FALSE	Medium	Master Protein	Q12968	Nuclear factor of activated T-cells, cytoplasmic 3 OS=Homo sapiens GN=NFATC3 PE=1 SV=1	0.0200708	1.70312	0.651163	1	1	1	1	1075	115.522	6.37		1		1
FALSE	Medium	Master Protein	O14802	DNA-directed RNA polymerase III subunit RPC1 OS=Homo sapiens GN=POLR3A PE=1 SV=2	0.0373245	1.43735	0.647482	1	1	1	1	1390	155.542	8.48		1		1
FALSE	High	Master Protein	Q9NYU2	UDP-glucose:glycoprotein glucosyltransferase 1 OS=Homo sapiens GN=UGGT1 PE=1 SV=3	0.00456413	2.50822	0.643087	1	1	1	1	1555	177.078	5.63		1		1
FALSE	High	Master Protein	A1L4H1	Soluble scavenger receptor cysteine-rich domain-containing protein SSC5D OS=Homo sapiens GN=SSC5D PE=1 SV=3	0.00876461	2.0575	0.635728	1	4	1	1	1573	165.639	6.13		4		1
FALSE	High	Master Protein	Q9UPY3	Endoribonuclease Dicer OS=Homo sapiens GN=DICER1 PE=1 SV=3	0.00910973	2.02655	0.62435	1	1	1	1	1922	218.542	5.68		1		1
FALSE	High	Master Protein	Q9Y520	Protein PRRC2C OS=Homo sapiens GN=PRRC2C PE=1 SV=4	0.00740741	2.36261	0.621547	1	1	1	1	2896	316.718	9.13		1		1
FALSE	High	Master Protein	Q13625	Apoptosis-stimulating of p53 protein 2 OS=Homo sapiens GN=TP53BP2 PE=1 SV=2	0.00910973	2.0242	0.620567	1	1	1	1	1128	125.538	6.07		1		1
FALSE	Medium	Master Protein	Q5XPI4	E3 ubiquitin-protein ligase RNF123 OS=Homo sapiens GN=RNF123 PE=1 SV=1	0.0219608	1.6855	0.608828	1	1	1	1	1314	148.42	6.74		1		1
FALSE	Medium	Master Protein	P42695	Condensin-2 complex subunit D3 OS=Homo sapiens GN=NCAPD3 PE=1 SV=2	0.0190779	1.75203	0.600801	1	1	1	1	1498	168.783	7.5		1		1
FALSE	High	Master Protein	Q6R327	Rapamycin-insensitive companion of mTOR OS=Homo sapiens GN=RICTOR PE=1 SV=1	0.00910973	2.0139	0.58548	1	1	1	1	1708	192.097	7.47		1		1
FALSE	Medium	Master Protein	Q8WWZ4	ATP-binding cassette sub-family A member 10 OS=Homo sapiens GN=ABCA10 PE=2 SV=3	0.0200708	1.70664	0.583279	1	1	1	1	1543	175.676	6.65		1		1
FALSE	Medium	Master Protein	O14827	Ras-specific guanine nucleotide-releasing factor 2 OS=Homo sapiens GN=RASGRF2 PE=1 SV=2	0.03415	1.45014	0.565885	1	2	1	1	1237	140.675	7.53		2		1
FALSE	High	Master Protein	Q6PFW1	Inositol hexakisphosphate and diphosphoinositol-pentakisphosphate kinase 1 OS=Homo sapiens GN=PPIP5K1 PE=1 SV=1	0.00765632	2.19172	0.558269	1	1	1	1	1433	159.42	5.4		1		1
FALSE	Medium	Master Protein	Q04721	Neurogenic locus notch homolog protein 2 OS=Homo sapiens GN=NOTCH2 PE=1 SV=3	0.0425379	1.34275	0.526103	1	1	1	1	2471	265.226	5.14		1		1
FALSE	Medium	Master Protein	O95359	Transforming acidic coiled-coil-containing protein 2 OS=Homo sapiens GN=TACC2 PE=1 SV=3	0.0381232	1.40329	0.50882	1	1	1	1	2948	309.237	4.79		1		1
FALSE	High	Master Protein	Q92538	Golgi-specific brefeldin A-resistance guanine nucleotide exchange factor 1 OS=Homo sapiens GN=GBF1 PE=1 SV=2	0.00740741	2.30989	0.484131	1	1	1	1	1859	206.315	5.73		1		1
FALSE	Medium	Master Protein	Q2M2H8	Probable maltase-glucoamylase 2 OS=Homo sapiens GN=MGAM2 PE=2 SV=3	0.0168404	1.80244	0.477137	1	4	1	1	2515	277.816	5.21		4		1
FALSE	Medium	Master Protein	P11274	Breakpoint cluster region protein OS=Homo sapiens GN=BCR PE=1 SV=2	0.0273452	1.57025	0.472069	1	1	1	1	1271	142.73	7.03		1		1
FALSE	High	Master Protein	P46939	Utrophin OS=Homo sapiens GN=UTRN PE=1 SV=2	0.00499093	2.45186	0.466065	1	1	1	1	3433	394.22	5.33		1		1
FALSE	High	Master Protein	P50748	Kinetochore-associated protein 1 OS=Homo sapiens GN=KNTC1 PE=1 SV=1	0.00910973	2.02365	0.452694	1	1	1	1	2209	250.588	5.97		1		1
FALSE	High	Master Protein	Q6P2Q9	Pre-mRNA-processing-splicing factor 8 OS=Homo sapiens GN=PRPF8 PE=1 SV=2	0.00158144	3.56162	0.428266	1	1	1	1	2335	273.427	8.84		1		1
FALSE	High	Master Protein	Q01082	Spectrin beta chain, non-erythrocytic 1 OS=Homo sapiens GN=SPTBN1 PE=1 SV=2	0.00456413	2.4756	0.380711	1	1	1	1	2364	274.439	5.57		1		1
FALSE	Medium	Master Protein	Q12789	General transcription factor 3C polypeptide 1 OS=Homo sapiens GN=GTF3C1 PE=1 SV=4	0.0273452	1.57659	0.379327	1	1	1	1	2109	238.725	7.3		1		1
FALSE	Medium	Master Protein	Q96M86	Dynein heavy chain domain-containing protein 1 OS=Homo sapiens GN=DNHD1 PE=2 SV=2	0.0434314	1.32221	0.252472	1	1	1	1	4753	533.305	6.71		1		1
FALSE	High	Master Protein	P04264	Keratin, type II cytoskeletal 1 OS=Homo sapiens GN=KRT1 PE=1 SV=6	0	472.705	71.4286	61	1519	52	1	644	65.999	8.12	710	809	59	58
FALSE	High	Master Protein	P13645	Keratin, type I cytoskeletal 10 OS=Homo sapiens GN=KRT10 PE=1 SV=6	0	310.986	54.7945	45	1060	36	1	584	58.792	5.21	529	531	42	42
FALSE	High	Master Protein	P35908	Keratin, type II cytoskeletal 2 epidermal OS=Homo sapiens GN=KRT2 PE=1 SV=2	0	407.198	83.4116	66	1003	51	1	639	65.393	8	481	522	56	64
FALSE	High	Master Protein	P35527	Keratin, type I cytoskeletal 9 OS=Homo sapiens GN=KRT9 PE=1 SV=3	0	317.388	69.8234	42	835	41	1	623	62.027	5.24	392	443	36	41
FALSE	High	Master Protein	P13647	Keratin, type II cytoskeletal 5 OS=Homo sapiens GN=KRT5 PE=1 SV=3	0	258.954	56.9492	49	651	26	1	590	62.34	7.74	348	303	46	48
FALSE	High	Master Protein	P02533	Keratin, type I cytoskeletal 14 OS=Homo sapiens GN=KRT14 PE=1 SV=4	0	240.502	70.7627	46	587	15	1	472	51.529	5.16	318	269	42	38
FALSE	High	Master Protein	P04259	Keratin, type II cytoskeletal 6B OS=Homo sapiens GN=KRT6B PE=1 SV=5	0	227.824	63.6525	48	533	4	1	564	60.03	8	310	223	46	37
FALSE	High	Master Protein	P08779	Keratin, type I cytoskeletal 16 OS=Homo sapiens GN=KRT16 PE=1 SV=4	0	216.498	69.1332	42	540	21	1	473	51.236	5.05	308	232	41	35
FALSE	High	Master Protein	P02538	Keratin, type II cytoskeletal 6A OS=Homo sapiens GN=KRT6A PE=1 SV=3	0	241.509	63.8298	51	512	5	1	564	60.008	8	298	214	48	41
FALSE	High	Master Protein	P15924	Desmoplakin OS=Homo sapiens GN=DSP PE=1 SV=3	0	259.56	29.0143	87	351	87	1	2871	331.569	6.81	157	194	60	79
FALSE	High	Master Protein	Q04695	Keratin, type I cytoskeletal 17 OS=Homo sapiens GN=KRT17 PE=1 SV=2	0	106.071	47.4537	29	276	8	1	432	48.076	5.02	156	120	28	19
FALSE	High	Master Protein	P07437	Tubulin beta chain OS=Homo sapiens GN=TUBB PE=1 SV=2	0	231.129	70.2703	30	334	6	1	444	49.639	4.89	147	187	29	25
FALSE	High	Master Protein	P68371	Tubulin beta-4B chain OS=Homo sapiens GN=TUBB4B PE=1 SV=1	0	239.048	70.1124	30	331	2	1	445	49.799	4.89	143	188	29	26
FALSE	High	Master Protein	P04350	Tubulin beta-4A chain OS=Homo sapiens GN=TUBB4A PE=1 SV=2	0	172.776	65.0901	24	288	5	1	444	49.554	4.88	129	159	23	21
FALSE	High	Master Protein	Q9BVA1	Tubulin beta-2B chain OS=Homo sapiens GN=TUBB2B PE=1 SV=1	0	203.345	56.8539	26	298	2	1	445	49.921	4.89	128	170	26	23
FALSE	High	Master Protein	Q13885	Tubulin beta-2A chain OS=Homo sapiens GN=TUBB2A PE=1 SV=1	0	194.813	56.8539	26	293	2	1	445	49.875	4.89	127	166	26	22
FALSE	High	Master Protein	O95678	Keratin, type II cytoskeletal 75 OS=Homo sapiens GN=KRT75 PE=1 SV=2	0	124.066	42.1053	33	223	11	1	551	59.524	7.74	127	96	31	22
FALSE	High	Master Protein	Q7Z794	Keratin, type II cytoskeletal 1b OS=Homo sapiens GN=KRT77 PE=2 SV=3	0	76.5725	34.2561	21	222	16	1	578	61.864	5.99	103	119	14	20
FALSE	High	Master Protein	Q9NSB2	Keratin, type II cuticular Hb4 OS=Homo sapiens GN=KRT84 PE=2 SV=2	0	107.266	50.5	30	135	26	1	600	64.801	7.56	97	38	30	4
FALSE	High	Master Protein	P13646	Keratin, type I cytoskeletal 13 OS=Homo sapiens GN=KRT13 PE=1 SV=4	0	49.4128	31.6594	16	171	7	1	458	49.557	4.96	96	75	15	8
FALSE	High	Master Protein	P05787	Keratin, type II cytoskeletal 8 OS=Homo sapiens GN=KRT8 PE=1 SV=7	0	73.9274	19.6687	15	173	4	1	483	53.671	5.59	96	77	14	12
FALSE	High	Master Protein	Q71U36	Tubulin alpha-1A chain OS=Homo sapiens GN=TUBA1A PE=1 SV=1	0	210.075	63.1929	31	262	1	1	451	50.104	5.06	94	168	22	30
FALSE	High	Master Protein	Q9BQE3	Tubulin alpha-1C chain OS=Homo sapiens GN=TUBA1C PE=1 SV=1	0	205.313	56.5702	30	257	1	1	449	49.863	5.1	94	163	23	29
FALSE	High	Master Protein	P08727	Keratin, type I cytoskeletal 19 OS=Homo sapiens GN=KRT19 PE=1 SV=4	0	37.8672	19.5	12	173	1	1	400	44.079	5.14	93	80	11	8
FALSE	High	Master Protein	P49327	Fatty acid synthase OS=Homo sapiens GN=FASN PE=1 SV=3	0	312.546	35.8025	72	227	72	1	2511	273.254	6.44	87	140	53	68
FALSE	High	Master Protein	Q02413	Desmoglein-1 OS=Homo sapiens GN=DSG1 PE=1 SV=2	0	116.422	24.4042	22	195	21	1	1049	113.676	5.03	87	108	19	22
FALSE	High	Master Protein	Q86Y46	Keratin, type II cytoskeletal 73 OS=Homo sapiens GN=KRT73 PE=1 SV=1	0	23.7264	7.40741	6	166	1	1	540	58.887	7.23	87	79	6	6
FALSE	High	Master Protein	Q13509	Tubulin beta-3 chain OS=Homo sapiens GN=TUBB3 PE=1 SV=2	0	141.266	37.1111	18	169	2	1	450	50.4	4.93	80	89	15	17
FALSE	High	Master Protein	P14923	Junction plakoglobin OS=Homo sapiens GN=JUP PE=1 SV=3	0	104.281	38.7919	23	175	20	1	745	81.693	6.14	77	98	20	23
FALSE	High	Master Protein	Q8N1N4	Keratin, type II cytoskeletal 78 OS=Homo sapiens GN=KRT78 PE=2 SV=2	0	73.8419	35.9615	19	140	16	1	520	56.83	6.02	72	68	17	19
FALSE	High	Master Protein	P02768	Serum albumin OS=Homo sapiens GN=ALB PE=1 SV=2	0	46.0452	19.8686	14	147	14	1	609	69.321	6.28	70	77	10	13
FALSE	High	Master Protein	P68366	Tubulin alpha-4A chain OS=Homo sapiens GN=TUBA4A PE=1 SV=1	0	151.736	48.2143	22	193	3	1	448	49.892	5.06	65	128	16	21
FALSE	High	Master Protein	P25705	ATP synthase subunit alpha, mitochondrial OS=Homo sapiens GN=ATP5A1 PE=1 SV=1	0	142.605	45.5696	33	144	33	1	553	59.714	9.13	64	80	22	31
FALSE	High	Master Protein	P11498	Pyruvate carboxylase, mitochondrial OS=Homo sapiens GN=PC PE=1 SV=2	0	154.266	38.6248	40	118	40	1	1178	129.551	6.84	60	58	35	36
FALSE	High	Master Protein	P06733	Alpha-enolase OS=Homo sapiens GN=ENO1 PE=1 SV=2	0	200.556	68.2028	38	147	38	1	434	47.139	7.39	56	91	23	36
FALSE	High	Master Protein	P68104	Elongation factor 1-alpha 1 OS=Homo sapiens GN=EEF1A1 PE=1 SV=1	0	133.549	42.6407	21	139	21	1	462	50.109	9.01	55	84	11	21
FALSE	High	Master Protein	P60709	Actin, cytoplasmic 1 OS=Homo sapiens GN=ACTB PE=1 SV=1	0	135.444	53.0667	24	160	24	1	375	41.71	5.48	53	107	17	23
FALSE	High	Master Protein	Q15323	Keratin, type I cuticular Ha1 OS=Homo sapiens GN=KRT31 PE=1 SV=3	0	48.823	41.1058	19	83	6	1	416	47.207	4.88	53	30	19	4
FALSE	High	Master Protein	Q9BUF5	Tubulin beta-6 chain OS=Homo sapiens GN=TUBB6 PE=1 SV=1	0	85.3303	31.8386	14	116	5	1	446	49.825	4.88	53	63	12	13
FALSE	High	Master Protein	P35658	Nuclear pore complex protein Nup214 OS=Homo sapiens GN=NUP214 PE=1 SV=2	0	142.513	23.7321	41	103	41	1	2090	213.488	7.47	53	50	34	33
FALSE	High	Master Protein	P60842	Eukaryotic initiation factor 4A-I OS=Homo sapiens GN=EIF4A1 PE=1 SV=1	0	154.437	56.8966	27	123	16	1	406	46.125	5.48	52	71	18	27
FALSE	High	Master Protein	P78527	DNA-dependent protein kinase catalytic subunit OS=Homo sapiens GN=PRKDC PE=1 SV=3	0	215.631	18.1202	65	125	65	1	4128	468.788	7.12	52	73	44	57
FALSE	High	Master Protein	P0DMV9	Heat shock 70 kDa protein 1B OS=Homo sapiens GN=HSPA1B PE=1 SV=1	0	203.485	50.078	36	247	33	1	641	70.009	5.66	48	199	18	36
FALSE	High	Master Protein	P11586	C-1-tetrahydrofolate synthase, cytoplasmic OS=Homo sapiens GN=MTHFD1 PE=1 SV=3	0	153.943	38.3957	38	129	37	1	935	101.495	7.3	48	81	24	35
FALSE	High	Master Protein	Q14525	Keratin, type I cuticular Ha3-II OS=Homo sapiens GN=KRT33B PE=1 SV=3	0	34.7495	30.9406	14	77	2	1	404	46.185	4.84	47	30	14	4
FALSE	High	Master Protein	O00268	Transcription initiation factor TFIID subunit 4 OS=Homo sapiens GN=TAF4 PE=1 SV=2	0	130.336	30.5991	29	98	29	1	1085	110.047	9.94	43	55	20	28
FALSE	High	Master Protein	P11142	Heat shock cognate 71 kDa protein OS=Homo sapiens GN=HSPA8 PE=1 SV=1	0	191.304	36.9969	28	186	17	1	646	70.854	5.52	40	146	16	28
FALSE	High	Master Protein	P04406	Glyceraldehyde-3-phosphate dehydrogenase OS=Homo sapiens GN=GAPDH PE=1 SV=3	0	159.745	51.0448	24	116	23	1	335	36.03	8.46	39	77	17	24
FALSE	High	Master Protein	Q08211	ATP-dependent RNA helicase A OS=Homo sapiens GN=DHX9 PE=1 SV=4	0	119.63	30.3937	35	86	35	1	1270	140.869	6.84	38	48	28	31
FALSE	High	Master Protein	Q14532	Keratin, type I cuticular Ha2 OS=Homo sapiens GN=KRT32 PE=2 SV=3	0	19.4679	14.0625	6	63	1	1	448	50.31	4.84	36	27	6	2
FALSE	High	Master Protein	Q08554	Desmocollin-1 OS=Homo sapiens GN=DSC1 PE=1 SV=2	0	52.318	17.8971	13	66	13	1	894	99.924	5.43	32	34	11	11
FALSE	High	Master Protein	O76013	Keratin, type I cuticular Ha6 OS=Homo sapiens GN=KRT36 PE=2 SV=1	0	15.7849	9.63597	6	56	2	1	467	52.214	4.94	32	24	6	1
FALSE	High	Master Protein	P06576	ATP synthase subunit beta, mitochondrial OS=Homo sapiens GN=ATP5B PE=1 SV=3	0	72.3257	36.862	16	67	16	1	529	56.525	5.4	31	36	11	14
FALSE	High	Master Protein	P11021	78 kDa glucose-regulated protein OS=Homo sapiens GN=HSPA5 PE=1 SV=2	0	120.149	40.8257	30	91	28	1	654	72.288	5.16	29	62	14	30
FALSE	High	Master Protein	P31943	Heterogeneous nuclear ribonucleoprotein H OS=Homo sapiens GN=HNRNPH1 PE=1 SV=4	0	79.4983	38.5301	15	67	9	1	449	49.198	6.3	28	39	11	15
FALSE	High	Master Protein	Q14240	Eukaryotic initiation factor 4A-II OS=Homo sapiens GN=EIF4A2 PE=1 SV=2	0	74.2561	33.4152	14	69	3	1	407	46.373	5.48	28	41	10	14
FALSE	High	Master Protein	P35580	Myosin-10 OS=Homo sapiens GN=MYH10 PE=1 SV=3	0	96.0779	19.585	34	57	25	1	1976	228.858	5.54	28	29	27	26
FALSE	High	Master Protein	P81605	Dermcidin OS=Homo sapiens GN=DCD PE=1 SV=2	0	21.5218	33.6364	4	53	4	1	110	11.277	6.54	27	26	4	4
FALSE	High	Master Protein	P54652	Heat shock-related 70 kDa protein 2 OS=Homo sapiens GN=HSPA2 PE=1 SV=1	0	79.4215	17.2144	12	101	1	1	639	69.978	5.74	27	74	10	11
FALSE	High	Master Protein	P05783	Keratin, type I cytoskeletal 18 OS=Homo sapiens GN=KRT18 PE=1 SV=2	0	9.16785	9.06977	4	52	3	1	430	48.029	5.45	27	25	4	2
FALSE	High	Master Protein	Q5T749	Keratinocyte proline-rich protein OS=Homo sapiens GN=KPRP PE=1 SV=1	0	45.5674	27.4611	14	74	14	1	579	64.093	8.27	26	48	8	13
FALSE	High	Master Protein	P35579	Myosin-9 OS=Homo sapiens GN=MYH9 PE=1 SV=4	0	98.7316	18.4184	34	50	23	1	1960	226.392	5.6	26	24	24	23
FALSE	High	Master Protein	Q86YZ3	Hornerin OS=Homo sapiens GN=HRNR PE=1 SV=2	0	61.896	12.6316	11	70	11	1	2850	282.228	10.04	26	44	9	11
FALSE	High	Master Protein	P62701	40S ribosomal protein S4, X isoform OS=Homo sapiens GN=RPS4X PE=1 SV=2	0	105.421	70.7224	25	67	25	1	263	29.579	10.15	25	42	14	23
FALSE	High	Master Protein	O00571	ATP-dependent RNA helicase DDX3X OS=Homo sapiens GN=DDX3X PE=1 SV=3	0	127.374	45.7704	30	109	29	1	662	73.198	7.18	25	84	15	30
FALSE	High	Master Protein	P17844	Probable ATP-dependent RNA helicase DDX5 OS=Homo sapiens GN=DDX5 PE=1 SV=1	0	93.1325	39.4137	26	82	17	1	614	69.105	8.92	25	57	12	26
FALSE	High	Master Protein	P49411	Elongation factor Tu, mitochondrial OS=Homo sapiens GN=TUFM PE=1 SV=2	0	98.8374	42.2566	21	74	21	1	452	49.51	7.61	24	50	15	21
FALSE	High	Master Protein	P23396	40S ribosomal protein S3 OS=Homo sapiens GN=RPS3 PE=1 SV=2	0	103.779	76.5432	23	72	23	1	243	26.671	9.66	23	49	18	23
FALSE	High	Master Protein	P38919	Eukaryotic initiation factor 4A-III OS=Homo sapiens GN=EIF4A3 PE=1 SV=4	0	58.8429	33.3333	18	48	15	1	411	46.841	6.73	23	25	12	18
FALSE	High	Master Protein	P78386	Keratin, type II cuticular Hb5 OS=Homo sapiens GN=KRT85 PE=1 SV=1	0	31.5551	24.8521	14	24	8	1	507	55.766	6.55	23	1	14	1
FALSE	High	Master Protein	Q92841	Probable ATP-dependent RNA helicase DDX17 OS=Homo sapiens GN=DDX17 PE=1 SV=2	0	91.1263	35.6653	26	82	17	1	729	80.222	8.27	22	60	13	26
FALSE	High	Master Protein	P07355	Annexin A2 OS=Homo sapiens GN=ANXA2 PE=1 SV=2	0	113.026	57.5221	23	75	23	1	339	38.58	7.75	21	54	10	22
FALSE	High	Master Protein	P62979	Ubiquitin-40S ribosomal protein S27a OS=Homo sapiens GN=RPS27A PE=1 SV=2	0	40.8696	38.4615	8	90	8	1	156	17.953	9.64	21	69	4	8
FALSE	High	Master Protein	P52272	Heterogeneous nuclear ribonucleoprotein M OS=Homo sapiens GN=HNRNPM PE=1 SV=3	0	90.9072	37.9452	28	71	28	1	730	77.464	8.7	21	50	16	28
FALSE	High	Master Protein	Q96PK6	RNA-binding protein 14 OS=Homo sapiens GN=RBM14 PE=1 SV=2	0	82.7728	33.1839	22	80	22	1	669	69.449	9.67	21	59	14	21
FALSE	High	Master Protein	P78385	Keratin, type II cuticular Hb3 OS=Homo sapiens GN=KRT83 PE=1 SV=2	0	35.1962	28.3976	15	23	1	1	493	54.161	5.64	21	2	15	2
FALSE	High	Master Protein	O43790	Keratin, type II cuticular Hb6 OS=Homo sapiens GN=KRT86 PE=1 SV=1	0	34.2725	27.7778	15	23	1	1	486	53.466	5.66	21	2	15	2
FALSE	High	Master Protein	P15880	40S ribosomal protein S2 OS=Homo sapiens GN=RPS2 PE=1 SV=2	0	53.9833	49.1468	14	50	14	1	293	31.305	10.24	20	30	7	14
FALSE	High	Master Protein	Q6KB66	Keratin, type II cytoskeletal 80 OS=Homo sapiens GN=KRT80 PE=1 SV=2	0	29.7264	23.6726	10	37	9	1	452	50.494	5.67	20	17	7	8
FALSE	High	Master Protein	Q13085	Acetyl-CoA carboxylase 1 OS=Homo sapiens GN=ACACA PE=1 SV=2	0	92.3901	17.0503	32	48	28	1	2346	265.385	6.37	20	28	20	26
FALSE	High	Master Protein	P63244	Guanine nucleotide-binding protein subunit beta-2-like 1 OS=Homo sapiens GN=GNB2L1 PE=1 SV=3	0	109.938	71.9243	20	56	20	1	317	35.055	7.69	19	37	12	20
FALSE	High	Master Protein	P05141	ADP/ATP translocase 2 OS=Homo sapiens GN=SLC25A5 PE=1 SV=7	0	87.7391	45.302	20	54	9	1	298	32.831	9.69	19	35	16	19
FALSE	High	Master Protein	Q13835	Plakophilin-1 OS=Homo sapiens GN=PKP1 PE=1 SV=2	0	32.8801	19.9465	12	37	12	1	747	82.808	9.13	19	18	10	9
FALSE	High	Master Protein	P17987	T-complex protein 1 subunit alpha OS=Homo sapiens GN=TCP1 PE=1 SV=1	0	141.821	58.9928	32	72	32	1	556	60.306	6.11	18	54	12	32
FALSE	High	Master Protein	P62241	40S ribosomal protein S8 OS=Homo sapiens GN=RPS8 PE=1 SV=2	0	56.7039	53.8462	13	49	13	1	208	24.19	10.32	18	31	8	13
FALSE	High	Master Protein	P14868	Aspartate--tRNA ligase, cytoplasmic OS=Homo sapiens GN=DARS PE=1 SV=2	0	70.2791	45.9082	21	41	21	1	501	57.1	6.55	18	23	14	18
FALSE	High	Master Protein	P02788	Lactotransferrin OS=Homo sapiens GN=LTF PE=1 SV=6	0	87.5255	40	25	60	25	1	710	78.132	8.12	18	42	7	24
FALSE	High	Master Protein	P08238	Heat shock protein HSP 90-beta OS=Homo sapiens GN=HSP90AB1 PE=1 SV=4	0	146.854	37.9834	34	102	21	1	724	83.212	5.03	18	84	9	34
FALSE	High	Master Protein	P09874	Poly [ADP-ribose] polymerase 1 OS=Homo sapiens GN=PARP1 PE=1 SV=4	0	82.5737	31.2623	26	48	26	1	1014	113.012	8.88	18	30	11	24
FALSE	High	Master Protein	Q00839	Heterogeneous nuclear ribonucleoprotein U OS=Homo sapiens GN=HNRNPU PE=1 SV=6	0	83.6558	27.6364	22	61	22	1	825	90.528	6	18	43	11	21
FALSE	High	Master Protein	P55795	Heterogeneous nuclear ribonucleoprotein H2 OS=Homo sapiens GN=HNRNPH2 PE=1 SV=1	0	46.6034	24.2762	10	42	5	1	449	49.232	6.3	18	24	5	10
FALSE	High	Master Protein	O76011	Keratin, type I cuticular Ha4 OS=Homo sapiens GN=KRT34 PE=2 SV=2	0	24.4049	19.9541	9	23	1	1	436	49.392	5.06	18	5	9	2
FALSE	High	Master Protein	P62424	60S ribosomal protein L7a OS=Homo sapiens GN=RPL7A PE=1 SV=2	0	54.9838	46.2406	14	42	14	1	266	29.977	10.61	17	25	9	13
FALSE	High	Master Protein	P40227	T-complex protein 1 subunit zeta OS=Homo sapiens GN=CCT6A PE=1 SV=3	0	86.0097	43.1262	20	53	20	1	531	57.988	6.68	17	36	11	20
FALSE	High	Master Protein	P36578	60S ribosomal protein L4 OS=Homo sapiens GN=RPL4 PE=1 SV=5	0	69.0517	40.9836	16	69	16	1	427	47.667	11.06	17	52	9	16
FALSE	High	Master Protein	P31025	Lipocalin-1 OS=Homo sapiens GN=LCN1 PE=1 SV=1	0	21.5778	35.2273	6	34	6	1	176	19.238	5.58	17	17	5	5
FALSE	High	Master Protein	Q12931	Heat shock protein 75 kDa, mitochondrial OS=Homo sapiens GN=TRAP1 PE=1 SV=3	0	79.7003	30.5398	19	53	18	1	704	80.06	8.21	17	36	12	19
FALSE	High	Master Protein	P23246	Splicing factor, proline- and glutamine-rich OS=Homo sapiens GN=SFPQ PE=1 SV=2	0	106.619	29.5615	28	75	27	1	707	76.102	9.44	17	58	9	28
FALSE	High	Master Protein	P05166	Propionyl-CoA carboxylase beta chain, mitochondrial OS=Homo sapiens GN=PCCB PE=1 SV=3	0	23.6573	23.0056	8	17	8	1	539	58.179	7.64	17		8
FALSE	High	Master Protein	Q14204	Cytoplasmic dynein 1 heavy chain 1 OS=Homo sapiens GN=DYNC1H1 PE=1 SV=5	0	96.4604	8.60956	34	51	34	1	4646	532.072	6.4	17	34	16	32
FALSE	High	Master Protein	Q15366	Poly(rC)-binding protein 2 OS=Homo sapiens GN=PCBP2 PE=1 SV=1	0	46.0744	48.2192	12	47	6	1	365	38.556	6.79	16	31	8	11
FALSE	High	Master Protein	P49790	Nuclear pore complex protein Nup153 OS=Homo sapiens GN=NUP153 PE=1 SV=2	0	42.0996	12.0678	15	32	15	1	1475	153.843	8.73	16	16	12	13
FALSE	High	Master Protein	Q06830	Peroxiredoxin-1 OS=Homo sapiens GN=PRDX1 PE=1 SV=1	0	119.34	76.3819	20	66	17	1	199	22.096	8.13	15	51	7	20
FALSE	High	Master Protein	P04792	Heat shock protein beta-1 OS=Homo sapiens GN=HSPB1 PE=1 SV=2	0	43.5421	60	9	29	9	1	205	22.768	6.4	15	14	5	8
FALSE	High	Master Protein	Q15365	Poly(rC)-binding protein 1 OS=Homo sapiens GN=PCBP1 PE=1 SV=2	0	76.8839	58.427	15	61	10	1	356	37.474	7.09	15	46	8	15
FALSE	High	Master Protein	Q99623	Prohibitin-2 OS=Homo sapiens GN=PHB2 PE=1 SV=2	0	67.068	54.8495	16	40	16	1	299	33.276	9.83	15	25	11	16
FALSE	High	Master Protein	P01040	Cystatin-A OS=Homo sapiens GN=CSTA PE=1 SV=1	0	18.9915	44.898	4	28	4	1	98	11	5.5	15	13	4	4
FALSE	High	Master Protein	P33993	DNA replication licensing factor MCM7 OS=Homo sapiens GN=MCM7 PE=1 SV=4	0	111.189	44.089	29	54	29	1	719	81.257	6.46	15	39	11	29
FALSE	High	Master Protein	P12236	ADP/ATP translocase 3 OS=Homo sapiens GN=SLC25A6 PE=1 SV=4	0	78.1293	43.9597	19	48	8	1	298	32.845	9.74	15	33	12	18
FALSE	High	Master Protein	P22102	Trifunctional purine biosynthetic protein adenosine-3 OS=Homo sapiens GN=GART PE=1 SV=1	0	101.407	33.0693	28	64	28	1	1010	107.699	6.7	15	49	10	28
FALSE	High	Master Protein	P31944	Caspase-14 OS=Homo sapiens GN=CASP14 PE=1 SV=2	0	15.1718	21.4876	6	28	6	1	242	27.662	5.58	15	13	4	6
FALSE	High	Master Protein	Q8NDV7	Trinucleotide repeat-containing gene 6A protein OS=Homo sapiens GN=TNRC6A PE=1 SV=2	0	40.3328	8.7156	12	29	12	1	1962	210.169	7.01	15	14	12	9
FALSE	High	Master Protein	P49368	T-complex protein 1 subunit gamma OS=Homo sapiens GN=CCT3 PE=1 SV=4	0	124.562	53.211	29	61	29	1	545	60.495	6.49	14	47	8	29
FALSE	High	Master Protein	P26373	60S ribosomal protein L13 OS=Homo sapiens GN=RPL13 PE=1 SV=4	0	30.7895	40.2844	9	33	9	1	211	24.247	11.65	14	19	7	8
FALSE	High	Master Protein	Q02543	60S ribosomal protein L18a OS=Homo sapiens GN=RPL18A PE=1 SV=2	0	21.7932	32.3864	7	29	7	1	176	20.749	10.71	14	15	7	7
FALSE	High	Master Protein	P38646	Stress-70 protein, mitochondrial OS=Homo sapiens GN=HSPA9 PE=1 SV=2	0	60.0599	29.0133	18	41	18	1	679	73.635	6.16	14	27	10	18
FALSE	High	Master Protein	P05089	Arginase-1 OS=Homo sapiens GN=ARG1 PE=1 SV=2	0	26.7282	26.087	8	34	8	1	322	34.713	7.21	14	20	6	7
FALSE	High	Master Protein	O43143	Pre-mRNA-splicing factor ATP-dependent RNA helicase DHX15 OS=Homo sapiens GN=DHX15 PE=1 SV=2	0	89.6946	30.566	24	58	23	1	795	90.875	7.46	13	45	10	23
FALSE	High	Master Protein	P54886	Delta-1-pyrroline-5-carboxylate synthase OS=Homo sapiens GN=ALDH18A1 PE=1 SV=2	0	81.4892	26.2893	24	50	24	1	795	87.248	7.12	13	37	11	24
FALSE	High	Master Protein	Q96P63	Serpin B12 OS=Homo sapiens GN=SERPINB12 PE=1 SV=1	0	21.7279	18.7654	6	27	6	1	405	46.247	5.53	13	14	4	6
FALSE	High	Master Protein	P50914	60S ribosomal protein L14 OS=Homo sapiens GN=RPL14 PE=1 SV=4	0	15.3893	16.2791	3	28	3	1	215	23.417	10.93	13	15	3	3
FALSE	High	Master Protein	P22735	Protein-glutamine gamma-glutamyltransferase K OS=Homo sapiens GN=TGM1 PE=1 SV=4	0	18.4616	8.81273	6	21	6	1	817	89.73	6.04	13	8	5	4
FALSE	High	Master Protein	Q92621	Nuclear pore complex protein Nup205 OS=Homo sapiens GN=NUP205 PE=1 SV=3	0	39.199	8.2008	15	27	15	1	2012	227.776	6.19	13	14	12	13
FALSE	High	Master Protein	P61626	Lysozyme C OS=Homo sapiens GN=LYZ PE=1 SV=1	0	46.2938	62.8378	9	36	9	1	148	16.526	9.16	12	24	5	9
FALSE	High	Master Protein	P14618	Pyruvate kinase PKM OS=Homo sapiens GN=PKM PE=1 SV=4	0	120.796	51.4124	25	61	25	1	531	57.9	7.84	12	49	8	25
FALSE	High	Master Protein	P62826	GTP-binding nuclear protein Ran OS=Homo sapiens GN=RAN PE=1 SV=3	0	54.6155	48.6111	14	34	14	1	216	24.408	7.49	12	22	9	14
FALSE	High	Master Protein	P26641	Elongation factor 1-gamma OS=Homo sapiens GN=EEF1G PE=1 SV=3	0	74.7315	36.1556	18	39	18	1	437	50.087	6.67	12	27	7	17
FALSE	High	Master Protein	P07900	Heat shock protein HSP 90-alpha OS=Homo sapiens GN=HSP90AA1 PE=1 SV=5	0	105.964	34.5628	29	80	18	1	732	84.607	5.02	12	68	5	29
FALSE	High	Master Protein	P49736	DNA replication licensing factor MCM2 OS=Homo sapiens GN=MCM2 PE=1 SV=4	0	58.8056	23.6726	18	32	18	1	904	101.832	5.52	12	20	12	15
FALSE	High	Master Protein	P62917	60S ribosomal protein L8 OS=Homo sapiens GN=RPL8 PE=1 SV=2	0	31.2337	22.9572	8	31	8	1	257	28.007	11.03	12	19	6	6
FALSE	High	Master Protein	Q9Y2L1	Exosome complex exonuclease RRP44 OS=Homo sapiens GN=DIS3 PE=1 SV=2	0	66.5281	21.5031	20	38	20	1	958	108.934	7.14	12	26	10	20
FALSE	High	Master Protein	P27708	CAD protein OS=Homo sapiens GN=CAD PE=1 SV=3	0	57.2129	11.6854	21	29	21	1	2225	242.829	6.46	12	17	12	16
FALSE	High	Master Protein	Q13867	Bleomycin hydrolase OS=Homo sapiens GN=BLMH PE=1 SV=1	0	14.9712	9.67033	4	24	4	1	455	52.528	6.27	12	12	3	4
FALSE	High	Master Protein	Q99567	Nuclear pore complex protein Nup88 OS=Homo sapiens GN=NUP88 PE=1 SV=2	0	73.0475	31.5789	19	42	19	1	741	83.489	5.69	11	31	10	19
FALSE	High	Master Protein	P01876	Ig alpha-1 chain C region OS=Homo sapiens GN=IGHA1 PE=1 SV=2	0	20.8948	30.8782	8	23	8	1	353	37.631	6.51	11	12	6	7
FALSE	High	Master Protein	Q07020	60S ribosomal protein L18 OS=Homo sapiens GN=RPL18 PE=1 SV=2	0	17.2001	30.8511	5	22	5	1	188	21.621	11.72	11	11	4	5
FALSE	High	Master Protein	P05023	Sodium/potassium-transporting ATPase subunit alpha-1 OS=Homo sapiens GN=ATP1A1 PE=1 SV=1	0	65.9254	26.002	22	45	22	1	1023	112.824	5.49	11	34	10	22
FALSE	High	Master Protein	P57721	Poly(rC)-binding protein 3 OS=Homo sapiens GN=PCBP3 PE=2 SV=2	0	28.3964	19.1375	7	32	1	1	371	39.44	8.07	11	21	5	7
FALSE	High	Master Protein	Q14203	Dynactin subunit 1 OS=Homo sapiens GN=DCTN1 PE=1 SV=3	0	52.9981	17.9186	18	33	18	1	1278	141.607	5.81	11	22	9	16
FALSE	High	Master Protein	P52597	Heterogeneous nuclear ribonucleoprotein F OS=Homo sapiens GN=HNRNPF PE=1 SV=3	0	24.8619	16.3855	5	29	3	1	415	45.643	5.58	11	18	4	5
FALSE	High	Master Protein	P07814	Bifunctional glutamate/proline--tRNA ligase OS=Homo sapiens GN=EPRS PE=1 SV=5	0	48.1217	15.7407	19	30	19	1	1512	170.483	7.33	11	19	11	16
FALSE	High	Master Protein	O14654	Insulin receptor substrate 4 OS=Homo sapiens GN=IRS4 PE=1 SV=1	0	40.3534	12.7287	14	33	14	1	1257	133.685	8.44	11	22	8	13
FALSE	High	Master Protein	Q08188	Protein-glutamine gamma-glutamyltransferase E OS=Homo sapiens GN=TGM3 PE=1 SV=4	0	18.328	12.2655	6	23	6	1	693	76.584	5.86	11	12	4	5
FALSE	High	Master Protein	P35222	Catenin beta-1 OS=Homo sapiens GN=CTNNB1 PE=1 SV=1	0	20.0001	8.70679	7	26	4	1	781	85.442	5.86	11	15	3	7
FALSE	High	Master Protein	P18124	60S ribosomal protein L7 OS=Homo sapiens GN=RPL7 PE=1 SV=1	0	43.3537	47.1774	14	35	14	1	248	29.207	10.65	10	25	5	14
FALSE	High	Master Protein	P78406	mRNA export factor OS=Homo sapiens GN=RAE1 PE=1 SV=1	0	59.5455	43.75	13	30	13	1	368	40.942	7.83	10	20	8	13
FALSE	High	Master Protein	P83731	60S ribosomal protein L24 OS=Homo sapiens GN=RPL24 PE=1 SV=1	0	30.5278	35.0318	7	28	7	1	157	17.768	11.25	10	18	4	7
FALSE	High	Master Protein	P46781	40S ribosomal protein S9 OS=Homo sapiens GN=RPS9 PE=1 SV=3	0	26.1032	31.4433	9	25	9	1	194	22.578	10.65	10	15	7	9
FALSE	High	Master Protein	O00148	ATP-dependent RNA helicase DDX39A OS=Homo sapiens GN=DDX39A PE=1 SV=2	0	32.7206	20.3747	10	21	1	1	427	49.098	5.68	10	11	6	9
FALSE	High	Master Protein	Q13838	Spliceosome RNA helicase DDX39B OS=Homo sapiens GN=DDX39B PE=1 SV=1	0	31.915	20.3271	10	21	1	1	428	48.96	5.67	10	11	6	9
FALSE	High	Master Protein	P68871	Hemoglobin subunit beta OS=Homo sapiens GN=HBB PE=1 SV=2	0	6.80902	15.6463	2	18	2	1	147	15.988	7.28	10	8	2	2
FALSE	High	Master Protein	Q9P2J5	Leucine--tRNA ligase, cytoplasmic OS=Homo sapiens GN=LARS PE=1 SV=2	0	40.3983	15.051	15	28	15	1	1176	134.379	7.3	10	18	10	15
FALSE	High	Master Protein	P42694	Probable helicase with zinc finger domain OS=Homo sapiens GN=HELZ PE=1 SV=2	0	34.3779	7.20906	13	19	13	1	1942	218.833	7.42	10	9	10	9
FALSE	High	Master Protein	P02765	Alpha-2-HS-glycoprotein OS=Homo sapiens GN=AHSG PE=1 SV=1	0	9.89235	5.44959	3	19	3	1	367	39.3	5.72	10	9	3	3
FALSE	High	Master Protein	P50991	T-complex protein 1 subunit delta OS=Homo sapiens GN=CCT4 PE=1 SV=4	0	111.459	53.2468	26	48	25	1	539	57.888	7.83	9	39	5	26
FALSE	High	Master Protein	P06493	Cyclin-dependent kinase 1 OS=Homo sapiens GN=CDK1 PE=1 SV=3	0	48.121	52.862	13	23	11	1	297	34.074	8.4	9	14	8	12
FALSE	High	Master Protein	P61247	40S ribosomal protein S3a OS=Homo sapiens GN=RPS3A PE=1 SV=2	0	66.1817	52.2727	14	37	14	1	264	29.926	9.73	9	28	8	14
FALSE	High	Master Protein	P00338	L-lactate dehydrogenase A chain OS=Homo sapiens GN=LDHA PE=1 SV=2	0	64.575	45.4819	18	37	17	1	332	36.665	8.27	9	28	8	18
FALSE	High	Master Protein	Q9H9B4	Sideroflexin-1 OS=Homo sapiens GN=SFXN1 PE=1 SV=4	0	58.2941	40.3727	14	32	14	1	322	35.596	9.07	9	23	8	14
FALSE	High	Master Protein	Q15084	Protein disulfide-isomerase A6 OS=Homo sapiens GN=PDIA6 PE=1 SV=1	0	68.774	37.0455	14	27	14	1	440	48.091	5.08	9	18	5	13
FALSE	High	Master Protein	P98170	E3 ubiquitin-protein ligase XIAP OS=Homo sapiens GN=XIAP PE=1 SV=2	0	51.5661	32.998	14	27	14	1	497	56.648	6.65	9	18	6	14
FALSE	High	Master Protein	O95433	Activator of 90 kDa heat shock protein ATPase homolog 1 OS=Homo sapiens GN=AHSA1 PE=1 SV=1	0	33.9736	27.2189	11	20	11	1	338	38.25	5.53	9	11	8	11
FALSE	High	Master Protein	P12273	Prolactin-inducible protein OS=Homo sapiens GN=PIP PE=1 SV=1	0	15.8036	26.7123	5	21	5	1	146	16.562	8.05	9	12	4	4
FALSE	High	Master Protein	O60814	Histone H2B type 1-K OS=Homo sapiens GN=HIST1H2BK PE=1 SV=3	0	8.09717	19.0476	2	17	2	1	126	13.882	10.32	9	8	2	2
FALSE	High	Master Protein	P04040	Catalase OS=Homo sapiens GN=CAT PE=1 SV=3	0	29.0804	18.2163	7	28	7	1	527	59.719	7.39	9	19	3	7
FALSE	High	Master Protein	P41252	Isoleucine--tRNA ligase, cytoplasmic OS=Homo sapiens GN=IARS PE=1 SV=2	0	32.325	10.6181	13	24	13	1	1262	144.406	6.15	9	15	8	13
FALSE	High	Master Protein	P49792	E3 SUMO-protein ligase RanBP2 OS=Homo sapiens GN=RANBP2 PE=1 SV=2	0	53.3643	8.00248	19	28	19	1	3224	357.974	6.2	9	19	9	18
FALSE	High	Master Protein	P20930	Filaggrin OS=Homo sapiens GN=FLG PE=1 SV=3	0	10.6275	2.5117	4	15	4	1	4061	434.922	9.25	9	6	3	3
FALSE	High	Master Protein	Q15233	Non-POU domain-containing octamer-binding protein OS=Homo sapiens GN=NONO PE=1 SV=4	0	155.182	49.8938	33	82	32	1	471	54.197	8.95	8	74	5	33
FALSE	High	Master Protein	P08865	40S ribosomal protein SA OS=Homo sapiens GN=RPSA PE=1 SV=4	0	54.226	41.0169	11	28	11	1	295	32.833	4.87	8	20	4	11
FALSE	High	Master Protein	Q02878	60S ribosomal protein L6 OS=Homo sapiens GN=RPL6 PE=1 SV=3	0	33.7314	40.625	11	25	11	1	288	32.708	10.58	8	17	5	11
FALSE	High	Master Protein	P05109	Protein S100-A8 OS=Homo sapiens GN=S100A8 PE=1 SV=1	0	10.4321	39.7849	4	16	4	1	93	10.828	7.03	8	8	2	3
FALSE	High	Master Protein	P12004	Proliferating cell nuclear antigen OS=Homo sapiens GN=PCNA PE=1 SV=1	0	49.3985	37.1648	10	21	10	1	261	28.75	4.69	8	13	6	9
FALSE	High	Master Protein	O75223	Gamma-glutamylcyclotransferase OS=Homo sapiens GN=GGCT PE=1 SV=1	0	19.0877	31.383	6	19	6	1	188	20.994	5.14	8	11	4	6
FALSE	High	Master Protein	P06737	Glycogen phosphorylase, liver form OS=Homo sapiens GN=PYGL PE=1 SV=4	0	87.5003	30.5785	27	45	23	1	847	97.087	7.17	8	37	7	27
FALSE	High	Master Protein	P62495	Eukaryotic peptide chain release factor subunit 1 OS=Homo sapiens GN=ETF1 PE=1 SV=3	0	40.787	29.5195	13	21	13	1	437	49	5.71	8	13	5	12
FALSE	High	Master Protein	P49848	Transcription initiation factor TFIID subunit 6 OS=Homo sapiens GN=TAF6 PE=1 SV=1	0	49.7804	29.2467	17	34	17	1	677	72.623	8.6	8	26	7	17
FALSE	High	Master Protein	P52292	Importin subunit alpha-1 OS=Homo sapiens GN=KPNA2 PE=1 SV=1	0	44.926	25.7089	10	30	10	1	529	57.826	5.4	8	22	6	10
FALSE	High	Master Protein	P25311	Zinc-alpha-2-glycoprotein OS=Homo sapiens GN=AZGP1 PE=1 SV=2	0	19.0476	22.8188	7	22	7	1	298	34.237	6.05	8	14	4	6
FALSE	High	Master Protein	Q9NR30	Nucleolar RNA helicase 2 OS=Homo sapiens GN=DDX21 PE=1 SV=5	0	35.6108	21.8391	14	35	14	1	783	87.29	9.28	8	27	5	14
FALSE	High	Master Protein	Q6UB35	Monofunctional C1-tetrahydrofolate synthase, mitochondrial OS=Homo sapiens GN=MTHFD1L PE=1 SV=1	0	40.0062	16.6667	15	22	14	1	978	105.724	8.06	8	14	8	12
FALSE	High	Master Protein	P33991	DNA replication licensing factor MCM4 OS=Homo sapiens GN=MCM4 PE=1 SV=5	0	33.2908	16.4542	12	22	12	1	863	96.498	6.74	8	14	7	10
FALSE	High	Master Protein	Q9HAH7	Probable fibrosin-1 OS=Homo sapiens GN=FBRS PE=1 SV=3	0	17.3665	11.9565	4	19	4	1	460	48.358	9.95	8	11	3	4
FALSE	High	Master Protein	P52948	Nuclear pore complex protein Nup98-Nup96 OS=Homo sapiens GN=NUP98 PE=1 SV=4	0	43.6503	8.9158	15	29	15	1	1817	197.457	6.4	8	21	8	15
FALSE	High	Master Protein	O14556	Glyceraldehyde-3-phosphate dehydrogenase, testis-specific OS=Homo sapiens GN=GAPDHS PE=1 SV=2	0	6.76835	4.41176	2	16	1	1	408	44.473	8.19	8	8	2	2
FALSE	High	Master Protein	Q14574	Desmocollin-3 OS=Homo sapiens GN=DSC3 PE=1 SV=3	0	7.44353	2.56696	2	17	2	1	896	99.906	6.1	8	9	2	2
FALSE	High	Master Protein	P30041	Peroxiredoxin-6 OS=Homo sapiens GN=PRDX6 PE=1 SV=3	0	47.7583	57.5893	14	26	14	1	224	25.019	6.38	7	19	7	14
FALSE	High	Master Protein	P35232	Prohibitin OS=Homo sapiens GN=PHB PE=1 SV=1	0	40.7185	50	13	19	13	1	272	29.786	5.76	7	12	7	12
FALSE	High	Master Protein	P00918	Carbonic anhydrase 2 OS=Homo sapiens GN=CA2 PE=1 SV=2	0	50.6463	48.4615	12	27	12	1	260	29.228	7.4	7	20	5	12
FALSE	High	Master Protein	P13639	Elongation factor 2 OS=Homo sapiens GN=EEF2 PE=1 SV=4	0	152.85	41.8415	39	121	38	1	858	95.277	6.83	7	114	6	39
FALSE	High	Master Protein	P24752	Acetyl-CoA acetyltransferase, mitochondrial OS=Homo sapiens GN=ACAT1 PE=1 SV=1	0	44.6644	40.0468	13	23	13	1	427	45.171	8.85	7	16	6	13
FALSE	High	Master Protein	P43490	Nicotinamide phosphoribosyltransferase OS=Homo sapiens GN=NAMPT PE=1 SV=1	0	42.1969	29.3279	13	26	13	1	491	55.487	7.15	7	19	6	13
FALSE	High	Master Protein	Q7KZF4	Staphylococcal nuclease domain-containing protein 1 OS=Homo sapiens GN=SND1 PE=1 SV=1	0	72.4392	25.7143	25	45	25	1	910	101.934	7.17	7	38	7	25
FALSE	High	Master Protein	P12532	Creatine kinase U-type, mitochondrial OS=Homo sapiens GN=CKMT1A PE=1 SV=1	0	53.4451	24.2206	10	22	10	1	417	47.007	8.34	7	15	7	10
FALSE	High	Master Protein	Q00610	Clathrin heavy chain 1 OS=Homo sapiens GN=CLTC PE=1 SV=5	0	90.4497	22.3284	30	49	30	1	1675	191.493	5.69	7	42	5	30
FALSE	High	Master Protein	Q8N1F7	Nuclear pore complex protein Nup93 OS=Homo sapiens GN=NUP93 PE=1 SV=2	0	43.2297	19.2918	15	23	15	1	819	93.43	5.72	7	16	6	14
FALSE	High	Master Protein	P33992	DNA replication licensing factor MCM5 OS=Homo sapiens GN=MCM5 PE=1 SV=5	0	32.8286	18.9373	12	23	12	1	734	82.233	8.37	7	16	5	12
FALSE	High	Master Protein	P11310	Medium-chain specific acyl-CoA dehydrogenase, mitochondrial OS=Homo sapiens GN=ACADM PE=1 SV=1	0	22.0483	18.7648	8	11	8	1	421	46.559	8.37	7	4	6	3
FALSE	High	Master Protein	Q86VP6	Cullin-associated NEDD8-dissociated protein 1 OS=Homo sapiens GN=CAND1 PE=1 SV=2	0	56.11	18.6992	21	33	21	1	1230	136.289	5.78	7	26	7	20
FALSE	High	Master Protein	P84098	60S ribosomal protein L19 OS=Homo sapiens GN=RPL19 PE=1 SV=1	0	16.9298	18.3673	4	16	4	1	196	23.451	11.47	7	9	3	4
FALSE	High	Master Protein	Q8N163	Cell cycle and apoptosis regulator protein 2 OS=Homo sapiens GN=CCAR2 PE=1 SV=2	0	29.5555	16.468	11	17	11	1	923	102.838	5.22	7	10	7	9
FALSE	High	Master Protein	Q7L2E3	Putative ATP-dependent RNA helicase DHX30 OS=Homo sapiens GN=DHX30 PE=1 SV=1	0	33.9569	12.2278	13	18	13	1	1194	133.855	8.78	7	11	7	11
FALSE	High	Master Protein	Q9C075	Keratin, type I cytoskeletal 23 OS=Homo sapiens GN=KRT23 PE=1 SV=2	0	9.64612	9.71564	4	11	2	1	422	48.101	6.54	7	4	3	2
FALSE	High	Master Protein	Q14315	Filamin-C OS=Homo sapiens GN=FLNC PE=1 SV=3	0	46.8652	8.07339	17	23	13	1	2725	290.841	5.97	7	16	7	16
FALSE	High	Master Protein	O75179	Ankyrin repeat domain-containing protein 17 OS=Homo sapiens GN=ANKRD17 PE=1 SV=3	0	36.832	6.87668	13	20	9	1	2603	274.088	6.52	7	13	7	13
FALSE	High	Master Protein	Q96HU8	GTP-binding protein Di-Ras2 OS=Homo sapiens GN=DIRAS2 PE=1 SV=1	0.00342801	2.89688	5.52764	1	14	1	1	199	22.471	8.76	7	7	1	1
FALSE	High	Master Protein	Q7Z406	Myosin-14 OS=Homo sapiens GN=MYH14 PE=1 SV=2	0	22.0823	3.70927	7	13	2	1	1995	227.732	5.6	7	6	7	6
FALSE	High	Master Protein	Q15149	Plectin OS=Homo sapiens GN=PLEC PE=1 SV=3	0	25.5877	2.75406	10	11	7	1	4684	531.466	5.96	7	4	7	4
FALSE	High	Master Protein	Q15717	ELAV-like protein 1 OS=Homo sapiens GN=ELAVL1 PE=1 SV=2	0	60.5358	44.7853	11	23	11	1	326	36.069	9.17	6	17	6	11
FALSE	High	Master Protein	Q9HBM6	Transcription initiation factor TFIID subunit 9B OS=Homo sapiens GN=TAF9B PE=1 SV=1	0	27.9727	44.6215	9	15	5	1	251	27.604	9.55	6	9	6	6
FALSE	High	Master Protein	O43242	26S proteasome non-ATPase regulatory subunit 3 OS=Homo sapiens GN=PSMD3 PE=1 SV=2	0	96.3343	42.6966	23	36	23	1	534	60.939	8.44	6	30	6	23
FALSE	High	Master Protein	P62906	60S ribosomal protein L10a OS=Homo sapiens GN=RPL10A PE=1 SV=2	0	31.394	40.0922	8	15	8	1	217	24.816	9.94	6	9	6	6
FALSE	High	Master Protein	P40429	60S ribosomal protein L13a OS=Homo sapiens GN=RPL13A PE=1 SV=2	0	18.6795	33.9901	7	15	7	1	203	23.562	10.93	6	9	6	5
FALSE	High	Master Protein	Q53H96	Pyrroline-5-carboxylate reductase 3 OS=Homo sapiens GN=PYCRL PE=1 SV=3	0	21.3894	32.8467	7	14	7	1	274	28.645	7.72	6	8	5	7
FALSE	High	Master Protein	P51570	Galactokinase OS=Homo sapiens GN=GALK1 PE=1 SV=1	0	35.5579	30.102	12	16	12	1	392	42.246	6.46	6	10	6	10
FALSE	High	Master Protein	Q9P258	Protein RCC2 OS=Homo sapiens GN=RCC2 PE=1 SV=2	0	37.7731	29.3103	13	26	13	1	522	56.049	8.78	6	20	6	13
FALSE	High	Master Protein	P62753	40S ribosomal protein S6 OS=Homo sapiens GN=RPS6 PE=1 SV=1	0	29.8007	28.5141	8	22	8	1	249	28.663	10.84	6	16	3	8
FALSE	High	Master Protein	Q9H9A6	Leucine-rich repeat-containing protein 40 OS=Homo sapiens GN=LRRC40 PE=1 SV=1	0	35.5701	26.0797	15	22	15	1	602	68.207	6.43	6	16	4	15
FALSE	High	Master Protein	Q13490	Baculoviral IAP repeat-containing protein 2 OS=Homo sapiens GN=BIRC2 PE=1 SV=2	0	52.9649	26.0518	17	27	17	1	618	69.854	6.7	6	21	6	17
FALSE	High	Master Protein	P31151	Protein S100-A7 OS=Homo sapiens GN=S100A7 PE=1 SV=4	0	11.2805	24.7525	4	9	4	1	101	11.464	6.77	6	3	4	1
FALSE	High	Master Protein	Q13162	Peroxiredoxin-4 OS=Homo sapiens GN=PRDX4 PE=1 SV=1	0	27.2825	23.6162	5	19	3	1	271	30.521	6.29	6	13	3	5
FALSE	High	Master Protein	Q6YN16	Hydroxysteroid dehydrogenase-like protein 2 OS=Homo sapiens GN=HSDL2 PE=1 SV=1	0	20.4902	19.8565	6	13	6	1	418	45.366	7.99	6	7	4	6
FALSE	High	Master Protein	P55786	Puromycin-sensitive aminopeptidase OS=Homo sapiens GN=NPEPPS PE=1 SV=2	0	47.5092	19.1513	17	28	17	1	919	103.211	5.72	6	22	6	16
FALSE	High	Master Protein	P26640	Valine--tRNA ligase OS=Homo sapiens GN=VARS PE=1 SV=4	0	44.4152	17.9589	19	25	19	1	1264	140.387	7.59	6	19	6	18
FALSE	High	Master Protein	Q9ULV3	Cip1-interacting zinc finger protein OS=Homo sapiens GN=CIZ1 PE=1 SV=2	0	32.6962	16.147	11	19	11	1	898	99.983	6.11	6	13	6	11
FALSE	High	Master Protein	Q14671	Pumilio homolog 1 OS=Homo sapiens GN=PUM1 PE=1 SV=3	0	44.228	15.0927	15	23	12	1	1186	126.395	6.84	6	17	6	14
FALSE	High	Master Protein	P61313	60S ribosomal protein L15 OS=Homo sapiens GN=RPL15 PE=1 SV=2	0.000607903	5.92716	14.7059	3	14	3	1	204	24.131	11.62	6	8	2	2
FALSE	High	Master Protein	P28340	DNA polymerase delta catalytic subunit OS=Homo sapiens GN=POLD1 PE=1 SV=2	0	38.4112	13.2791	14	20	14	1	1107	123.553	7.03	6	14	6	14
FALSE	High	Master Protein	Q15517	Corneodesmosin OS=Homo sapiens GN=CDSN PE=1 SV=3	0	8.42247	9.64083	3	18	3	1	529	51.49	8.35	6	12	2	3
FALSE	High	Master Protein	Q8TF66	Leucine-rich repeat-containing protein 15 OS=Homo sapiens GN=LRRC15 PE=2 SV=2	0	12.4245	7.57315	5	6	5	1	581	64.325	6.71	6		5
FALSE	High	Master Protein	Q5D862	Filaggrin-2 OS=Homo sapiens GN=FLG2 PE=1 SV=1	0	22.535	6.9427	7	17	7	1	2391	247.928	8.31	6	11	5	5
FALSE	High	Master Protein	P07339	Cathepsin D OS=Homo sapiens GN=CTSD PE=1 SV=1	0.000607903	5.32978	6.5534	3	10	3	1	412	44.524	6.54	6	4	3	1
FALSE	High	Master Protein	P46109	Crk-like protein OS=Homo sapiens GN=CRKL PE=1 SV=1	0	62.4918	51.1551	13	31	13	1	303	33.756	6.74	5	26	4	13
FALSE	High	Master Protein	P50402	Emerin OS=Homo sapiens GN=EMD PE=1 SV=1	0	30.3134	38.9764	7	15	7	1	254	28.976	5.5	5	10	4	7
FALSE	High	Master Protein	P27635	60S ribosomal protein L10 OS=Homo sapiens GN=RPL10 PE=1 SV=4	0	36.7897	35.9813	8	19	8	1	214	24.588	10.08	5	14	4	8
FALSE	High	Master Protein	Q92900	Regulator of nonsense transcripts 1 OS=Homo sapiens GN=UPF1 PE=1 SV=2	0	119.185	35.5182	34	73	34	1	1129	124.267	6.61	5	68	5	34
FALSE	High	Master Protein	P78371	T-complex protein 1 subunit beta OS=Homo sapiens GN=CCT2 PE=1 SV=4	0	42.2757	34.0187	15	22	15	1	535	57.452	6.46	5	17	5	13
FALSE	High	Master Protein	P61962	DDB1- and CUL4-associated factor 7 OS=Homo sapiens GN=DCAF7 PE=1 SV=1	0	35.7901	32.1637	10	19	10	1	342	38.901	5.52	5	14	5	10
FALSE	High	Master Protein	Q15645	Pachytene checkpoint protein 2 homolog OS=Homo sapiens GN=TRIP13 PE=1 SV=2	0	42.9969	28.7037	12	19	12	1	432	48.52	6.09	5	14	5	12
FALSE	High	Master Protein	P56545	C-terminal-binding protein 2 OS=Homo sapiens GN=CTBP2 PE=1 SV=1	0	37.7824	27.6404	10	16	6	1	445	48.914	6.95	5	11	4	10
FALSE	High	Master Protein	Q00325	Phosphate carrier protein, mitochondrial OS=Homo sapiens GN=SLC25A3 PE=1 SV=2	0	31.6797	25.4144	11	20	11	1	362	40.069	9.38	5	15	4	9
FALSE	High	Master Protein	Q02978	Mitochondrial 2-oxoglutarate/malate carrier protein OS=Homo sapiens GN=SLC25A11 PE=1 SV=3	0	34.1629	25.1592	7	15	7	1	314	34.04	9.91	5	10	4	7
FALSE	High	Master Protein	O00303	Eukaryotic translation initiation factor 3 subunit F OS=Homo sapiens GN=EIF3F PE=1 SV=1	0	17.9842	20.4482	5	7	5	1	357	37.54	5.45	5	2	5	1
FALSE	High	Master Protein	Q14566	DNA replication licensing factor MCM6 OS=Homo sapiens GN=MCM6 PE=1 SV=1	0	50.8417	19.732	17	27	17	1	821	92.831	5.41	5	22	4	16
FALSE	High	Master Protein	P23258	Tubulin gamma-1 chain OS=Homo sapiens GN=TUBG1 PE=1 SV=2	0	30.7123	19.0687	8	14	8	1	451	51.138	6.14	5	9	2	8
FALSE	High	Master Protein	P50454	Serpin H1 OS=Homo sapiens GN=SERPINH1 PE=1 SV=2	0	19.5019	17.4641	6	12	6	1	418	46.411	8.69	5	7	2	6
FALSE	High	Master Protein	Q9NZB2	Constitutive coactivator of PPAR-gamma-like protein 1 OS=Homo sapiens GN=FAM120A PE=1 SV=2	0	32.0053	16.6369	14	17	13	1	1118	121.811	8.88	5	12	5	11
FALSE	High	Master Protein	Q9H0S4	Probable ATP-dependent RNA helicase DDX47 OS=Homo sapiens GN=DDX47 PE=1 SV=1	0	15.9888	16.4835	6	10	6	1	455	50.615	9.1	5	5	4	5
FALSE	High	Master Protein	P13010	X-ray repair cross-complementing protein 5 OS=Homo sapiens GN=XRCC5 PE=1 SV=3	0	30.2051	15.847	11	15	11	1	732	82.652	5.81	5	10	5	10
FALSE	High	Master Protein	O75190	DnaJ homolog subfamily B member 6 OS=Homo sapiens GN=DNAJB6 PE=1 SV=2	0	16.5471	15.3374	5	11	5	1	326	36.065	9.16	5	6	4	4
FALSE	High	Master Protein	P46940	Ras GTPase-activating-like protein IQGAP1 OS=Homo sapiens GN=IQGAP1 PE=1 SV=1	0	50.4311	13.3374	19	24	18	1	1657	189.134	6.48	5	19	5	19
FALSE	High	Master Protein	B5ME19	Eukaryotic translation initiation factor 3 subunit C-like protein OS=Homo sapiens GN=EIF3CL PE=3 SV=1	0	31.6923	12.1444	12	18	12	1	914	105.407	5.64	5	13	4	11
FALSE	High	Master Protein	P46776	60S ribosomal protein L27a OS=Homo sapiens GN=RPL27A PE=1 SV=2	0.000607903	6.30279	8.78378	2	13	2	1	148	16.551	11	5	8	2	2
FALSE	High	Master Protein	Q9BPX3	Condensin complex subunit 3 OS=Homo sapiens GN=NCAPG PE=1 SV=1	0	21.1205	8.17734	7	13	7	1	1015	114.262	5.59	5	8	5	7
FALSE	High	Master Protein	Q9UGM3	Deleted in malignant brain tumors 1 protein OS=Homo sapiens GN=DMBT1 PE=1 SV=2	0.000607903	5.20294	6.96229	1	9	1	1	2413	260.569	5.44	5	4	1	1
FALSE	High	Master Protein	P42357	Histidine ammonia-lyase OS=Homo sapiens GN=HAL PE=1 SV=1	0	10.5793	6.69711	4	12	4	1	657	72.652	6.95	5	7	3	4
FALSE	High	Master Protein	Q9UPQ9	Trinucleotide repeat-containing gene 6B protein OS=Homo sapiens GN=TNRC6B PE=1 SV=4	0	14.6635	5.18276	6	8	6	1	1833	193.883	6.76	5	3	5	2
FALSE	High	Master Protein	Q16563	Synaptophysin-like protein 1 OS=Homo sapiens GN=SYPL1 PE=1 SV=1	0.00499093	2.44745	4.2471	1	7	1	1	259	28.547	8.43	5	2	1	1
FALSE	High	Master Protein	Q14980	Nuclear mitotic apparatus protein 1 OS=Homo sapiens GN=NUMA1 PE=1 SV=2	0	18.0101	3.40426	7	10	7	1	2115	238.115	5.78	5	5	5	5
FALSE	High	Master Protein	P01834	Ig kappa chain C region OS=Homo sapiens GN=IGKC PE=1 SV=1	0	14.3975	50.9434	3	9	3	1	106	11.602	5.87	4	5	1	3
FALSE	High	Master Protein	Q9Y224	UPF0568 protein C14orf166 OS=Homo sapiens GN=C14orf166 PE=1 SV=1	0	40.694	49.5902	11	17	11	1	244	28.051	6.65	4	13	3	10
FALSE	High	Master Protein	P32119	Peroxiredoxin-2 OS=Homo sapiens GN=PRDX2 PE=1 SV=5	0	57.2017	44.4444	12	30	11	1	198	21.878	5.97	4	26	2	12
FALSE	High	Master Protein	P46777	60S ribosomal protein L5 OS=Homo sapiens GN=RPL5 PE=1 SV=3	0	40.1476	41.0774	11	20	11	1	297	34.341	9.72	4	16	2	11
FALSE	High	Master Protein	P35520	Cystathionine beta-synthase OS=Homo sapiens GN=CBS PE=1 SV=2	0	62.839	38.8385	19	37	19	1	551	60.548	6.65	4	33	4	19
FALSE	High	Master Protein	Q9NZI8	Insulin-like growth factor 2 mRNA-binding protein 1 OS=Homo sapiens GN=IGF2BP1 PE=1 SV=2	0	64.2552	38.3016	19	28	17	1	577	63.441	9.2	4	24	3	19
FALSE	High	Master Protein	P54136	Arginine--tRNA ligase, cytoplasmic OS=Homo sapiens GN=RARS PE=1 SV=2	0	81.949	37.7273	22	36	22	1	660	75.331	6.68	4	32	4	21
FALSE	High	Master Protein	P39023	60S ribosomal protein L3 OS=Homo sapiens GN=RPL3 PE=1 SV=2	0	60.7241	35.4839	19	36	19	1	403	46.08	10.18	4	32	4	19
FALSE	High	Master Protein	Q9BV20	Methylthioribose-1-phosphate isomerase OS=Homo sapiens GN=MRI1 PE=1 SV=1	0	29.6487	34.6883	9	13	9	1	369	39.125	6.3	4	9	4	9
FALSE	High	Master Protein	Q16594	Transcription initiation factor TFIID subunit 9 OS=Homo sapiens GN=TAF9 PE=1 SV=1	0	22.0194	34.0909	7	13	3	1	264	28.956	8.66	4	9	4	6
FALSE	High	Master Protein	P48643	T-complex protein 1 subunit epsilon OS=Homo sapiens GN=CCT5 PE=1 SV=1	0	72.2086	33.6414	19	32	18	1	541	59.633	5.66	4	28	4	18
FALSE	High	Master Protein	P07195	L-lactate dehydrogenase B chain OS=Homo sapiens GN=LDHB PE=1 SV=2	0	25.6129	28.7425	9	21	8	1	334	36.615	6.05	4	17	3	9
FALSE	High	Master Protein	P22695	Cytochrome b-c1 complex subunit 2, mitochondrial OS=Homo sapiens GN=UQCRC2 PE=1 SV=3	0	44.9211	27.3731	9	15	9	1	453	48.413	8.63	4	11	3	9
FALSE	High	Master Protein	P36542	ATP synthase subunit gamma, mitochondrial OS=Homo sapiens GN=ATP5C1 PE=1 SV=1	0	28.5768	27.1812	7	14	7	1	298	32.975	9.22	4	10	4	7
FALSE	High	Master Protein	Q96GD0	Pyridoxal phosphate phosphatase OS=Homo sapiens GN=PDXP PE=1 SV=2	0	16.9793	24.6622	5	10	5	1	296	31.678	6.55	4	6	3	5
FALSE	High	Master Protein	Q92499	ATP-dependent RNA helicase DDX1 OS=Homo sapiens GN=DDX1 PE=1 SV=2	0	39.2975	24.0541	16	22	16	1	740	82.38	7.23	4	18	4	16
FALSE	High	Master Protein	Q9UBB4	Ataxin-10 OS=Homo sapiens GN=ATXN10 PE=1 SV=1	0	23.3487	22.1053	8	10	8	1	475	53.455	5.25	4	6	4	6
FALSE	High	Master Protein	P10599	Thioredoxin OS=Homo sapiens GN=TXN PE=1 SV=3	0	7.14135	20.9524	2	10	2	1	105	11.73	4.92	4	6	1	2
FALSE	High	Master Protein	Q6UWP8	Suprabasin OS=Homo sapiens GN=SBSN PE=1 SV=2	0	19.3293	20.678	4	19	4	1	590	60.505	7.01	4	15	2	4
FALSE	High	Master Protein	P24941	Cyclin-dependent kinase 2 OS=Homo sapiens GN=CDK2 PE=1 SV=2	0	15.1427	20.1342	6	10	4	1	298	33.908	8.68	4	6	4	6
FALSE	High	Master Protein	P62805	Histone H4 OS=Homo sapiens GN=HIST1H4A PE=1 SV=2	0.00158144	3.81395	19.4175	2	6	2	1	103	11.36	11.36	4	2	2	1
FALSE	High	Master Protein	Q15750	TGF-beta-activated kinase 1 and MAP3K7-binding protein 1 OS=Homo sapiens GN=TAB1 PE=1 SV=1	0	23.5825	18.254	8	14	8	1	504	54.61	5.52	4	10	3	8
FALSE	High	Master Protein	P31942	Heterogeneous nuclear ribonucleoprotein H3 OS=Homo sapiens GN=HNRNPH3 PE=1 SV=2	0	16.2241	17.9191	5	9	5	1	346	36.903	6.87	4	5	3	4
FALSE	High	Master Protein	Q96RQ3	Methylcrotonoyl-CoA carboxylase subunit alpha, mitochondrial OS=Homo sapiens GN=MCCC1 PE=1 SV=3	0	34.2102	17.1034	13	18	13	1	725	80.422	7.78	4	14	4	12
FALSE	High	Master Protein	Q01469	Fatty acid-binding protein, epidermal OS=Homo sapiens GN=FABP5 PE=1 SV=3	0	8.61556	17.037	2	9	2	1	135	15.155	7.01	4	5	2	2
FALSE	High	Master Protein	Q14157	Ubiquitin-associated protein 2-like OS=Homo sapiens GN=UBAP2L PE=1 SV=2	0	47.9979	15.8234	13	31	13	1	1087	114.465	7.11	4	27	4	13
FALSE	High	Master Protein	O60264	SWI/SNF-related matrix-associated actin-dependent regulator of chromatin subfamily A member 5 OS=Homo sapiens GN=SMARCA5 PE=1 SV=1	0	38.945	14.4487	15	20	15	1	1052	121.828	8.09	4	16	4	15
FALSE	High	Master Protein	O43837	Isocitrate dehydrogenase [NAD] subunit beta, mitochondrial OS=Homo sapiens GN=IDH3B PE=1 SV=2	0	15.8076	14.2857	5	8	5	1	385	42.157	8.46	4	4	4	4
FALSE	High	Master Protein	O14874	[3-methyl-2-oxobutanoate dehydrogenase [lipoamide]] kinase, mitochondrial OS=Homo sapiens GN=BCKDK PE=1 SV=2	0	14.4	14.0777	4	8	4	1	412	46.331	8.82	4	4	3	3
FALSE	High	Master Protein	P02545	Prelamin-A/C OS=Homo sapiens GN=LMNA PE=1 SV=1	0	22.6293	13.7048	7	12	7	1	664	74.095	7.02	4	8	3	6
FALSE	High	Master Protein	P19367	Hexokinase-1 OS=Homo sapiens GN=HK1 PE=1 SV=3	0	28.6348	12.9771	12	15	10	1	917	102.42	6.8	4	11	4	11
FALSE	High	Master Protein	P43243	Matrin-3 OS=Homo sapiens GN=MATR3 PE=1 SV=2	0	24.0768	12.3967	11	16	11	1	847	94.565	6.25	4	12	4	10
FALSE	High	Master Protein	O00425	Insulin-like growth factor 2 mRNA-binding protein 3 OS=Homo sapiens GN=IGF2BP3 PE=1 SV=2	0	22.9042	11.7444	6	14	4	1	579	63.666	8.87	4	10	3	6
FALSE	High	Master Protein	P55265	Double-stranded RNA-specific adenosine deaminase OS=Homo sapiens GN=ADAR PE=1 SV=4	0	38.0617	11.1746	15	19	15	1	1226	135.981	8.65	4	15	4	15
FALSE	High	Master Protein	Q9BW92	Threonine--tRNA ligase, mitochondrial OS=Homo sapiens GN=TARS2 PE=1 SV=1	0	16.9747	11.0028	7	11	7	1	718	80.985	7.3	4	7	3	7
FALSE	High	Master Protein	O00410	Importin-5 OS=Homo sapiens GN=IPO5 PE=1 SV=4	0	28.1171	10.8478	9	14	9	1	1097	123.55	4.94	4	10	4	9
FALSE	High	Master Protein	P13804	Electron transfer flavoprotein subunit alpha, mitochondrial OS=Homo sapiens GN=ETFA PE=1 SV=1	0	14.0941	9.60961	2	12	2	1	333	35.058	8.38	4	8	1	2
FALSE	High	Master Protein	Q6ZVX7	F-box only protein 50 OS=Homo sapiens GN=NCCRP1 PE=1 SV=1	0	10.6698	8.36364	2	10	2	1	275	30.828	6.62	4	6	2	2
FALSE	High	Master Protein	Q14C86	GTPase-activating protein and VPS9 domain-containing protein 1 OS=Homo sapiens GN=GAPVD1 PE=1 SV=2	0	19.1059	6.56292	8	14	8	1	1478	164.876	5.22	4	10	4	8
FALSE	High	Master Protein	A5YKK6	CCR4-NOT transcription complex subunit 1 OS=Homo sapiens GN=CNOT1 PE=1 SV=2	0	25.6282	5.21886	11	14	11	1	2376	266.768	7.11	4	10	3	10
FALSE	High	Master Protein	Q8IWZ3	Ankyrin repeat and KH domain-containing protein 1 OS=Homo sapiens GN=ANKHD1 PE=1 SV=1	0	25.0213	4.95673	9	13	5	1	2542	269.291	5.73	4	9	4	9
FALSE	High	Master Protein	Q86SJ6	Desmoglein-4 OS=Homo sapiens GN=DSG4 PE=1 SV=1	0	9.34146	4.13462	4	7	3	1	1040	113.751	4.56	4	3	4	1
FALSE	High	Master Protein	O00763	Acetyl-CoA carboxylase 2 OS=Homo sapiens GN=ACACB PE=1 SV=3	0	21.4253	3.4581	6	8	2	1	2458	276.365	6.49	4	4	4	4
FALSE	High	Master Protein	O75376	Nuclear receptor corepressor 1 OS=Homo sapiens GN=NCOR1 PE=1 SV=2	0	15.419	2.58197	5	5	5	1	2440	270.044	7.11	4	1	4	1
FALSE	High	Master Protein	O76031	ATP-dependent Clp protease ATP-binding subunit clpX-like, mitochondrial OS=Homo sapiens GN=CLPX PE=1 SV=2	0.00202122	3.33283	2.05371	1	6	1	1	633	69.181	7.58	4	2	1	1
FALSE	Medium	Master Protein	Q8NFZ5	TNFAIP3-interacting protein 2 OS=Homo sapiens GN=TNIP2 PE=1 SV=1	0.0133065	1.84103	1.8648	1	9	1	1	429	48.669	6.44	4	5	1	1
FALSE	High	Master Protein	P00492	Hypoxanthine-guanine phosphoribosyltransferase OS=Homo sapiens GN=HPRT1 PE=1 SV=2	0	60.114	61.9266	15	28	14	1	218	24.564	6.68	3	25	3	15
FALSE	High	Master Protein	P62258	14-3-3 protein epsilon OS=Homo sapiens GN=YWHAE PE=1 SV=1	0	42.71	48.6275	14	21	12	1	255	29.155	4.74	3	18	2	14
FALSE	High	Master Protein	P27348	14-3-3 protein theta OS=Homo sapiens GN=YWHAQ PE=1 SV=1	0	52.0305	42.8571	15	21	11	1	245	27.747	4.78	3	18	3	15
FALSE	High	Master Protein	P60891	Ribose-phosphate pyrophosphokinase 1 OS=Homo sapiens GN=PRPS1 PE=1 SV=2	0	34.1579	39.6226	9	15	5	1	318	34.812	6.98	3	12	3	9
FALSE	High	Master Protein	P12277	Creatine kinase B-type OS=Homo sapiens GN=CKB PE=1 SV=1	0	44.183	38.0577	11	25	11	1	381	42.617	5.59	3	22	3	10
FALSE	High	Master Protein	P50990	T-complex protein 1 subunit theta OS=Homo sapiens GN=CCT8 PE=1 SV=4	0	59.2011	37.7737	17	24	17	1	548	59.583	5.6	3	21	3	17
FALSE	High	Master Protein	Q8WUM4	Programmed cell death 6-interacting protein OS=Homo sapiens GN=PDCD6IP PE=1 SV=1	0	116.329	36.7512	30	55	30	1	868	95.963	6.52	3	52	3	30
FALSE	High	Master Protein	Q9Y295	Developmentally-regulated GTP-binding protein 1 OS=Homo sapiens GN=DRG1 PE=1 SV=1	0	25.7832	34.8774	9	11	8	1	367	40.517	8.9	3	8	3	8
FALSE	High	Master Protein	P11940	Polyadenylate-binding protein 1 OS=Homo sapiens GN=PABPC1 PE=1 SV=2	0	86.2972	34.2767	23	50	16	1	636	70.626	9.5	3	47	3	23
FALSE	High	Master Protein	Q6PI48	Aspartate--tRNA ligase, mitochondrial OS=Homo sapiens GN=DARS2 PE=1 SV=1	0	52.6762	32.2481	16	23	16	1	645	73.516	8.02	3	20	3	16
FALSE	High	Master Protein	P10809	60 kDa heat shock protein, mitochondrial OS=Homo sapiens GN=HSPD1 PE=1 SV=2	0	43.8444	30.8901	14	22	14	1	573	61.016	5.87	3	19	3	14
FALSE	High	Master Protein	P32969	60S ribosomal protein L9 OS=Homo sapiens GN=RPL9 PE=1 SV=1	0	33.4801	30.7292	7	14	7	1	192	21.85	9.95	3	11	2	7
FALSE	High	Master Protein	Q00535	Cyclin-dependent-like kinase 5 OS=Homo sapiens GN=CDK5 PE=1 SV=3	0	18.0511	29.7945	8	11	7	1	292	33.283	7.66	3	8	3	8
FALSE	High	Master Protein	Q13642	Four and a half LIM domains protein 1 OS=Homo sapiens GN=FHL1 PE=1 SV=4	0	38.7805	29.1022	9	17	9	1	323	36.239	8.97	3	14	3	9
FALSE	High	Master Protein	Q8NC51	Plasminogen activator inhibitor 1 RNA-binding protein OS=Homo sapiens GN=SERBP1 PE=1 SV=2	0	32.3716	28.9216	10	24	10	1	408	44.938	8.65	3	21	2	10
FALSE	High	Master Protein	P46778	60S ribosomal protein L21 OS=Homo sapiens GN=RPL21 PE=1 SV=2	0	12.2492	27.5	3	11	3	1	160	18.553	10.49	3	8	2	3
FALSE	High	Master Protein	O43175	D-3-phosphoglycerate dehydrogenase OS=Homo sapiens GN=PHGDH PE=1 SV=4	0	46.0623	27.3921	12	22	12	1	533	56.614	6.71	3	19	3	12
FALSE	High	Master Protein	Q9BZX2	Uridine-cytidine kinase 2 OS=Homo sapiens GN=UCK2 PE=1 SV=1	0	25.9553	26.0536	7	11	6	1	261	29.281	6.7	3	8	3	7
FALSE	High	Master Protein	P26196	Probable ATP-dependent RNA helicase DDX6 OS=Homo sapiens GN=DDX6 PE=1 SV=2	0	25.6257	25.2588	10	12	10	1	483	54.382	8.66	3	9	3	9
FALSE	High	Master Protein	P45880	Voltage-dependent anion-selective channel protein 2 OS=Homo sapiens GN=VDAC2 PE=1 SV=2	0	17.8868	24.1497	6	9	6	1	294	31.547	7.56	3	6	3	6
FALSE	High	Master Protein	Q96HS1	Serine/threonine-protein phosphatase PGAM5, mitochondrial OS=Homo sapiens GN=PGAM5 PE=1 SV=2	0	16.6665	23.5294	6	11	6	1	289	31.985	8.68	3	8	3	5
FALSE	High	Master Protein	P46779	60S ribosomal protein L28 OS=Homo sapiens GN=RPL28 PE=1 SV=3	0	9.68604	23.3577	4	9	4	1	137	15.738	12.02	3	6	3	4
FALSE	High	Master Protein	Q53GQ0	Very-long-chain 3-oxoacyl-CoA reductase OS=Homo sapiens GN=HSD17B12 PE=1 SV=2	0	26.2121	22.1154	6	8	6	1	312	34.302	9.32	3	5	3	4
FALSE	High	Master Protein	Q92945	Far upstream element-binding protein 2 OS=Homo sapiens GN=KHSRP PE=1 SV=4	0	52.8083	21.6596	13	27	12	1	711	73.07	7.3	3	24	3	13
FALSE	High	Master Protein	P49005	DNA polymerase delta subunit 2 OS=Homo sapiens GN=POLD2 PE=1 SV=1	0	30.2162	21.5352	8	13	8	1	469	51.257	5.58	3	10	3	8
FALSE	High	Master Protein	Q15542	Transcription initiation factor TFIID subunit 5 OS=Homo sapiens GN=TAF5 PE=1 SV=3	0	35.9881	21.375	13	18	13	1	800	86.776	5.64	3	15	3	13
FALSE	High	Master Protein	P00390	Glutathione reductase, mitochondrial OS=Homo sapiens GN=GSR PE=1 SV=2	0	25.6707	19.1571	8	13	8	1	522	56.221	8.5	3	10	3	8
FALSE	High	Master Protein	P57088	Transmembrane protein 33 OS=Homo sapiens GN=TMEM33 PE=1 SV=2	0	14.6379	17.8138	4	7	4	1	247	27.96	9.7	3	4	3	4
FALSE	High	Master Protein	Q86X55	Histone-arginine methyltransferase CARM1 OS=Homo sapiens GN=CARM1 PE=1 SV=3	0	36.7721	17.7632	11	17	11	1	608	65.811	6.73	3	14	2	11
FALSE	High	Master Protein	P21333	Filamin-A OS=Homo sapiens GN=FLNA PE=1 SV=4	0	87.2097	17.0759	29	34	27	1	2647	280.564	6.06	3	31	3	29
FALSE	High	Master Protein	Q14103	Heterogeneous nuclear ribonucleoprotein D0 OS=Homo sapiens GN=HNRNPD PE=1 SV=1	0	19.0655	16.6197	6	12	4	1	355	38.41	7.81	3	9	3	5
FALSE	High	Master Protein	P52789	Hexokinase-2 OS=Homo sapiens GN=HK2 PE=1 SV=2	0	41.411	16.3577	13	17	11	1	917	102.313	6.05	3	14	3	13
FALSE	High	Master Protein	Q13310	Polyadenylate-binding protein 4 OS=Homo sapiens GN=PABPC4 PE=1 SV=1	0	32.5235	15.8385	10	22	3	1	644	70.738	9.26	3	19	3	10
FALSE	High	Master Protein	Q9UNQ2	Probable dimethyladenosine transferase OS=Homo sapiens GN=DIMT1 PE=1 SV=1	0	12.3476	15.3355	5	7	5	1	313	35.214	9.99	3	4	3	4
FALSE	High	Master Protein	Q9H974	Queuine tRNA-ribosyltransferase subunit QTRTD1 OS=Homo sapiens GN=QTRTD1 PE=1 SV=1	0	18.0298	15.1807	5	9	5	1	415	46.683	6.81	3	6	2	5
FALSE	High	Master Protein	P04843	Dolichyl-diphosphooligosaccharide--protein glycosyltransferase subunit 1 OS=Homo sapiens GN=RPN1 PE=1 SV=1	0	32.0886	14.827	7	13	7	1	607	68.527	6.38	3	10	2	7
FALSE	High	Master Protein	Q9Y678	Coatomer subunit gamma-1 OS=Homo sapiens GN=COPG1 PE=1 SV=1	0	29.0832	14.6453	11	14	9	1	874	97.655	5.47	3	11	3	10
FALSE	High	Master Protein	Q9UBX3	Mitochondrial dicarboxylate carrier OS=Homo sapiens GN=SLC25A10 PE=1 SV=2	0	10.2826	14.6341	4	7	4	1	287	31.262	9.54	3	4	3	4
FALSE	High	Master Protein	P37198	Nuclear pore glycoprotein p62 OS=Homo sapiens GN=NUP62 PE=1 SV=3	0	25.0388	14.5594	6	10	6	1	522	53.222	5.31	3	7	3	6
FALSE	High	Master Protein	P11177	Pyruvate dehydrogenase E1 component subunit beta, mitochondrial OS=Homo sapiens GN=PDHB PE=1 SV=3	0	12.0977	13.9276	4	6	4	1	359	39.208	6.65	3	3	2	3
FALSE	High	Master Protein	Q9HA64	Ketosamine-3-kinase OS=Homo sapiens GN=FN3KRP PE=1 SV=2	0	8.90255	13.9159	4	8	4	1	309	34.39	7.33	3	5	2	4
FALSE	High	Master Protein	Q9H936	Mitochondrial glutamate carrier 1 OS=Homo sapiens GN=SLC25A22 PE=1 SV=1	0	14.2416	13.6223	4	7	4	1	323	34.448	9.29	3	4	3	4
FALSE	High	Master Protein	P55084	Trifunctional enzyme subunit beta, mitochondrial OS=Homo sapiens GN=HADHB PE=1 SV=3	0	12.9425	13.5021	6	9	6	1	474	51.262	9.41	3	6	3	6
FALSE	High	Master Protein	Q9NYJ8	TGF-beta-activated kinase 1 and MAP3K7-binding protein 2 OS=Homo sapiens GN=TAB2 PE=1 SV=1	0	20.6878	13.2756	7	9	7	1	693	76.447	8.54	3	6	3	6
FALSE	High	Master Protein	P82650	28S ribosomal protein S22, mitochondrial OS=Homo sapiens GN=MRPS22 PE=1 SV=1	0	8.48974	13.0556	4	4	4	1	360	41.254	7.9	3	1	3	1
FALSE	High	Master Protein	Q9ULX3	RNA-binding protein NOB1 OS=Homo sapiens GN=NOB1 PE=1 SV=1	0	16.1264	12.8641	6	10	6	1	412	46.646	7.18	3	7	2	6
FALSE	High	Master Protein	O94906	Pre-mRNA-processing factor 6 OS=Homo sapiens GN=PRPF6 PE=1 SV=1	0	24.5351	12.0085	11	13	11	1	941	106.858	8.25	3	10	3	10
FALSE	High	Master Protein	Q9UQE7	Structural maintenance of chromosomes protein 3 OS=Homo sapiens GN=SMC3 PE=1 SV=2	0	29.5877	11.9145	11	14	11	1	1217	141.454	7.18	3	11	3	9
FALSE	High	Master Protein	P02786	Transferrin receptor protein 1 OS=Homo sapiens GN=TFRC PE=1 SV=2	0	21.6817	11.5789	7	10	7	1	760	84.818	6.61	3	7	3	7
FALSE	High	Master Protein	P06702	Protein S100-A9 OS=Homo sapiens GN=S100A9 PE=1 SV=1	0.00765632	2.20768	11.4035	1	5	1	1	114	13.234	6.13	3	2	1	1
FALSE	High	Master Protein	Q9Y2T2	AP-3 complex subunit mu-1 OS=Homo sapiens GN=AP3M1 PE=1 SV=1	0	16.2941	11.0048	4	7	4	1	418	46.909	6.93	3	4	3	3
FALSE	High	Master Protein	Q5BKZ1	DBIRD complex subunit ZNF326 OS=Homo sapiens GN=ZNF326 PE=1 SV=2	0	19.9245	10.8247	5	9	5	1	582	65.613	5.15	3	6	3	5
FALSE	High	Master Protein	P05165	Propionyl-CoA carboxylase alpha chain, mitochondrial OS=Homo sapiens GN=PCCA PE=1 SV=4	0	17.6749	10.7143	6	9	6	1	728	80.008	7.52	3	6	3	6
FALSE	High	Master Protein	Q15118	[Pyruvate dehydrogenase (acetyl-transferring)] kinase isozyme 1, mitochondrial OS=Homo sapiens GN=PDK1 PE=1 SV=1	0	10.4768	10.5505	4	6	4	1	436	49.213	8.81	3	3	3	3
FALSE	High	Master Protein	P55884	Eukaryotic translation initiation factor 3 subunit B OS=Homo sapiens GN=EIF3B PE=1 SV=3	0	27.6878	10.3194	8	14	8	1	814	92.424	5	3	11	3	8
FALSE	High	Master Protein	Q9BXW7	Cat eye syndrome critical region protein 5 OS=Homo sapiens GN=CECR5 PE=1 SV=1	0	10.2087	9.92908	4	6	4	1	423	46.292	8.13	3	3	3	3
FALSE	High	Master Protein	P16615	Sarcoplasmic/endoplasmic reticulum calcium ATPase 2 OS=Homo sapiens GN=ATP2A2 PE=1 SV=1	0	23.0648	9.78887	9	14	9	1	1042	114.683	5.34	3	11	3	9
FALSE	High	Master Protein	Q9H0D6	5'-3' exoribonuclease 2 OS=Homo sapiens GN=XRN2 PE=1 SV=1	0	16.861	9.68421	6	10	6	1	950	108.513	7.47	3	7	3	5
FALSE	High	Master Protein	P60900	Proteasome subunit alpha type-6 OS=Homo sapiens GN=PSMA6 PE=1 SV=1	0.000607903	6.24113	8.94309	2	7	2	1	246	27.382	6.76	3	4	2	2
FALSE	High	Master Protein	P42704	Leucine-rich PPR motif-containing protein, mitochondrial OS=Homo sapiens GN=LRPPRC PE=1 SV=3	0	29.7635	8.89527	12	14	12	1	1394	157.805	6.13	3	11	3	11
FALSE	High	Master Protein	Q8IXT5	RNA-binding protein 12B OS=Homo sapiens GN=RBM12B PE=1 SV=2	0	14.1001	8.79121	5	8	5	1	1001	118.03	6.81	3	5	3	5
FALSE	High	Master Protein	Q9NRK6	ATP-binding cassette sub-family B member 10, mitochondrial OS=Homo sapiens GN=ABCB10 PE=1 SV=2	0	18.3926	8.67209	6	9	6	1	738	79.098	9.85	3	6	2	6
FALSE	High	Master Protein	Q9P2R7	Succinyl-CoA ligase [ADP-forming] subunit beta, mitochondrial OS=Homo sapiens GN=SUCLA2 PE=1 SV=3	0	11.2933	8.63931	4	7	4	1	463	50.285	7.42	3	4	3	4
FALSE	High	Master Protein	P52732	Kinesin-like protein KIF11 OS=Homo sapiens GN=KIF11 PE=1 SV=2	0	23.9285	8.61742	9	12	9	1	1056	119.085	5.64	3	9	3	9
FALSE	High	Master Protein	O95347	Structural maintenance of chromosomes protein 2 OS=Homo sapiens GN=SMC2 PE=1 SV=2	0	23.8002	8.5213	9	11	9	1	1197	135.572	8.43	3	8	3	8
FALSE	High	Master Protein	O95373	Importin-7 OS=Homo sapiens GN=IPO7 PE=1 SV=1	0	17.4875	7.89981	7	10	6	1	1038	119.44	4.82	3	7	2	7
FALSE	High	Master Protein	Q5VU13	V-set and immunoglobulin domain-containing protein 8 OS=Homo sapiens GN=VSIG8 PE=2 SV=1	0	7.83025	7.48792	3	3	3	1	414	43.863	7.2	3		3
FALSE	High	Master Protein	Q9BRX2	Protein pelota homolog OS=Homo sapiens GN=PELO PE=1 SV=2	0.000607903	6.0156	7.27273	3	6	3	1	385	43.332	6.34	3	3	3	3
FALSE	High	Master Protein	Q12933	TNF receptor-associated factor 2 OS=Homo sapiens GN=TRAF2 PE=1 SV=2	0	7.47415	6.98603	3	5	3	1	501	55.823	7.53	3	2	3	2
FALSE	High	Master Protein	Q15393	Splicing factor 3B subunit 3 OS=Homo sapiens GN=SF3B3 PE=1 SV=4	0	21.6107	6.90222	7	11	7	1	1217	135.492	5.26	3	8	3	6
FALSE	High	Master Protein	P39656	Dolichyl-diphosphooligosaccharide--protein glycosyltransferase 48 kDa subunit OS=Homo sapiens GN=DDOST PE=1 SV=4	0	7.34873	6.79825	3	5	3	1	456	50.769	6.55	3	2	3	2
FALSE	High	Master Protein	Q12756	Kinesin-like protein KIF1A OS=Homo sapiens GN=KIF1A PE=1 SV=2	0	22.8585	6.4497	9	15	9	1	1690	190.944	6.21	3	12	3	9
FALSE	High	Master Protein	Q06587	E3 ubiquitin-protein ligase RING1 OS=Homo sapiens GN=RING1 PE=1 SV=2	0	7.79832	6.15764	2	7	1	1	406	42.403	5.62	3	4	2	1
FALSE	High	Master Protein	Q92616	Translational activator GCN1 OS=Homo sapiens GN=GCN1L1 PE=1 SV=6	0	25.8239	4.4927	9	12	9	1	2671	292.572	7.47	3	9	3	9
FALSE	High	Master Protein	O75342	Arachidonate 12-lipoxygenase, 12R-type OS=Homo sapiens GN=ALOX12B PE=1 SV=1	0.000607903	6.00375	3.42368	2	3	2	1	701	80.304	7.64	3		2
FALSE	High	Master Protein	Q8WXX7	Autism susceptibility gene 2 protein OS=Homo sapiens GN=AUTS2 PE=1 SV=1	0.000607903	6.14681	3.25655	4	5	4	1	1259	138.897	9.38	3	2	3	2
FALSE	High	Master Protein	Q8TEM1	Nuclear pore membrane glycoprotein 210 OS=Homo sapiens GN=NUP210 PE=1 SV=3	0	8.65325	1.90779	3	4	3	1	1887	204.983	6.81	3	1	3	1
FALSE	Medium	Master Protein	Q9Y4D2	Sn1-specific diacylglycerol lipase alpha OS=Homo sapiens GN=DAGLA PE=1 SV=3	0.0246249	1.62893	0.767754	1	3	1	1	1042	114.879	6.35	3		1
FALSE	High	Master Protein	P04075	Fructose-bisphosphate aldolase A OS=Homo sapiens GN=ALDOA PE=1 SV=2	0	184.141	76.9231	27	102	23	1	364	39.395	8.09	2	100	2	27
FALSE	High	Master Protein	Q9GZP4	PITH domain-containing protein 1 OS=Homo sapiens GN=PITHD1 PE=1 SV=1	0	37.2124	57.8199	11	15	11	1	211	24.163	5.74	2	13	2	11
FALSE	High	Master Protein	P13797	Plastin-3 OS=Homo sapiens GN=PLS3 PE=1 SV=4	0	132.137	44.9206	29	62	29	1	630	70.766	5.6	2	60	2	29
FALSE	High	Master Protein	P22061	Protein-L-isoaspartate(D-aspartate) O-methyltransferase OS=Homo sapiens GN=PCMT1 PE=1 SV=4	0	51.125	39.6476	9	16	9	1	227	24.621	7.21	2	14	2	9
FALSE	High	Master Protein	Q16763	Ubiquitin-conjugating enzyme E2 S OS=Homo sapiens GN=UBE2S PE=1 SV=2	0	17.331	39.1892	5	7	5	1	222	23.831	8.38	2	5	2	4
FALSE	High	Master Protein	P41091	Eukaryotic translation initiation factor 2 subunit 3 OS=Homo sapiens GN=EIF2S3 PE=1 SV=3	0	36.5585	37.2881	13	16	13	1	472	51.077	8.4	2	14	2	13
FALSE	High	Master Protein	P51148	Ras-related protein Rab-5C OS=Homo sapiens GN=RAB5C PE=1 SV=2	0	27.0772	36.1111	6	11	4	1	216	23.468	8.41	2	9	2	6
FALSE	High	Master Protein	Q96IU4	Alpha/beta hydrolase domain-containing protein 14B OS=Homo sapiens GN=ABHD14B PE=1 SV=1	0	18.9875	32.8571	5	7	5	1	210	22.332	6.4	2	5	2	4
FALSE	High	Master Protein	P20340	Ras-related protein Rab-6A OS=Homo sapiens GN=RAB6A PE=1 SV=3	0	15.4561	31.7308	6	9	5	1	208	23.578	5.54	2	7	1	6
FALSE	High	Master Protein	Q14247	Src substrate cortactin OS=Homo sapiens GN=CTTN PE=1 SV=2	0	45.7323	31.6364	18	25	18	1	550	61.549	5.4	2	23	2	18
FALSE	High	Master Protein	P13489	Ribonuclease inhibitor OS=Homo sapiens GN=RNH1 PE=1 SV=2	0	35.2151	31.4534	11	14	11	1	461	49.941	4.82	2	12	1	11
FALSE	High	Master Protein	P61221	ATP-binding cassette sub-family E member 1 OS=Homo sapiens GN=ABCE1 PE=1 SV=1	0	60.3138	30.217	15	19	15	1	599	67.271	8.34	2	17	2	15
FALSE	High	Master Protein	Q9Y230	RuvB-like 2 OS=Homo sapiens GN=RUVBL2 PE=1 SV=3	0	37.6136	29.3737	13	17	13	1	463	51.125	5.64	2	15	2	13
FALSE	High	Master Protein	P17812	CTP synthase 1 OS=Homo sapiens GN=CTPS1 PE=1 SV=2	0	49.3415	28.7648	14	22	13	1	591	66.648	6.46	2	20	2	14
FALSE	High	Master Protein	Q9Y570	Protein phosphatase methylesterase 1 OS=Homo sapiens GN=PPME1 PE=1 SV=3	0	21.3893	28.4974	8	10	8	1	386	42.288	5.97	2	8	2	8
FALSE	High	Master Protein	P60174	Triosephosphate isomerase OS=Homo sapiens GN=TPI1 PE=1 SV=3	0	24.164	28.3217	6	15	6	1	286	30.772	5.92	2	13	2	6
FALSE	High	Master Protein	P22087	rRNA 2'-O-methyltransferase fibrillarin OS=Homo sapiens GN=FBL PE=1 SV=2	0	36.8855	27.4143	7	11	7	1	321	33.763	10.18	2	9	2	7
FALSE	High	Master Protein	P56537	Eukaryotic translation initiation factor 6 OS=Homo sapiens GN=EIF6 PE=1 SV=1	0	9.8408	26.9388	4	6	4	1	245	26.582	4.68	2	4	2	4
FALSE	High	Master Protein	P30048	Thioredoxin-dependent peroxide reductase, mitochondrial OS=Homo sapiens GN=PRDX3 PE=1 SV=3	0	11.5271	26.5625	4	6	4	1	256	27.675	7.78	2	4	2	4
FALSE	High	Master Protein	O43809	Cleavage and polyadenylation specificity factor subunit 5 OS=Homo sapiens GN=NUDT21 PE=1 SV=1	0	30.3302	26.4317	6	9	6	1	227	26.211	8.82	2	7	2	6
FALSE	High	Master Protein	P31153	S-adenosylmethionine synthase isoform type-2 OS=Homo sapiens GN=MAT2A PE=1 SV=1	0	27.8196	26.3291	10	12	10	1	395	43.633	6.48	2	10	2	10
FALSE	High	Master Protein	P11908	Ribose-phosphate pyrophosphokinase 2 OS=Homo sapiens GN=PRPS2 PE=1 SV=2	0	26.8001	26.1006	6	10	2	1	318	34.747	6.61	2	8	2	6
FALSE	High	Master Protein	Q9Y3A5	Ribosome maturation protein SBDS OS=Homo sapiens GN=SBDS PE=1 SV=4	0	12.596	24.8	5	8	5	1	250	28.745	8.75	2	6	2	5
FALSE	High	Master Protein	Q9UJS0	Calcium-binding mitochondrial carrier protein Aralar2 OS=Homo sapiens GN=SLC25A13 PE=1 SV=2	0	48.5298	24.5926	13	25	13	1	675	74.129	8.62	2	23	2	13
FALSE	High	Master Protein	Q9Y3I0	tRNA-splicing ligase RtcB homolog OS=Homo sapiens GN=RTCB PE=1 SV=1	0	44.2431	24.1584	11	22	11	1	505	55.175	7.23	2	20	2	11
FALSE	High	Master Protein	Q13363	C-terminal-binding protein 1 OS=Homo sapiens GN=CTBP1 PE=1 SV=2	0	31.4849	23.4091	8	11	4	1	440	47.505	6.77	2	9	2	8
FALSE	High	Master Protein	Q96C36	Pyrroline-5-carboxylate reductase 2 OS=Homo sapiens GN=PYCR2 PE=1 SV=1	0	17.0803	22.8125	6	9	5	1	320	33.616	7.77	2	7	2	6
FALSE	High	Master Protein	P61106	Ras-related protein Rab-14 OS=Homo sapiens GN=RAB14 PE=1 SV=4	0	17.0851	22.7907	5	8	4	1	215	23.882	6.21	2	6	1	5
FALSE	High	Master Protein	Q9UHJ6	Sedoheptulokinase OS=Homo sapiens GN=SHPK PE=1 SV=3	0	27.2397	22.3849	9	12	9	1	478	51.458	6.83	2	10	2	9
FALSE	High	Master Protein	Q12962	Transcription initiation factor TFIID subunit 10 OS=Homo sapiens GN=TAF10 PE=1 SV=1	0	9.54772	21.5596	3	5	3	1	218	21.698	6.57	2	3	2	3
FALSE	High	Master Protein	P49588	Alanine--tRNA ligase, cytoplasmic OS=Homo sapiens GN=AARS PE=1 SV=2	0	55.2765	21.1777	19	28	19	1	968	106.743	5.53	2	26	2	19
FALSE	High	Master Protein	Q8WXF1	Paraspeckle component 1 OS=Homo sapiens GN=PSPC1 PE=1 SV=1	0	33.592	21.0325	10	16	10	1	523	58.706	6.67	2	14	2	10
FALSE	High	Master Protein	Q15436	Protein transport protein Sec23A OS=Homo sapiens GN=SEC23A PE=1 SV=2	0	47.5471	20.915	13	17	11	1	765	86.105	7.08	2	15	1	13
FALSE	High	Master Protein	P23526	Adenosylhomocysteinase OS=Homo sapiens GN=AHCY PE=1 SV=4	0	31.7023	20.1389	8	14	8	1	432	47.685	6.34	2	12	2	8
FALSE	High	Master Protein	P48507	Glutamate--cysteine ligase regulatory subunit OS=Homo sapiens GN=GCLM PE=1 SV=1	0	21.8287	19.708	4	8	4	1	274	30.708	6.02	2	6	2	4
FALSE	High	Master Protein	P01034	Cystatin-C OS=Homo sapiens GN=CST3 PE=1 SV=1	0.000607903	4.83401	19.1781	2	3	2	1	146	15.789	8.75	2	1	2	1
FALSE	High	Master Protein	P59665	Neutrophil defensin 1 OS=Homo sapiens GN=DEFA1 PE=1 SV=1	0.00158144	4.20492	19.1489	2	4	2	1	94	10.194	6.99	2	2	2	1
FALSE	High	Master Protein	P62820	Ras-related protein Rab-1A OS=Homo sapiens GN=RAB1A PE=1 SV=3	0	8.54788	19.0244	3	7	1	1	205	22.663	6.21	2	5	1	3
FALSE	High	Master Protein	Q8NBS9	Thioredoxin domain-containing protein 5 OS=Homo sapiens GN=TXNDC5 PE=1 SV=2	0	23.9035	18.5185	8	10	8	1	432	47.599	5.97	2	8	2	8
FALSE	High	Master Protein	P22314	Ubiquitin-like modifier-activating enzyme 1 OS=Homo sapiens GN=UBA1 PE=1 SV=3	0	67.6233	18.431	17	29	17	1	1058	117.774	5.76	2	27	2	17
FALSE	High	Master Protein	Q9H0U4	Ras-related protein Rab-1B OS=Homo sapiens GN=RAB1B PE=1 SV=1	0	9.91895	18.408	3	7	1	1	201	22.157	5.73	2	5	1	3
FALSE	High	Master Protein	Q15286	Ras-related protein Rab-35 OS=Homo sapiens GN=RAB35 PE=1 SV=1	0	7.16554	18.408	3	6	2	1	201	23.011	8.29	2	4	1	3
FALSE	High	Master Protein	P25789	Proteasome subunit alpha type-4 OS=Homo sapiens GN=PSMA4 PE=1 SV=1	0	13.0494	18.0077	4	7	4	1	261	29.465	7.72	2	5	1	4
FALSE	High	Master Protein	Q6IAN0	Dehydrogenase/reductase SDR family member 7B OS=Homo sapiens GN=DHRS7B PE=1 SV=2	0	17.5922	17.2308	4	7	4	1	325	35.097	9.55	2	5	2	4
FALSE	High	Master Protein	P05388	60S acidic ribosomal protein P0 OS=Homo sapiens GN=RPLP0 PE=1 SV=1	0	14.0781	17.0347	5	7	5	1	317	34.252	5.97	2	5	2	5
FALSE	High	Master Protein	P61026	Ras-related protein Rab-10 OS=Homo sapiens GN=RAB10 PE=1 SV=1	0	7.0506	17	3	6	2	1	200	22.527	8.38	2	4	1	3
FALSE	High	Master Protein	O75369	Filamin-B OS=Homo sapiens GN=FLNB PE=1 SV=2	0	93.6422	16.5257	30	37	26	1	2602	277.99	5.73	2	35	2	30
FALSE	High	Master Protein	P55060	Exportin-2 OS=Homo sapiens GN=CSE1L PE=1 SV=3	0	38.3884	15.139	14	18	14	1	971	110.346	5.77	2	16	2	14
FALSE	High	Master Protein	P25205	DNA replication licensing factor MCM3 OS=Homo sapiens GN=MCM3 PE=1 SV=3	0	30.5115	15.099	11	15	11	1	808	90.924	5.77	2	13	2	11
FALSE	High	Master Protein	Q9Y277	Voltage-dependent anion-selective channel protein 3 OS=Homo sapiens GN=VDAC3 PE=1 SV=1	0	11.5072	14.4876	3	5	3	1	283	30.639	8.66	2	3	2	3
FALSE	High	Master Protein	P53621	Coatomer subunit alpha OS=Homo sapiens GN=COPA PE=1 SV=2	0	46.5684	14.134	17	22	17	1	1224	138.258	7.66	2	20	2	17
FALSE	High	Master Protein	P46459	Vesicle-fusing ATPase OS=Homo sapiens GN=NSF PE=1 SV=3	0	28.4721	14.1129	9	13	9	1	744	82.542	6.95	2	11	2	9
FALSE	High	Master Protein	P10321	HLA class I histocompatibility antigen, Cw-7 alpha chain OS=Homo sapiens GN=HLA-C PE=1 SV=3	0.000607903	5.98837	13.9344	3	4	2	1	366	40.623	6.04	2	2	2	2
FALSE	High	Master Protein	P04844	Dolichyl-diphosphooligosaccharide--protein glycosyltransferase subunit 2 OS=Homo sapiens GN=RPN2 PE=1 SV=3	0	19.2467	13.6292	5	8	5	1	631	69.241	5.69	2	6	2	5
FALSE	High	Master Protein	Q15437	Protein transport protein Sec23B OS=Homo sapiens GN=SEC23B PE=1 SV=2	0	29.6546	13.5593	9	12	7	1	767	86.424	6.89	2	10	1	9
FALSE	High	Master Protein	Q9UHB9	Signal recognition particle subunit SRP68 OS=Homo sapiens GN=SRP68 PE=1 SV=2	0	21.4193	13.3971	7	9	7	1	627	70.686	8.56	2	7	2	7
FALSE	High	Master Protein	P48730	Casein kinase I isoform delta OS=Homo sapiens GN=CSNK1D PE=1 SV=2	0	14.9282	13.253	5	8	1	1	415	47.3	9.74	2	6	2	5
FALSE	High	Master Protein	Q8WWM7	Ataxin-2-like protein OS=Homo sapiens GN=ATXN2L PE=1 SV=2	0	28.789	13.0233	13	18	13	1	1075	113.304	8.59	2	16	2	12
FALSE	High	Master Protein	P30566	Adenylosuccinate lyase OS=Homo sapiens GN=ADSL PE=1 SV=2	0	19.0669	13.0165	6	8	6	1	484	54.854	7.11	2	6	2	6
FALSE	High	Master Protein	P49674	Casein kinase I isoform epsilon OS=Homo sapiens GN=CSNK1E PE=1 SV=1	0	16.422	12.9808	5	7	1	1	416	47.285	9.66	2	5	2	5
FALSE	High	Master Protein	Q9NRN7	L-aminoadipate-semialdehyde dehydrogenase-phosphopantetheinyl transferase OS=Homo sapiens GN=AASDHPPT PE=1 SV=2	0	13.8457	12.945	4	9	4	1	309	35.753	6.8	2	7	2	4
FALSE	High	Master Protein	P49207	60S ribosomal protein L34 OS=Homo sapiens GN=RPL34 PE=1 SV=3	0.00158144	4.36514	12.8205	2	5	2	1	117	13.284	11.47	2	3	2	2
FALSE	High	Master Protein	P31930	Cytochrome b-c1 complex subunit 1, mitochondrial OS=Homo sapiens GN=UQCRC1 PE=1 SV=3	0	14.2898	12.7083	5	7	5	1	480	52.612	6.37	2	5	1	5
FALSE	High	Master Protein	Q13151	Heterogeneous nuclear ribonucleoprotein A0 OS=Homo sapiens GN=HNRNPA0 PE=1 SV=1	0	12.9742	12.459	3	5	2	1	305	30.822	9.29	2	3	2	3
FALSE	High	Master Protein	Q14694	Ubiquitin carboxyl-terminal hydrolase 10 OS=Homo sapiens GN=USP10 PE=1 SV=2	0	19.9581	12.406	8	12	8	1	798	87.08	5.31	2	10	2	8
FALSE	High	Master Protein	P83881	60S ribosomal protein L36a OS=Homo sapiens GN=RPL36A PE=1 SV=2	0.00158144	4.05524	12.2642	2	6	2	1	106	12.433	10.58	2	4	1	2
FALSE	High	Master Protein	Q15758	Neutral amino acid transporter B(0) OS=Homo sapiens GN=SLC1A5 PE=1 SV=2	0	21.1825	11.8299	5	13	5	1	541	56.562	5.48	2	11	2	5
FALSE	High	Master Protein	Q9NVP1	ATP-dependent RNA helicase DDX18 OS=Homo sapiens GN=DDX18 PE=1 SV=2	0	19.0723	11.791	7	8	7	1	670	75.359	9.5	2	6	2	6
FALSE	High	Master Protein	Q16822	Phosphoenolpyruvate carboxykinase [GTP], mitochondrial OS=Homo sapiens GN=PCK2 PE=1 SV=3	0	17.2273	11.7188	7	9	7	1	640	70.685	7.62	2	7	2	7
FALSE	High	Master Protein	Q8WVX9	Fatty acyl-CoA reductase 1 OS=Homo sapiens GN=FAR1 PE=1 SV=1	0	15.38	11.4563	5	7	5	1	515	59.319	9.17	2	5	2	5
FALSE	High	Master Protein	P28331	NADH-ubiquinone oxidoreductase 75 kDa subunit, mitochondrial OS=Homo sapiens GN=NDUFS1 PE=1 SV=3	0	16.7033	11.4168	7	9	7	1	727	79.417	6.23	2	7	2	7
FALSE	High	Master Protein	O14980	Exportin-1 OS=Homo sapiens GN=XPO1 PE=1 SV=1	0	31.9328	11.3912	9	12	9	1	1071	123.306	6.06	2	10	2	9
FALSE	High	Master Protein	Q86V81	THO complex subunit 4 OS=Homo sapiens GN=ALYREF PE=1 SV=3	0.000607903	5.32023	11.284	2	3	2	1	257	26.872	11.15	2	1	2	1
FALSE	High	Master Protein	P35250	Replication factor C subunit 2 OS=Homo sapiens GN=RFC2 PE=1 SV=3	0	10.3219	11.0169	3	5	3	1	354	39.132	6.44	2	3	2	3
FALSE	High	Master Protein	Q96EY1	DnaJ homolog subfamily A member 3, mitochondrial OS=Homo sapiens GN=DNAJA3 PE=1 SV=2	0	8.38918	10.8333	4	8	4	1	480	52.456	9.26	2	6	2	4
FALSE	High	Master Protein	Q12905	Interleukin enhancer-binding factor 2 OS=Homo sapiens GN=ILF2 PE=1 SV=2	0	7.72894	10.7692	3	5	3	1	390	43.035	5.26	2	3	2	3
FALSE	High	Master Protein	Q86XP3	ATP-dependent RNA helicase DDX42 OS=Homo sapiens GN=DDX42 PE=1 SV=1	0	24.9572	10.7676	9	12	9	1	938	102.912	7.02	2	10	2	9
FALSE	High	Master Protein	O14929	Histone acetyltransferase type B catalytic subunit OS=Homo sapiens GN=HAT1 PE=1 SV=1	0	11.08	10.7399	4	6	4	1	419	49.481	5.69	2	4	2	4
FALSE	High	Master Protein	Q9BSJ8	Extended synaptotagmin-1 OS=Homo sapiens GN=ESYT1 PE=1 SV=1	0	33.7453	10.5072	10	16	10	1	1104	122.78	5.83	2	14	2	10
FALSE	High	Master Protein	Q9Y2Z4	Tyrosine--tRNA ligase, mitochondrial OS=Homo sapiens GN=YARS2 PE=1 SV=2	0	10.7841	10.4822	4	4	4	1	477	53.166	8.98	2	2	2	2
FALSE	High	Master Protein	P35754	Glutaredoxin-1 OS=Homo sapiens GN=GLRX PE=1 SV=2	0.00542741	2.43321	10.3774	1	4	1	1	106	11.768	8.09	2	2	1	1
FALSE	High	Master Protein	Q12788	Transducin beta-like protein 3 OS=Homo sapiens GN=TBL3 PE=1 SV=2	0	16.2278	10.0248	6	7	6	1	808	88.978	6.9	2	5	2	5
FALSE	Medium	Master Protein	O95969	Secretoglobin family 1D member 2 OS=Homo sapiens GN=SCGB1D2 PE=2 SV=1	0.0125506	1.87648	10	1	2	1	1	90	9.918	8.25	2		1
FALSE	High	Master Protein	O75489	NADH dehydrogenase [ubiquinone] iron-sulfur protein 3, mitochondrial OS=Homo sapiens GN=NDUFS3 PE=1 SV=1	0	6.7481	9.84848	2	3	2	1	264	30.223	7.5	2	1	2	1
FALSE	High	Master Protein	P47897	Glutamine--tRNA ligase OS=Homo sapiens GN=QARS PE=1 SV=1	0	14.7619	9.80645	7	9	7	1	775	87.743	7.15	2	7	2	7
FALSE	High	Master Protein	Q96CN7	Isochorismatase domain-containing protein 1 OS=Homo sapiens GN=ISOC1 PE=1 SV=3	0	7.20906	9.73154	2	4	2	1	298	32.216	7.39	2	2	2	2
FALSE	High	Master Protein	Q9Y383	Putative RNA-binding protein Luc7-like 2 OS=Homo sapiens GN=LUC7L2 PE=1 SV=2	0	8.46685	9.69388	3	5	3	1	392	46.486	10.01	2	3	1	3
FALSE	High	Master Protein	P57740	Nuclear pore complex protein Nup107 OS=Homo sapiens GN=NUP107 PE=1 SV=1	0	19.0384	9.40541	7	9	7	1	925	106.307	5.43	2	7	2	6
FALSE	High	Master Protein	Q6P2H3	Centrosomal protein of 85 kDa OS=Homo sapiens GN=CEP85 PE=1 SV=1	0	18.5792	8.92388	6	8	6	1	762	85.586	6	2	6	2	6
FALSE	High	Master Protein	P28072	Proteasome subunit beta type-6 OS=Homo sapiens GN=PSMB6 PE=1 SV=4	0.000607903	4.65315	8.78661	2	3	2	1	239	25.341	4.92	2	1	2	1
FALSE	High	Master Protein	Q4VCS5	Angiomotin OS=Homo sapiens GN=AMOT PE=1 SV=1	0	21.0123	8.67159	8	11	8	1	1084	118.013	7.64	2	9	2	8
FALSE	High	Master Protein	O00178	GTP-binding protein 1 OS=Homo sapiens GN=GTPBP1 PE=1 SV=3	0	17.0299	8.66966	5	7	5	1	669	72.408	8.34	2	5	2	5
FALSE	High	Master Protein	Q8WWH5	Probable tRNA pseudouridine synthase 1 OS=Homo sapiens GN=TRUB1 PE=1 SV=1	0	6.99015	8.59599	3	6	3	1	349	37.229	8.25	2	4	1	3
FALSE	High	Master Protein	Q9Y5Y2	Cytosolic Fe-S cluster assembly factor NUBP2 OS=Homo sapiens GN=NUBP2 PE=1 SV=1	0.000607903	5.15923	8.48708	2	4	2	1	271	28.807	5.83	2	2	2	2
FALSE	High	Master Protein	Q9NSE4	Isoleucine--tRNA ligase, mitochondrial OS=Homo sapiens GN=IARS2 PE=1 SV=2	0	19.2792	7.80632	7	9	7	1	1012	113.719	7.2	2	7	2	7
FALSE	High	Master Protein	O43318	Mitogen-activated protein kinase kinase kinase 7 OS=Homo sapiens GN=MAP3K7 PE=1 SV=1	0	14.017	7.75578	5	6	5	1	606	67.153	7.11	2	4	2	3
FALSE	High	Master Protein	Q96E17	Ras-related protein Rab-3C OS=Homo sapiens GN=RAB3C PE=2 SV=1	0.00158144	3.95828	7.48899	2	5	1	1	227	25.936	5.24	2	3	1	2
FALSE	High	Master Protein	Q9Y4L1	Hypoxia up-regulated protein 1 OS=Homo sapiens GN=HYOU1 PE=1 SV=1	0	14.5529	7.20721	6	8	6	1	999	111.266	5.22	2	6	2	5
FALSE	High	Master Protein	P62899	60S ribosomal protein L31 OS=Homo sapiens GN=RPL31 PE=1 SV=1	0.00586643	2.4176	7.2	1	2	1	1	125	14.454	10.54	2		1
FALSE	High	Master Protein	P30876	DNA-directed RNA polymerase II subunit RPB2 OS=Homo sapiens GN=POLR2B PE=1 SV=1	0	21.4755	6.98467	9	11	9	1	1174	133.811	6.87	2	9	2	9
FALSE	High	Master Protein	Q13200	26S proteasome non-ATPase regulatory subunit 2 OS=Homo sapiens GN=PSMD2 PE=1 SV=3	0	16.7921	6.71806	5	7	5	1	908	100.136	5.2	2	5	2	5
FALSE	High	Master Protein	Q7L576	Cytoplasmic FMR1-interacting protein 1 OS=Homo sapiens GN=CYFIP1 PE=1 SV=1	0	19.1574	6.70391	7	13	4	1	1253	145.089	6.9	2	11	2	7
FALSE	High	Master Protein	Q3SXM5	Inactive hydroxysteroid dehydrogenase-like protein 1 OS=Homo sapiens GN=HSDL1 PE=1 SV=3	0.000607903	4.7452	6.66667	2	2	2	1	330	36.978	8.72	2		2
FALSE	High	Master Protein	P61619	Protein transport protein Sec61 subunit alpha isoform 1 OS=Homo sapiens GN=SEC61A1 PE=1 SV=2	0	8.5019	6.51261	4	7	4	1	476	52.231	8.06	2	5	2	4
FALSE	High	Master Protein	Q14152	Eukaryotic translation initiation factor 3 subunit A OS=Homo sapiens GN=EIF3A PE=1 SV=1	0	25.611	6.5123	8	15	8	1	1382	166.468	6.79	2	13	2	8
FALSE	High	Master Protein	Q15120	[Pyruvate dehydrogenase (acetyl-transferring)] kinase isozyme 3, mitochondrial OS=Homo sapiens GN=PDK3 PE=1 SV=1	0.000607903	5.23623	6.40394	2	2	2	1	406	46.909	8.37	2		2
FALSE	High	Master Protein	Q99496	E3 ubiquitin-protein ligase RING2 OS=Homo sapiens GN=RNF2 PE=1 SV=1	0.000607903	6.4646	6.25	2	6	1	1	336	37.632	6.84	2	4	2	1
FALSE	High	Master Protein	P57678	Gem-associated protein 4 OS=Homo sapiens GN=GEMIN4 PE=1 SV=2	0	16.4259	6.23819	6	6	6	1	1058	119.96	6.04	2	4	2	4
FALSE	High	Master Protein	Q9H0A0	N-acetyltransferase 10 OS=Homo sapiens GN=NAT10 PE=1 SV=2	0	11.5227	6.14634	5	6	5	1	1025	115.657	8.27	2	4	2	4
FALSE	High	Master Protein	A0FGR8	Extended synaptotagmin-2 OS=Homo sapiens GN=ESYT2 PE=1 SV=1	0	15.7229	5.97177	5	7	5	1	921	102.294	9.26	2	5	2	5
FALSE	High	Master Protein	P50750	Cyclin-dependent kinase 9 OS=Homo sapiens GN=CDK9 PE=1 SV=3	0.00202122	3.24072	5.91398	2	3	1	1	372	42.75	8.79	2	1	2	1
FALSE	High	Master Protein	Q96QA5	Gasdermin-A OS=Homo sapiens GN=GSDMA PE=1 SV=4	0.000607903	5.28033	5.8427	3	6	3	1	445	49.334	5.29	2	4	1	3
FALSE	High	Master Protein	Q9UBE0	SUMO-activating enzyme subunit 1 OS=Homo sapiens GN=SAE1 PE=1 SV=1	0.00158144	4.24746	5.78035	2	4	2	1	346	38.426	5.3	2	2	2	2
FALSE	High	Master Protein	Q92974	Rho guanine nucleotide exchange factor 2 OS=Homo sapiens GN=ARHGEF2 PE=1 SV=4	0	14.0492	5.57809	6	8	6	1	986	111.473	7.27	2	6	2	6
FALSE	High	Master Protein	Q9HCE1	Putative helicase MOV-10 OS=Homo sapiens GN=MOV10 PE=1 SV=2	0	10.8639	5.38385	6	6	6	1	1003	113.599	8.82	2	4	2	4
FALSE	Medium	Master Protein	P68431	Histone H3.1 OS=Homo sapiens GN=HIST1H3A PE=1 SV=2	0.0335821	1.47044	5.14706	1	4	1	1	136	15.394	11.12	2	2	1	1
FALSE	High	Master Protein	Q15032	R3H domain-containing protein 1 OS=Homo sapiens GN=R3HDM1 PE=1 SV=3	0	14.4409	5.09554	4	6	4	1	1099	120.621	8.75	2	4	2	4
FALSE	High	Master Protein	Q96KP4	Cytosolic non-specific dipeptidase OS=Homo sapiens GN=CNDP2 PE=1 SV=2	0.000607903	6.12173	5.05263	2	3	2	1	475	52.845	5.97	2	1	2	1
FALSE	High	Master Protein	O15294	UDP-N-acetylglucosamine--peptide N-acetylglucosaminyltransferase 110 kDa subunit OS=Homo sapiens GN=OGT PE=1 SV=3	0	10.3368	4.68451	5	6	5	1	1046	116.85	6.7	2	4	2	4
FALSE	High	Master Protein	P14625	Endoplasmin OS=Homo sapiens GN=HSP90B1 PE=1 SV=1	0	19.845	4.60772	4	10	2	1	803	92.411	4.84	2	8	2	4
FALSE	High	Master Protein	Q15386	Ubiquitin-protein ligase E3C OS=Homo sapiens GN=UBE3C PE=1 SV=3	0	11.7022	4.52447	4	6	4	1	1083	123.844	6.71	2	4	2	4
FALSE	High	Master Protein	Q14683	Structural maintenance of chromosomes protein 1A OS=Homo sapiens GN=SMC1A PE=1 SV=2	0	14.2082	4.21736	5	7	5	1	1233	143.144	7.64	2	5	2	5
FALSE	High	Master Protein	P39748	Flap endonuclease 1 OS=Homo sapiens GN=FEN1 PE=1 SV=1	0.00120192	4.3873	4.21053	2	4	2	1	380	42.566	8.62	2	2	2	2
FALSE	High	Master Protein	Q9Y6M1	Insulin-like growth factor 2 mRNA-binding protein 2 OS=Homo sapiens GN=IGF2BP2 PE=1 SV=2	0	9.89674	4.17362	2	7	1	1	599	66.081	8.46	2	5	1	2
FALSE	High	Master Protein	Q99700	Ataxin-2 OS=Homo sapiens GN=ATXN2 PE=1 SV=2	0	9.26069	4.11272	4	6	4	1	1313	140.196	9.57	2	4	2	4
FALSE	High	Master Protein	O43795	Unconventional myosin-Ib OS=Homo sapiens GN=MYO1B PE=1 SV=3	0	9.89426	3.78521	4	6	4	1	1136	131.902	9.38	2	4	2	4
FALSE	High	Master Protein	Q8WVV4	Protein POF1B OS=Homo sapiens GN=POF1B PE=1 SV=3	0.000607903	5.35482	3.56537	2	5	2	1	589	68.022	6.32	2	3	1	2
FALSE	High	Master Protein	Q12769	Nuclear pore complex protein Nup160 OS=Homo sapiens GN=NUP160 PE=1 SV=3	0	11.818	3.48189	5	7	5	1	1436	162.017	5.5	2	5	2	5
FALSE	High	Master Protein	P52701	DNA mismatch repair protein Msh6 OS=Homo sapiens GN=MSH6 PE=1 SV=2	0	9.6929	3.08824	4	6	4	1	1360	152.689	6.9	2	4	2	4
FALSE	High	Master Protein	O60341	Lysine-specific histone demethylase 1A OS=Homo sapiens GN=KDM1A PE=1 SV=2	0.000607903	5.94047	2.93427	2	4	2	1	852	92.845	6.52	2	2	2	2
FALSE	High	Master Protein	Q9HCM7	Fibrosin-1-like protein OS=Homo sapiens GN=FBRSL1 PE=1 SV=4	0.000607903	4.71299	2.87081	2	4	2	1	1045	110.839	9.67	2	2	2	2
FALSE	High	Master Protein	Q6NUQ4	Transmembrane protein 214 OS=Homo sapiens GN=TMEM214 PE=1 SV=2	0.00991736	1.9897	2.61248	1	3	1	1	689	77.101	9.14	2	1	1	1
FALSE	High	Master Protein	Q16610	Extracellular matrix protein 1 OS=Homo sapiens GN=ECM1 PE=1 SV=2	0.00456413	2.56912	2.40741	1	4	1	1	540	60.635	6.71	2	2	1	1
FALSE	High	Master Protein	Q9Y4W6	AFG3-like protein 2 OS=Homo sapiens GN=AFG3L2 PE=1 SV=2	0.000607903	6.12916	2.38394	2	3	2	1	797	88.528	8.66	2	1	2	1
FALSE	High	Master Protein	O00443	Phosphatidylinositol 4-phosphate 3-kinase C2 domain-containing subunit alpha OS=Homo sapiens GN=PIK3C2A PE=1 SV=2	0	7.56803	2.25386	3	4	3	1	1686	190.559	8.02	2	2	2	2
FALSE	High	Master Protein	Q6W2J9	BCL-6 corepressor OS=Homo sapiens GN=BCOR PE=1 SV=1	0	6.74113	2.22222	3	4	3	1	1755	192.069	6.48	2	2	2	2
FALSE	High	Master Protein	Q14687	Genetic suppressor element 1 OS=Homo sapiens GN=GSE1 PE=1 SV=3	0.000607903	4.73949	2.1364	2	4	2	1	1217	136.081	7.74	2	2	2	2
FALSE	High	Master Protein	Q8N3C0	Activating signal cointegrator 1 complex subunit 3 OS=Homo sapiens GN=ASCC3 PE=1 SV=3	0	8.98785	2.13442	4	5	4	1	2202	251.301	7.09	2	3	2	3
FALSE	High	Master Protein	P11166	Solute carrier family 2, facilitated glucose transporter member 1 OS=Homo sapiens GN=SLC2A1 PE=1 SV=2	0.00202122	3.23508	2.03252	1	3	1	1	492	54.049	8.72	2	1	1	1
FALSE	High	Master Protein	Q9NQ38	Serine protease inhibitor Kazal-type 5 OS=Homo sapiens GN=SPINK5 PE=1 SV=2	0.00202122	3.33027	1.97368	2	2	2	1	1064	120.637	8.06	2		2
FALSE	High	Master Protein	Q8IY81	pre-rRNA processing protein FTSJ3 OS=Homo sapiens GN=FTSJ3 PE=1 SV=2	0.00158144	3.80101	1.88902	2	4	2	1	847	96.499	8.4	2	2	1	2
FALSE	Medium	Master Protein	Q09666	Neuroblast differentiation-associated protein AHNAK OS=Homo sapiens GN=AHNAK PE=1 SV=2	0.0330454	1.5021	1.68081	1	2	1	1	5890	628.699	6.15	2		1
FALSE	High	Master Protein	P10071	Transcriptional activator GLI3 OS=Homo sapiens GN=GLI3 PE=1 SV=6	0.000607903	5.09019	1.51899	2	3	2	1	1580	169.757	7.4	2	1	2	1
FALSE	High	Master Protein	Q9Y618	Nuclear receptor corepressor 2 OS=Homo sapiens GN=NCOR2 PE=1 SV=2	0.000607903	6.09903	1.38614	3	3	3	1	2525	274.635	7.59	2	1	2	1
FALSE	Medium	Master Protein	Q96AX1	Vacuolar protein sorting-associated protein 33A OS=Homo sapiens GN=VPS33A PE=1 SV=1	0.0311796	1.51756	1.1745	1	3	1	1	596	67.568	6.96	2	1	1	1
FALSE	High	Master Protein	Q14839	Chromodomain-helicase-DNA-binding protein 4 OS=Homo sapiens GN=CHD4 PE=1 SV=2	0.000607903	5.82551	1.09833	2	4	2	1	1912	217.867	5.86	2	2	2	2
FALSE	High	Master Protein	Q14690	Protein RRP5 homolog OS=Homo sapiens GN=PDCD11 PE=1 SV=3	0.00158144	3.94568	1.06895	2	3	2	1	1871	208.57	8.87	2	1	2	1
FALSE	Medium	Master Protein	O14559	Rho GTPase-activating protein 33 OS=Homo sapiens GN=ARHGAP33 PE=1 SV=2	0.0378676	1.42067	0.777001	1	4	1	1	1287	137.128	8.75	2	2	1	1
FALSE	High	Master Protein	Q8NCM8	Cytoplasmic dynein 2 heavy chain 1 OS=Homo sapiens GN=DYNC2H1 PE=1 SV=4	0.000607903	5.91858	0.766195	3	3	3	1	4307	492.311	6.54	2	1	2	1
FALSE	High	Master Protein	Q9UPN3	Microtubule-actin cross-linking factor 1, isoforms 1/2/3/5 OS=Homo sapiens GN=MACF1 PE=1 SV=4	0.000607903	4.71417	0.29778	3	5	2	1	7388	837.787	5.39	2	3	1	3
FALSE	High	Master Protein	Q15181	Inorganic pyrophosphatase OS=Homo sapiens GN=PPA1 PE=1 SV=2	0	47.1453	46.3668	11	15	11	1	289	32.639	5.86	1	14	1	11
FALSE	High	Master Protein	P52907	F-actin-capping protein subunit alpha-1 OS=Homo sapiens GN=CAPZA1 PE=1 SV=3	0	35.5104	41.2587	7	14	6	1	286	32.902	5.69	1	13	1	7
FALSE	High	Master Protein	P09972	Fructose-bisphosphate aldolase C OS=Homo sapiens GN=ALDOC PE=1 SV=2	0	81.8194	38.7363	13	38	9	1	364	39.431	6.87	1	37	1	13
FALSE	High	Master Protein	Q96FW1	Ubiquitin thioesterase OTUB1 OS=Homo sapiens GN=OTUB1 PE=1 SV=2	0	31.9156	37.6384	9	12	9	1	271	31.264	4.94	1	11	1	9
FALSE	High	Master Protein	P06753	Tropomyosin alpha-3 chain OS=Homo sapiens GN=TPM3 PE=1 SV=2	0	45.046	36.8421	12	17	5	1	285	32.93	4.72	1	16	1	12
FALSE	High	Master Protein	P04183	Thymidine kinase, cytosolic OS=Homo sapiens GN=TK1 PE=1 SV=2	0	22.6324	35.4701	7	10	7	1	234	25.452	8.51	1	9	1	7
FALSE	High	Master Protein	Q15019	Septin-2 OS=Homo sapiens GN=SEPT2 PE=1 SV=1	0	34.2972	32.964	11	12	11	1	361	41.461	6.6	1	11	1	11
FALSE	High	Master Protein	O43684	Mitotic checkpoint protein BUB3 OS=Homo sapiens GN=BUB3 PE=1 SV=1	0	26.2846	32.3171	10	13	10	1	328	37.131	6.84	1	12	1	10
FALSE	High	Master Protein	P67936	Tropomyosin alpha-4 chain OS=Homo sapiens GN=TPM4 PE=1 SV=3	0	31.5935	32.2581	8	12	1	1	248	28.504	4.69	1	11	1	8
FALSE	High	Master Protein	P63104	14-3-3 protein zeta/delta OS=Homo sapiens GN=YWHAZ PE=1 SV=1	0	21.3865	31.8367	7	10	4	1	245	27.728	4.79	1	9	1	7
FALSE	High	Master Protein	Q12904	Aminoacyl tRNA synthase complex-interacting multifunctional protein 1 OS=Homo sapiens GN=AIMP1 PE=1 SV=2	0	14.438	31.7308	6	7	6	1	312	34.331	8.43	1	6	1	6
FALSE	High	Master Protein	P11802	Cyclin-dependent kinase 4 OS=Homo sapiens GN=CDK4 PE=1 SV=2	0	25.4556	31.6832	7	9	6	1	303	33.708	7.01	1	8	1	7
FALSE	High	Master Protein	P31946	14-3-3 protein beta/alpha OS=Homo sapiens GN=YWHAB PE=1 SV=3	0	25.8158	30.8943	8	12	3	1	246	28.065	4.83	1	11	1	8
FALSE	High	Master Protein	Q15555	Microtubule-associated protein RP/EB family member 2 OS=Homo sapiens GN=MAPRE2 PE=1 SV=1	0	34.3123	30.8869	8	13	8	1	327	37.008	5.57	1	12	1	8
FALSE	High	Master Protein	P12268	Inosine-5'-monophosphate dehydrogenase 2 OS=Homo sapiens GN=IMPDH2 PE=1 SV=2	0	48.8691	30.5447	13	22	13	1	514	55.77	6.9	1	21	1	13
FALSE	High	Master Protein	Q92598	Heat shock protein 105 kDa OS=Homo sapiens GN=HSPH1 PE=1 SV=1	0	89.384	29.8368	23	36	20	1	858	96.804	5.39	1	35	1	23
FALSE	High	Master Protein	O14828	Secretory carrier-associated membrane protein 3 OS=Homo sapiens GN=SCAMP3 PE=1 SV=3	0	47.1835	29.3948	8	16	8	1	347	38.262	7.64	1	15	1	8
FALSE	High	Master Protein	P30520	Adenylosuccinate synthetase isozyme 2 OS=Homo sapiens GN=ADSS PE=1 SV=3	0	33.4311	27.8509	10	14	10	1	456	50.066	6.55	1	13	1	10
FALSE	High	Master Protein	P62280	40S ribosomal protein S11 OS=Homo sapiens GN=RPS11 PE=1 SV=3	0	11.2601	27.8481	4	5	4	1	158	18.419	10.3	1	4	1	4
FALSE	High	Master Protein	P28482	Mitogen-activated protein kinase 1 OS=Homo sapiens GN=MAPK1 PE=1 SV=3	0	31.9904	26.3889	8	15	8	1	360	41.363	6.98	1	14	1	8
FALSE	High	Master Protein	P20618	Proteasome subunit beta type-1 OS=Homo sapiens GN=PSMB1 PE=1 SV=2	0	10.8608	26.1411	5	6	5	1	241	26.472	8.13	1	5	1	5
FALSE	High	Master Protein	P41240	Tyrosine-protein kinase CSK OS=Homo sapiens GN=CSK PE=1 SV=1	0	38.5804	25.7778	11	14	11	1	450	50.672	7.06	1	13	1	11
FALSE	High	Master Protein	P62333	26S protease regulatory subunit 10B OS=Homo sapiens GN=PSMC6 PE=1 SV=1	0	22.7998	25.4499	8	9	8	1	389	44.145	7.49	1	8	1	8
FALSE	High	Master Protein	P32322	Pyrroline-5-carboxylate reductase 1, mitochondrial OS=Homo sapiens GN=PYCR1 PE=1 SV=2	0	16.661	25.0784	6	8	5	1	319	33.34	7.61	1	7	1	6
FALSE	High	Master Protein	Q9HCY8	Protein S100-A14 OS=Homo sapiens GN=S100A14 PE=1 SV=1	0.000607903	5.5718	25	2	2	2	1	104	11.655	5.24	1	1	1	1
FALSE	High	Master Protein	P35998	26S protease regulatory subunit 7 OS=Homo sapiens GN=PSMC2 PE=1 SV=3	0	29.7513	24.9423	11	12	11	1	433	48.603	5.95	1	11	1	11
FALSE	High	Master Protein	O43813	LanC-like protein 1 OS=Homo sapiens GN=LANCL1 PE=1 SV=1	0	22.6352	24.0602	8	9	8	1	399	45.254	7.75	1	8	1	8
FALSE	High	Master Protein	Q92530	Proteasome inhibitor PI31 subunit OS=Homo sapiens GN=PSMF1 PE=1 SV=2	0	23.4001	23.9852	5	8	5	1	271	29.798	5.74	1	7	1	5
FALSE	High	Master Protein	P18621	60S ribosomal protein L17 OS=Homo sapiens GN=RPL17 PE=1 SV=3	0	15.6974	22.8261	6	8	6	1	184	21.383	10.17	1	7	1	6
FALSE	High	Master Protein	P62195	26S protease regulatory subunit 8 OS=Homo sapiens GN=PSMC5 PE=1 SV=1	0	18.5991	22.6601	7	7	6	1	406	45.597	7.55	1	6	1	6
FALSE	High	Master Protein	P48047	ATP synthase subunit O, mitochondrial OS=Homo sapiens GN=ATP5O PE=1 SV=1	0	10.432	22.5352	4	5	4	1	213	23.263	9.96	1	4	1	4
FALSE	High	Master Protein	P52209	6-phosphogluconate dehydrogenase, decarboxylating OS=Homo sapiens GN=PGD PE=1 SV=3	0	45.7248	22.3602	11	18	11	1	483	53.106	7.23	1	17	1	11
FALSE	High	Master Protein	P53396	ATP-citrate synthase OS=Homo sapiens GN=ACLY PE=1 SV=3	0	66.37	21.98	21	25	21	1	1101	120.762	7.33	1	24	1	21
FALSE	High	Master Protein	P20339	Ras-related protein Rab-5A OS=Homo sapiens GN=RAB5A PE=1 SV=2	0	10.9932	21.8605	4	5	2	1	215	23.644	8.15	1	4	1	4
FALSE	High	Master Protein	P61981	14-3-3 protein gamma OS=Homo sapiens GN=YWHAG PE=1 SV=2	0	16.2246	21.4575	6	9	2	1	247	28.285	4.89	1	8	1	6
FALSE	High	Master Protein	Q96H79	Zinc finger CCCH-type antiviral protein 1-like OS=Homo sapiens GN=ZC3HAV1L PE=1 SV=2	0	20.7144	21.3333	5	11	5	1	300	32.94	8.13	1	10	1	5
FALSE	High	Master Protein	P49915	GMP synthase [glutamine-hydrolyzing] OS=Homo sapiens GN=GMPS PE=1 SV=1	0	31.7541	21.2121	11	14	11	1	693	76.667	6.87	1	13	1	11
FALSE	High	Master Protein	Q04917	14-3-3 protein eta OS=Homo sapiens GN=YWHAH PE=1 SV=4	0	15.4846	21.1382	6	9	3	1	246	28.201	4.84	1	8	1	6
FALSE	High	Master Protein	O60547	GDP-mannose 4,6 dehydratase OS=Homo sapiens GN=GMDS PE=1 SV=1	0	14.6889	20.9677	6	6	6	1	372	41.923	7.31	1	5	1	5
FALSE	High	Master Protein	Q15631	Translin OS=Homo sapiens GN=TSN PE=1 SV=1	0	14.491	20.614	4	6	4	1	228	26.167	6.44	1	5	1	4
FALSE	High	Master Protein	P12956	X-ray repair cross-complementing protein 6 OS=Homo sapiens GN=XRCC6 PE=1 SV=2	0	34.5853	20.197	10	19	10	1	609	69.799	6.64	1	18	1	10
FALSE	High	Master Protein	Q9NSD9	Phenylalanine--tRNA ligase beta subunit OS=Homo sapiens GN=FARSB PE=1 SV=3	0	29.7806	20.034	11	13	11	1	589	66.074	6.84	1	12	1	11
FALSE	High	Master Protein	P43897	Elongation factor Ts, mitochondrial OS=Homo sapiens GN=TSFM PE=1 SV=2	0	12.8237	20	4	5	4	1	325	35.368	8.38	1	4	1	4
FALSE	High	Master Protein	Q9NUU7	ATP-dependent RNA helicase DDX19A OS=Homo sapiens GN=DDX19A PE=1 SV=1	0	23.7096	19.4561	8	10	8	1	478	53.941	6.58	1	9	1	8
FALSE	High	Master Protein	P31689	DnaJ homolog subfamily A member 1 OS=Homo sapiens GN=DNAJA1 PE=1 SV=2	0	20.223	19.3955	7	16	7	1	397	44.839	7.08	1	15	1	7
FALSE	High	Master Protein	Q13347	Eukaryotic translation initiation factor 3 subunit I OS=Homo sapiens GN=EIF3I PE=1 SV=1	0	21.949	18.7692	7	10	7	1	325	36.479	5.64	1	9	1	7
FALSE	High	Master Protein	P53004	Biliverdin reductase A OS=Homo sapiens GN=BLVRA PE=1 SV=2	0	13.2957	18.5811	5	5	5	1	296	33.407	6.44	1	4	1	4
FALSE	High	Master Protein	Q13492	Phosphatidylinositol-binding clathrin assembly protein OS=Homo sapiens GN=PICALM PE=1 SV=2	0	27.6485	17.7914	10	15	10	1	652	70.71	7.9	1	14	1	10
FALSE	High	Master Protein	Q96D46	60S ribosomal export protein NMD3 OS=Homo sapiens GN=NMD3 PE=1 SV=1	0	17.0858	17.6938	6	7	6	1	503	57.566	7.14	1	6	1	6
FALSE	High	Master Protein	O94903	Proline synthase co-transcribed bacterial homolog protein OS=Homo sapiens GN=PROSC PE=1 SV=1	0	12.5929	17.0909	4	5	4	1	275	30.325	7.5	1	4	1	4
FALSE	High	Master Protein	P49593	Protein phosphatase 1F OS=Homo sapiens GN=PPM1F PE=1 SV=3	0	14.5089	16.9604	5	8	5	1	454	49.8	5.1	1	7	1	5
FALSE	High	Master Protein	P69905	Hemoglobin subunit alpha OS=Homo sapiens GN=HBA1 PE=1 SV=2	0.000607903	5.03121	16.9014	2	3	2	1	142	15.248	8.68	1	2	1	2
FALSE	High	Master Protein	Q9NQG5	Regulation of nuclear pre-mRNA domain-containing protein 1B OS=Homo sapiens GN=RPRD1B PE=1 SV=1	0	12.569	16.8712	4	5	4	1	326	36.877	5.97	1	4	1	4
FALSE	High	Master Protein	P29401	Transketolase OS=Homo sapiens GN=TKT PE=1 SV=3	0	28.8637	16.8539	9	12	9	1	623	67.835	7.66	1	11	1	9
FALSE	High	Master Protein	P30533	Alpha-2-macroglobulin receptor-associated protein OS=Homo sapiens GN=LRPAP1 PE=1 SV=1	0	11.1791	16.8067	4	5	4	1	357	41.441	8.78	1	4	1	3
FALSE	High	Master Protein	Q01081	Splicing factor U2AF 35 kDa subunit OS=Homo sapiens GN=U2AF1 PE=1 SV=3	0	10.0964	16.6667	3	6	3	1	240	27.854	8.81	1	5	1	3
FALSE	High	Master Protein	P49841	Glycogen synthase kinase-3 beta OS=Homo sapiens GN=GSK3B PE=1 SV=2	0	12.6631	16.6667	5	8	4	1	420	46.715	8.78	1	7	1	5
FALSE	High	Master Protein	P05198	Eukaryotic translation initiation factor 2 subunit 1 OS=Homo sapiens GN=EIF2S1 PE=1 SV=3	0	14.3111	16.5079	5	6	5	1	315	36.089	5.08	1	5	1	5
FALSE	High	Master Protein	Q02750	Dual specificity mitogen-activated protein kinase kinase 1 OS=Homo sapiens GN=MAP2K1 PE=1 SV=2	0	12.6666	16.285	6	6	5	1	393	43.411	6.62	1	5	1	5
FALSE	High	Master Protein	P61020	Ras-related protein Rab-5B OS=Homo sapiens GN=RAB5B PE=1 SV=1	0	10.2962	16.2791	3	4	1	1	215	23.692	8.13	1	3	1	3
FALSE	High	Master Protein	Q9NS86	LanC-like protein 2 OS=Homo sapiens GN=LANCL2 PE=1 SV=1	0	21.7738	16.2222	6	7	6	1	450	50.821	7.43	1	6	1	6
FALSE	High	Master Protein	P20042	Eukaryotic translation initiation factor 2 subunit 2 OS=Homo sapiens GN=EIF2S2 PE=1 SV=2	0	16.9617	16.2162	6	7	6	1	333	38.364	5.8	1	6	1	6
FALSE	High	Master Protein	O14818	Proteasome subunit alpha type-7 OS=Homo sapiens GN=PSMA7 PE=1 SV=1	0	9.692	16.129	3	5	3	1	248	27.87	8.46	1	4	1	3
FALSE	High	Master Protein	Q5T6V5	UPF0553 protein C9orf64 OS=Homo sapiens GN=C9orf64 PE=1 SV=1	0	11.5343	16.129	5	6	5	1	341	39.004	5.88	1	5	1	5
FALSE	High	Master Protein	O60749	Sorting nexin-2 OS=Homo sapiens GN=SNX2 PE=1 SV=2	0	19.0626	15.6069	7	8	6	1	519	58.435	5.12	1	7	1	7
FALSE	High	Master Protein	Q92597	Protein NDRG1 OS=Homo sapiens GN=NDRG1 PE=1 SV=1	0	24.1739	15.4822	4	8	4	1	394	42.808	5.82	1	7	1	4
FALSE	High	Master Protein	P11216	Glycogen phosphorylase, brain form OS=Homo sapiens GN=PYGB PE=1 SV=5	0	37.3161	15.1839	12	17	8	1	843	96.635	6.86	1	16	1	12
FALSE	High	Master Protein	Q96AE4	Far upstream element-binding protein 1 OS=Homo sapiens GN=FUBP1 PE=1 SV=3	0	25.6141	15.0621	8	17	6	1	644	67.518	7.61	1	16	1	8
FALSE	High	Master Protein	Q9BTE6	Alanyl-tRNA editing protein Aarsd1 OS=Homo sapiens GN=AARSD1 PE=1 SV=2	0	12.3402	14.8058	5	6	5	1	412	45.451	6.42	1	5	1	5
FALSE	High	Master Protein	Q99714	3-hydroxyacyl-CoA dehydrogenase type-2 OS=Homo sapiens GN=HSD17B10 PE=1 SV=3	0.000607903	6.2173	14.5594	2	2	2	1	261	26.906	7.78	1	1	1	1
FALSE	High	Master Protein	P26368	Splicing factor U2AF 65 kDa subunit OS=Homo sapiens GN=U2AF2 PE=1 SV=4	0	14.1222	14.5263	6	7	6	1	475	53.467	9.09	1	6	1	6
FALSE	High	Master Protein	Q9UKD2	mRNA turnover protein 4 homolog OS=Homo sapiens GN=MRTO4 PE=1 SV=2	0.00158144	4.2914	14.2259	2	2	2	1	239	27.543	8.29	1	1	1	1
FALSE	High	Master Protein	P43686	26S protease regulatory subunit 6B OS=Homo sapiens GN=PSMC4 PE=1 SV=2	0	15.7488	14.1148	6	7	6	1	418	47.337	5.21	1	6	1	6
FALSE	High	Master Protein	Q14232	Translation initiation factor eIF-2B subunit alpha OS=Homo sapiens GN=EIF2B1 PE=1 SV=1	0	12.9198	14.0984	4	5	4	1	305	33.691	7.33	1	4	1	4
FALSE	High	Master Protein	B9A064	Immunoglobulin lambda-like polypeptide 5 OS=Homo sapiens GN=IGLL5 PE=2 SV=2	0.000607903	5.51046	14.0187	2	2	2	1	214	23.049	8.84	1	1	1	1
FALSE	High	Master Protein	P35237	Serpin B6 OS=Homo sapiens GN=SERPINB6 PE=1 SV=3	0	13.9181	13.8298	4	4	4	1	376	42.594	5.27	1	3	1	3
FALSE	High	Master Protein	Q04637	Eukaryotic translation initiation factor 4 gamma 1 OS=Homo sapiens GN=EIF4G1 PE=1 SV=4	0	51.9446	13.8211	16	21	16	1	1599	175.382	5.33	1	20	1	16
FALSE	High	Master Protein	Q9NQ88	Fructose-2,6-bisphosphatase TIGAR OS=Homo sapiens GN=TIGAR PE=1 SV=1	0	8.69814	13.7037	3	4	3	1	270	30.043	7.69	1	3	1	3
FALSE	High	Master Protein	Q8WUA2	Peptidyl-prolyl cis-trans isomerase-like 4 OS=Homo sapiens GN=PPIL4 PE=1 SV=1	0	27.3035	13.6179	6	10	6	1	492	57.189	5.92	1	9	1	6
FALSE	High	Master Protein	O95299	NADH dehydrogenase [ubiquinone] 1 alpha subcomplex subunit 10, mitochondrial OS=Homo sapiens GN=NDUFA10 PE=1 SV=1	0	13.1368	13.5211	4	5	4	1	355	40.725	8.48	1	4	1	4
FALSE	High	Master Protein	Q92572	AP-3 complex subunit sigma-1 OS=Homo sapiens GN=AP3S1 PE=1 SV=1	0.000607903	5.06753	13.4715	2	3	2	1	193	21.718	5.39	1	2	1	2
FALSE	High	Master Protein	P08195	4F2 cell-surface antigen heavy chain OS=Homo sapiens GN=SLC3A2 PE=1 SV=3	0	17.0733	13.0159	6	13	6	1	630	67.952	5.01	1	12	1	6
FALSE	High	Master Protein	O00165	HCLS1-associated protein X-1 OS=Homo sapiens GN=HAX1 PE=1 SV=2	0	6.90103	12.9032	2	3	2	1	279	31.601	4.92	1	2	1	2
FALSE	High	Master Protein	Q3MHD2	Protein LSM12 homolog OS=Homo sapiens GN=LSM12 PE=1 SV=2	0	11.4562	12.8205	3	4	3	1	195	21.687	7.74	1	3	1	3
FALSE	High	Master Protein	Q9NRG9	Aladin OS=Homo sapiens GN=AAAS PE=1 SV=1	0	17.3869	12.6374	6	7	6	1	546	59.536	7.5	1	6	1	6
FALSE	High	Master Protein	P30101	Protein disulfide-isomerase A3 OS=Homo sapiens GN=PDIA3 PE=1 SV=4	0	15.6126	12.4752	5	6	5	1	505	56.747	6.35	1	5	1	5
FALSE	High	Master Protein	P24534	Elongation factor 1-beta OS=Homo sapiens GN=EEF1B2 PE=1 SV=3	0	9.55548	12.4444	2	4	2	1	225	24.748	4.67	1	3	1	2
FALSE	High	Master Protein	Q9BYE4	Small proline-rich protein 2G OS=Homo sapiens GN=SPRR2G PE=3 SV=1	0.00376294	2.75523	12.3288	1	2	1	1	73	8.152	7.96	1	1	1	1
FALSE	High	Master Protein	P61964	WD repeat-containing protein 5 OS=Homo sapiens GN=WDR5 PE=1 SV=1	0	8.24824	12.2754	3	5	3	1	334	36.565	8.27	1	4	1	3
FALSE	High	Master Protein	P30740	Leukocyte elastase inhibitor OS=Homo sapiens GN=SERPINB1 PE=1 SV=1	0	7.56897	11.8734	3	3	3	1	379	42.715	6.28	1	2	1	2
FALSE	High	Master Protein	P33176	Kinesin-1 heavy chain OS=Homo sapiens GN=KIF5B PE=1 SV=1	0	23.7164	11.838	9	10	9	1	963	109.617	6.51	1	9	1	9
FALSE	High	Master Protein	Q15637	Splicing factor 1 OS=Homo sapiens GN=SF1 PE=1 SV=4	0	17.7204	11.7371	7	13	7	1	639	68.286	8.98	1	12	1	7
FALSE	High	Master Protein	Q969V3	Nicalin OS=Homo sapiens GN=NCLN PE=1 SV=2	0	18.3022	11.7229	6	8	6	1	563	62.935	6.89	1	7	1	6
FALSE	High	Master Protein	O00442	RNA 3'-terminal phosphate cyclase OS=Homo sapiens GN=RTCA PE=1 SV=1	0	11.9814	11.4754	4	5	4	1	366	39.311	7.85	1	4	1	4
FALSE	High	Master Protein	P16104	Histone H2AX OS=Homo sapiens GN=H2AFX PE=1 SV=2	0.000607903	4.7915	11.1888	2	3	2	1	143	15.135	10.74	1	2	1	2
[truncated: 219 more rows]
