# Supplementary material for: α-/γ-Taxilin are required for centriolar subdistal appendage assembly and microtubule organization
Source: eLife journal article supplement (doi:10.7554/elife.73252), 2022-01-19
Supplement: fig1-figsupp1-data2 [file MDD_20180202_120_C AND T_.xlsx]

## Sheet: Proteins
Checked	Protein FDR Confidence	Master	Accession	Description	Exp. q-value	Sum PEP Score	Coverage	# Peptides	# PSMs	# Unique Peptides	# Protein Groups	# AAs	MW [kDa]	calc. pI	# PSMs A2 Sequest HT Ctrl	# PSMs B2 Sequest HT	有coiled-coil domain
FALSE	High	Master Protein	Q6YHK3	CD109 antigen OS=Homo sapiens GN=CD109 PE=1 SV=2	0	104.773	18.1315	21	30	21	1	1445	161.587	5.85		30	有WD repeat
FALSE	High	Master Protein	P05187	Alkaline phosphatase, placental type OS=Homo sapiens GN=ALPP PE=1 SV=2	0	109.099	41.6822	17	28	17	1	535	57.917	6.29		28	报道与骨架/中心体/纺锤体/中心体等有关
FALSE	High	Master Protein	Q14126	Desmoglein-2 OS=Homo sapiens GN=DSG2 PE=1 SV=2	0	94.4241	19.1413	14	25	14	1	1118	122.218	5.24		25
FALSE	High	Master Protein	O75044	SLIT-ROBO Rho GTPase-activating protein 2 OS=Homo sapiens GN=SRGAP2 PE=1 SV=2	0	46.5118	15.2194	14	15	14	1	1071	120.805	6.7		15
FALSE	High	Master Protein	Q69YQ0	Cytospin-A OS=Homo sapiens GN=SPECC1L PE=1 SV=2	0	38.1958	11.9069	10	13	10	1	1117	124.525	5.72		13
FALSE	High	Master Protein	Q76I76	Protein phosphatase Slingshot homolog 2 OS=Homo sapiens GN=SSH2 PE=1 SV=1	0	27.4554	7.51933	9	11	9	1	1423	158.116	5.41		11
FALSE	High	Master Protein	Q96II8	Leucine-rich repeat and calponin homology domain-containing protein 3 OS=Homo sapiens GN=LRCH3 PE=1 SV=2	0	22.9945	8.62291	6	11	6	1	777	86.03	6.71		11
FALSE	High	Master Protein	Q14331	Protein FRG1 OS=Homo sapiens GN=FRG1 PE=1 SV=1	0	39.4652	25.969	9	10	9	1	258	29.154	9.01		10
FALSE	High	Master Protein	P21589	5'-nucleotidase OS=Homo sapiens GN=NT5E PE=1 SV=1	0	36.8817	16.7247	8	10	8	1	574	63.327	7.03		10
FALSE	High	Master Protein	P28289	Tropomodulin-1 OS=Homo sapiens GN=TMOD1 PE=1 SV=1	0	35.4657	23.3983	7	10	6	1	359	40.544	5.1		10
FALSE	High	Master Protein	Q9UGY1	Nucleolar protein 12 OS=Homo sapiens GN=NOL12 PE=1 SV=1	0	29.0008	38.9671	9	10	9	1	213	24.648	10.23		10
FALSE	High	Master Protein	O14639	Actin-binding LIM protein 1 OS=Homo sapiens GN=ABLIM1 PE=1 SV=3	0	26.8112	12.4679	7	10	7	1	778	87.631	8.59		10
FALSE	High	Master Protein	O75128	Protein cordon-bleu OS=Homo sapiens GN=COBL PE=1 SV=2	0	36.1098	8.08882	8	9	8	1	1261	135.533	7.75		9
FALSE	High	Master Protein	P78524	Suppression of tumorigenicity 5 protein OS=Homo sapiens GN=ST5 PE=1 SV=3	0	31.3977	7.65172	6	9	6	1	1137	126.405	9.25		9
FALSE	High	Master Protein	Q49A26	Putative oxidoreductase GLYR1 OS=Homo sapiens GN=GLYR1 PE=1 SV=3	0	30.7564	17.3599	8	9	8	1	553	60.518	9.17		9
FALSE	High	Master Protein	Q0JRZ9	F-BAR domain only protein 2 OS=Homo sapiens GN=FCHO2 PE=1 SV=2	0	34.6737	12.716	7	8	7	1	810	88.869	6.86		8
FALSE	High	Master Protein	O43293	Death-associated protein kinase 3 OS=Homo sapiens GN=DAPK3 PE=1 SV=1	0	28.6026	15.4185	8	8	8	1	454	52.503	6.89		8
FALSE	High	Master Protein	Q13601	KRR1 small subunit processome component homolog OS=Homo sapiens GN=KRR1 PE=1 SV=4	0	26.5205	14.6982	7	8	7	1	381	43.638	9.77		8
FALSE	High	Master Protein	Q5VWQ0	Round spermatid basic protein 1 OS=Homo sapiens GN=RSBN1 PE=1 SV=2	0	30.9764	7.98005	6	7	5	1	802	90.015	8.6		7
FALSE	High	Master Protein	Q86XJ1	GAS2-like protein 3 OS=Homo sapiens GN=GAS2L3 PE=1 SV=1	0	27.1774	10.951	6	7	6	1	694	75.167	9.63		7
FALSE	High	Master Protein	Q9H147	Deoxynucleotidyltransferase terminal-interacting protein 1 OS=Homo sapiens GN=DNTTIP1 PE=1 SV=2	0	23.7561	20.6687	6	7	6	1	329	36.99	8.97		7
FALSE	High	Master Protein	P42566	Epidermal growth factor receptor substrate 15 OS=Homo sapiens GN=EPS15 PE=1 SV=2	0	23.1236	5.80357	6	7	6	1	896	98.595	4.64		7
FALSE	High	Master Protein	Q13206	Probable ATP-dependent RNA helicase DDX10 OS=Homo sapiens GN=DDX10 PE=1 SV=2	0	20.6039	8.11429	7	7	7	1	875	100.825	8.63		7
FALSE	High	Master Protein	P62841	40S ribosomal protein S15 OS=Homo sapiens GN=RPS15 PE=1 SV=2	0	13.9951	21.3793	2	7	2	1	145	17.029	10.39		7
FALSE	High	Master Protein	Q10589	Bone marrow stromal antigen 2 OS=Homo sapiens GN=BST2 PE=1 SV=1	0.000761905	5.70944	10	2	7	2	1	180	19.756	5.6		7
FALSE	High	Master Protein	Q9P0V3	SH3 domain-binding protein 4 OS=Homo sapiens GN=SH3BP4 PE=1 SV=1	0	29.3243	6.85358	5	6	5	1	963	107.428	7.71		6
FALSE	High	Master Protein	Q9Y6I3	Epsin-1 OS=Homo sapiens GN=EPN1 PE=1 SV=2	0	29.002	13.1944	5	6	5	1	576	60.256	4.83		6
FALSE	High	Master Protein	Q5JTW2	Centrosomal protein of 78 kDa OS=Homo sapiens GN=CEP78 PE=1 SV=1	0	25.9441	13.9332	6	6	6	1	689	76.348	8.18		6
FALSE	High	Master Protein	P62910	60S ribosomal protein L32 OS=Homo sapiens GN=RPL32 PE=1 SV=2	0	20.6305	22.963	4	6	4	1	135	15.85	11.33		6
FALSE	High	Master Protein	A1L390	Pleckstrin homology domain-containing family G member 3 OS=Homo sapiens GN=PLEKHG3 PE=1 SV=1	0	19.2064	6.31665	6	6	6	1	1219	134.329	6.55		6
FALSE	High	Master Protein	Q53HL2	Borealin OS=Homo sapiens GN=CDCA8 PE=1 SV=2	0	18.2488	16.7857	4	6	4	1	280	31.304	9.86		6
FALSE	High	Master Protein	Q9P2E5	Chondroitin sulfate glucuronyltransferase OS=Homo sapiens GN=CHPF2 PE=2 SV=2	0	17.8381	7.38342	6	6	6	1	772	85.894	7.83		6
FALSE	High	Master Protein	Q8IUD2	ELKS/Rab6-interacting/CAST family member 1 OS=Homo sapiens GN=ERC1 PE=1 SV=1	0	16.253	5.19713	6	6	6	1	1116	128.008	5.97		6
FALSE	High	Master Protein	Q96TC7	Regulator of microtubule dynamics protein 3 OS=Homo sapiens GN=RMDN3 PE=1 SV=2	0	16.1095	12.9787	4	6	4	1	470	52.086	5.1		6
FALSE	High	Master Protein	O43447	Peptidyl-prolyl cis-trans isomerase H OS=Homo sapiens GN=PPIH PE=1 SV=1	0	15.6829	22.5989	4	6	4	1	177	19.196	8.07		6
FALSE	High	Master Protein	Q6SJ93	Protein FAM111B OS=Homo sapiens GN=FAM111B PE=1 SV=1	0	14.2283	6.81199	6	6	6	1	734	84.62	8.59		6
FALSE	High	Master Protein	Q9H7B2	Ribosome production factor 2 homolog OS=Homo sapiens GN=RPF2 PE=1 SV=2	0	9.21636	11.1111	4	6	4	1	306	35.56	9.99		6
FALSE	High	Master Protein	Q86W42	THO complex subunit 6 homolog OS=Homo sapiens GN=THOC6 PE=1 SV=1	0	25.7617	17.5953	4	5	4	1	341	37.511	7.43		5
FALSE	High	Master Protein	O75909	Cyclin-K OS=Homo sapiens GN=CCNK PE=1 SV=2	0	21.8019	12.931	5	5	5	1	580	64.199	8.41		5
FALSE	High	Master Protein	Q1ED39	Lysine-rich nucleolar protein 1 OS=Homo sapiens GN=KNOP1 PE=1 SV=1	0	21.4681	16.1572	5	5	5	1	458	51.557	9.86		5
FALSE	High	Master Protein	Q9GZS1	DNA-directed RNA polymerase I subunit RPA49 OS=Homo sapiens GN=POLR1E PE=1 SV=2	0	19.607	10.8108	5	5	5	1	481	53.928	8.56		5
FALSE	High	Master Protein	P53814	Smoothelin OS=Homo sapiens GN=SMTN PE=1 SV=7	0	17.8788	6.54308	5	5	5	1	917	98.998	9.07		5
FALSE	High	Master Protein	Q53G59	Kelch-like protein 12 OS=Homo sapiens GN=KLHL12 PE=1 SV=2	0	17.72	8.97887	5	5	5	1	568	63.236	5.44		5
FALSE	High	Master Protein	Q9H8H2	Probable ATP-dependent RNA helicase DDX31 OS=Homo sapiens GN=DDX31 PE=1 SV=2	0	16.2699	7.63807	5	5	5	1	851	94.029	9.99		5
FALSE	High	Master Protein	O43166	Signal-induced proliferation-associated 1-like protein 1 OS=Homo sapiens GN=SIPA1L1 PE=1 SV=4	0	15.8504	3.27051	5	5	5	1	1804	199.904	8.19		5
FALSE	High	Master Protein	Q8TED9	Actin filament-associated protein 1-like 1 OS=Homo sapiens GN=AFAP1L1 PE=1 SV=2	0	15.2809	5.07812	4	5	2	1	768	86.378	6.8		5
FALSE	High	Master Protein	Q8NI27	THO complex subunit 2 OS=Homo sapiens GN=THOC2 PE=1 SV=2	0	12.6671	2.82486	5	5	5	1	1593	182.659	8.44		5
FALSE	High	Master Protein	P42696	RNA-binding protein 34 OS=Homo sapiens GN=RBM34 PE=1 SV=2	0	11.6653	10.4651	5	5	5	1	430	48.535	10.11		5
FALSE	High	Master Protein	Q8N1G2	Cap-specific mRNA (nucleoside-2'-O-)-methyltransferase 1 OS=Homo sapiens GN=CMTR1 PE=1 SV=1	0	11.5407	5.26946	5	5	5	1	835	95.26	7.05		5
FALSE	High	Master Protein	Q96SB3	Neurabin-2 OS=Homo sapiens GN=PPP1R9B PE=1 SV=2	0	10.5494	5.03067	4	5	4	1	815	89.138	4.97		5
FALSE	High	Master Protein	Q96GY0	Zinc finger C2HC domain-containing protein 1A OS=Homo sapiens GN=ZC2HC1A PE=1 SV=2	0.000434028	7.55249	11.3846	4	5	4	1	325	35.07	9.82		5
FALSE	High	Master Protein	Q13425	Beta-2-syntrophin OS=Homo sapiens GN=SNTB2 PE=1 SV=1	0.000761905	7.34877	5	3	5	3	1	540	57.913	8.82		5
FALSE	High	Master Protein	Q9NY61	Protein AATF OS=Homo sapiens GN=AATF PE=1 SV=1	0	20.6004	5.35714	3	4	3	1	560	63.094	4.94		4
FALSE	High	Master Protein	Q5TB30	DEP domain-containing protein 1A OS=Homo sapiens GN=DEPDC1 PE=1 SV=2	0	18.1189	4.31566	3	4	3	1	811	92.901	8.68		4
FALSE	High	Master Protein	O75330	Hyaluronan mediated motility receptor OS=Homo sapiens GN=HMMR PE=1 SV=2	0	17.9842	8.56354	4	4	4	1	724	84.049	5.83		4
FALSE	High	Master Protein	A6NI28	Rho GTPase-activating protein 42 OS=Homo sapiens GN=ARHGAP42 PE=1 SV=3	0	16.788	5.72082	4	4	4	1	874	98.507	7.99		4
FALSE	High	Master Protein	Q8IXI1	Mitochondrial Rho GTPase 2 OS=Homo sapiens GN=RHOT2 PE=1 SV=2	0	15.8528	7.44337	4	4	4	1	618	68.075	5.86		4
FALSE	High	Master Protein	Q9NUQ6	SPATS2-like protein OS=Homo sapiens GN=SPATS2L PE=1 SV=2	0	15.8158	10.5735	4	4	4	1	558	61.691	9.64		4
FALSE	High	Master Protein	Q4KMQ1	Taperin OS=Homo sapiens GN=TPRN PE=1 SV=2	0	15.5201	5.90717	3	4	3	1	711	75.51	7.25		4
FALSE	High	Master Protein	Q8N3V7	Synaptopodin OS=Homo sapiens GN=SYNPO PE=1 SV=2	0	15.1465	6.13563	4	4	4	1	929	99.402	8.72		4
FALSE	High	Master Protein	Q9NZ32	Actin-related protein 10 OS=Homo sapiens GN=ACTR10 PE=1 SV=1	0	14.8974	16.0671	4	4	4	1	417	46.277	7.37		4
FALSE	High	Master Protein	Q99501	GAS2-like protein 1 OS=Homo sapiens GN=GAS2L1 PE=1 SV=2	0	14.7532	8.07636	4	4	4	1	681	72.672	10.05		4
FALSE	High	Master Protein	Q6ZU35	Uncharacterized protein KIAA1211 OS=Homo sapiens GN=KIAA1211 PE=1 SV=3	0	14.0195	4.37956	4	4	4	1	1233	136.678	5.6		4
FALSE	High	Master Protein	Q9P1Z2	Calcium-binding and coiled-coil domain-containing protein 1 OS=Homo sapiens GN=CALCOCO1 PE=1 SV=2	0	13.1135	4.63097	3	4	3	1	691	77.289	4.82		4
FALSE	High	Master Protein	Q9Y2R5	28S ribosomal protein S17, mitochondrial OS=Homo sapiens GN=MRPS17 PE=1 SV=1	0	12.7892	44.6154	4	4	4	1	130	14.493	9.85		4
FALSE	High	Master Protein	Q96FS4	Signal-induced proliferation-associated protein 1 OS=Homo sapiens GN=SIPA1 PE=1 SV=1	0	12.4867	4.03071	4	4	4	1	1042	112.08	6.6		4
FALSE	High	Master Protein	Q8TEH3	DENN domain-containing protein 1A OS=Homo sapiens GN=DENND1A PE=1 SV=2	0	12.3646	4.55897	4	4	4	1	1009	110.508	6.96		4
FALSE	High	Master Protein	P83369	U7 snRNA-associated Sm-like protein LSm11 OS=Homo sapiens GN=LSM11 PE=1 SV=2	0	12.3319	13.3333	4	4	4	1	360	39.476	10.99		4
FALSE	High	Master Protein	O95478	Ribosome biogenesis protein NSA2 homolog OS=Homo sapiens GN=NSA2 PE=1 SV=1	0	12.2341	14.2308	4	4	4	1	260	30.047	10.27		4
FALSE	High	Master Protein	O60292	Signal-induced proliferation-associated 1-like protein 3 OS=Homo sapiens GN=SIPA1L3 PE=1 SV=3	0	12.0094	2.35823	4	4	4	1	1781	194.49	8.32		4
FALSE	High	Master Protein	P17612	cAMP-dependent protein kinase catalytic subunit alpha OS=Homo sapiens GN=PRKACA PE=1 SV=2	0	11.9981	8.83191	4	4	1	1	351	40.564	8.79		4
FALSE	High	Master Protein	Q9GZR2	RNA exonuclease 4 OS=Homo sapiens GN=REXO4 PE=1 SV=2	0	11.8666	8.53081	4	4	4	1	422	46.643	9.77		4
FALSE	High	Master Protein	O95639	Cleavage and polyadenylation specificity factor subunit 4 OS=Homo sapiens GN=CPSF4 PE=1 SV=1	0	10.8709	18.9591	3	4	3	1	269	30.235	8.31		4
FALSE	High	Master Protein	O75880	Protein SCO1 homolog, mitochondrial OS=Homo sapiens GN=SCO1 PE=1 SV=1	0	10.7242	10.6312	3	4	3	1	301	33.793	8.88		4
FALSE	High	Master Protein	Q9ULT0	Tetratricopeptide repeat protein 7A OS=Homo sapiens GN=TTC7A PE=1 SV=3	0	10.7219	3.84615	3	4	3	1	858	96.123	6.46		4
FALSE	High	Master Protein	Q9BRU9	rRNA-processing protein UTP23 homolog OS=Homo sapiens GN=UTP23 PE=1 SV=2	0	10.2737	19.2771	4	4	4	1	249	28.384	10.07		4
FALSE	High	Master Protein	O14893	Gem-associated protein 2 OS=Homo sapiens GN=GEMIN2 PE=1 SV=1	0	10.1603	16.7857	4	4	4	1	280	31.565	5.58		4
FALSE	High	Master Protein	Q5T5U3	Rho GTPase-activating protein 21 OS=Homo sapiens GN=ARHGAP21 PE=1 SV=1	0	10.0925	2.65713	4	4	4	1	1957	217.198	7.8		4
FALSE	High	Master Protein	Q8TDM6	Disks large homolog 5 OS=Homo sapiens GN=DLG5 PE=1 SV=4	0	9.85439	2.13653	4	4	4	1	1919	213.735	7.42		4
FALSE	High	Master Protein	Q7Z460	CLIP-associating protein 1 OS=Homo sapiens GN=CLASP1 PE=1 SV=1	0	9.32353	1.75553	4	4	2	1	1538	169.346	9.03		4
FALSE	High	Master Protein	Q9UIG0	Tyrosine-protein kinase BAZ1B OS=Homo sapiens GN=BAZ1B PE=1 SV=2	0	8.74045	3.23668	4	4	4	1	1483	170.796	8.48		4
FALSE	High	Master Protein	Q86UN3	Reticulon-4 receptor-like 2 OS=Homo sapiens GN=RTN4RL2 PE=1 SV=1	0	8.32466	6.66667	3	4	3	1	420	46.077	7.62		4
FALSE	High	Master Protein	Q9BQ52	Zinc phosphodiesterase ELAC protein 2 OS=Homo sapiens GN=ELAC2 PE=1 SV=2	0	8.01413	4.47942	4	4	4	1	826	92.16	7.9		4
FALSE	High	Master Protein	Q6P4F7	Rho GTPase-activating protein 11A OS=Homo sapiens GN=ARHGAP11A PE=1 SV=2	0	7.84687	3.12805	3	4	3	1	1023	113.795	9.07		4
FALSE	High	Master Protein	Q96EU6	Ribosomal RNA processing protein 36 homolog OS=Homo sapiens GN=RRP36 PE=1 SV=1	0.000434028	7.54662	8.49421	4	4	4	1	259	29.805	10.17		4
FALSE	High	Master Protein	Q6P6C2	RNA demethylase ALKBH5 OS=Homo sapiens GN=ALKBH5 PE=1 SV=2	0.000761905	7.09366	6.59898	3	4	3	1	394	44.229	9.09		4
FALSE	High	Master Protein	Q9BVG8	Kinesin-like protein KIFC3 OS=Homo sapiens GN=KIFC3 PE=1 SV=4	0.000761905	7.07482	3.48139	3	4	3	1	833	92.718	7.69		4
FALSE	High	Master Protein	P07305	Histone H1.0 OS=Homo sapiens GN=H1F0 PE=1 SV=3	0.000761905	6.00498	9.79381	2	4	2	1	194	20.85	10.84		4
FALSE	High	Master Protein	Q9H9J4	Ubiquitin carboxyl-terminal hydrolase 42 OS=Homo sapiens GN=USP42 PE=1 SV=3	0	17.4017	3.32326	3	3	3	1	1324	145.302	8.63		3
FALSE	High	Master Protein	Q16698	2,4-dienoyl-CoA reductase, mitochondrial OS=Homo sapiens GN=DECR1 PE=1 SV=1	0	15.398	12.5373	3	3	3	1	335	36.045	9.28		3
FALSE	High	Master Protein	P31274	Homeobox protein Hox-C9 OS=Homo sapiens GN=HOXC9 PE=1 SV=3	0	15.0104	16.9231	3	3	3	1	260	29.229	9.04		3
FALSE	High	Master Protein	Q13421	Mesothelin OS=Homo sapiens GN=MSLN PE=1 SV=2	0	13.6112	6.98413	3	3	3	1	630	68.942	6.38		3
FALSE	High	Master Protein	Q6IAN0	Dehydrogenase/reductase SDR family member 7B OS=Homo sapiens GN=DHRS7B PE=1 SV=2	0	13.5687	10.7692	3	3	3	1	325	35.097	9.55		3
FALSE	High	Master Protein	Q5VT25	Serine/threonine-protein kinase MRCK alpha OS=Homo sapiens GN=CDC42BPA PE=1 SV=1	0	12.9076	2.13626	3	3	3	1	1732	197.182	6.58		3
FALSE	High	Master Protein	Q9BRS2	Serine/threonine-protein kinase RIO1 OS=Homo sapiens GN=RIOK1 PE=1 SV=2	0	12.7385	5.98592	3	3	3	1	568	65.542	6.19		3
FALSE	High	Master Protein	Q9NR50	Translation initiation factor eIF-2B subunit gamma OS=Homo sapiens GN=EIF2B3 PE=1 SV=1	0	12.3436	10.6195	3	3	3	1	452	50.208	6.47		3
FALSE	High	Master Protein	P55036	26S proteasome non-ATPase regulatory subunit 4 OS=Homo sapiens GN=PSMD4 PE=1 SV=1	0	11.9712	9.54907	3	3	3	1	377	40.711	4.79		3
FALSE	High	Master Protein	O95983	Methyl-CpG-binding domain protein 3 OS=Homo sapiens GN=MBD3 PE=1 SV=1	0	11.7001	9.62199	3	3	2	1	291	32.823	5.34		3
FALSE	High	Master Protein	Q9UJX5	Anaphase-promoting complex subunit 4 OS=Homo sapiens GN=ANAPC4 PE=1 SV=2	0	11.4518	4.70297	3	3	3	1	808	92.058	5.53		3
FALSE	High	Master Protein	Q9NXR1	Nuclear distribution protein nudE homolog 1 OS=Homo sapiens GN=NDE1 PE=1 SV=2	0	11.1905	11.8497	3	3	3	1	346	38.785	5.27		3
FALSE	High	Master Protein	Q9UJX4	Anaphase-promoting complex subunit 5 OS=Homo sapiens GN=ANAPC5 PE=1 SV=2	0	11.1185	4.76821	3	3	3	1	755	85.023	6.87		3
FALSE	High	Master Protein	P82912	28S ribosomal protein S11, mitochondrial OS=Homo sapiens GN=MRPS11 PE=1 SV=2	0	10.6003	21.6495	3	3	3	1	194	20.603	10.81		3
FALSE	High	Master Protein	P52732	Kinesin-like protein KIF11 OS=Homo sapiens GN=KIF11 PE=1 SV=2	0	10.5733	2.84091	3	3	3	1	1056	119.085	5.64		3
FALSE	High	Master Protein	Q92917	G patch domain and KOW motifs-containing protein OS=Homo sapiens GN=GPKOW PE=1 SV=2	0	10.5011	7.56303	3	3	3	1	476	52.197	6.15		3
FALSE	High	Master Protein	O60784	Target of Myb protein 1 OS=Homo sapiens GN=TOM1 PE=1 SV=2	0	10.2002	5.89431	2	3	2	1	492	53.785	4.7		3
FALSE	High	Master Protein	P57740	Nuclear pore complex protein Nup107 OS=Homo sapiens GN=NUP107 PE=1 SV=1	0	10.1707	3.67568	3	3	3	1	925	106.307	5.43		3
FALSE	High	Master Protein	Q9Y4W6	AFG3-like protein 2 OS=Homo sapiens GN=AFG3L2 PE=1 SV=2	0	9.18981	3.3877	3	3	3	1	797	88.528	8.66		3
FALSE	High	Master Protein	Q9P275	Ubiquitin carboxyl-terminal hydrolase 36 OS=Homo sapiens GN=USP36 PE=1 SV=3	0	9.00966	2.40856	3	3	3	1	1121	122.575	9.67		3
FALSE	High	Master Protein	Q8IVF7	Formin-like protein 3 OS=Homo sapiens GN=FMNL3 PE=1 SV=3	0	8.9922	3.11284	3	3	1	1	1028	117.139	6.65		3
FALSE	High	Master Protein	Q9Y657	Spindlin-1 OS=Homo sapiens GN=SPIN1 PE=1 SV=3	0	8.98913	13.7405	3	3	3	1	262	29.582	6.96		3
FALSE	High	Master Protein	Q5HYJ3	Protein FAM76B OS=Homo sapiens GN=FAM76B PE=1 SV=3	0	8.753	9.43953	3	3	3	1	339	38.683	9.25		3
FALSE	High	Master Protein	Q9Y312	Protein AAR2 homolog OS=Homo sapiens GN=AAR2 PE=1 SV=2	0	8.61542	8.59375	3	3	3	1	384	43.444	5.96		3
FALSE	High	Master Protein	P79522	Proline-rich protein 3 OS=Homo sapiens GN=PRR3 PE=1 SV=2	0	8.33089	15.4255	2	3	2	1	188	20.627	9.83		3
FALSE	High	Master Protein	Q92738	USP6 N-terminal-like protein OS=Homo sapiens GN=USP6NL PE=1 SV=3	0	7.89266	4.71014	3	3	3	1	828	94.046	9.07		3
FALSE	High	Master Protein	Q14141	Septin-6 OS=Homo sapiens GN=SEPT6 PE=1 SV=4	0	7.82831	5.76037	3	3	2	1	434	49.685	6.67		3
FALSE	High	Master Protein	Q9BXF6	Rab11 family-interacting protein 5 OS=Homo sapiens GN=RAB11FIP5 PE=1 SV=1	0.000434028	7.74761	3.98162	3	3	3	1	653	70.372	9.23		3
FALSE	High	Master Protein	P46013	Antigen KI-67 OS=Homo sapiens GN=MKI67 PE=1 SV=2	0.000434028	7.70406	1.32064	3	3	3	1	3256	358.474	9.45		3
FALSE	High	Master Protein	Q6PIY7	Poly(A) RNA polymerase GLD2 OS=Homo sapiens GN=PAPD4 PE=1 SV=1	0.000434028	7.70071	7.2314	3	3	3	1	484	55.992	9.38		3
FALSE	High	Master Protein	Q9P270	SLAIN motif-containing protein 2 OS=Homo sapiens GN=SLAIN2 PE=1 SV=2	0.000434028	7.65796	6.36833	3	3	3	1	581	62.505	9.45		3
FALSE	High	Master Protein	Q9BWG6	Sodium channel modifier 1 OS=Homo sapiens GN=SCNM1 PE=1 SV=1	0.000434028	7.6436	8.26087	3	3	3	1	230	25.933	8.87		3
FALSE	High	Master Protein	Q8NEM2	SHC SH2 domain-binding protein 1 OS=Homo sapiens GN=SHCBP1 PE=1 SV=3	0.000434028	7.53735	4.46429	3	3	3	1	672	75.642	4.75		3
FALSE	High	Master Protein	Q15773	Myeloid leukemia factor 2 OS=Homo sapiens GN=MLF2 PE=1 SV=1	0.000434028	7.47257	8.46774	2	3	2	1	248	28.129	6.9		3
FALSE	High	Master Protein	Q9P2R3	Rabankyrin-5 OS=Homo sapiens GN=ANKFY1 PE=1 SV=2	0.000434028	7.43223	1.79641	2	3	2	1	1169	128.318	6.1		3
FALSE	High	Master Protein	Q7RTP6	Protein-methionine sulfoxide oxidase MICAL3 OS=Homo sapiens GN=MICAL3 PE=1 SV=2	0.000761905	7.24266	1.5984	3	3	3	1	2002	224.156	5.55		3
FALSE	High	Master Protein	Q96HE9	Proline-rich protein 11 OS=Homo sapiens GN=PRR11 PE=1 SV=1	0.000761905	7.00685	6.94444	2	3	2	1	360	40.06	10.11		3
FALSE	High	Master Protein	Q96PY5	Formin-like protein 2 OS=Homo sapiens GN=FMNL2 PE=1 SV=3	0.000761905	6.7147	2.67035	3	3	1	1	1086	123.243	7.4		3
FALSE	High	Master Protein	Q15746	Myosin light chain kinase, smooth muscle OS=Homo sapiens GN=MYLK PE=1 SV=4	0.000761905	6.44377	1.72414	3	3	3	1	1914	210.583	6.15		3
FALSE	High	Master Protein	Q9ULW0	Targeting protein for Xklp2 OS=Homo sapiens GN=TPX2 PE=1 SV=2	0.000761905	6.36553	3.48059	3	3	3	1	747	85.6	9.23		3
FALSE	High	Master Protein	O95248	Myotubularin-related protein 5 OS=Homo sapiens GN=SBF1 PE=1 SV=3	0.000761905	6.2021	1.39261	3	3	3	1	1867	208.184	6.9		3
FALSE	High	Master Protein	Q13325	Interferon-induced protein with tetratricopeptide repeats 5 OS=Homo sapiens GN=IFIT5 PE=1 SV=1	0.000761905	6.0709	3.73444	2	3	1	1	482	55.812	7.4		3
FALSE	High	Master Protein	O75122	CLIP-associating protein 2 OS=Homo sapiens GN=CLASP2 PE=1 SV=2	0.000761905	5.97136	1.1592	3	3	1	1	1294	141.046	8.47		3
FALSE	High	Master Protein	Q8NFJ5	Retinoic acid-induced protein 3 OS=Homo sapiens GN=GPRC5A PE=1 SV=2	0.000761905	5.71895	5.32213	2	3	2	1	357	40.225	8.15		3
FALSE	High	Master Protein	Q8N1T3	Unconventional myosin-Ih OS=Homo sapiens GN=MYO1H PE=2 SV=2	0.00307482	3.9704	1.45349	2	3	1	1	1032	118.962	9.09		3
FALSE	High	Master Protein	Q13123	Protein Red OS=Homo sapiens GN=IK PE=1 SV=3	0.00370246	3.88206	2.693	2	3	2	1	557	65.562	6.64		3
FALSE	High	Master Protein	P07711	Cathepsin L1 OS=Homo sapiens GN=CTSL PE=1 SV=2	0.00654818	3.09977	5.10511	2	3	2	1	333	37.54	5.45		3
FALSE	Low	Master Protein	Q9HBH5	Retinol dehydrogenase 14 OS=Homo sapiens GN=RDH14 PE=1 SV=1	0.0744628	1.27761	2.38095	1	3	1	1	336	36.841	8.79		3
FALSE	High	Master Protein	P05386	60S acidic ribosomal protein P1 OS=Homo sapiens GN=RPLP1 PE=1 SV=1	0	13.2539	14.0351	1	2	1	1	114	11.507	4.32		2
FALSE	High	Master Protein	P49005	DNA polymerase delta subunit 2 OS=Homo sapiens GN=POLD2 PE=1 SV=1	0	11.2886	5.97015	2	2	2	1	469	51.257	5.58		2
FALSE	High	Master Protein	Q15032	R3H domain-containing protein 1 OS=Homo sapiens GN=R3HDM1 PE=1 SV=3	0	10.6223	2.54777	2	2	2	1	1099	120.621	8.75		2
FALSE	High	Master Protein	O95292	Vesicle-associated membrane protein-associated protein B/C OS=Homo sapiens GN=VAPB PE=1 SV=3	0	10.4447	11.5226	2	2	1	1	243	27.211	7.3		2
FALSE	High	Master Protein	Q9NX57	Ras-related protein Rab-20 OS=Homo sapiens GN=RAB20 PE=1 SV=1	0	9.86954	5.98291	1	2	1	1	234	26.26	6.55		2
FALSE	High	Master Protein	O95926	Pre-mRNA-splicing factor SYF2 OS=Homo sapiens GN=SYF2 PE=1 SV=1	0	9.4157	11.1111	2	2	2	1	243	28.705	8.4		2
FALSE	High	Master Protein	Q9BT78	COP9 signalosome complex subunit 4 OS=Homo sapiens GN=COPS4 PE=1 SV=1	0	9.01474	5.41872	2	2	2	1	406	46.24	5.83		2
FALSE	High	Master Protein	Q9H3H1	tRNA dimethylallyltransferase, mitochondrial OS=Homo sapiens GN=TRIT1 PE=1 SV=1	0	8.88428	5.56745	2	2	2	1	467	52.692	8.21		2
FALSE	High	Master Protein	Q13835	Plakophilin-1 OS=Homo sapiens GN=PKP1 PE=1 SV=2	0	8.88081	3.48059	2	2	2	1	747	82.808	9.13		2
FALSE	High	Master Protein	Q6P1X5	Transcription initiation factor TFIID subunit 2 OS=Homo sapiens GN=TAF2 PE=1 SV=3	0	8.77507	1.83486	2	2	2	1	1199	136.883	8.19		2
FALSE	High	Master Protein	P30260	Cell division cycle protein 27 homolog OS=Homo sapiens GN=CDC27 PE=1 SV=2	0	8.67157	3.03398	2	2	2	1	824	91.809	7.02		2
FALSE	High	Master Protein	Q8NFF5	FAD synthase OS=Homo sapiens GN=FLAD1 PE=1 SV=1	0	8.51944	5.79216	2	2	2	1	587	65.224	6.93		2
FALSE	High	Master Protein	Q8WWK9	Cytoskeleton-associated protein 2 OS=Homo sapiens GN=CKAP2 PE=1 SV=1	0	8.39579	4.39239	2	2	2	1	683	76.939	9.41		2
FALSE	High	Master Protein	Q6NW34	Uncharacterized protein C3orf17 OS=Homo sapiens GN=C3orf17 PE=1 SV=3	0	8.36275	4.2328	2	2	2	1	567	64.51	9.74		2
FALSE	High	Master Protein	Q96BQ5	Coiled-coil domain-containing protein 127 OS=Homo sapiens GN=CCDC127 PE=1 SV=1	0	8.35353	8.84615	2	2	2	1	260	30.815	9.2		2
FALSE	High	Master Protein	Q14249	Endonuclease G, mitochondrial OS=Homo sapiens GN=ENDOG PE=1 SV=4	0	7.8822	7.74411	2	2	2	1	297	32.6	9.5		2
FALSE	High	Master Protein	Q9Y4F1	FERM, RhoGEF and pleckstrin domain-containing protein 1 OS=Homo sapiens GN=FARP1 PE=1 SV=1	0	7.84216	2.00957	2	2	2	1	1045	118.559	8.15		2
FALSE	High	Master Protein	O60341	Lysine-specific histone demethylase 1A OS=Homo sapiens GN=KDM1A PE=1 SV=2	0.000434028	7.69862	2.93427	2	2	2	1	852	92.845	6.52		2
FALSE	High	Master Protein	Q9UIV1	CCR4-NOT transcription complex subunit 7 OS=Homo sapiens GN=CNOT7 PE=1 SV=3	0.000434028	7.66766	7.36842	2	2	2	1	285	32.724	4.84		2
FALSE	High	Master Protein	Q6W2J9	BCL-6 corepressor OS=Homo sapiens GN=BCOR PE=1 SV=1	0.000434028	7.66361	1.4245	2	2	2	1	1755	192.069	6.48		2
FALSE	High	Master Protein	O15534	Period circadian protein homolog 1 OS=Homo sapiens GN=PER1 PE=1 SV=2	0.000434028	7.62631	2.09302	2	2	2	1	1290	136.127	6.09		2
FALSE	High	Master Protein	Q96AQ6	Pre-B-cell leukemia transcription factor-interacting protein 1 OS=Homo sapiens GN=PBXIP1 PE=1 SV=1	0.000434028	7.60296	2.87278	2	2	2	1	731	80.594	5.33		2
FALSE	High	Master Protein	Q9Y371	Endophilin-B1 OS=Homo sapiens GN=SH3GLB1 PE=1 SV=1	0.000434028	7.43219	7.12329	2	2	2	1	365	40.771	6.04		2
FALSE	High	Master Protein	Q499Z4	Zinc finger protein 672 OS=Homo sapiens GN=ZNF672 PE=2 SV=2	0.000761905	7.25082	4.86726	2	2	2	1	452	50.192	9.89		2
FALSE	High	Master Protein	Q9BRT6	Protein LLP homolog OS=Homo sapiens GN=LLPH PE=1 SV=1	0.000761905	7.14921	23.2558	2	2	2	1	129	15.215	10.37		2
FALSE	High	Master Protein	Q8WW12	PEST proteolytic signal-containing nuclear protein OS=Homo sapiens GN=PCNP PE=1 SV=2	0.000761905	7.12805	11.236	2	2	2	1	178	18.913	7.49		2
FALSE	High	Master Protein	Q9UHD2	Serine/threonine-protein kinase TBK1 OS=Homo sapiens GN=TBK1 PE=1 SV=1	0.000761905	7.05166	3.01783	2	2	2	1	729	83.589	6.79		2
FALSE	High	Master Protein	Q96LT9	RNA-binding protein 40 OS=Homo sapiens GN=RNPC3 PE=1 SV=1	0.000761905	6.97061	6.96325	2	2	2	1	517	58.538	7.72		2
FALSE	High	Master Protein	Q32P44	Echinoderm microtubule-associated protein-like 3 OS=Homo sapiens GN=EML3 PE=1 SV=1	0.000761905	6.93804	2.67857	2	2	2	1	896	95.138	7.12		2
FALSE	High	Master Protein	Q9NPF5	DNA methyltransferase 1-associated protein 1 OS=Homo sapiens GN=DMAP1 PE=1 SV=1	0.000761905	6.88331	5.78158	2	2	2	1	467	52.96	9.5		2
FALSE	High	Master Protein	P61923	Coatomer subunit zeta-1 OS=Homo sapiens GN=COPZ1 PE=1 SV=1	0.000761905	6.78885	14.1243	2	2	2	1	177	20.185	4.81		2
FALSE	High	Master Protein	O15511	Actin-related protein 2/3 complex subunit 5 OS=Homo sapiens GN=ARPC5 PE=1 SV=3	0.000761905	6.41013	16.5563	2	2	2	1	151	16.31	5.67		2
FALSE	High	Master Protein	Q56NI9	N-acetyltransferase ESCO2 OS=Homo sapiens GN=ESCO2 PE=1 SV=1	0.000761905	6.33684	3.49418	2	2	2	1	601	68.264	9.39		2
FALSE	High	Master Protein	P04004	Vitronectin OS=Homo sapiens GN=VTN PE=1 SV=1	0.000761905	6.30601	3.13808	1	2	1	1	478	54.271	5.8		2
FALSE	High	Master Protein	O75446	Histone deacetylase complex subunit SAP30 OS=Homo sapiens GN=SAP30 PE=1 SV=1	0.000761905	6.27406	9.54545	2	2	2	1	220	23.292	9.17		2
FALSE	High	Master Protein	Q13769	THO complex subunit 5 homolog OS=Homo sapiens GN=THOC5 PE=1 SV=2	0.000761905	6.26629	3.95315	2	2	2	1	683	78.458	6.87		2
FALSE	High	Master Protein	Q9P2F8	Signal-induced proliferation-associated 1-like protein 2 OS=Homo sapiens GN=SIPA1L2 PE=1 SV=2	0.000761905	6.18793	1.62602	2	2	2	1	1722	190.318	6.77		2
FALSE	High	Master Protein	Q9UH99	SUN domain-containing protein 2 OS=Homo sapiens GN=SUN2 PE=1 SV=3	0.000761905	6.15009	3.06834	2	2	2	1	717	80.262	6.73		2
FALSE	High	Master Protein	Q8TER5	Rho guanine nucleotide exchange factor 40 OS=Homo sapiens GN=ARHGEF40 PE=1 SV=3	0.000761905	6.06651	1.71165	2	2	2	1	1519	164.555	6.15		2
FALSE	High	Master Protein	Q12933	TNF receptor-associated factor 2 OS=Homo sapiens GN=TRAF2 PE=1 SV=2	0.000761905	6.05877	4.59082	2	2	2	1	501	55.823	7.53		2
FALSE	High	Master Protein	O00233	26S proteasome non-ATPase regulatory subunit 9 OS=Homo sapiens GN=PSMD9 PE=1 SV=3	0.000761905	6.04202	8.52018	2	2	2	1	223	24.667	6.95		2
FALSE	High	Master Protein	Q9H8G2	Caspase activity and apoptosis inhibitor 1 OS=Homo sapiens GN=CAAP1 PE=1 SV=2	0.000761905	6.01886	5.54017	2	2	2	1	361	38.344	4.72		2
FALSE	High	Master Protein	Q08554	Desmocollin-1 OS=Homo sapiens GN=DSC1 PE=1 SV=2	0.000761905	5.95782	1.67785	1	2	1	1	894	99.924	5.43		2
FALSE	High	Master Protein	Q8IX01	SURP and G-patch domain-containing protein 2 OS=Homo sapiens GN=SUGP2 PE=1 SV=2	0.000761905	5.8595	1.94085	2	2	2	1	1082	120.132	7.28		2
FALSE	High	Master Protein	Q9H1I8	Activating signal cointegrator 1 complex subunit 2 OS=Homo sapiens GN=ASCC2 PE=1 SV=3	0.000761905	5.85771	2.37781	2	2	2	1	757	86.306	5.16		2
FALSE	High	Master Protein	Q9H3N1	Thioredoxin-related transmembrane protein 1 OS=Homo sapiens GN=TMX1 PE=1 SV=1	0.000761905	5.82074	8.21429	2	2	2	1	280	31.771	4.98		2
FALSE	High	Master Protein	Q96EZ8	Microspherule protein 1 OS=Homo sapiens GN=MCRS1 PE=1 SV=1	0.000761905	5.79659	6.70996	2	2	2	1	462	51.771	9.38		2
FALSE	High	Master Protein	Q9NXE8	Pre-mRNA-splicing factor CWC25 homolog OS=Homo sapiens GN=CWC25 PE=1 SV=1	0.000761905	5.7749	4.47059	2	2	2	1	425	49.617	10.18		2
FALSE	High	Master Protein	Q9Y5B6	PAX3- and PAX7-binding protein 1 OS=Homo sapiens GN=PAXBP1 PE=1 SV=2	0.000761905	5.67925	1.96292	2	2	2	1	917	104.739	5.68		2
FALSE	High	Master Protein	Q8NCD3	Holliday junction recognition protein OS=Homo sapiens GN=HJURP PE=1 SV=2	0.000761905	5.67288	3.60963	2	2	2	1	748	83.487	9.31		2
FALSE	High	Master Protein	Q13470	Non-receptor tyrosine-protein kinase TNK1 OS=Homo sapiens GN=TNK1 PE=1 SV=3	0.000761905	5.63154	4.2042	2	2	2	1	666	72.422	9.48		2
FALSE	High	Master Protein	P49184	Deoxyribonuclease-1-like 1 OS=Homo sapiens GN=DNASE1L1 PE=1 SV=1	0.000761905	5.49649	9.93377	2	2	2	1	302	33.871	5.74		2
FALSE	High	Master Protein	Q5D862	Filaggrin-2 OS=Homo sapiens GN=FLG2 PE=1 SV=1	0.000761905	5.47006	0.501882	1	2	1	1	2391	247.928	8.31		2
FALSE	High	Master Protein	P98179	RNA-binding protein 3 OS=Homo sapiens GN=RBM3 PE=1 SV=1	0.000761905	5.41481	15.9236	2	2	2	1	157	17.16	8.91		2
FALSE	High	Master Protein	P67812	Signal peptidase complex catalytic subunit SEC11A OS=Homo sapiens GN=SEC11A PE=1 SV=1	0.000761905	5.40739	9.49721	2	2	2	1	179	20.612	9.48		2
FALSE	High	Master Protein	Q9H6W3	Bifunctional lysine-specific demethylase and histidyl-hydroxylase NO66 OS=Homo sapiens GN=NO66 PE=1 SV=2	0.000761905	5.38152	3.74415	2	2	2	1	641	71.041	6.46		2
FALSE	High	Master Protein	Q9BQP7	Mitochondrial genome maintenance exonuclease 1 OS=Homo sapiens GN=MGME1 PE=1 SV=1	0.000761905	5.34839	4.65116	2	2	2	1	344	39.396	7.68		2
FALSE	High	Master Protein	Q9NP50	Protein FAM60A OS=Homo sapiens GN=FAM60A PE=1 SV=1	0.000761905	5.31575	8.1448	2	2	2	1	221	24.836	9.41		2
FALSE	High	Master Protein	P55199	RNA polymerase II elongation factor ELL OS=Homo sapiens GN=ELL PE=1 SV=1	0.000761905	5.26295	2.73752	2	2	2	1	621	68.223	9.33		2
FALSE	High	Master Protein	P07339	Cathepsin D OS=Homo sapiens GN=CTSD PE=1 SV=1	0.000761905	5.18058	4.12621	2	2	2	1	412	44.524	6.54		2
FALSE	High	Master Protein	Q9NXH8	Torsin-4A OS=Homo sapiens GN=TOR4A PE=1 SV=2	0.00110742	5.04723	4.49173	2	2	2	1	423	46.885	9.94		2
FALSE	High	Master Protein	Q9BZZ5	Apoptosis inhibitor 5 OS=Homo sapiens GN=API5 PE=1 SV=3	0.00110742	5.02502	4.77099	2	2	2	1	524	58.968	7.34		2
FALSE	High	Master Protein	P0DMU6	Cancer/testis antigen family 45 member A4 OS=Homo sapiens GN=CT45A4 PE=2 SV=1	0.00110742	5.0144	8.99471	2	2	2	1	189	21.231	9.76		2
FALSE	High	Master Protein	P19784	Casein kinase II subunit alpha' OS=Homo sapiens GN=CSNK2A2 PE=1 SV=1	0.00110742	5.00689	6.28571	2	2	2	1	350	41.187	8.56		2
FALSE	High	Master Protein	Q14678	KN motif and ankyrin repeat domain-containing protein 1 OS=Homo sapiens GN=KANK1 PE=1 SV=3	0.00110742	4.98153	2.21893	2	2	2	1	1352	147.197	5.3		2
FALSE	High	Master Protein	Q9H5U6	Zinc finger CCHC domain-containing protein 4 OS=Homo sapiens GN=ZCCHC4 PE=1 SV=3	0.00110742	4.8881	3.11891	2	2	2	1	513	58.971	8.75		2
FALSE	High	Master Protein	Q9UJF2	Ras GTPase-activating protein nGAP OS=Homo sapiens GN=RASAL2 PE=1 SV=2	0.00143988	4.84235	1.75593	2	2	2	1	1139	128.477	8.24		2
FALSE	High	Master Protein	Q9Y6K5	2'-5'-oligoadenylate synthase 3 OS=Homo sapiens GN=OAS3 PE=1 SV=3	0.00143988	4.75899	2.11592	2	2	2	1	1087	121.093	8.4		2
FALSE	High	Master Protein	P29597	Non-receptor tyrosine-protein kinase TYK2 OS=Homo sapiens GN=TYK2 PE=1 SV=3	0.00143988	4.72572	1.34794	2	2	2	1	1187	133.565	7.15		2
FALSE	High	Master Protein	Q6NUM9	All-trans-retinol 13,14-reductase OS=Homo sapiens GN=RETSAT PE=1 SV=2	0.00143988	4.5984	4.2623	2	2	2	1	610	66.777	8.28		2
FALSE	High	Master Protein	Q64LD2	WD repeat-containing protein 25 OS=Homo sapiens GN=WDR25 PE=1 SV=3	0.00143988	4.56439	2.75735	2	2	2	1	544	60.123	9		2
FALSE	High	Master Protein	Q15650	Activating signal cointegrator 1 OS=Homo sapiens GN=TRIP4 PE=1 SV=4	0.00143988	4.529	3.27022	2	2	2	1	581	66.105	7.85		2
FALSE	High	Master Protein	Q96FV9	THO complex subunit 1 OS=Homo sapiens GN=THOC1 PE=1 SV=1	0.00178699	4.48534	3.34855	2	2	2	1	657	75.619	4.98		2
FALSE	High	Master Protein	Q53GS7	Nucleoporin GLE1 OS=Homo sapiens GN=GLE1 PE=1 SV=2	0.00208117	4.41683	2.29226	2	2	2	1	698	79.786	7.43		2
FALSE	High	Master Protein	Q92485	Acid sphingomyelinase-like phosphodiesterase 3b OS=Homo sapiens GN=SMPDL3B PE=2 SV=2	0.00208117	4.20025	2.1978	1	2	1	1	455	50.781	5.64		2
FALSE	High	Master Protein	Q9NXF1	Testis-expressed sequence 10 protein OS=Homo sapiens GN=TEX10 PE=1 SV=2	0.00208117	4.19536	2.36814	2	2	2	1	929	105.608	9.36		2
FALSE	High	Master Protein	Q9BRQ6	MICOS complex subunit MIC25 OS=Homo sapiens GN=CHCHD6 PE=1 SV=1	0.00208117	4.16029	8.51064	2	2	2	1	235	26.441	8.85		2
FALSE	High	Master Protein	Q5T0W9	Protein FAM83B OS=Homo sapiens GN=FAM83B PE=1 SV=1	0.00208117	4.15738	1.6815	2	2	2	1	1011	114.729	8.97		2
FALSE	High	Master Protein	Q9NQC3	Reticulon-4 OS=Homo sapiens GN=RTN4 PE=1 SV=2	0.00208117	4.14618	1.0906	1	2	1	1	1192	129.851	4.5		2
FALSE	High	Master Protein	Q9HDC5	Junctophilin-1 OS=Homo sapiens GN=JPH1 PE=1 SV=2	0.00239808	4.01764	1.81543	1	2	1	1	661	71.642	9.32		2
FALSE	High	Master Protein	Q71F23	Centromere protein U OS=Homo sapiens GN=CENPU PE=1 SV=1	0.00239808	3.98111	2.39234	1	2	1	1	418	47.493	9.13		2
FALSE	High	Master Protein	Q9NYZ3	G2 and S phase-expressed protein 1 OS=Homo sapiens GN=GTSE1 PE=1 SV=3	0.00370246	3.91435	2.22222	1	2	1	1	720	76.598	9.39		2
FALSE	High	Master Protein	P46109	Crk-like protein OS=Homo sapiens GN=CRKL PE=1 SV=1	0.0049456	3.76946	6.27063	2	2	2	1	303	33.756	6.74		2
FALSE	High	Master Protein	O75147	Obscurin-like protein 1 OS=Homo sapiens GN=OBSL1 PE=1 SV=4	0.00520325	3.57954	1.37131	2	2	2	1	1896	206.817	5.63		2
FALSE	High	Master Protein	P42229	Signal transducer and activator of transcription 5A OS=Homo sapiens GN=STAT5A PE=1 SV=1	0.00520325	3.56687	2.51889	2	2	2	1	794	90.59	6.39		2
FALSE	High	Master Protein	P20930	Filaggrin OS=Homo sapiens GN=FLG PE=1 SV=3	0.00544	3.44021	0.246245	1	2	1	1	4061	434.922	9.25		2
FALSE	High	Master Protein	Q8WUU5	GATA zinc finger domain-containing protein 1 OS=Homo sapiens GN=GATAD1 PE=1 SV=1	0.00544	3.35102	10.4089	2	2	2	1	269	28.672	9.41		2
FALSE	High	Master Protein	Q8N1E2	Lysozyme g-like protein 1 OS=Homo sapiens GN=LYG1 PE=2 SV=1	0.00571973	3.24144	5.6701	1	2	1	1	194	21.417	8.16		2
FALSE	High	Master Protein	Q9P2B4	CTTNBP2 N-terminal-like protein OS=Homo sapiens GN=CTTNBP2NL PE=1 SV=2	0.00600506	3.19519	2.9734	2	2	2	1	639	70.115	8.06		2
FALSE	High	Master Protein	Q4G176	Acyl-CoA synthetase family member 3, mitochondrial OS=Homo sapiens GN=ACSF3 PE=1 SV=3	0.00627549	3.16551	2.60417	2	2	1	1	576	64.089	8.37		2
FALSE	High	Master Protein	Q8IY63	Angiomotin-like protein 1 OS=Homo sapiens GN=AMOTL1 PE=1 SV=1	0.00627549	3.13471	1.35983	2	2	1	1	956	106.508	7.11		2
FALSE	High	Master Protein	P23467	Receptor-type tyrosine-protein phosphatase beta OS=Homo sapiens GN=PTPRB PE=1 SV=3	0.00627549	3.11157	0.550826	1	2	1	1	1997	224.161	7.61		2
FALSE	High	Master Protein	Q9UBM7	7-dehydrocholesterol reductase OS=Homo sapiens GN=DHCR7 PE=1 SV=1	0.00627549	3.10861	3.57895	2	2	2	1	475	54.454	8.7		2
FALSE	High	Master Protein	P09543	2',3'-cyclic-nucleotide 3'-phosphodiesterase OS=Homo sapiens GN=CNP PE=1 SV=2	0.00758035	2.89585	2.13777	1	2	1	1	421	47.549	9.07		2
FALSE	High	Master Protein	Q92547	DNA topoisomerase 2-binding protein 1 OS=Homo sapiens GN=TOPBP1 PE=1 SV=3	0.0086593	2.71257	1.05125	2	2	2	1	1522	170.571	6.96		2
FALSE	High	Master Protein	Q8N8R3	Mitochondrial basic amino acids transporter OS=Homo sapiens GN=SLC25A29 PE=1 SV=2	0.0086593	2.59709	5.28053	2	2	2	1	303	32.042	8.75		2
FALSE	High	Master Protein	Q86SJ2	Amphoterin-induced protein 2 OS=Homo sapiens GN=AMIGO2 PE=1 SV=1	0.00954654	2.57963	2.87356	1	2	1	1	522	57.897	8.4		2
FALSE	High	Master Protein	O43324	Eukaryotic translation elongation factor 1 epsilon-1 OS=Homo sapiens GN=EEF1E1 PE=1 SV=1	0.00980101	2.53731	5.74713	1	2	1	1	174	19.798	8.54		2
FALSE	Medium	Master Protein	Q9BRR6	ADP-dependent glucokinase OS=Homo sapiens GN=ADPGK PE=1 SV=1	0.0134864	2.21523	3.82294	1	2	1	1	497	54.055	6.2		2
FALSE	Medium	Master Protein	Q0VF96	Cingulin-like protein 1 OS=Homo sapiens GN=CGNL1 PE=1 SV=2	0.0137694	2.20688	0.844854	1	2	1	1	1302	148.989	5.67		2
FALSE	Medium	Master Protein	Q96ME1	F-box/LRR-repeat protein 18 OS=Homo sapiens GN=FBXL18 PE=1 SV=2	0.0235588	1.86838	1.36646	1	2	1	1	805	88.284	8.32		2
FALSE	Medium	Master Protein	Q9P209	Centrosomal protein of 72 kDa OS=Homo sapiens GN=CEP72 PE=1 SV=2	0.0336317	1.7167	1.39104	1	2	1	1	647	71.673	6.52		2
FALSE	Low	Master Protein	Q3T8J9	GON-4-like protein OS=Homo sapiens GN=GON4L PE=1 SV=1	0.0541303	1.44009	0.803213	1	2	1	1	2241	248.465	5.01		2
FALSE	Low	Master Protein	Q9UKZ4	Teneurin-1 OS=Homo sapiens GN=TENM1 PE=1 SV=2	0.0556553	1.43016	0.256881	1	2	1	1	2725	304.817	6.42		2
FALSE	Low	Master Protein	Q14781	Chromobox protein homolog 2 OS=Homo sapiens GN=CBX2 PE=1 SV=2	0.0628485	1.36101	1.31579	1	2	1	1	532	56.046	10.01		2
FALSE	Low	Master Protein	Q13126	S-methyl-5'-thioadenosine phosphorylase OS=Homo sapiens GN=MTAP PE=1 SV=2	0.0754057	1.26922	3.53357	1	2	1	1	283	31.216	7.18		2
FALSE	High	Master Protein	Q9H7D7	WD repeat-containing protein 26 OS=Homo sapiens GN=WDR26 PE=1 SV=3	0	7.88639	2.87443	1	1	1	1	661	72.079	6.16		1
FALSE	High	Master Protein	P20290	Transcription factor BTF3 OS=Homo sapiens GN=BTF3 PE=1 SV=1	0.000434028	7.80079	9.2233	1	1	1	1	206	22.154	9.38		1
FALSE	High	Master Protein	O95208	Epsin-2 OS=Homo sapiens GN=EPN2 PE=1 SV=3	0.000761905	6.7765	2.65211	1	1	1	1	641	68.439	7.52		1
FALSE	High	Master Protein	Q96IZ0	PRKC apoptosis WT1 regulator protein OS=Homo sapiens GN=PAWR PE=1 SV=1	0.000761905	6.70377	4.70588	1	1	1	1	340	36.545	5.41		1
FALSE	High	Master Protein	Q9NVF7	F-box only protein 28 OS=Homo sapiens GN=FBXO28 PE=1 SV=1	0.000761905	6.50018	3.80435	1	1	1	1	368	41.123	9.55		1
FALSE	High	Master Protein	Q9C0B9	Zinc finger CCHC domain-containing protein 2 OS=Homo sapiens GN=ZCCHC2 PE=1 SV=6	0.000761905	6.18475	1.27334	1	1	1	1	1178	125.858	7.01		1
FALSE	High	Master Protein	O43159	Ribosomal RNA-processing protein 8 OS=Homo sapiens GN=RRP8 PE=1 SV=2	0.000761905	6.12459	3.50877	1	1	1	1	456	50.683	9.42		1
FALSE	High	Master Protein	P00750	Tissue-type plasminogen activator OS=Homo sapiens GN=PLAT PE=1 SV=1	0.000761905	5.80632	2.84698	1	1	1	1	562	62.876	7.8		1
FALSE	High	Master Protein	Q8ND76	Cyclin-Y OS=Homo sapiens GN=CCNY PE=1 SV=2	0.000761905	5.73119	4.98534	1	1	1	1	341	39.312	7.2		1
FALSE	High	Master Protein	P50897	Palmitoyl-protein thioesterase 1 OS=Homo sapiens GN=PPT1 PE=1 SV=1	0.000761905	5.59176	4.90196	1	1	1	1	306	34.171	6.52		1
FALSE	High	Master Protein	Q9HBE1	POZ-, AT hook-, and zinc finger-containing protein 1 OS=Homo sapiens GN=PATZ1 PE=1 SV=1	0.000761905	5.58855	1.89229	1	1	1	1	687	74.013	8.35		1
FALSE	High	Master Protein	Q86VS8	Protein Hook homolog 3 OS=Homo sapiens GN=HOOK3 PE=1 SV=2	0.000761905	5.51485	1.81058	1	1	1	1	718	83.074	5.17		1
FALSE	High	Master Protein	P04156	Major prion protein OS=Homo sapiens GN=PRNP PE=1 SV=1	0.000761905	5.47625	4.74308	1	1	1	1	253	27.643	9		1
FALSE	High	Master Protein	Q2TAM9	Tumor suppressor candidate gene 1 protein OS=Homo sapiens GN=TUSC1 PE=1 SV=3	0.000761905	5.44965	6.13208	1	1	1	1	212	23.376	11.18		1
FALSE	High	Master Protein	O96028	Histone-lysine N-methyltransferase NSD2 OS=Homo sapiens GN=WHSC1 PE=1 SV=1	0.000761905	5.4443	0.952381	1	1	1	1	1365	152.16	8.69		1
FALSE	High	Master Protein	O00461	Golgi integral membrane protein 4 OS=Homo sapiens GN=GOLIM4 PE=1 SV=1	0.000761905	5.34409	2.01149	1	1	1	1	696	81.831	4.77		1
FALSE	High	Master Protein	Q15776	Zinc finger protein with KRAB and SCAN domains 8 OS=Homo sapiens GN=ZKSCAN8 PE=1 SV=2	0.000761905	5.30242	2.24913	1	1	1	1	578	65.775	7.39		1
FALSE	High	Master Protein	O95619	YEATS domain-containing protein 4 OS=Homo sapiens GN=YEATS4 PE=1 SV=1	0.000761905	5.21375	6.60793	1	1	1	1	227	26.483	8.41		1
FALSE	High	Master Protein	Q7Z5J4	Retinoic acid-induced protein 1 OS=Homo sapiens GN=RAI1 PE=1 SV=2	0.000761905	5.18522	1.46905	1	1	1	1	1906	203.225	8.79		1
FALSE	High	Master Protein	Q8TAP8	Protein phosphatase 1 regulatory subunit 35 OS=Homo sapiens GN=PPP1R35 PE=1 SV=1	0.00110742	5.09109	8.69565	1	1	1	1	253	27.936	8.68		1
FALSE	High	Master Protein	Q14320	Protein FAM50A OS=Homo sapiens GN=FAM50A PE=1 SV=2	0.00110742	5.08171	3.83481	1	1	1	1	339	40.216	6.83		1
FALSE	High	Master Protein	Q709F0	Acyl-CoA dehydrogenase family member 11 OS=Homo sapiens GN=ACAD11 PE=1 SV=2	0.00110742	5.02961	1.53846	1	1	1	1	780	87.228	8.12		1
FALSE	High	Master Protein	Q8TBB5	Kelch domain-containing protein 4 OS=Homo sapiens GN=KLHDC4 PE=1 SV=1	0.00110742	4.99568	2.5	1	1	1	1	520	57.855	5.72		1
FALSE	High	Master Protein	Q15050	Ribosome biogenesis regulatory protein homolog OS=Homo sapiens GN=RRS1 PE=1 SV=2	0.00110742	4.97306	4.65753	1	1	1	1	365	41.168	10.7		1
FALSE	High	Master Protein	Q5BJH7	Protein YIF1B OS=Homo sapiens GN=YIF1B PE=1 SV=1	0.00110742	4.97184	4.14013	1	1	1	1	314	34.413	9.16		1
FALSE	High	Master Protein	P53801	Pituitary tumor-transforming gene 1 protein-interacting protein OS=Homo sapiens GN=PTTG1IP PE=1 SV=1	0.00110742	4.96658	6.66667	1	1	1	1	180	20.31	8.79		1
FALSE	High	Master Protein	P23381	Tryptophan--tRNA ligase, cytoplasmic OS=Homo sapiens GN=WARS PE=1 SV=2	0.00110742	4.93629	3.39703	1	1	1	1	471	53.132	6.23		1
FALSE	High	Master Protein	P55854	Small ubiquitin-related modifier 3 OS=Homo sapiens GN=SUMO3 PE=1 SV=2	0.00110742	4.90588	11.6505	1	1	1	1	103	11.63	5.49		1
FALSE	High	Master Protein	Q8N0Z3	Spindle and centriole-associated protein 1 OS=Homo sapiens GN=SPICE1 PE=1 SV=1	0.00110742	4.89963	1.40351	1	1	1	1	855	96.205	7.44		1
FALSE	High	Master Protein	Q7Z3B1	Neuronal growth regulator 1 OS=Homo sapiens GN=NEGR1 PE=1 SV=3	0.00110742	4.88739	3.67232	1	1	1	1	354	38.694	6.21		1
FALSE	High	Master Protein	Q6NS38	DNA oxidative demethylase ALKBH2 OS=Homo sapiens GN=ALKBH2 PE=1 SV=1	0.00143988	4.84558	5.36398	1	1	1	1	261	29.304	9.66		1
FALSE	High	Master Protein	Q9NV56	MRG/MORF4L-binding protein OS=Homo sapiens GN=MRGBP PE=1 SV=1	0.00143988	4.84073	6.37255	1	1	1	1	204	22.403	5.83		1
FALSE	High	Master Protein	Q9Y2B0	Protein canopy homolog 2 OS=Homo sapiens GN=CNPY2 PE=1 SV=1	0.00143988	4.82131	8.79121	1	1	1	1	182	20.639	4.92		1
FALSE	High	Master Protein	P20719	Homeobox protein Hox-A5 OS=Homo sapiens GN=HOXA5 PE=1 SV=2	0.00143988	4.77006	5.18519	1	1	1	1	270	29.327	9.25		1
FALSE	High	Master Protein	Q9H4Z2	Zinc finger protein 335 OS=Homo sapiens GN=ZNF335 PE=1 SV=1	0.00143988	4.74861	0.968703	1	1	1	1	1342	144.802	6.42		1
FALSE	High	Master Protein	Q92597	Protein NDRG1 OS=Homo sapiens GN=NDRG1 PE=1 SV=1	0.00143988	4.72102	3.5533	1	1	1	1	394	42.808	5.82		1
FALSE	High	Master Protein	Q9UK59	Lariat debranching enzyme OS=Homo sapiens GN=DBR1 PE=1 SV=2	0.00143988	4.66434	2.02206	1	1	1	1	544	61.516	5.47		1
FALSE	High	Master Protein	Q9NZL9	Methionine adenosyltransferase 2 subunit beta OS=Homo sapiens GN=MAT2B PE=1 SV=1	0.00143988	4.61601	3.59281	1	1	1	1	334	37.528	7.36		1
FALSE	High	Master Protein	P10599	Thioredoxin OS=Homo sapiens GN=TXN PE=1 SV=3	0.00143988	4.61547	12.381	1	1	1	1	105	11.73	4.92		1
FALSE	High	Master Protein	Q9UBT7	Alpha-catulin OS=Homo sapiens GN=CTNNAL1 PE=1 SV=2	0.00143988	4.58286	1.49864	1	1	1	1	734	81.845	6.64		1
FALSE	High	Master Protein	Q9BXS4	Transmembrane protein 59 OS=Homo sapiens GN=TMEM59 PE=1 SV=1	0.00178699	4.51756	4.02477	1	1	1	1	323	36.2	5.1		1
FALSE	High	Master Protein	Q5SWX8	Protein odr-4 homolog OS=Homo sapiens GN=ODR4 PE=1 SV=1	0.00178699	4.51713	2.64317	1	1	1	1	454	51.071	5.92		1
FALSE	High	Master Protein	Q92995	Ubiquitin carboxyl-terminal hydrolase 13 OS=Homo sapiens GN=USP13 PE=1 SV=2	0.00178699	4.50376	1.27462	1	1	1	1	863	97.265	5.53		1
FALSE	High	Master Protein	Q96QE3	ATPase family AAA domain-containing protein 5 OS=Homo sapiens GN=ATAD5 PE=1 SV=4	0.00178699	4.4786	0.759219	1	1	1	1	1844	207.441	9.19		1
FALSE	High	Master Protein	Q5MIZ7	Serine/threonine-protein phosphatase 4 regulatory subunit 3B OS=Homo sapiens GN=PPP4R3B PE=1 SV=2	0.00208117	4.45112	1.41343	1	1	1	1	849	97.397	4.96		1
FALSE	High	Master Protein	Q86UK7	Zinc finger protein 598 OS=Homo sapiens GN=ZNF598 PE=1 SV=1	0.00208117	4.44418	1.43805	1	1	1	1	904	98.575	8.4		1
FALSE	High	Master Protein	Q99453	Paired mesoderm homeobox protein 2B OS=Homo sapiens GN=PHOX2B PE=1 SV=2	0.00208117	4.41896	3.18471	1	1	1	1	314	31.601	8.84		1
FALSE	High	Master Protein	Q03169	Tumor necrosis factor alpha-induced protein 2 OS=Homo sapiens GN=TNFAIP2 PE=2 SV=2	0.00208117	4.38902	2.75229	1	1	1	1	654	72.616	6.46		1
FALSE	High	Master Protein	Q9UHF1	Epidermal growth factor-like protein 7 OS=Homo sapiens GN=EGFL7 PE=1 SV=3	0.00208117	4.37862	4.7619	1	1	1	1	273	29.598	8.16		1
FALSE	High	Master Protein	Q96S59	Ran-binding protein 9 OS=Homo sapiens GN=RANBP9 PE=1 SV=1	0.00208117	4.36012	1.92044	1	1	1	1	729	77.798	6.79		1
FALSE	High	Master Protein	Q8N8D1	Programmed cell death protein 7 OS=Homo sapiens GN=PDCD7 PE=1 SV=1	0.00208117	4.27646	2.26804	1	1	1	1	485	54.666	9.95		1
FALSE	High	Master Protein	Q9H4M9	EH domain-containing protein 1 OS=Homo sapiens GN=EHD1 PE=1 SV=2	0.00208117	4.27287	2.24719	1	1	1	1	534	60.589	6.83		1
FALSE	High	Master Protein	Q9P2M7	Cingulin OS=Homo sapiens GN=CGN PE=1 SV=2	0.00208117	4.264	1.00251	1	1	1	1	1197	136.304	5.54		1
FALSE	High	Master Protein	O60573	Eukaryotic translation initiation factor 4E type 2 OS=Homo sapiens GN=EIF4E2 PE=1 SV=1	0.00208117	4.2081	4.08163	1	1	1	1	245	28.344	8.88		1
FALSE	High	Master Protein	O43353	Receptor-interacting serine/threonine-protein kinase 2 OS=Homo sapiens GN=RIPK2 PE=1 SV=2	0.00208117	4.18475	2.40741	1	1	1	1	540	61.156	7.09		1
FALSE	High	Master Protein	Q9H1Z4	WD repeat-containing protein 13 OS=Homo sapiens GN=WDR13 PE=1 SV=2	0.00208117	4.17483	2.26804	1	1	1	1	485	53.662	9.14		1
FALSE	High	Master Protein	O95721	Synaptosomal-associated protein 29 OS=Homo sapiens GN=SNAP29 PE=1 SV=1	0.00208117	4.15385	4.26357	1	1	1	1	258	28.953	5.81		1
FALSE	High	Master Protein	Q13405	39S ribosomal protein L49, mitochondrial OS=Homo sapiens GN=MRPL49 PE=1 SV=1	0.00208117	4.14661	8.43373	1	1	1	1	166	19.186	9.45		1
FALSE	High	Master Protein	P06310	Ig kappa chain V-II region RPMI 6410 OS=Homo sapiens PE=4 SV=1	0.00239808	4.07381	9.77444	1	1	1	1	133	14.697	9.25		1
FALSE	High	Master Protein	Q9Y320	Thioredoxin-related transmembrane protein 2 OS=Homo sapiens GN=TMX2 PE=1 SV=1	0.00239808	4.03829	4.05405	1	1	1	1	296	34.016	8.69		1
FALSE	High	Master Protein	Q9NVC6	Mediator of RNA polymerase II transcription subunit 17 OS=Homo sapiens GN=MED17 PE=1 SV=2	0.00239808	4.01583	1.68971	1	1	1	1	651	72.845	7.44		1
FALSE	High	Master Protein	Q13118	Krueppel-like factor 10 OS=Homo sapiens GN=KLF10 PE=1 SV=1	0.00239808	4.01403	3.33333	1	1	1	1	480	52.521	9.1		1
FALSE	High	Master Protein	O43752	Syntaxin-6 OS=Homo sapiens GN=STX6 PE=1 SV=1	0.00239808	4.01386	4.31373	1	1	1	1	255	29.158	4.93		1
FALSE	High	Master Protein	Q96IU4	Alpha/beta hydrolase domain-containing protein 14B OS=Homo sapiens GN=ABHD14B PE=1 SV=1	0.00239808	3.99957	4.7619	1	1	1	1	210	22.332	6.4		1
FALSE	High	Master Protein	Q9UID3	Vacuolar protein sorting-associated protein 51 homolog OS=Homo sapiens GN=VPS51 PE=1 SV=2	0.00307482	3.97716	1.91816	1	1	1	1	782	85.988	6.47		1
FALSE	High	Master Protein	Q6QNY0	Biogenesis of lysosome-related organelles complex 1 subunit 3 OS=Homo sapiens GN=BLOC1S3 PE=1 SV=1	0.00370246	3.945	7.92079	1	1	1	1	202	21.243	5.15		1
FALSE	High	Master Protein	Q9BV44	THUMP domain-containing protein 3 OS=Homo sapiens GN=THUMPD3 PE=1 SV=1	0.00370246	3.94386	2.16963	1	1	1	1	507	56.967	6.37		1
FALSE	High	Master Protein	Q96D71	RalBP1-associated Eps domain-containing protein 1 OS=Homo sapiens GN=REPS1 PE=1 SV=3	0.00370246	3.90833	2.01005	1	1	1	1	796	86.609	5.69		1
FALSE	High	Master Protein	Q9NW82	WD repeat-containing protein 70 OS=Homo sapiens GN=WDR70 PE=1 SV=1	0.00370246	3.90588	1.68196	1	1	1	1	654	73.155	6.33		1
FALSE	High	Master Protein	Q6VN20	Ran-binding protein 10 OS=Homo sapiens GN=RANBP10 PE=1 SV=1	0.00370246	3.90136	1.6129	1	1	1	1	620	67.214	6.77		1
FALSE	High	Master Protein	Q9Y221	60S ribosome subunit biogenesis protein NIP7 homolog OS=Homo sapiens GN=NIP7 PE=1 SV=1	0.00370246	3.86233	7.77778	1	1	1	1	180	20.449	8.51		1
FALSE	High	Master Protein	Q9H0E2	Toll-interacting protein OS=Homo sapiens GN=TOLLIP PE=1 SV=1	0.004329	3.83091	5.10949	1	1	1	1	274	30.262	5.97		1
FALSE	High	Master Protein	Q15025	TNFAIP3-interacting protein 1 OS=Homo sapiens GN=TNIP1 PE=1 SV=2	0.004329	3.82798	2.04403	1	1	1	1	636	71.82	6.62		1
FALSE	High	Master Protein	O95169	NADH dehydrogenase [ubiquinone] 1 beta subcomplex subunit 8, mitochondrial OS=Homo sapiens GN=NDUFB8 PE=1 SV=1	0.004329	3.80688	5.91398	1	1	1	1	186	21.751	6.8		1
FALSE	High	Master Protein	Q9BSJ6	Protein FAM64A OS=Homo sapiens GN=FAM64A PE=1 SV=1	0.004329	3.79425	6.85484	1	1	1	1	248	27.463	10.21		1
FALSE	High	Master Protein	Q9UL03	Integrator complex subunit 6 OS=Homo sapiens GN=INTS6 PE=1 SV=1	0.004329	3.79398	1.35287	1	1	1	1	887	100.326	8.62		1
FALSE	High	Master Protein	Q14738	Serine/threonine-protein phosphatase 2A 56 kDa regulatory subunit delta isoform OS=Homo sapiens GN=PPP2R5D PE=1 SV=1	0.004329	3.77032	2.15947	1	1	1	1	602	69.947	8.13		1
FALSE	High	Master Protein	Q9Y2G8	DnaJ homolog subfamily C member 16 OS=Homo sapiens GN=DNAJC16 PE=2 SV=3	0.0049456	3.75597	1.27877	1	1	1	1	782	90.534	7.12		1
FALSE	High	Master Protein	O15397	Importin-8 OS=Homo sapiens GN=IPO8 PE=1 SV=2	0.0049456	3.75301	1.15718	1	1	1	1	1037	119.861	5.16		1
FALSE	High	Master Protein	Q9BZG1	Ras-related protein Rab-34 OS=Homo sapiens GN=RAB34 PE=1 SV=1	0.0049456	3.72769	5.40541	1	1	1	1	259	29.026	7.88		1
FALSE	High	Master Protein	O14602	Eukaryotic translation initiation factor 1A, Y-chromosomal OS=Homo sapiens GN=EIF1AY PE=1 SV=4	0.0049456	3.71919	11.1111	1	1	1	1	144	16.432	5.24		1
FALSE	High	Master Protein	Q9UL25	Ras-related protein Rab-21 OS=Homo sapiens GN=RAB21 PE=1 SV=3	0.0049456	3.71309	4.88889	1	1	1	1	225	24.332	7.94		1
FALSE	High	Master Protein	P12429	Annexin A3 OS=Homo sapiens GN=ANXA3 PE=1 SV=3	0.0049456	3.71108	3.40557	1	1	1	1	323	36.353	5.92		1
FALSE	High	Master Protein	Q16594	Transcription initiation factor TFIID subunit 9 OS=Homo sapiens GN=TAF9 PE=1 SV=1	0.0049456	3.69058	3.78788	1	1	1	1	264	28.956	8.66		1
FALSE	High	Master Protein	Q96MX3	Zinc finger protein 48 OS=Homo sapiens GN=ZNF48 PE=1 SV=2	0.0049456	3.67346	1.94175	1	1	1	1	618	67.777	9.36		1
FALSE	High	Master Protein	Q15022	Polycomb protein SUZ12 OS=Homo sapiens GN=SUZ12 PE=1 SV=3	0.00520325	3.65975	1.35318	1	1	1	1	739	83.003	8.81		1
FALSE	High	Master Protein	Q8N5F7	NF-kappa-B-activating protein OS=Homo sapiens GN=NKAP PE=1 SV=1	0.00520325	3.65956	2.40964	1	1	1	1	415	47.11	10.11		1
FALSE	High	Master Protein	Q9BZD4	Kinetochore protein Nuf2 OS=Homo sapiens GN=NUF2 PE=1 SV=2	0.00520325	3.64493	2.15517	1	1	1	1	464	54.269	8.27		1
FALSE	High	Master Protein	O60479	Homeobox protein DLX-3 OS=Homo sapiens GN=DLX3 PE=2 SV=1	0.00520325	3.62838	4.52962	1	1	1	1	287	31.719	8.92		1
FALSE	High	Master Protein	O94887	FERM, RhoGEF and pleckstrin domain-containing protein 2 OS=Homo sapiens GN=FARP2 PE=1 SV=3	0.00520325	3.59142	0.85389	1	1	1	1	1054	119.813	8.79		1
FALSE	High	Master Protein	Q96L58	Beta-1,3-galactosyltransferase 6 OS=Homo sapiens GN=B3GALT6 PE=1 SV=2	0.00520325	3.56479	3.95137	1	1	1	1	329	37.114	9.66		1
FALSE	High	Master Protein	P17020	Zinc finger protein 16 OS=Homo sapiens GN=ZNF16 PE=1 SV=3	0.00520325	3.55627	1.6129	1	1	1	1	682	76.422	7.97		1
FALSE	High	Master Protein	P06702	Protein S100-A9 OS=Homo sapiens GN=S100A9 PE=1 SV=1	0.00520325	3.54607	13.1579	1	1	1	1	114	13.234	6.13		1
FALSE	High	Master Protein	Q9BV38	WD repeat-containing protein 18 OS=Homo sapiens GN=WDR18 PE=1 SV=2	0.00520325	3.54516	2.5463	1	1	1	1	432	47.375	6.7		1
FALSE	High	Master Protein	Q9UHR4	Brain-specific angiogenesis inhibitor 1-associated protein 2-like protein 1 OS=Homo sapiens GN=BAIAP2L1 PE=1 SV=2	0.00520325	3.54197	1.95695	1	1	1	1	511	56.847	8.68		1
FALSE	High	Master Protein	Q9Y5Y2	Cytosolic Fe-S cluster assembly factor NUBP2 OS=Homo sapiens GN=NUBP2 PE=1 SV=1	0.00520325	3.52871	3.32103	1	1	1	1	271	28.807	5.83		1
FALSE	High	Master Protein	O75061	Putative tyrosine-protein phosphatase auxilin OS=Homo sapiens GN=DNAJC6 PE=1 SV=3	0.00520325	3.50059	1.31435	1	1	1	1	913	99.933	7.25		1
FALSE	High	Master Protein	O14641	Segment polarity protein dishevelled homolog DVL-2 OS=Homo sapiens GN=DVL2 PE=1 SV=1	0.00544	3.47965	1.63043	1	1	1	1	736	78.899	6.02		1
FALSE	High	Master Protein	P30740	Leukocyte elastase inhibitor OS=Homo sapiens GN=SERPINB1 PE=1 SV=1	0.00544	3.47534	2.37467	1	1	1	1	379	42.715	6.28		1
FALSE	High	Master Protein	Q9H3M7	Thioredoxin-interacting protein OS=Homo sapiens GN=TXNIP PE=1 SV=1	0.00544	3.47057	3.06905	1	1	1	1	391	43.633	7.5		1
FALSE	High	Master Protein	Q9UPR3	Protein SMG5 OS=Homo sapiens GN=SMG5 PE=1 SV=3	0.00544	3.45917	1.08268	1	1	1	1	1016	113.855	5.91		1
FALSE	High	Master Protein	Q16543	Hsp90 co-chaperone Cdc37 OS=Homo sapiens GN=CDC37 PE=1 SV=1	0.00544	3.45223	2.38095	1	1	1	1	378	44.44	5.25		1
FALSE	High	Master Protein	P53582	Methionine aminopeptidase 1 OS=Homo sapiens GN=METAP1 PE=1 SV=2	0.00544	3.45014	2.84974	1	1	1	1	386	43.187	7.17		1
FALSE	High	Master Protein	Q8WUY9	DEP domain-containing protein 1B OS=Homo sapiens GN=DEPDC1B PE=1 SV=2	0.00544	3.43783	2.26843	1	1	1	1	529	61.731	8.85		1
FALSE	High	Master Protein	Q5HYI7	Metaxin-3 OS=Homo sapiens GN=MTX3 PE=1 SV=2	0.00544	3.4142	3.20513	1	1	1	1	312	35.071	7.8		1
FALSE	High	Master Protein	Q9Y6N5	Sulfide:quinone oxidoreductase, mitochondrial OS=Homo sapiens GN=SQRDL PE=1 SV=1	0.00544	3.39903	3.11111	1	1	1	1	450	49.929	9.11		1
FALSE	High	Master Protein	Q96P63	Serpin B12 OS=Homo sapiens GN=SERPINB12 PE=1 SV=1	0.00544	3.36452	3.95062	1	1	1	1	405	46.247	5.53		1
FALSE	High	Master Protein	Q9Y388	RNA-binding motif protein, X-linked 2 OS=Homo sapiens GN=RBMX2 PE=1 SV=2	0.00544	3.35468	3.72671	1	1	1	1	322	37.313	9.83		1
FALSE	High	Master Protein	Q9H8X2	Inositol-pentakisphosphate 2-kinase OS=Homo sapiens GN=IPPK PE=1 SV=1	0.00544	3.34525	2.85132	1	1	1	1	491	55.98	8.37		1
FALSE	High	Master Protein	P50552	Vasodilator-stimulated phosphoprotein OS=Homo sapiens GN=VASP PE=1 SV=3	0.00544	3.34525	3.42105	1	1	1	1	380	39.805	8.94		1
FALSE	High	Master Protein	Q96AX1	Vacuolar protein sorting-associated protein 33A OS=Homo sapiens GN=VPS33A PE=1 SV=1	0.00544	3.33339	1.84564	1	1	1	1	596	67.568	6.96		1
FALSE	High	Master Protein	Q9UBW8	COP9 signalosome complex subunit 7a OS=Homo sapiens GN=COPS7A PE=1 SV=1	0.00571973	3.31641	5.09091	1	1	1	1	275	30.258	8.22		1
FALSE	High	Master Protein	Q15102	Platelet-activating factor acetylhydrolase IB subunit gamma OS=Homo sapiens GN=PAFAH1B3 PE=1 SV=1	0.00571973	3.31238	3.8961	1	1	1	1	231	25.718	6.84		1
FALSE	High	Master Protein	Q9BS40	Latexin OS=Homo sapiens GN=LXN PE=1 SV=2	0.00571973	3.27712	4.05405	1	1	1	1	222	25.734	5.78		1
FALSE	High	Master Protein	P32780	General transcription factor IIH subunit 1 OS=Homo sapiens GN=GTF2H1 PE=1 SV=1	0.00571973	3.26408	1.64234	1	1	1	1	548	61.993	8.66		1
FALSE	High	Master Protein	Q9HCD6	Protein TANC2 OS=Homo sapiens GN=TANC2 PE=1 SV=3	0.00571973	3.23314	0.753769	1	1	1	1	1990	219.512	8.07		1
FALSE	High	Master Protein	Q7LBR1	Charged multivesicular body protein 1b OS=Homo sapiens GN=CHMP1B PE=1 SV=1	0.00571973	3.22856	4.52261	1	1	1	1	199	22.095	8.1		1
FALSE	High	Master Protein	P11498	Pyruvate carboxylase, mitochondrial OS=Homo sapiens GN=PC PE=1 SV=2	0.00600506	3.2156	1.27334	1	1	1	1	1178	129.551	6.84		1
FALSE	High	Master Protein	Q8N9N2	Activating signal cointegrator 1 complex subunit 1 OS=Homo sapiens GN=ASCC1 PE=1 SV=1	0.00600506	3.21226	2.25	1	1	1	1	400	45.481	5.54		1
FALSE	High	Master Protein	Q9Y4W2	Ribosomal biogenesis protein LAS1L OS=Homo sapiens GN=LAS1L PE=1 SV=2	0.00600506	3.19037	1.22616	1	1	1	1	734	83.013	4.73		1
FALSE	High	Master Protein	Q9Y6X9	MORC family CW-type zinc finger protein 2 OS=Homo sapiens GN=MORC2 PE=1 SV=2	0.00600506	3.18662	0.872093	1	1	1	1	1032	117.75	8.38		1
FALSE	High	Master Protein	Q96H12	Myb/SANT-like DNA-binding domain-containing protein 3 OS=Homo sapiens GN=MSANTD3 PE=1 SV=1	0.00627549	3.18376	4	1	1	1	1	275	32.342	8.37		1
FALSE	High	Master Protein	O14734	Acyl-coenzyme A thioesterase 8 OS=Homo sapiens GN=ACOT8 PE=1 SV=1	0.00627549	3.17934	2.82132	1	1	1	1	319	35.891	7.56		1
FALSE	High	Master Protein	O95671	N-acetylserotonin O-methyltransferase-like protein OS=Homo sapiens GN=ASMTL PE=1 SV=3	0.00627549	3.14801	1.44928	1	1	1	1	621	68.813	6.07		1
FALSE	High	Master Protein	Q8N9R8	Protein SCAI OS=Homo sapiens GN=SCAI PE=1 SV=2	0.00627549	3.14279	1.65017	1	1	1	1	606	70.355	8.6		1
FALSE	High	Master Protein	Q9H061	Transmembrane protein 126A OS=Homo sapiens GN=TMEM126A PE=1 SV=1	0.00627549	3.13835	4.61538	1	1	1	1	195	21.513	9.26		1
FALSE	High	Master Protein	Q9H300	Presenilins-associated rhomboid-like protein, mitochondrial OS=Homo sapiens GN=PARL PE=1 SV=2	0.00627549	3.11993	2.37467	1	1	1	1	379	42.163	9.79		1
FALSE	High	Master Protein	Q86Y07	Serine/threonine-protein kinase VRK2 OS=Homo sapiens GN=VRK2 PE=1 SV=3	0.00654818	3.08884	2.55906	1	1	1	1	508	58.104	8.84		1
FALSE	High	Master Protein	Q9H269	Vacuolar protein sorting-associated protein 16 homolog OS=Homo sapiens GN=VPS16 PE=1 SV=2	0.00654818	3.07526	1.78784	1	1	1	1	839	94.634	6.77		1
FALSE	High	Master Protein	Q6ZVX7	F-box only protein 50 OS=Homo sapiens GN=NCCRP1 PE=1 SV=1	0.00654818	3.07319	3.27273	1	1	1	1	275	30.828	6.62		1
FALSE	High	Master Protein	Q8WUH6	Transmembrane protein 263 OS=Homo sapiens GN=TMEM263 PE=1 SV=1	0.00654818	3.06748	8.62069	1	1	1	1	116	11.741	9.32		1
FALSE	High	Master Protein	Q9C086	INO80 complex subunit B OS=Homo sapiens GN=INO80B PE=1 SV=2	0.00654818	3.06434	2.52809	1	1	1	1	356	38.613	9.61		1
FALSE	High	Master Protein	Q8N5L8	Ribonuclease P protein subunit p25-like protein OS=Homo sapiens GN=RPP25L PE=1 SV=1	0.00654818	3.05705	5.52147	1	1	1	1	163	17.62	10.3		1
FALSE	High	Master Protein	Q13136	Liprin-alpha-1 OS=Homo sapiens GN=PPFIA1 PE=1 SV=1	0.00678384	3.0447	1.24792	1	1	1	1	1202	135.695	6.29		1
FALSE	High	Master Protein	Q8N5U6	RING finger protein 10 OS=Homo sapiens GN=RNF10 PE=1 SV=2	0.00678384	3.03754	1.35635	1	1	1	1	811	89.871	6.92		1
FALSE	High	Master Protein	Q99728	BRCA1-associated RING domain protein 1 OS=Homo sapiens GN=BARD1 PE=1 SV=2	0.00678384	3.02757	1.1583	1	1	1	1	777	86.593	8.72		1
FALSE	High	Master Protein	P24863	Cyclin-C OS=Homo sapiens GN=CCNC PE=1 SV=2	0.00678384	3.02356	3.88693	1	1	1	1	283	33.221	7.33		1
FALSE	High	Master Protein	Q9H0K1	Serine/threonine-protein kinase SIK2 OS=Homo sapiens GN=SIK2 PE=1 SV=1	0.00678384	3.01002	1.1879	1	1	1	1	926	103.849	6.02		1
FALSE	High	Master Protein	Q9NWZ8	Gem-associated protein 8 OS=Homo sapiens GN=GEMIN8 PE=1 SV=1	0.00678384	2.99827	3.71901	1	1	1	1	242	28.619	6.8		1
FALSE	High	Master Protein	Q14596	Next to BRCA1 gene 1 protein OS=Homo sapiens GN=NBR1 PE=1 SV=3	0.00678384	2.99525	0.931677	1	1	1	1	966	107.346	5.12		1
FALSE	High	Master Protein	Q96S97	Myeloid-associated differentiation marker OS=Homo sapiens GN=MYADM PE=1 SV=2	0.00678384	2.98005	3.10559	1	1	1	1	322	35.25	8.15		1
FALSE	High	Master Protein	O15049	NEDD4-binding protein 3 OS=Homo sapiens GN=N4BP3 PE=1 SV=3	0.00678384	2.96778	2.20588	1	1	1	1	544	60.433	8.1		1
FALSE	High	Master Protein	Q9NRA8	Eukaryotic translation initiation factor 4E transporter OS=Homo sapiens GN=EIF4ENIF1 PE=1 SV=2	0.00678384	2.96778	1.11675	1	1	1	1	985	108.134	8.32		1
FALSE	High	Master Protein	Q13888	General transcription factor IIH subunit 2 OS=Homo sapiens GN=GTF2H2 PE=1 SV=1	0.00678384	2.96457	2.27848	1	1	1	1	395	44.39	6.76		1
FALSE	High	Master Protein	Q7Z7C8	Transcription initiation factor TFIID subunit 8 OS=Homo sapiens GN=TAF8 PE=1 SV=1	0.00678384	2.94157	5.16129	1	1	1	1	310	34.241	6.46		1
FALSE	High	Master Protein	Q9UPT9	Ubiquitin carboxyl-terminal hydrolase 22 OS=Homo sapiens GN=USP22 PE=1 SV=2	0.00708564	2.92665	1.90476	1	1	1	1	525	59.921	8.05		1
FALSE	High	Master Protein	Q8N8A6	ATP-dependent RNA helicase DDX51 OS=Homo sapiens GN=DDX51 PE=1 SV=3	0.00708564	2.92518	2.25225	1	1	1	1	666	72.413	8.16		1
FALSE	High	Master Protein	O14524	Nuclear envelope integral membrane protein 1 OS=Homo sapiens GN=NEMP1 PE=1 SV=2	0.00737101	2.90974	1.8018	1	1	1	1	444	50.607	6.93		1
FALSE	High	Master Protein	Q10713	Mitochondrial-processing peptidase subunit alpha OS=Homo sapiens GN=PMPCA PE=1 SV=2	0.00737101	2.90518	1.71429	1	1	1	1	525	58.216	6.92		1
FALSE	High	Master Protein	P68871	Hemoglobin subunit beta OS=Homo sapiens GN=HBB PE=1 SV=2	0.00737101	2.90344	8.84354	1	1	1	1	147	15.988	7.28		1
FALSE	High	Master Protein	P0DME0	Protein SETSIP OS=Homo sapiens GN=SETSIP PE=1 SV=1	0.00758035	2.88673	3.31126	1	1	1	1	302	34.861	4.31		1
FALSE	High	Master Protein	Q9Y6M4	Casein kinase I isoform gamma-3 OS=Homo sapiens GN=CSNK1G3 PE=1 SV=2	0.00758035	2.85418	2.01342	1	1	1	1	447	51.356	9.22		1
FALSE	High	Master Protein	Q9Y2K7	Lysine-specific demethylase 2A OS=Homo sapiens GN=KDM2A PE=1 SV=3	0.00758035	2.83714	1.0327	1	1	1	1	1162	132.708	7.58		1
FALSE	High	Master Protein	O00330	Pyruvate dehydrogenase protein X component, mitochondrial OS=Homo sapiens GN=PDHX PE=1 SV=3	0.00758035	2.83091	1.79641	1	1	1	1	501	54.089	8.66		1
FALSE	High	Master Protein	O43815	Striatin OS=Homo sapiens GN=STRN PE=1 SV=4	0.00758035	2.83091	1.41026	1	1	1	1	780	86.079	5.27		1
FALSE	High	Master Protein	Q6PI78	Transmembrane protein 65 OS=Homo sapiens GN=TMEM65 PE=1 SV=2	0.00758035	2.82074	4.58333	1	1	1	1	240	25.481	8.6		1
FALSE	High	Master Protein	Q92843	Bcl-2-like protein 2 OS=Homo sapiens GN=BCL2L2 PE=1 SV=2	0.00758035	2.80743	5.18135	1	1	1	1	193	20.733	5.34		1
FALSE	High	Master Protein	Q8N5I2	Arrestin domain-containing protein 1 OS=Homo sapiens GN=ARRDC1 PE=1 SV=1	0.00758035	2.8066	3.23326	1	1	1	1	433	45.953	7.02		1
FALSE	High	Master Protein	Q9NP79	Vacuolar protein sorting-associated protein VTA1 homolog OS=Homo sapiens GN=VTA1 PE=1 SV=1	0.00786449	2.77573	2.60586	1	1	1	1	307	33.858	6.29		1
FALSE	High	Master Protein	P49593	Protein phosphatase 1F OS=Homo sapiens GN=PPM1F PE=1 SV=3	0.00845411	2.74041	2.20264	1	1	1	1	454	49.8	5.1		1
FALSE	High	Master Protein	Q00688	Peptidyl-prolyl cis-trans isomerase FKBP3 OS=Homo sapiens GN=FKBP3 PE=1 SV=1	0.0086593	2.71783	3.57143	1	1	1	1	224	25.161	9.28		1
FALSE	High	Master Protein	Q6XQN6	Nicotinate phosphoribosyltransferase OS=Homo sapiens GN=NAPRT PE=1 SV=2	0.0086593	2.70049	1.67286	1	1	1	1	538	57.542	5.68		1
FALSE	High	Master Protein	P19838	Nuclear factor NF-kappa-B p105 subunit OS=Homo sapiens GN=NFKB1 PE=1 SV=2	0.0086593	2.69832	0.826446	1	1	1	1	968	105.29	5.4		1
FALSE	High	Master Protein	Q15334	Lethal(2) giant larvae protein homolog 1 OS=Homo sapiens GN=LLGL1 PE=1 SV=3	0.0086593	2.68235	1.2218	1	1	1	1	1064	115.346	6.29		1
FALSE	High	Master Protein	Q15906	Vacuolar protein sorting-associated protein 72 homolog OS=Homo sapiens GN=VPS72 PE=1 SV=1	0.0086593	2.65738	2.1978	1	1	1	1	364	40.57	6.48		1
FALSE	High	Master Protein	O75787	Renin receptor OS=Homo sapiens GN=ATP6AP2 PE=1 SV=2	0.0086593	2.64245	3.14286	1	1	1	1	350	38.983	6.1		1
FALSE	High	Master Protein	P13987	CD59 glycoprotein OS=Homo sapiens GN=CD59 PE=1 SV=1	0.0086593	2.62838	9.375	1	1	1	1	128	14.168	6.48		1
FALSE	High	Master Protein	Q96CP7	Calfacilitin OS=Homo sapiens GN=TLCD1 PE=2 SV=1	0.0086593	2.62672	3.23887	1	1	1	1	247	28.529	9.47		1
FALSE	High	Master Protein	Q8NDD1	Uncharacterized protein C1orf131 OS=Homo sapiens GN=C1orf131 PE=1 SV=3	0.0086593	2.6005	2.72109	1	1	1	1	294	32.746	9.92		1
FALSE	High	Master Protein	Q8WUQ7	Cactin OS=Homo sapiens GN=CACTIN PE=1 SV=3	0.0086593	2.59295	1.97889	1	1	1	1	758	88.648	9.14		1
FALSE	High	Master Protein	P51948	CDK-activating kinase assembly factor MAT1 OS=Homo sapiens GN=MNAT1 PE=1 SV=1	0.00980101	2.5743	2.589	1	1	1	1	309	35.8	6.09		1
FALSE	High	Master Protein	O95251	Histone acetyltransferase KAT7 OS=Homo sapiens GN=KAT7 PE=1 SV=1	0.00980101	2.537	2.12766	1	1	1	1	611	70.598	8.85		1
FALSE	High	Master Protein	Q9H3K2	Growth hormone-inducible transmembrane protein OS=Homo sapiens GN=GHITM PE=1 SV=2	0.00980101	2.5318	3.18841	1	1	1	1	345	37.181	9.94		1
FALSE	High	Master Protein	Q8TF76	Serine/threonine-protein kinase haspin OS=Homo sapiens GN=GSG2 PE=1 SV=3	0.00980101	2.51971	2.00501	1	1	1	1	798	88.44	9.16		1
FALSE	Medium	Master Protein	Q8N6H7	ADP-ribosylation factor GTPase-activating protein 2 OS=Homo sapiens GN=ARFGAP2 PE=1 SV=1	0.0100621	2.50948	1.91939	1	1	1	1	521	56.685	7.99		1
FALSE	Medium	Master Protein	P15408	Fos-related antigen 2 OS=Homo sapiens GN=FOSL2 PE=1 SV=1	0.0100621	2.50459	3.68098	1	1	1	1	326	35.172	7.49		1
FALSE	Medium	Master Protein	Q9NW38	E3 ubiquitin-protein ligase FANCL OS=Homo sapiens GN=FANCL PE=1 SV=2	0.0100621	2.50404	2.13333	1	1	1	1	375	42.877	6.46		1
FALSE	Medium	Master Protein	Q92560	Ubiquitin carboxyl-terminal hydrolase BAP1 OS=Homo sapiens GN=BAP1 PE=1 SV=2	0.0100621	2.50114	1.64609	1	1	1	1	729	80.312	6.84		1
FALSE	Medium	Master Protein	Q96DF8	Protein DGCR14 OS=Homo sapiens GN=DGCR14 PE=1 SV=1	0.0100621	2.50045	3.57143	1	1	1	1	476	52.536	7.56		1
FALSE	Medium	Master Protein	P07858	Cathepsin B OS=Homo sapiens GN=CTSB PE=1 SV=3	0.0103306	2.49485	2.35988	1	1	1	1	339	37.797	6.3		1
FALSE	Medium	Master Protein	Q9NRN7	L-aminoadipate-semialdehyde dehydrogenase-phosphopantetheinyl transferase OS=Homo sapiens GN=AASDHPPT PE=1 SV=2	0.0103306	2.48572	2.589	1	1	1	1	309	35.753	6.8		1
FALSE	Medium	Master Protein	P56377	AP-1 complex subunit sigma-2 OS=Homo sapiens GN=AP1S2 PE=1 SV=1	0.0106226	2.46231	5.73248	1	1	1	1	157	18.603	5.47		1
FALSE	Medium	Master Protein	Q9UHQ9	NADH-cytochrome b5 reductase 1 OS=Homo sapiens GN=CYB5R1 PE=1 SV=1	0.01086	2.41885	2.95082	1	1	1	1	305	34.073	9.38		1
FALSE	Medium	Master Protein	Q13505	Metaxin-1 OS=Homo sapiens GN=MTX1 PE=1 SV=2	0.01086	2.4105	1.93133	1	1	1	1	466	51.445	9.79		1
FALSE	Medium	Master Protein	Q9UM13	Anaphase-promoting complex subunit 10 OS=Homo sapiens GN=ANAPC10 PE=1 SV=1	0.01086	2.40938	6.48649	1	1	1	1	185	21.239	9.06		1
FALSE	Medium	Master Protein	Q712K3	Ubiquitin-conjugating enzyme E2 R2 OS=Homo sapiens GN=UBE2R2 PE=1 SV=1	0.01086	2.39718	4.62185	1	1	1	1	238	27.149	4.42		1
FALSE	Medium	Master Protein	P49848	Transcription initiation factor TFIID subunit 6 OS=Homo sapiens GN=TAF6 PE=1 SV=1	0.01086	2.38934	1.4771	1	1	1	1	677	72.623	8.6		1
FALSE	Medium	Master Protein	Q9NRZ9	Lymphoid-specific helicase OS=Homo sapiens GN=HELLS PE=1 SV=1	0.0111241	2.38679	1.19332	1	1	1	1	838	97.012	7.93		1
FALSE	Medium	Master Protein	Q9BVQ7	Spermatogenesis-associated protein 5-like protein 1 OS=Homo sapiens GN=SPATA5L1 PE=1 SV=2	0.0111241	2.3808	1.59363	1	1	1	1	753	80.66	8.09		1
FALSE	Medium	Master Protein	P17481	Homeobox protein Hox-B8 OS=Homo sapiens GN=HOXB8 PE=2 SV=2	0.0111241	2.37685	5.34979	1	1	1	1	243	27.556	8.28		1
FALSE	Medium	Master Protein	Q9Y276	Mitochondrial chaperone BCS1 OS=Homo sapiens GN=BCS1L PE=1 SV=1	0.0111241	2.37008	2.38663	1	1	1	1	419	47.504	8.5		1
FALSE	Medium	Master Protein	P48507	Glutamate--cysteine ligase regulatory subunit OS=Homo sapiens GN=GCLM PE=1 SV=1	0.0113736	2.36522	4.74453	1	1	1	1	274	30.708	6.02		1
FALSE	Medium	Master Protein	Q93045	Stathmin-2 OS=Homo sapiens GN=STMN2 PE=1 SV=3	0.0116584	2.34467	5.02793	1	1	1	1	179	20.815	8.32		1
FALSE	Medium	Master Protein	P12081	Histidine--tRNA ligase, cytoplasmic OS=Homo sapiens GN=HARS PE=1 SV=2	0.0124746	2.33639	1.57171	1	1	1	1	509	57.374	5.88		1
FALSE	Medium	Master Protein	P42765	3-ketoacyl-CoA thiolase, mitochondrial OS=Homo sapiens GN=ACAA2 PE=1 SV=2	0.0124746	2.33115	2.267	1	1	1	1	397	41.898	8.09		1
FALSE	Medium	Master Protein	Q99871	HAUS augmin-like complex subunit 7 OS=Homo sapiens GN=HAUS7 PE=1 SV=3	0.0124746	2.29835	2.17391	1	1	1	1	368	40.752	4.83		1
FALSE	Medium	Master Protein	Q9Y4C4	Malignant fibrous histiocytoma-amplified sequence 1 OS=Homo sapiens GN=MFHAS1 PE=1 SV=2	0.0127573	2.28659	0.760456	1	1	1	1	1052	116.877	7.88		1
FALSE	Medium	Master Protein	Q9H116	GDNF-inducible zinc finger protein 1 OS=Homo sapiens GN=GZF1 PE=1 SV=1	0.0129608	2.28275	1.12518	1	1	1	1	711	80.441	7.87		1
FALSE	Medium	Master Protein	O14777	Kinetochore protein NDC80 homolog OS=Homo sapiens GN=NDC80 PE=1 SV=1	0.0129608	2.26986	1.24611	1	1	1	1	642	73.867	5.6		1
FALSE	Medium	Master Protein	Q6AI08	HEAT repeat-containing protein 6 OS=Homo sapiens GN=HEATR6 PE=1 SV=1	0.0129608	2.26954	1.01609	1	1	1	1	1181	128.699	7.03		1
FALSE	Medium	Master Protein	Q13065	G antigen 1 OS=Homo sapiens GN=GAGE1 PE=1 SV=2	0.0129608	2.26297	6.47482	1	1	1	1	139	15.6	4.44		1
FALSE	Medium	Master Protein	Q86WB0	Nuclear-interacting partner of ALK OS=Homo sapiens GN=ZC3HC1 PE=1 SV=1	0.0129608	2.2561	1.99203	1	1	1	1	502	55.226	5.62		1
FALSE	Medium	Master Protein	Q9NNX1	Tuftelin OS=Homo sapiens GN=TUFT1 PE=1 SV=1	0.0129608	2.25259	3.58974	1	1	1	1	390	44.237	6		1
FALSE	Medium	Master Protein	Q8TCY9	Up-regulator of cell proliferation OS=Homo sapiens GN=URGCP PE=1 SV=2	0.0134864	2.23995	0.859291	1	1	1	1	931	104.921	6.42		1
FALSE	Medium	Master Protein	Q8NFZ0	F-box DNA helicase 1 OS=Homo sapiens GN=FBXO18 PE=1 SV=2	0.0134864	2.22717	0.767018	1	1	1	1	1043	117.611	8.25		1
FALSE	Medium	Master Protein	Q29983	MHC class I polypeptide-related sequence A OS=Homo sapiens GN=MICA PE=1 SV=1	0.0134864	2.21645	2.34987	1	1	1	1	383	42.888	6.98		1
FALSE	Medium	Master Protein	Q5T1J5	Putative coiled-coil-helix-coiled-coil-helix domain-containing protein CHCHD2P9, mitochondrial OS=Homo sapiens GN=CHCHD2P9 PE=5 SV=1	0.0134864	2.21304	18.543	1	1	1	1	151	15.48	9.89		1
FALSE	Medium	Master Protein	Q9P0U3	Sentrin-specific protease 1 OS=Homo sapiens GN=SENP1 PE=1 SV=2	0.0140321	2.20183	1.24224	1	1	1	1	644	73.435	8.47		1
FALSE	Medium	Master Protein	Q16890	Tumor protein D53 OS=Homo sapiens GN=TPD52L1 PE=1 SV=1	0.0140321	2.18822	6.86275	1	1	1	1	204	22.435	5.62		1
FALSE	Medium	Master Protein	A8K855	EF-hand calcium-binding domain-containing protein 7 OS=Homo sapiens GN=EFCAB7 PE=2 SV=1	0.0142694	2.17666	1.27186	1	1	1	1	629	71.935	6.38		1
FALSE	Medium	Master Protein	Q155Q3	Dixin OS=Homo sapiens GN=DIXDC1 PE=1 SV=2	0.0142694	2.17542	1.31772	1	1	1	1	683	77.43	6.24		1
FALSE	Medium	Master Protein	Q92542	Nicastrin OS=Homo sapiens GN=NCSTN PE=1 SV=2	0.0142694	2.15845	1.12835	1	1	1	1	709	78.362	5.99		1
FALSE	Medium	Master Protein	Q7Z309	Protein FAM122B OS=Homo sapiens GN=FAM122B PE=1 SV=2	0.0142694	2.15652	6.07287	1	1	1	1	247	26.911	6.37		1
FALSE	Medium	Master Protein	Q8NI35	InaD-like protein OS=Homo sapiens GN=INADL PE=1 SV=3	0.0142694	2.1485	0.444198	1	1	1	1	1801	196.247	4.94		1
FALSE	Medium	Master Protein	Q8NDX5	Polyhomeotic-like protein 3 OS=Homo sapiens GN=PHC3 PE=1 SV=1	0.0151126	2.13924	1.32248	1	1	1	1	983	106.096	6.62		1
FALSE	Medium	Master Protein	Q9H6X2	Anthrax toxin receptor 1 OS=Homo sapiens GN=ANTXR1 PE=1 SV=2	0.0153366	2.13177	1.41844	1	1	1	1	564	62.749	7.61		1
FALSE	Medium	Master Protein	Q9H7Z7	Prostaglandin E synthase 2 OS=Homo sapiens GN=PTGES2 PE=1 SV=1	0.0153366	2.12119	2.65252	1	1	1	1	377	41.917	9.16		1
FALSE	Medium	Master Protein	Q14166	Tubulin--tyrosine ligase-like protein 12 OS=Homo sapiens GN=TTLL12 PE=1 SV=2	0.0153366	2.11368	1.86335	1	1	1	1	644	74.356	5.53		1
FALSE	Medium	Master Protein	Q9Y2L9	Leucine-rich repeat and calponin homology domain-containing protein 1 OS=Homo sapiens GN=LRCH1 PE=1 SV=3	0.0153366	2.11193	2.1978	1	1	1	1	728	80.824	5.94		1
FALSE	Medium	Master Protein	P0C0L4	Complement C4-A OS=Homo sapiens GN=C4A PE=1 SV=2	0.0153366	2.10281	0.516055	1	1	1	1	1744	192.664	7.08		1
FALSE	Medium	Master Protein	Q9HAU4	E3 ubiquitin-protein ligase SMURF2 OS=Homo sapiens GN=SMURF2 PE=1 SV=1	0.0155763	2.09388	1.06952	1	1	1	1	748	86.142	7.96		1
FALSE	Medium	Master Protein	Q86T03	Type 1 phosphatidylinositol 4,5-bisphosphate 4-phosphatase OS=Homo sapiens GN=TMEM55B PE=1 SV=1	0.0155763	2.08492	3.97112	1	1	1	1	277	29.45	8.91		1
FALSE	Medium	Master Protein	Q96JJ3	Engulfment and cell motility protein 2 OS=Homo sapiens GN=ELMO2 PE=1 SV=2	0.0155763	2.07883	1.25	1	1	1	1	720	82.562	5.9		1
FALSE	Medium	Master Protein	Q9UHR6	Zinc finger HIT domain-containing protein 2 OS=Homo sapiens GN=ZNHIT2 PE=1 SV=1	0.0155763	2.07593	2.72953	1	1	1	1	403	42.857	5.99		1
FALSE	Medium	Master Protein	Q9NZN5	Rho guanine nucleotide exchange factor 12 OS=Homo sapiens GN=ARHGEF12 PE=1 SV=1	0.0158506	2.06707	0.712435	1	1	1	1	1544	173.125	5.74		1
FALSE	Medium	Master Protein	P52756	RNA-binding protein 5 OS=Homo sapiens GN=RBM5 PE=1 SV=2	0.0169396	2.04968	1.10429	1	1	1	1	815	92.097	6.28		1
FALSE	Medium	Master Protein	Q8N5B7	Ceramide synthase 5 OS=Homo sapiens GN=CERS5 PE=2 SV=1	0.0169396	2.03777	2.29592	1	1	1	1	392	45.722	7.97		1
FALSE	Medium	Master Protein	O15400	Syntaxin-7 OS=Homo sapiens GN=STX7 PE=1 SV=4	0.0169396	2.03381	5.74713	1	1	1	1	261	29.797	5.55		1
FALSE	Medium	Master Protein	P52888	Thimet oligopeptidase OS=Homo sapiens GN=THOP1 PE=1 SV=2	0.0172073	2.01673	1.45138	1	1	1	1	689	78.789	6.05		1
FALSE	Medium	Master Protein	P49959	Double-strand break repair protein MRE11A OS=Homo sapiens GN=MRE11A PE=1 SV=3	0.0179978	2.00144	1.41243	1	1	1	1	708	80.543	5.9		1
FALSE	Medium	Master Protein	A0PJW6	Transmembrane protein 223 OS=Homo sapiens GN=TMEM223 PE=1 SV=1	0.0179978	1.99525	4.9505	1	1	1	1	202	22.035	11.02		1
FALSE	Medium	Master Protein	Q9Y3U8	60S ribosomal protein L36 OS=Homo sapiens GN=RPL36 PE=1 SV=3	0.0187991	1.97551	9.52381	1	1	1	1	105	12.246	11.59		1
FALSE	Medium	Master Protein	Q9NZQ3	NCK-interacting protein with SH3 domain OS=Homo sapiens GN=NCKIPSD PE=1 SV=1	0.0187991	1.96738	1.38504	1	1	1	1	722	78.91	6.38		1
FALSE	Medium	Master Protein	O14668	Transmembrane gamma-carboxyglutamic acid protein 1 OS=Homo sapiens GN=PRRG1 PE=1 SV=1	0.0196024	1.95742	3.21101	1	1	1	1	218	24.931	5.19		1
FALSE	Medium	Master Protein	Q9NXL9	DNA helicase MCM9 OS=Homo sapiens GN=MCM9 PE=1 SV=4	0.0196024	1.95624	1.04987	1	1	1	1	1143	127.233	7.74		1
FALSE	Medium	Master Protein	P10646	Tissue factor pathway inhibitor OS=Homo sapiens GN=TFPI PE=1 SV=1	0.0196024	1.95624	2.63158	1	1	1	1	304	34.992	8.25		1
FALSE	Medium	Master Protein	O14681	Etoposide-induced protein 2.4 homolog OS=Homo sapiens GN=EI24 PE=1 SV=4	0.0201399	1.95001	2.35294	1	1	1	1	340	38.94	9.72		1
FALSE	Medium	Master Protein	Q00169	Phosphatidylinositol transfer protein alpha isoform OS=Homo sapiens GN=PITPNA PE=1 SV=2	0.0201399	1.94885	4.81481	1	1	1	1	270	31.786	6.55		1
FALSE	Medium	Master Protein	Q9Y263	Phospholipase A-2-activating protein OS=Homo sapiens GN=PLAA PE=1 SV=2	0.0201399	1.93779	2.89308	1	1	1	1	795	87.101	6.37		1
FALSE	Medium	Master Protein	Q9NWH9	SAFB-like transcription modulator OS=Homo sapiens GN=SLTM PE=1 SV=2	0.0204082	1.93704	1.06383	1	1	1	1	1034	117.079	7.87		1
FALSE	Medium	Master Protein	P35240	Merlin OS=Homo sapiens GN=NF2 PE=1 SV=1	0.0204082	1.93256	1.51261	1	1	1	1	595	69.646	6.47		1
FALSE	Medium	Master Protein	P36507	Dual specificity mitogen-activated protein kinase kinase 2 OS=Homo sapiens GN=MAP2K2 PE=1 SV=1	0.0211994	1.91328	3	1	1	1	1	400	44.396	6.55		1
FALSE	Medium	Master Protein	Q7Z6G3	N-terminal EF-hand calcium-binding protein 2 OS=Homo sapiens GN=NECAB2 PE=1 SV=1	0.0211994	1.90658	1.81347	1	1	1	1	386	43.167	5.5		1
FALSE	Medium	Master Protein	Q658Y4	Protein FAM91A1 OS=Homo sapiens GN=FAM91A1 PE=1 SV=3	0.0214544	1.90136	0.835322	1	1	1	1	838	93.85	6.39		1
FALSE	Medium	Master Protein	Q12872	Splicing factor, suppressor of white-apricot homolog OS=Homo sapiens GN=SFSWAP PE=1 SV=3	0.0214544	1.90101	0.736067	1	1	1	1	951	104.758	8.05		1
FALSE	Medium	Master Protein	Q9Y2X7	ARF GTPase-activating protein GIT1 OS=Homo sapiens GN=GIT1 PE=1 SV=2	0.0216968	1.89722	1.83968	1	1	1	1	761	84.289	6.8		1
FALSE	Medium	Master Protein	Q5T5P2	Sickle tail protein homolog OS=Homo sapiens GN=KIAA1217 PE=1 SV=2	0.0227651	1.87943	0.360268	1	1	1	1	1943	213.983	7.06		1
FALSE	Medium	Master Protein	Q6IQ49	Protein SDE2 homolog OS=Homo sapiens GN=SDE2 PE=1 SV=1	0.023301	1.87517	1.77384	1	1	1	1	451	49.711	6.05		1
FALSE	Medium	Master Protein	Q15370	Transcription elongation factor B polypeptide 2 OS=Homo sapiens GN=TCEB2 PE=1 SV=1	0.023301	1.87322	5.9322	1	1	1	1	118	13.125	4.88		1
FALSE	Medium	Master Protein	Q9BRK4	Leucine zipper putative tumor suppressor 2 OS=Homo sapiens GN=LZTS2 PE=1 SV=2	0.024606	1.85574	1.34529	1	1	1	1	669	72.715	6.51		1
FALSE	Medium	Master Protein	Q9H299	SH3 domain-binding glutamic acid-rich-like protein 3 OS=Homo sapiens GN=SH3BGRL3 PE=1 SV=1	0.0248687	1.84164	13.9785	1	1	1	1	93	10.431	4.93		1
FALSE	Medium	Master Protein	Q96K62	Zinc finger and BTB domain-containing protein 45 OS=Homo sapiens GN=ZBTB45 PE=2 SV=1	0.0253653	1.83803	1.76125	1	1	1	1	511	53.974	6.92		1
FALSE	Medium	Master Protein	Q8WVS4	WD repeat-containing protein 60 OS=Homo sapiens GN=WDR60 PE=1 SV=3	0.0253653	1.83654	0.65666	1	1	1	1	1066	122.496	7.31		1
FALSE	Medium	Master Protein	Q9Y3A2	Probable U3 small nucleolar RNA-associated protein 11 OS=Homo sapiens GN=UTP11L PE=1 SV=2	0.0253653	1.8318	3.95257	1	1	1	1	253	30.428	10.15		1
FALSE	Medium	Master Protein	Q969X6	Cirhin OS=Homo sapiens GN=CIRH1A PE=1 SV=1	0.0255705	1.82769	1.02041	1	1	1	1	686	76.841	8.85		1
FALSE	Medium	Master Protein	Q9BYI3	Hyccin OS=Homo sapiens GN=FAM126A PE=1 SV=2	0.0255705	1.82189	2.30326	1	1	1	1	521	57.589	8.16		1
FALSE	Medium	Master Protein	Q96M96	FYVE, RhoGEF and PH domain-containing protein 4 OS=Homo sapiens GN=FGD4 PE=1 SV=2	0.0258313	1.81333	1.17493	1	1	1	1	766	86.571	6.13		1
FALSE	Medium	Master Protein	Q14527	Helicase-like transcription factor OS=Homo sapiens GN=HLTF PE=1 SV=2	0.0260774	1.80521	0.99108	1	1	1	1	1009	113.857	8.6		1
FALSE	Medium	Master Protein	Q6P1Q0	LETM1 domain-containing protein 1 OS=Homo sapiens GN=LETMD1 PE=1 SV=1	0.0260774	1.8041	3.33333	1	1	1	1	360	41.763	10.32		1
FALSE	Medium	Master Protein	Q07954	Prolow-density lipoprotein receptor-related protein 1 OS=Homo sapiens GN=LRP1 PE=1 SV=2	0.0268346	1.78808	0.154049	1	1	1	1	4544	504.276	5.39		1
FALSE	Medium	Master Protein	P17096	High mobility group protein HMG-I/HMG-Y OS=Homo sapiens GN=HMGA1 PE=1 SV=3	0.0268346	1.78781	14.9533	1	1	1	1	107	11.669	10.32		1
FALSE	Medium	Master Protein	Q9NUQ8	ATP-binding cassette sub-family F member 3 OS=Homo sapiens GN=ABCF3 PE=1 SV=2	0.0268346	1.78357	1.41044	1	1	1	1	709	79.695	6.34		1
FALSE	Medium	Master Protein	P49902	Cytosolic purine 5'-nucleotidase OS=Homo sapiens GN=NT5C2 PE=1 SV=1	0.0268346	1.78146	1.78253	1	1	1	1	561	64.928	6.14		1
FALSE	Medium	Master Protein	Q9NVE7	Pantothenate kinase 4 OS=Homo sapiens GN=PANK4 PE=1 SV=1	0.0268346	1.78094	1.42303	1	1	1	1	773	85.937	6.28		1
FALSE	Medium	Master Protein	P13984	General transcription factor IIF subunit 2 OS=Homo sapiens GN=GTF2F2 PE=1 SV=2	0.0270344	1.77885	3.21285	1	1	1	1	249	28.363	9.23		1
FALSE	Medium	Master Protein	Q92820	Gamma-glutamyl hydrolase OS=Homo sapiens GN=GGH PE=1 SV=2	0.0273	1.76095	3.77358	1	1	1	1	318	35.941	7.11		1
FALSE	Medium	Master Protein	O43464	Serine protease HTRA2, mitochondrial OS=Homo sapiens GN=HTRA2 PE=1 SV=2	0.0291951	1.75424	1.96507	1	1	1	1	458	48.811	10.07		1
FALSE	Medium	Master Protein	O94763	Unconventional prefoldin RPB5 interactor 1 OS=Homo sapiens GN=URI1 PE=1 SV=3	0.0305427	1.74958	1.30841	1	1	1	1	535	59.796	5.05		1
FALSE	Medium	Master Protein	Q5TZJ5	Spermatogenesis-associated protein 31A1 OS=Homo sapiens GN=SPATA31A1 PE=3 SV=1	0.0315303	1.73802	1.26206	1	1	1	1	1347	148.467	8.81		1
FALSE	Medium	Master Protein	Q9H0M4	Zinc finger CW-type PWWP domain protein 1 OS=Homo sapiens GN=ZCWPW1 PE=1 SV=2	0.0325645	1.72979	3.39506	1	1	1	1	648	71.962	7.53		1
FALSE	Medium	Master Protein	Q8N335	Glycerol-3-phosphate dehydrogenase 1-like protein OS=Homo sapiens GN=GPD1L PE=1 SV=1	0.0325645	1.72354	1.9943	1	1	1	1	351	38.394	7.02		1
FALSE	Medium	Master Protein	Q96CS7	Pleckstrin homology domain-containing family B member 2 OS=Homo sapiens GN=PLEKHB2 PE=1 SV=1	0.0336317	1.71579	3.15315	1	1	1	1	222	24.72	5.39		1
FALSE	Medium	Master Protein	Q9ULG1	DNA helicase INO80 OS=Homo sapiens GN=INO80 PE=1 SV=2	0.0345479	1.70531	0.771208	1	1	1	1	1556	176.643	9.5		1
FALSE	Medium	Master Protein	P16220	Cyclic AMP-responsive element-binding protein 1 OS=Homo sapiens GN=CREB1 PE=1 SV=2	0.0345479	1.70509	2.05279	1	1	1	1	341	36.666	5.57		1
FALSE	Medium	Master Protein	O94851	Protein-methionine sulfoxide oxidase MICAL2 OS=Homo sapiens GN=MICAL2 PE=1 SV=1	0.0345479	1.70224	1.06762	1	1	1	1	1124	126.609	8.65		1
FALSE	Medium	Master Protein	Q9NPC8	Homeobox protein SIX2 OS=Homo sapiens GN=SIX2 PE=1 SV=1	0.0345479	1.69702	2.4055	1	1	1	1	291	32.266	9.01		1
FALSE	Medium	Master Protein	Q99650	Oncostatin-M-specific receptor subunit beta OS=Homo sapiens GN=OSMR PE=1 SV=1	0.0345479	1.69336	0.715015	1	1	1	1	979	110.438	5.82		1
FALSE	Medium	Master Protein	P22670	MHC class II regulatory factor RFX1 OS=Homo sapiens GN=RFX1 PE=1 SV=2	0.0352909	1.68382	1.1236	1	1	1	1	979	104.693	6.29		1
FALSE	Medium	Master Protein	P11182	Lipoamide acyltransferase component of branched-chain alpha-keto acid dehydrogenase complex, mitochondrial OS=Homo sapiens GN=DBT PE=1 SV=3	0.0352909	1.6834	2.90456	1	1	1	1	482	53.453	8.51		1
FALSE	Medium	Master Protein	Q99250	Sodium channel protein type 2 subunit alpha OS=Homo sapiens GN=SCN2A PE=1 SV=3	0.0352909	1.6784	0.448878	1	1	1	1	2005	227.827	5.73		1
FALSE	Medium	Master Protein	Q9GZZ9	Ubiquitin-like modifier-activating enzyme 5 OS=Homo sapiens GN=UBA5 PE=1 SV=1	0.0355508	1.67325	2.9703	1	1	1	1	404	44.834	4.84		1
FALSE	Medium	Master Protein	Q9BY07	Electrogenic sodium bicarbonate cotransporter 4 OS=Homo sapiens GN=SLC4A5 PE=2 SV=2	0.0360603	1.66394	0.615655	1	1	1	1	1137	126.174	7.91		1
FALSE	Medium	Master Protein	Q8N961	Ankyrin repeat and BTB/POZ domain-containing protein 2 OS=Homo sapiens GN=ABTB2 PE=2 SV=2	0.0371067	1.65817	0.878049	1	1	1	1	1025	113.584	6.29		1
FALSE	Medium	Master Protein	Q04941	Proteolipid protein 2 OS=Homo sapiens GN=PLP2 PE=1 SV=1	0.0383687	1.6457	8.55263	1	1	1	1	152	16.68	7.24		1
FALSE	Medium	Master Protein	Q4G0N4	NAD kinase 2, mitochondrial OS=Homo sapiens GN=NADK2 PE=1 SV=2	0.0383687	1.64493	3.84615	1	1	1	1	442	49.402	8.18		1
FALSE	Medium	Master Protein	Q9UL54	Serine/threonine-protein kinase TAO2 OS=Homo sapiens GN=TAOK2 PE=1 SV=2	0.0385749	1.64397	0.647773	1	1	1	1	1235	138.166	7.27		1
FALSE	Medium	Master Protein	Q9UIA9	Exportin-7 OS=Homo sapiens GN=XPO7 PE=1 SV=3	0.0385749	1.64187	0.735971	1	1	1	1	1087	123.828	6.32		1
FALSE	Medium	Master Protein	Q14451	Growth factor receptor-bound protein 7 OS=Homo sapiens GN=GRB7 PE=1 SV=2	0.038822	1.64073	1.50376	1	1	1	1	532	59.643	8.5		1
FALSE	Medium	Master Protein	Q13740	CD166 antigen OS=Homo sapiens GN=ALCAM PE=1 SV=2	0.038822	1.64035	1.88679	1	1	1	1	583	65.061	6.25		1
FALSE	Medium	Master Protein	Q9NP64	Nucleolar protein of 40 kDa OS=Homo sapiens GN=ZCCHC17 PE=1 SV=1	0.0390374	1.63582	7.05394	1	1	1	1	241	27.552	9.7		1
FALSE	Medium	Master Protein	Q6ZNB6	NF-X1-type zinc finger protein NFXL1 OS=Homo sapiens GN=NFXL1 PE=1 SV=2	0.0390374	1.63376	0.768386	1	1	1	1	911	101.27	8.41		1
FALSE	Medium	Master Protein	Q969V5	Mitochondrial ubiquitin ligase activator of NFKB 1 OS=Homo sapiens GN=MUL1 PE=1 SV=1	0.0392943	1.62893	2.84091	1	1	1	1	352	39.774	8.13		1
FALSE	Medium	Master Protein	Q9BVV7	Mitochondrial import inner membrane translocase subunit Tim21 OS=Homo sapiens GN=TIMM21 PE=1 SV=1	0.0397016	1.62088	4.03226	1	1	1	1	248	28.185	9.7		1
FALSE	Medium	Master Protein	Q9NPL8	Complex I assembly factor TIMMDC1, mitochondrial OS=Homo sapiens GN=TIMMDC1 PE=1 SV=2	0.0397016	1.61961	3.50877	1	1	1	1	285	32.158	8.5		1
FALSE	Medium	Master Protein	P05107	Integrin beta-2 OS=Homo sapiens GN=ITGB2 PE=1 SV=2	0.0399467	1.61601	1.04031	1	1	1	1	769	84.726	6.95		1
FALSE	Medium	Master Protein	Q9H4B6	Protein salvador homolog 1 OS=Homo sapiens GN=SAV1 PE=1 SV=2	0.0399467	1.61529	1.82768	1	1	1	1	383	44.606	9.09		1
FALSE	Medium	Master Protein	Q96FJ0	AMSH-like protease OS=Homo sapiens GN=STAMBPL1 PE=1 SV=2	0.0415004	1.61101	1.6055	1	1	1	1	436	49.751	7.23		1
FALSE	Medium	Master Protein	Q15397	Pumilio domain-containing protein KIAA0020 OS=Homo sapiens GN=KIAA0020 PE=1 SV=3	0.0415004	1.6103	1.23457	1	1	1	1	648	73.538	9.64		1
FALSE	Medium	Master Protein	Q8IWA0	WD repeat-containing protein 75 OS=Homo sapiens GN=WDR75 PE=1 SV=1	0.0415004	1.60995	0.963855	1	1	1	1	830	94.438	5.96		1
FALSE	Medium	Master Protein	O94927	HAUS augmin-like complex subunit 5 OS=Homo sapiens GN=HAUS5 PE=1 SV=2	0.0422423	1.60924	1.4218	1	1	1	1	633	71.638	8.51		1
FALSE	Medium	Master Protein	Q8WXG6	MAP kinase-activating death domain protein OS=Homo sapiens GN=MADD PE=1 SV=2	0.0424741	1.6073	0.425015	1	1	1	1	1647	183.188	6.04		1
FALSE	Medium	Master Protein	Q9BW66	Cyclin-dependent kinase 2-interacting protein OS=Homo sapiens GN=CINP PE=1 SV=1	0.0424741	1.60642	3.77358	1	1	1	1	212	24.308	6.28		1
FALSE	Medium	Master Protein	Q5TC63	Growth hormone-regulated TBC protein 1 OS=Homo sapiens GN=GRTP1 PE=1 SV=4	0.0427169	1.60241	2.67857	1	1	1	1	336	38.529	8.78		1
FALSE	Medium	Master Protein	Q99614	Tetratricopeptide repeat protein 1 OS=Homo sapiens GN=TTC1 PE=1 SV=1	0.0429253	1.59963	3.42466	1	1	1	1	292	33.505	4.84		1
FALSE	Medium	Master Protein	P06746	DNA polymerase beta OS=Homo sapiens GN=POLB PE=1 SV=3	0.0437995	1.59517	2.98507	1	1	1	1	335	38.154	8.95		1
FALSE	Medium	Master Protein	Q8N3R9	MAGUK p55 subfamily member 5 OS=Homo sapiens GN=MPP5 PE=1 SV=3	0.0437995	1.58419	1.03704	1	1	1	1	675	77.246	6.14		1
FALSE	Medium	Master Protein	Q12796	Proline-rich nuclear receptor coactivator 1 OS=Homo sapiens GN=PNRC1 PE=1 SV=1	0.0437995	1.58386	2.44648	1	1	1	1	327	35.203	10.51		1
FALSE	Medium	Master Protein	Q6ZRV2	Protein FAM83H OS=Homo sapiens GN=FAM83H PE=1 SV=3	0.0437995	1.58137	1.35708	1	1	1	1	1179	127.044	6.98		1
FALSE	Medium	Master Protein	Q9H8H0	Nucleolar protein 11 OS=Homo sapiens GN=NOL11 PE=1 SV=1	0.0444386	1.57203	0.973574	1	1	1	1	719	81.072	6.07		1
FALSE	Medium	Master Protein	Q5TCY1	Tau-tubulin kinase 1 OS=Homo sapiens GN=TTBK1 PE=1 SV=2	0.0444386	1.56735	0.681302	1	1	1	1	1321	142.65	5.6		1
FALSE	Medium	Master Protein	Q15382	GTP-binding protein Rheb OS=Homo sapiens GN=RHEB PE=1 SV=1	0.0462306	1.56431	3.80435	1	1	1	1	184	20.485	5.92		1
FALSE	Medium	Master Protein	Q7Z736	Pleckstrin homology domain-containing family H member 3 OS=Homo sapiens GN=PLEKHH3 PE=1 SV=2	0.046408	1.56368	1.51324	1	1	1	1	793	85.264	7.83		1
FALSE	Medium	Master Protein	Q8N357	Solute carrier family 35 member F6 OS=Homo sapiens GN=SLC35F6 PE=1 SV=1	0.046408	1.56225	1.88679	1	1	1	1	371	40.188	6.93		1
FALSE	Medium	Master Protein	Q9NPP4	NLR family CARD domain-containing protein 4 OS=Homo sapiens GN=NLRC4 PE=1 SV=2	0.046408	1.56225	0.683594	1	1	1	1	1024	116.085	6.77		1
FALSE	Medium	Master Protein	P56589	Peroxisomal biogenesis factor 3 OS=Homo sapiens GN=PEX3 PE=1 SV=1	0.046408	1.56193	2.68097	1	1	1	1	373	42.113	8.15		1
FALSE	Medium	Master Protein	Q96K17	Transcription factor BTF3 homolog 4 OS=Homo sapiens GN=BTF3L4 PE=1 SV=1	0.0466091	1.56004	4.43038	1	1	1	1	158	17.26	6.35		1
FALSE	Medium	Master Protein	Q9NZP5	Olfactory receptor 5AC2 OS=Homo sapiens GN=OR5AC2 PE=3 SV=2	0.0466091	1.55642	2.26537	1	1	1	1	309	35.281	8.94		1
FALSE	Medium	Master Protein	Q8NEF9	Serum response factor-binding protein 1 OS=Homo sapiens GN=SRFBP1 PE=1 SV=1	0.0466091	1.55611	2.0979	1	1	1	1	429	48.604	9.58		1
FALSE	Medium	Master Protein	P04207	Ig kappa chain V-III region CLL OS=Homo sapiens PE=4 SV=2	0.0467607	1.54883	6.97674	1	1	1	1	129	14.266	8.51		1
FALSE	Medium	Master Protein	Q15057	Arf-GAP with coiled-coil, ANK repeat and PH domain-containing protein 2 OS=Homo sapiens GN=ACAP2 PE=1 SV=3	0.0474824	1.53925	1.28535	1	1	1	1	778	87.973	6.8		1
FALSE	Medium	Master Protein	Q6IMN6	Caprin-2 OS=Homo sapiens GN=CAPRIN2 PE=1 SV=1	0.0477308	1.53745	0.621118	1	1	1	1	1127	125.847	6.71		1
FALSE	Medium	Master Protein	O00458	Interferon-related developmental regulator 1 OS=Homo sapiens GN=IFRD1 PE=1 SV=4	0.0495846	1.50878	1.99557	1	1	1	1	451	50.236	7.18		1
FALSE	Medium	Master Protein	Q8TAD8	Smad nuclear-interacting protein 1 OS=Homo sapiens GN=SNIP1 PE=1 SV=1	0.0495846	1.50557	2.77778	1	1	1	1	396	45.75	9.99		1
FALSE	Medium	Master Protein	P29084	Transcription initiation factor IIE subunit beta OS=Homo sapiens GN=GTF2E2 PE=1 SV=1	0.0495846	1.50487	2.4055	1	1	1	1	291	33.023	9.66		1
FALSE	Low	Master Protein	Q6UB99	Ankyrin repeat domain-containing protein 11 OS=Homo sapiens GN=ANKRD11 PE=1 SV=3	0.0505968	1.49798	0.488171	1	1	1	1	2663	297.731	7.11		1
FALSE	Low	Master Protein	Q6PJP8	DNA cross-link repair 1A protein OS=Homo sapiens GN=DCLRE1A PE=1 SV=3	0.0508035	1.49675	0.865385	1	1	1	1	1040	116.326	7.97		1
FALSE	Low	Master Protein	Q9Y5A6	Zinc finger and SCAN domain-containing protein 21 OS=Homo sapiens GN=ZSCAN21 PE=1 SV=2	0.0508035	1.49607	2.11416	1	1	1	1	473	53.624	7.72		1
FALSE	Low	Master Protein	O15540	Fatty acid-binding protein, brain OS=Homo sapiens GN=FABP7 PE=1 SV=3	0.0508035	1.49567	10.6061	1	1	1	1	132	14.879	5.59		1
FALSE	Low	Master Protein	Q3V6T2	Girdin OS=Homo sapiens GN=CCDC88A PE=1 SV=2	0.0517598	1.48399	0.374131	1	1	1	1	1871	215.909	6.21		1
FALSE	Low	Master Protein	O94903	Proline synthase co-transcribed bacterial homolog protein OS=Homo sapiens GN=PROSC PE=1 SV=1	0.0520052	1.48228	4.72727	1	1	1	1	275	30.325	7.5		1
FALSE	Low	Master Protein	Q02224	Centromere-associated protein E OS=Homo sapiens GN=CENPE PE=1 SV=2	0.0522504	1.48096	0.55535	1	1	1	1	2701	316.219	5.64		1
FALSE	Low	Master Protein	Q32NC0	UPF0711 protein C18orf21 OS=Homo sapiens GN=C18orf21 PE=1 SV=1	0.0523871	1.47782	3.18182	1	1	1	1	220	24.811	10.26		1
FALSE	Low	Master Protein	O75077	Disintegrin and metalloproteinase domain-containing protein 23 OS=Homo sapiens GN=ADAM23 PE=1 SV=1	0.0523871	1.4773	1.68269	1	1	1	1	832	91.867	7.64		1
FALSE	Low	Master Protein	O15084	Serine/threonine-protein phosphatase 6 regulatory ankyrin repeat subunit A OS=Homo sapiens GN=ANKRD28 PE=1 SV=5	0.0523871	1.47677	0.664767	1	1	1	1	1053	112.894	6.25		1
FALSE	Low	Master Protein	Q9BRK5	45 kDa calcium-binding protein OS=Homo sapiens GN=SDF4 PE=1 SV=1	0.0523871	1.47547	2.76243	1	1	1	1	362	41.78	4.86		1
FALSE	Low	Master Protein	Q2TB18	Protein asteroid homolog 1 OS=Homo sapiens GN=ASTE1 PE=1 SV=1	0.0524691	1.46993	1.03093	1	1	1	1	679	77.044	8.06		1
FALSE	Low	Master Protein	Q14117	Dihydropyrimidinase OS=Homo sapiens GN=DPYS PE=1 SV=1	0.0524691	1.46521	2.11946	1	1	1	1	519	56.594	7.27		1
FALSE	Low	Master Protein	P49795	Regulator of G-protein signaling 19 OS=Homo sapiens GN=RGS19 PE=1 SV=1	0.0524691	1.46206	3.68664	1	1	1	1	217	24.62	5.62		1
FALSE	Low	Master Protein	Q9HB58	Sp110 nuclear body protein OS=Homo sapiens GN=SP110 PE=1 SV=5	0.0524691	1.46193	1.30624	1	1	1	1	689	78.345	8.87		1
FALSE	Low	Master Protein	Q15361	Transcription termination factor 1 OS=Homo sapiens GN=TTF1 PE=1 SV=3	0.0541303	1.44021	0.883978	1	1	1	1	905	102.987	9.38		1
FALSE	Low	Master Protein	Q9Y2Z0	Protein SGT1 homolog OS=Homo sapiens GN=SUGT1 PE=1 SV=3	0.0541303	1.43795	3.0137	1	1	1	1	365	40.998	5.16		1
FALSE	Low	Master Protein	P26572	Alpha-1,3-mannosyl-glycoprotein 2-beta-N-acetylglucosaminyltransferase OS=Homo sapiens GN=MGAT1 PE=1 SV=2	0.0573183	1.41635	3.14607	1	1	1	1	445	50.846	9.16		1
FALSE	Low	Master Protein	P53004	Biliverdin reductase A OS=Homo sapiens GN=BLVRA PE=1 SV=2	0.0580414	1.41319	4.72973	1	1	1	1	296	33.407	6.44		1
FALSE	Low	Master Protein	A6QL63	Ankyrin repeat and BTB/POZ domain-containing protein BTBD11 OS=Homo sapiens GN=BTBD11 PE=2 SV=3	0.0580414	1.41173	0.815217	1	1	1	1	1104	120.807	6.83		1
FALSE	Low	Master Protein	Q96S82	Ubiquitin-like protein 7 OS=Homo sapiens GN=UBL7 PE=1 SV=2	0.0585378	1.40671	2.36842	1	1	1	1	380	40.485	5.07		1
FALSE	Low	Master Protein	Q5W0B1	RING finger protein 219 OS=Homo sapiens GN=RNF219 PE=1 SV=1	0.0590038	1.40023	0.964187	1	1	1	1	726	81.066	5.72		1
FALSE	Low	Master Protein	Q5T750	Skin-specific protein 32 OS=Homo sapiens GN=XP32 PE=1 SV=1	0.0592139	1.39426	3.6	1	1	1	1	250	26.219	7.97		1
FALSE	Low	Master Protein	Q6ZVM7	TOM1-like protein 2 OS=Homo sapiens GN=TOM1L2 PE=1 SV=1	0.0606524	1.38838	1.38067	1	1	1	1	507	55.522	4.79		1
FALSE	Low	Master Protein	P18074	TFIIH basal transcription factor complex helicase XPD subunit OS=Homo sapiens GN=ERCC2 PE=1 SV=1	0.0608297	1.38331	1.71053	1	1	1	1	760	86.854	7.15		1
FALSE	Low	Master Protein	Q96JB5	CDK5 regulatory subunit-associated protein 3 OS=Homo sapiens GN=CDK5RAP3 PE=1 SV=2	0.0608297	1.37976	1.3834	1	1	1	1	506	56.885	4.75		1
FALSE	Low	Master Protein	Q96K30	RBPJ-interacting and tubulin-associated protein 1 OS=Homo sapiens GN=RITA1 PE=1 SV=1	0.0610532	1.37841	3.34572	1	1	1	1	269	28.602	11.08		1
FALSE	Low	Master Protein	Q6PJG6	BRCA1-associated ATM activator 1 OS=Homo sapiens GN=BRAT1 PE=1 SV=2	0.0610532	1.37737	1.09622	1	1	1	1	821	88.063	5.27		1
FALSE	Low	Master Protein	Q5VV67	Peroxisome proliferator-activated receptor gamma coactivator-related protein 1 OS=Homo sapiens GN=PPRC1 PE=1 SV=1	0.0625318	1.36603	1.5024	1	1	1	1	1664	177.434	6.51		1
FALSE	Low	Master Protein	O15061	Synemin OS=Homo sapiens GN=SYNM PE=1 SV=2	0.0626744	1.36401	0.638978	1	1	1	1	1565	172.663	5.16		1
FALSE	Low	Master Protein	Q6ZTA4	Tripartite motif-containing protein 67 OS=Homo sapiens GN=TRIM67 PE=2 SV=3	0.0626744	1.36251	2.42656	1	1	1	1	783	83.769	7.33		1
FALSE	Low	Master Protein	Q92558	Wiskott-Aldrich syndrome protein family member 1 OS=Homo sapiens GN=WASF1 PE=1 SV=1	0.0626744	1.36221	1.43113	1	1	1	1	559	61.614	6.46		1
FALSE	Low	Master Protein	Q6DN12	Multiple C2 and transmembrane domain-containing protein 2 OS=Homo sapiens GN=MCTP2 PE=1 SV=3	0.0626744	1.36161	1.13895	1	1	1	1	878	99.533	7.56		1
FALSE	Low	Master Protein	Q9P016	Thymocyte nuclear protein 1 OS=Homo sapiens GN=THYN1 PE=1 SV=1	0.0628485	1.36131	3.55556	1	1	1	1	225	25.681	9.25		1
FALSE	Low	Master Protein	O43818	U3 small nucleolar RNA-interacting protein 2 OS=Homo sapiens GN=RRP9 PE=1 SV=1	0.0628485	1.36071	2.31579	1	1	1	1	475	51.809	7.85		1
FALSE	Low	Master Protein	P05090	Apolipoprotein D OS=Homo sapiens GN=APOD PE=1 SV=1	0.064843	1.34611	3.1746	1	1	1	1	189	21.262	5.15		1
FALSE	Low	Master Protein	Q03001	Dystonin OS=Homo sapiens GN=DST PE=1 SV=4	0.0660091	1.34294	0.1321	1	1	1	1	7570	860.127	5.25		1
FALSE	Low	Master Protein	Q9C0C9	(E3-independent) E2 ubiquitin-conjugating enzyme OS=Homo sapiens GN=UBE2O PE=1 SV=3	0.0671378	1.33329	0.541796	1	1	1	1	1292	141.205	5.12		1
FALSE	Low	Master Protein	Q13614	Myotubularin-related protein 2 OS=Homo sapiens GN=MTMR2 PE=1 SV=4	0.0671378	1.33264	1.39969	1	1	1	1	643	73.335	7.4		1
FALSE	Low	Master Protein	Q8IVB5	LIX1-like protein OS=Homo sapiens GN=LIX1L PE=2 SV=1	0.0673732	1.3305	2.07715	1	1	1	1	337	36.54	8.56		1
FALSE	Low	Master Protein	Q9Y2F5	Little elongation complex subunit 1 OS=Homo sapiens GN=ICE1 PE=1 SV=5	0.0680444	1.3256	0.308914	1	1	1	1	2266	247.737	5.48		1
FALSE	Low	Master Protein	Q9P2F5	Storkhead-box protein 2 OS=Homo sapiens GN=STOX2 PE=2 SV=2	0.069035	1.32203	0.863931	1	1	1	1	926	102.608	8.4		1
FALSE	Low	Master Protein	Q05397	Focal adhesion kinase 1 OS=Homo sapiens GN=PTK2 PE=1 SV=2	0.0699547	1.31319	0.665399	1	1	1	1	1052	119.157	6.62		1
FALSE	Low	Master Protein	Q7Z6M4	Transcription termination factor 4, mitochondrial OS=Homo sapiens GN=MTERF4 PE=1 SV=3	0.0726635	1.30008	2.3622	1	1	1	1	381	43.93	4.82		1
FALSE	Low	Master Protein	Q14807	Kinesin-like protein KIF22 OS=Homo sapiens GN=KIF22 PE=1 SV=5	0.0755988	1.26809	2.25564	1	1	1	1	665	73.217	9.45		1
FALSE	Low	Master Protein	Q9GZP0	Platelet-derived growth factor D OS=Homo sapiens GN=PDGFD PE=1 SV=1	0.0755988	1.26488	1.89189	1	1	1	1	370	42.821	7.97		1
FALSE	Low	Master Protein	P49427	Ubiquitin-conjugating enzyme E2 R1 OS=Homo sapiens GN=CDC34 PE=1 SV=2	0.0760219	1.26201	2.9661	1	1	1	1	236	26.72	4.54		1
FALSE	Low	Master Protein	Q149N8	E3 ubiquitin-protein ligase SHPRH OS=Homo sapiens GN=SHPRH PE=1 SV=2	0.0760219	1.26193	0.475342	1	1	1	1	1683	192.957	7.47		1
FALSE	Low	Master Protein	Q96SL8	Flt3-interacting zinc finger protein 1 OS=Homo sapiens GN=FIZ1 PE=1 SV=2	0.077172	1.25352	2.41935	1	1	1	1	496	51.962	8.19		1
FALSE	Low	Master Protein	P23760	Paired box protein Pax-3 OS=Homo sapiens GN=PAX3 PE=1 SV=2	0.0778026	1.24298	2.50522	1	1	1	1	479	52.934	8.72		1
FALSE	Low	Master Protein	Q96ES7	SAGA-associated factor 29 homolog OS=Homo sapiens GN=CCDC101 PE=1 SV=1	0.077993	1.2365	2.04778	1	1	1	1	293	33.217	8.1		1
FALSE	Low	Master Protein	Q9UNN5	FAS-associated factor 1 OS=Homo sapiens GN=FAF1 PE=1 SV=2	0.077993	1.23552	1.07692	1	1	1	1	650	73.908	4.88		1
FALSE	Low	Master Protein	Q14CM0	FERM and PDZ domain-containing protein 4 OS=Homo sapiens GN=FRMPD4 PE=1 SV=1	0.0787186	1.22775	1.059	1	1	1	1	1322	144.289	5.25		1
FALSE	Low	Master Protein	Q96AB3	Isochorismatase domain-containing protein 2, mitochondrial OS=Homo sapiens GN=ISOC2 PE=1 SV=1	0.0796328	1.21903	2.92683	1	1	1	1	205	22.323	7.77		1
FALSE	Low	Master Protein	Q9BUI4	DNA-directed RNA polymerase III subunit RPC3 OS=Homo sapiens GN=POLR3C PE=1 SV=1	0.0796328	1.21817	1.1236	1	1	1	1	534	60.573	7.31		1
FALSE	Low	Master Protein	Q15648	Mediator of RNA polymerase II transcription subunit 1 OS=Homo sapiens GN=MED1 PE=1 SV=4	0.0796328	1.2171	0.442758	1	1	1	1	1581	168.373	8.73		1
FALSE	Low	Master Protein	Q17RY6	Lymphocyte antigen 6K OS=Homo sapiens GN=LY6K PE=1 SV=2	0.0803372	1.21439	6.06061	1	1	1	1	165	18.66	7.43		1
FALSE	Low	Master Protein	Q8WVD3	E3 ubiquitin-protein ligase RNF138 OS=Homo sapiens GN=RNF138 PE=1 SV=1	0.0828798	1.19192	3.67347	1	1	1	1	245	28.174	6.93		1
FALSE	Low	Master Protein	Q12834	Cell division cycle protein 20 homolog OS=Homo sapiens GN=CDC20 PE=1 SV=2	0.0830655	1.18349	1.80361	1	1	1	1	499	54.689	9.23		1
FALSE	Low	Master Protein	Q9NRL3	Striatin-4 OS=Homo sapiens GN=STRN4 PE=1 SV=2	0.0840128	1.18277	1.06242	1	1	1	1	753	80.546	5.4		1
FALSE	Low	Master Protein	Q9Y6L7	Tolloid-like protein 2 OS=Homo sapiens GN=TLL2 PE=1 SV=1	0.0851852	1.17548	0.591133	1	1	1	1	1015	113.484	5.94		1
FALSE	Low	Master Protein	Q9NUU6	Inactive ubiquitin thioesterase FAM105A OS=Homo sapiens GN=FAM105A PE=2 SV=1	0.0851852	1.17535	1.96629	1	1	1	1	356	42.169	9.29		1
FALSE	Low	Master Protein	Q9NX47	E3 ubiquitin-protein ligase MARCH5 OS=Homo sapiens GN=MARCH5 PE=1 SV=1	0.0851852	1.17529	2.51799	1	1	1	1	278	31.211	8.7		1
FALSE	Low	Master Protein	O43318	Mitogen-activated protein kinase kinase kinase 7 OS=Homo sapiens GN=MAP3K7 PE=1 SV=1	0.0856367	1.1698	1.15512	1	1	1	1	606	67.153	7.11		1
FALSE	Low	Master Protein	Q92830	Histone acetyltransferase KAT2A OS=Homo sapiens GN=KAT2A PE=1 SV=3	0.0856367	1.16909	1.07527	1	1	1	1	837	93.866	9.04		1
FALSE	Low	Master Protein	Q9NZT2	Opioid growth factor receptor OS=Homo sapiens GN=OGFR PE=1 SV=3	0.0865598	1.16027	1.4771	1	1	1	1	677	73.28	4.84		1
FALSE	High	Master Protein	O00571	ATP-dependent RNA helicase DDX3X OS=Homo sapiens GN=DDX3X PE=1 SV=3	0	827.872	78.7009	73	1234	72	1	662	73.198	7.18	546	688
FALSE	High	Master Protein	P35579	Myosin-9 OS=Homo sapiens GN=MYH9 PE=1 SV=4	0	3366.1	77.2449	247	1863	208	1	1960	226.392	5.6	408	1455
FALSE	High	Master Protein	Q00839	Heterogeneous nuclear ribonucleoprotein U OS=Homo sapiens GN=HNRNPU PE=1 SV=6	0	749.98	58.7879	59	741	59	1	825	90.528	6	406	335
FALSE	High	Master Protein	O15027	Protein transport protein Sec16A OS=Homo sapiens GN=SEC16A PE=1 SV=3	0	757.342	46.7187	77	548	77	1	2179	233.373	5.63	399	149
FALSE	High	Master Protein	P17844	Probable ATP-dependent RNA helicase DDX5 OS=Homo sapiens GN=DDX5 PE=1 SV=1	0	819.174	71.6612	68	916	55	1	614	69.105	8.92	374	542
FALSE	High	Master Protein	Q9BUJ2	Heterogeneous nuclear ribonucleoprotein U-like protein 1 OS=Homo sapiens GN=HNRNPUL1 PE=1 SV=2	0	775.641	50.1168	57	707	57	1	856	95.679	6.92	314	393
FALSE	High	Master Protein	Q92841	Probable ATP-dependent RNA helicase DDX17 OS=Homo sapiens GN=DDX17 PE=1 SV=2	0	572.242	55.5556	54	765	41	1	729	80.222	8.27	298	467
FALSE	High	Master Protein	P22626	Heterogeneous nuclear ribonucleoproteins A2/B1 OS=Homo sapiens GN=HNRNPA2B1 PE=1 SV=2	0	609.364	81.5864	43	966	39	1	353	37.407	8.95	297	669
FALSE	High	Master Protein	P11940	Polyadenylate-binding protein 1 OS=Homo sapiens GN=PABPC1 PE=1 SV=2	0	677.039	79.2453	53	569	37	1	636	70.626	9.5	297	272
FALSE	High	Master Protein	Q08211	ATP-dependent RNA helicase A OS=Homo sapiens GN=DHX9 PE=1 SV=4	0	740.634	51.9685	72	581	72	1	1270	140.869	6.84	290	291
FALSE	High	Master Protein	Q92734	Protein TFG OS=Homo sapiens GN=TFG PE=1 SV=2	0	519.982	48.5	25	707	23	1	400	43.421	5.1	283	424
FALSE	High	Master Protein	P04264	Keratin, type II cytoskeletal 1 OS=Homo sapiens GN=KRT1 PE=1 SV=6	0	408.155	63.354	46	643	39	1	644	65.999	8.12	261	382
FALSE	High	Master Protein	Q9UPQ9	Trinucleotide repeat-containing gene 6B protein OS=Homo sapiens GN=TNRC6B PE=1 SV=4	0	993.527	58.4288	77	532	77	1	1833	193.883	6.76	251	281
FALSE	High	Master Protein	P38646	Stress-70 protein, mitochondrial OS=Homo sapiens GN=HSPA9 PE=1 SV=2	0	684.509	63.623	51	489	51	1	679	73.635	6.16	242	247
FALSE	High	Master Protein	P31943	Heterogeneous nuclear ribonucleoprotein H OS=Homo sapiens GN=HNRNPH1 PE=1 SV=4	0	413.993	61.6927	31	534	18	1	449	49.198	6.3	241	293
FALSE	High	Master Protein	P63261	Actin, cytoplasmic 2 OS=Homo sapiens GN=ACTG1 PE=1 SV=1	0	876.192	91.2	43	1177	1	1	375	41.766	5.48	236	941
FALSE	High	Master Protein	P60709	Actin, cytoplasmic 1 OS=Homo sapiens GN=ACTB PE=1 SV=1	0	852.366	91.2	43	1167	1	1	375	41.71	5.48	235	932
FALSE	High	Master Protein	Q9UKV8	Protein argonaute-2 OS=Homo sapiens GN=AGO2 PE=1 SV=3	0	646.209	76.135	59	397	48	1	859	97.146	9.19	229	168
FALSE	High	Master Protein	Q13310	Polyadenylate-binding protein 4 OS=Homo sapiens GN=PABPC4 PE=1 SV=1	0	593.961	65.6832	51	438	33	1	644	70.738	9.26	220	218
FALSE	High	Master Protein	O60506	Heterogeneous nuclear ribonucleoprotein Q OS=Homo sapiens GN=SYNCRIP PE=1 SV=2	0	612.541	58.2665	45	546	37	1	623	69.56	8.59	216	330
FALSE	High	Master Protein	P61978	Heterogeneous nuclear ribonucleoprotein K OS=Homo sapiens GN=HNRNPK PE=1 SV=1	0	399.012	66.9546	36	478	36	1	463	50.944	5.54	216	262
FALSE	High	Master Protein	Q92900	Regulator of nonsense transcripts 1 OS=Homo sapiens GN=UPF1 PE=1 SV=2	0	496.16	56.7759	57	289	57	1	1129	124.267	6.61	207	82
FALSE	High	Master Protein	O43390	Heterogeneous nuclear ribonucleoprotein R OS=Homo sapiens GN=HNRNPR PE=1 SV=1	0	453.176	48.6572	38	515	30	1	633	70.899	8.13	201	314
FALSE	High	Master Protein	P13645	Keratin, type I cytoskeletal 10 OS=Homo sapiens GN=KRT10 PE=1 SV=6	0	269.365	58.0479	38	493	29	1	584	58.792	5.21	201	292
FALSE	High	Master Protein	P35908	Keratin, type II cytoskeletal 2 epidermal OS=Homo sapiens GN=KRT2 PE=1 SV=2	0	216.334	62.4413	37	429	25	1	639	65.393	8	185	244
FALSE	High	Master Protein	P35637	RNA-binding protein FUS OS=Homo sapiens GN=FUS PE=1 SV=1	0	444.365	29.8479	22	679	19	1	526	53.394	9.36	176	503
FALSE	High	Master Protein	Q96PK6	RNA-binding protein 14 OS=Homo sapiens GN=RBM14 PE=1 SV=2	0	409.819	56.2033	41	442	41	1	669	69.449	9.67	172	270
FALSE	High	Master Protein	P51532	Transcription activator BRG1 OS=Homo sapiens GN=SMARCA4 PE=1 SV=2	0	641.716	36.612	75	334	45	1	1647	184.53	7.88	171	163
FALSE	High	Master Protein	Q6PKG0	La-related protein 1 OS=Homo sapiens GN=LARP1 PE=1 SV=2	0	367.811	44.7993	50	249	46	1	1096	123.434	8.82	169	80
FALSE	High	Master Protein	P42704	Leucine-rich PPR motif-containing protein, mitochondrial OS=Homo sapiens GN=LRPPRC PE=1 SV=3	0	579.122	55.0215	80	285	80	1	1394	157.805	6.13	168	117
FALSE	High	Master Protein	Q7L2E3	Putative ATP-dependent RNA helicase DHX30 OS=Homo sapiens GN=DHX30 PE=1 SV=1	0	520.881	63.6516	80	304	80	1	1194	133.855	8.78	167	137
FALSE	High	Master Protein	Q01085	Nucleolysin TIAR OS=Homo sapiens GN=TIAL1 PE=1 SV=1	0	403.349	65.8667	26	425	21	1	375	41.564	7.74	165	260
FALSE	High	Master Protein	Q12906	Interleukin enhancer-binding factor 3 OS=Homo sapiens GN=ILF3 PE=1 SV=3	0	550.402	52.4609	53	391	46	1	894	95.279	8.76	163	228
FALSE	High	Master Protein	P11142	Heat shock cognate 71 kDa protein OS=Homo sapiens GN=HSPA8 PE=1 SV=1	0	522.388	61.6099	41	405	28	1	646	70.854	5.52	160	245
FALSE	High	Master Protein	P55795	Heterogeneous nuclear ribonucleoprotein H2 OS=Homo sapiens GN=HNRNPH2 PE=1 SV=1	0	325.995	57.9065	29	367	17	1	449	49.232	6.3	160	207
FALSE	High	Master Protein	P68032	Actin, alpha cardiac muscle 1 OS=Homo sapiens GN=ACTC1 PE=1 SV=1	0	404.294	51.9894	30	744	6	1	377	41.992	5.39	157	587
FALSE	High	Master Protein	P09651	Heterogeneous nuclear ribonucleoprotein A1 OS=Homo sapiens GN=HNRNPA1 PE=1 SV=5	0	637.269	67.4731	34	522	29	1	372	38.723	9.13	148	374
FALSE	High	Master Protein	Q92945	Far upstream element-binding protein 2 OS=Homo sapiens GN=KHSRP PE=1 SV=4	0	372.846	58.7904	38	299	35	1	711	73.07	7.3	147	152
FALSE	High	Master Protein	Q14103	Heterogeneous nuclear ribonucleoprotein D0 OS=Homo sapiens GN=HNRNPD PE=1 SV=1	0	316.801	47.8873	31	334	28	1	355	38.41	7.81	143	191
FALSE	High	Master Protein	P07437	Tubulin beta chain OS=Homo sapiens GN=TUBB PE=1 SV=2	0	414.639	63.964	32	312	5	1	444	49.639	4.89	143	169
FALSE	High	Master Protein	P35527	Keratin, type I cytoskeletal 9 OS=Homo sapiens GN=KRT9 PE=1 SV=3	0	261.312	58.427	32	333	31	1	623	62.027	5.24	140	193
FALSE	High	Master Protein	P68371	Tubulin beta-4B chain OS=Homo sapiens GN=TUBB4B PE=1 SV=1	0	418.352	63.8202	32	294	2	1	445	49.799	4.89	137	157
FALSE	High	Master Protein	P31942	Heterogeneous nuclear ribonucleoprotein H3 OS=Homo sapiens GN=HNRNPH3 PE=1 SV=2	0	350.49	71.3873	21	364	19	1	346	36.903	6.87	134	230
FALSE	High	Master Protein	Q9HCE1	Putative helicase MOV-10 OS=Homo sapiens GN=MOV10 PE=1 SV=2	0	525.89	66.6999	67	271	67	1	1003	113.599	8.82	131	140
FALSE	High	Master Protein	P11021	78 kDa glucose-regulated protein OS=Homo sapiens GN=HSPA5 PE=1 SV=2	0	465.003	59.3272	48	279	45	1	654	72.288	5.16	128	151
FALSE	High	Master Protein	P61247	40S ribosomal protein S3a OS=Homo sapiens GN=RPS3A PE=1 SV=2	0	390.231	81.4394	40	360	40	1	264	29.926	9.73	126	234
FALSE	High	Master Protein	P52597	Heterogeneous nuclear ribonucleoprotein F OS=Homo sapiens GN=HNRNPF PE=1 SV=3	0	245.804	55.4217	21	282	19	1	415	45.643	5.58	125	157
FALSE	High	Master Protein	O14979	Heterogeneous nuclear ribonucleoprotein D-like OS=Homo sapiens GN=HNRNPDL PE=1 SV=3	0	376.084	40	29	323	26	1	420	46.409	9.57	124	199
FALSE	High	Master Protein	Q9NZB2	Constitutive coactivator of PPAR-gamma-like protein 1 OS=Homo sapiens GN=FAM120A PE=1 SV=2	0	353.634	43.8283	46	185	45	1	1118	121.811	8.88	123	62
FALSE	High	Master Protein	Q8NEY1	Neuron navigator 1 OS=Homo sapiens GN=NAV1 PE=1 SV=2	0	466.864	44.2728	68	196	68	1	1877	202.347	8.07	122	74
FALSE	High	Master Protein	P51991	Heterogeneous nuclear ribonucleoprotein A3 OS=Homo sapiens GN=HNRNPA3 PE=1 SV=2	0	401.5	63.2275	35	331	32	1	378	39.571	9.01	121	210
FALSE	High	Master Protein	Q92804	TATA-binding protein-associated factor 2N OS=Homo sapiens GN=TAF15 PE=1 SV=1	0	352.689	49.1554	24	311	21	1	592	61.793	8.02	120	191
FALSE	High	Master Protein	Q9H9G7	Protein argonaute-3 OS=Homo sapiens GN=AGO3 PE=1 SV=2	0	450.827	64.5349	48	235	30	1	860	97.298	9.11	120	115
FALSE	High	Master Protein	P04350	Tubulin beta-4A chain OS=Homo sapiens GN=TUBB4A PE=1 SV=2	0	269.102	50.6757	24	239	2	1	444	49.554	4.88	117	122
FALSE	High	Master Protein	Q92499	ATP-dependent RNA helicase DDX1 OS=Homo sapiens GN=DDX1 PE=1 SV=2	0	665.311	68.3784	60	296	60	1	740	82.38	7.23	116	180
FALSE	High	Master Protein	P15880	40S ribosomal protein S2 OS=Homo sapiens GN=RPS2 PE=1 SV=2	0	320.43	68.942	33	278	33	1	293	31.305	10.24	114	164
FALSE	High	Master Protein	Q9BVA1	Tubulin beta-2B chain OS=Homo sapiens GN=TUBB2B PE=1 SV=1	0	337.455	54.6067	26	243	2	1	445	49.921	4.89	114	129
FALSE	High	Master Protein	P51531	Probable global transcription activator SNF2L2 OS=Homo sapiens GN=SMARCA2 PE=1 SV=2	0	497.503	36.4151	64	239	34	1	1590	181.166	7.2	113	126
FALSE	High	Master Protein	P0DMV9	Heat shock 70 kDa protein 1B OS=Homo sapiens GN=HSPA1B PE=1 SV=1	0	453.145	67.8627	45	260	25	1	641	70.009	5.66	110	150
FALSE	High	Master Protein	Q13885	Tubulin beta-2A chain OS=Homo sapiens GN=TUBB2A PE=1 SV=1	0	331.738	53.7079	25	240	1	1	445	49.875	4.89	110	130
FALSE	High	Master Protein	P31483	Nucleolysin TIA-1 isoform p40 OS=Homo sapiens GN=TIA1 PE=1 SV=3	0	295.611	61.658	20	289	15	1	386	42.936	7.74	109	180
FALSE	High	Master Protein	P62701	40S ribosomal protein S4, X isoform OS=Homo sapiens GN=RPS4X PE=1 SV=2	0	384.169	82.1293	38	310	38	1	263	29.579	10.15	106	204
FALSE	High	Master Protein	Q9NZI8	Insulin-like growth factor 2 mRNA-binding protein 1 OS=Homo sapiens GN=IGF2BP1 PE=1 SV=2	0	316.047	51.9931	33	229	30	1	577	63.441	9.2	106	123
FALSE	High	Master Protein	Q13283	Ras GTPase-activating protein-binding protein 1 OS=Homo sapiens GN=G3BP1 PE=1 SV=1	0	353.349	59.0129	25	301	24	1	466	52.132	5.52	105	196
FALSE	High	Master Protein	P21333	Filamin-A OS=Homo sapiens GN=FLNA PE=1 SV=4	0	499.445	40.0453	77	165	72	1	2647	280.564	6.06	103	62
FALSE	High	Master Protein	P14866	Heterogeneous nuclear ribonucleoprotein L OS=Homo sapiens GN=HNRNPL PE=1 SV=2	0	474.557	60.1019	32	235	31	1	589	64.092	8.22	102	133
FALSE	High	Master Protein	P08238	Heat shock protein HSP 90-beta OS=Homo sapiens GN=HSP90AB1 PE=1 SV=4	0	354.237	55.8011	47	222	30	1	724	83.212	5.03	102	120
FALSE	High	Master Protein	Q00610	Clathrin heavy chain 1 OS=Homo sapiens GN=CLTC PE=1 SV=5	0	444.834	42.9851	70	216	70	1	1675	191.493	5.69	102	114
FALSE	High	Master Protein	P53992	Protein transport protein Sec24C OS=Homo sapiens GN=SEC24C PE=1 SV=3	0	264.297	35.9232	31	167	30	1	1094	118.249	7.06	102	65
FALSE	High	Master Protein	P23396	40S ribosomal protein S3 OS=Homo sapiens GN=RPS3 PE=1 SV=2	0	321.899	87.6543	36	252	36	1	243	26.671	9.66	101	151
FALSE	High	Master Protein	Q9UL18	Protein argonaute-1 OS=Homo sapiens GN=AGO1 PE=1 SV=3	0	372.237	63.1272	44	201	24	1	857	97.152	9.16	100	101
FALSE	High	Master Protein	O14497	AT-rich interactive domain-containing protein 1A OS=Homo sapiens GN=ARID1A PE=1 SV=3	0	331.966	23.7637	47	122	43	1	2285	241.892	6.7	98	24
FALSE	High	Master Protein	P19338	Nucleolin OS=Homo sapiens GN=NCL PE=1 SV=3	0	364.105	40.5634	41	208	41	1	710	76.568	4.7	96	112
FALSE	High	Master Protein	P08621	U1 small nuclear ribonucleoprotein 70 kDa OS=Homo sapiens GN=SNRNP70 PE=1 SV=2	0	215.652	43.4783	26	283	26	1	437	51.526	9.94	95	188
FALSE	High	Master Protein	Q99729	Heterogeneous nuclear ribonucleoprotein A/B OS=Homo sapiens GN=HNRNPAB PE=1 SV=2	0	214.543	34.6386	20	222	19	1	332	36.202	8.21	95	127
FALSE	High	Master Protein	O95487	Protein transport protein Sec24B OS=Homo sapiens GN=SEC24B PE=1 SV=2	0	290.375	29.8107	35	135	31	1	1268	137.331	6.67	94	41
FALSE	High	Master Protein	Q71RC2	La-related protein 4 OS=Homo sapiens GN=LARP4 PE=1 SV=3	0	183.071	39.5028	27	171	27	1	724	80.546	6.61	91	80
FALSE	High	Master Protein	P36578	60S ribosomal protein L4 OS=Homo sapiens GN=RPL4 PE=1 SV=5	0	304.8	53.63	34	230	34	1	427	47.667	11.06	90	140
FALSE	High	Master Protein	P67809	Nuclease-sensitive element-binding protein 1 OS=Homo sapiens GN=YBX1 PE=1 SV=3	0	217.33	50.3086	21	230	9	1	324	35.903	9.88	89	141
FALSE	High	Master Protein	Q08380	Galectin-3-binding protein OS=Homo sapiens GN=LGALS3BP PE=1 SV=1	0	211.313	43.2479	21	177	21	1	585	65.289	5.27	89	88
FALSE	High	Master Protein	Q13813	Spectrin alpha chain, non-erythrocytic 1 OS=Homo sapiens GN=SPTAN1 PE=1 SV=3	0	386.317	31.068	72	140	72	1	2472	284.364	5.35	89	51
FALSE	High	Master Protein	P43243	Matrin-3 OS=Homo sapiens GN=MATR3 PE=1 SV=2	0	239.778	37.1901	31	139	31	1	847	94.565	6.25	88	51
FALSE	High	Master Protein	P16989	Y-box-binding protein 3 OS=Homo sapiens GN=YBX3 PE=1 SV=4	0	299.734	65.3226	27	221	15	1	372	40.066	9.77	85	136
FALSE	High	Master Protein	O43143	Pre-mRNA-splicing factor ATP-dependent RNA helicase DHX15 OS=Homo sapiens GN=DHX15 PE=1 SV=2	0	378.71	51.8239	46	227	45	1	795	90.875	7.46	84	143
FALSE	High	Master Protein	Q13509	Tubulin beta-3 chain OS=Homo sapiens GN=TUBB3 PE=1 SV=2	0	241.232	38.6667	19	164	2	1	450	50.4	4.93	84	80
FALSE	High	Master Protein	P07900	Heat shock protein HSP 90-alpha OS=Homo sapiens GN=HSP90AA1 PE=1 SV=5	0	257.455	43.1694	36	166	20	1	732	84.607	5.02	83	83
FALSE	High	Master Protein	Q12905	Interleukin enhancer-binding factor 2 OS=Homo sapiens GN=ILF2 PE=1 SV=2	0	381.624	75.1282	28	225	28	1	390	43.035	5.26	82	143
FALSE	High	Master Protein	Q15437	Protein transport protein Sec23B OS=Homo sapiens GN=SEC23B PE=1 SV=2	0	342.251	49.6741	32	182	29	1	767	86.424	6.89	82	100
FALSE	High	Master Protein	Q01082	Spectrin beta chain, non-erythrocytic 1 OS=Homo sapiens GN=SPTBN1 PE=1 SV=2	0	375.201	34.264	70	133	65	1	2364	274.439	5.57	82	51
FALSE	High	Master Protein	Q9NR30	Nucleolar RNA helicase 2 OS=Homo sapiens GN=DDX21 PE=1 SV=5	0	364.256	51.5964	44	200	41	1	783	87.29	9.28	81	119
FALSE	High	Master Protein	P52272	Heterogeneous nuclear ribonucleoprotein M OS=Homo sapiens GN=HNRNPM PE=1 SV=3	0	323.733	54.5205	36	201	36	1	730	77.464	8.7	80	121
FALSE	High	Master Protein	O00425	Insulin-like growth factor 2 mRNA-binding protein 3 OS=Homo sapiens GN=IGF2BP3 PE=1 SV=2	0	313.65	56.8221	35	201	29	1	579	63.666	8.87	80	121
FALSE	High	Master Protein	P02533	Keratin, type I cytoskeletal 14 OS=Homo sapiens GN=KRT14 PE=1 SV=4	0	125.296	51.9068	29	232	7	1	472	51.529	5.16	79	153
FALSE	High	Master Protein	Q96I24	Far upstream element-binding protein 3 OS=Homo sapiens GN=FUBP3 PE=1 SV=2	0	298.85	63.986	32	174	30	1	572	61.602	8.38	79	95
FALSE	High	Master Protein	P24928	DNA-directed RNA polymerase II subunit RPB1 OS=Homo sapiens GN=POLR2A PE=1 SV=2	0	340.542	37.0558	64	146	64	1	1970	217.039	7.37	78	68
FALSE	High	Master Protein	Q8IXB1	DnaJ homolog subfamily C member 10 OS=Homo sapiens GN=DNAJC10 PE=1 SV=2	0	284.249	41.1097	36	164	36	1	793	91.021	7.18	77	87
FALSE	High	Master Protein	Q3ZCM7	Tubulin beta-8 chain OS=Homo sapiens GN=TUBB8 PE=1 SV=2	0	116.622	21.8468	12	158	2	1	444	49.744	4.89	77	81
FALSE	High	Master Protein	Q15717	ELAV-like protein 1 OS=Homo sapiens GN=ELAVL1 PE=1 SV=2	0	285.849	62.5767	25	161	23	1	326	36.069	9.17	76	85
FALSE	High	Master Protein	A5A3E0	POTE ankyrin domain family member F OS=Homo sapiens GN=POTEF PE=1 SV=2	0	111.905	13.6744	13	328	2	1	1075	121.367	6.2	75	253
FALSE	High	Master Protein	Q7Z2W4	Zinc finger CCCH-type antiviral protein 1 OS=Homo sapiens GN=ZC3HAV1 PE=1 SV=3	0	288.853	44.1242	37	212	37	1	902	101.367	8.4	75	137
FALSE	High	Master Protein	P13647	Keratin, type II cytoskeletal 5 OS=Homo sapiens GN=KRT5 PE=1 SV=3	0	153.29	42.0339	31	212	15	1	590	62.34	7.74	75	137
FALSE	High	Master Protein	Q15436	Protein transport protein Sec23A OS=Homo sapiens GN=SEC23A PE=1 SV=2	0	302.829	46.6667	31	184	28	1	765	86.105	7.08	74	110
FALSE	High	Master Protein	Q14157	Ubiquitin-associated protein 2-like OS=Homo sapiens GN=UBAP2L PE=1 SV=2	0	179.945	26.6789	22	119	22	1	1087	114.465	7.11	74	45
FALSE	High	Master Protein	Q9BQE3	Tubulin alpha-1C chain OS=Homo sapiens GN=TUBA1C PE=1 SV=1	0	257.783	51.0022	27	169	11	1	449	49.863	5.1	73	96
FALSE	High	Master Protein	Q07666	KH domain-containing, RNA-binding, signal transduction-associated protein 1 OS=Homo sapiens GN=KHDRBS1 PE=1 SV=1	0	211.429	40.4063	19	176	18	1	443	48.197	8.66	72	104
FALSE	High	Master Protein	P46781	40S ribosomal protein S9 OS=Homo sapiens GN=RPS9 PE=1 SV=3	0	146.053	59.2784	27	165	27	1	194	22.578	10.65	72	93
FALSE	High	Master Protein	Q14444	Caprin-1 OS=Homo sapiens GN=CAPRIN1 PE=1 SV=2	0	270.372	40.0564	26	151	26	1	709	78.318	5.25	72	79
FALSE	High	Master Protein	P49327	Fatty acid synthase OS=Homo sapiens GN=FASN PE=1 SV=3	0	269.161	26.1649	53	87	52	1	2511	273.254	6.44	72	15
FALSE	High	Master Protein	Q8NDV7	Trinucleotide repeat-containing gene 6A protein OS=Homo sapiens GN=TNRC6A PE=1 SV=2	0	426.998	37.105	52	154	51	1	1962	210.169	7.01	71	83
FALSE	High	Master Protein	P04259	Keratin, type II cytoskeletal 6B OS=Homo sapiens GN=KRT6B PE=1 SV=5	0	177.007	48.227	32	208	3	1	564	60.03	8	70	138
FALSE	High	Master Protein	P02538	Keratin, type II cytoskeletal 6A OS=Homo sapiens GN=KRT6A PE=1 SV=3	0	172.96	48.227	32	205	4	1	564	60.008	8	70	135
FALSE	High	Master Protein	P05787	Keratin, type II cytoskeletal 8 OS=Homo sapiens GN=KRT8 PE=1 SV=7	0	273.806	55.9006	41	187	29	1	483	53.671	5.59	69	118
FALSE	High	Master Protein	Q96EP5	DAZ-associated protein 1 OS=Homo sapiens GN=DAZAP1 PE=1 SV=1	0	293.422	44.9631	19	175	19	1	407	43.356	8.56	68	107
FALSE	High	Master Protein	Q562R1	Beta-actin-like protein 2 OS=Homo sapiens GN=ACTBL2 PE=1 SV=2	0	132.844	43.0851	15	299	5	1	376	41.976	5.59	67	232
FALSE	High	Master Protein	P08779	Keratin, type I cytoskeletal 16 OS=Homo sapiens GN=KRT16 PE=1 SV=4	0	126.277	47.7801	26	204	9	1	473	51.236	5.05	67	137
FALSE	High	Master Protein	P10809	60 kDa heat shock protein, mitochondrial OS=Homo sapiens GN=HSPD1 PE=1 SV=2	0	433.952	72.7749	43	165	43	1	573	61.016	5.87	67	98
FALSE	High	Master Protein	P0CG38	POTE ankyrin domain family member I OS=Homo sapiens GN=POTEI PE=3 SV=1	0	106.129	13.9535	13	281	1	1	1075	121.205	6.21	66	215
FALSE	High	Master Protein	Q13151	Heterogeneous nuclear ribonucleoprotein A0 OS=Homo sapiens GN=HNRNPA0 PE=1 SV=1	0	230.293	52.1311	20	218	18	1	305	30.822	9.29	66	152
FALSE	High	Master Protein	Q8WWM7	Ataxin-2-like protein OS=Homo sapiens GN=ATXN2L PE=1 SV=2	0	183.081	30.3256	30	107	30	1	1075	113.304	8.59	66	41
FALSE	High	Master Protein	Q96AE4	Far upstream element-binding protein 1 OS=Homo sapiens GN=FUBP1 PE=1 SV=3	0	176.877	50.1553	28	132	23	1	644	67.518	7.61	65	67
FALSE	High	Master Protein	P38159	RNA-binding motif protein, X chromosome OS=Homo sapiens GN=RBMX PE=1 SV=3	0	237.676	52.4297	28	179	12	1	391	42.306	10.05	64	115
FALSE	High	Master Protein	Q02878	60S ribosomal protein L6 OS=Homo sapiens GN=RPL6 PE=1 SV=3	0	133.302	52.7778	22	179	22	1	288	32.708	10.58	64	115
FALSE	High	Master Protein	O75369	Filamin-B OS=Homo sapiens GN=FLNB PE=1 SV=2	0	245.601	26.2106	57	88	52	1	2602	277.99	5.73	64	24
FALSE	High	Master Protein	P35580	Myosin-10 OS=Homo sapiens GN=MYH10 PE=1 SV=3	0	969.311	52.581	111	366	76	1	1976	228.858	5.54	63	303
FALSE	High	Master Protein	P05783	Keratin, type I cytoskeletal 18 OS=Homo sapiens GN=KRT18 PE=1 SV=2	0	304.809	73.0233	35	181	34	1	430	48.029	5.45	63	118
FALSE	High	Master Protein	P15924	Desmoplakin OS=Homo sapiens GN=DSP PE=1 SV=3	0	255.274	24.4514	73	132	73	1	2871	331.569	6.81	63	69
FALSE	High	Master Protein	O75127	Pentatricopeptide repeat-containing protein 1, mitochondrial OS=Homo sapiens GN=PTCD1 PE=1 SV=2	0	263.463	49.7143	36	116	36	1	700	78.806	8.59	63	53
FALSE	High	Master Protein	P08865	40S ribosomal protein SA OS=Homo sapiens GN=RPSA PE=1 SV=4	0	248.194	61.6949	18	153	18	1	295	32.833	4.87	62	91
FALSE	High	Master Protein	P68366	Tubulin alpha-4A chain OS=Homo sapiens GN=TUBA4A PE=1 SV=1	0	251.969	48.6607	25	146	9	1	448	49.892	5.06	62	84
FALSE	High	Master Protein	P68104	Elongation factor 1-alpha 1 OS=Homo sapiens GN=EEF1A1 PE=1 SV=1	0	128.357	37.4459	16	129	16	1	462	50.109	9.01	62	67
FALSE	High	Master Protein	Q14258	E3 ubiquitin/ISG15 ligase TRIM25 OS=Homo sapiens GN=TRIM25 PE=1 SV=2	0	287.114	53.1746	38	135	38	1	630	70.928	8.09	61	74
FALSE	High	Master Protein	Q9H2U1	ATP-dependent RNA helicase DHX36 OS=Homo sapiens GN=DHX36 PE=1 SV=2	0	330.839	39.5833	38	142	36	1	1008	114.688	7.68	60	82
FALSE	High	Master Protein	P07910	Heterogeneous nuclear ribonucleoproteins C1/C2 OS=Homo sapiens GN=HNRNPC PE=1 SV=4	0	119.307	32.6797	14	137	14	1	306	33.65	5.08	60	77
FALSE	High	Master Protein	Q07955	Serine/arginine-rich splicing factor 1 OS=Homo sapiens GN=SRSF1 PE=1 SV=2	0	171.23	54.4355	23	129	22	1	248	27.728	10.36	60	69
FALSE	High	Master Protein	Q16531	DNA damage-binding protein 1 OS=Homo sapiens GN=DDB1 PE=1 SV=1	0	236.918	34.9123	40	96	40	1	1140	126.887	5.26	60	36
FALSE	High	Master Protein	Q1KMD3	Heterogeneous nuclear ribonucleoprotein U-like protein 2 OS=Homo sapiens GN=HNRNPUL2 PE=1 SV=1	0	197.219	30.5221	32	116	32	1	747	85.052	4.91	59	57
FALSE	High	Master Protein	P23246	Splicing factor, proline- and glutamine-rich OS=Homo sapiens GN=SFPQ PE=1 SV=2	0	201.382	27.5813	26	130	25	1	707	76.102	9.44	58	72
FALSE	High	Master Protein	Q04637	Eukaryotic translation initiation factor 4 gamma 1 OS=Homo sapiens GN=EIF4G1 PE=1 SV=4	0	234.324	28.5804	40	110	34	1	1599	175.382	5.33	58	52
FALSE	High	Master Protein	P16402	Histone H1.3 OS=Homo sapiens GN=HIST1H1D PE=1 SV=2	0	106.78	31.6742	15	183	10	1	221	22.336	11.02	57	126
FALSE	High	Master Protein	P04406	Glyceraldehyde-3-phosphate dehydrogenase OS=Homo sapiens GN=GAPDH PE=1 SV=3	0	207.597	52.5373	19	130	18	1	335	36.03	8.46	57	73
FALSE	High	Master Protein	Q86X55	Histone-arginine methyltransferase CARM1 OS=Homo sapiens GN=CARM1 PE=1 SV=3	0	236.501	40.7895	22	98	22	1	608	65.811	6.73	57	41
FALSE	High	Master Protein	P39023	60S ribosomal protein L3 OS=Homo sapiens GN=RPL3 PE=1 SV=2	0	211.5	51.3648	28	161	28	1	403	46.08	10.18	56	105
FALSE	High	Master Protein	P55265	Double-stranded RNA-specific adenosine deaminase OS=Homo sapiens GN=ADAR PE=1 SV=4	0	236.198	35.8891	46	124	46	1	1226	135.981	8.65	56	68
FALSE	High	Master Protein	Q9BUF5	Tubulin beta-6 chain OS=Homo sapiens GN=TUBB6 PE=1 SV=1	0	140.073	31.6143	15	115	7	1	446	49.825	4.88	56	59
FALSE	High	Master Protein	Q09161	Nuclear cap-binding protein subunit 1 OS=Homo sapiens GN=NCBP1 PE=1 SV=1	0	316.865	44.3038	31	132	31	1	790	91.781	6.43	55	77
FALSE	High	Master Protein	P13639	Elongation factor 2 OS=Homo sapiens GN=EEF2 PE=1 SV=4	0	192.912	39.9767	32	84	31	1	858	95.277	6.83	55	29
FALSE	High	Master Protein	P09012	U1 small nuclear ribonucleoprotein A OS=Homo sapiens GN=SNRPA PE=1 SV=3	0	317.912	43.9716	17	187	14	1	282	31.259	9.83	54	133
FALSE	High	Master Protein	Q96SI9	Spermatid perinuclear RNA-binding protein OS=Homo sapiens GN=STRBP PE=1 SV=1	0	176.711	43.6012	29	117	22	1	672	73.606	8.72	54	63
FALSE	High	Master Protein	Q15149	Plectin OS=Homo sapiens GN=PLEC PE=1 SV=3	0	200.705	14.7096	63	93	59	1	4684	531.466	5.96	54	39
FALSE	High	Master Protein	Q92922	SWI/SNF complex subunit SMARCC1 OS=Homo sapiens GN=SMARCC1 PE=1 SV=3	0	136.384	21.1765	24	71	13	1	1105	122.79	5.76	54	17
FALSE	High	Master Protein	P51398	28S ribosomal protein S29, mitochondrial OS=Homo sapiens GN=DAP3 PE=1 SV=1	0	245.116	55.7789	29	108	29	1	398	45.538	8.88	53	55
FALSE	High	Master Protein	Q96KR1	Zinc finger RNA-binding protein OS=Homo sapiens GN=ZFR PE=1 SV=2	0	200.773	28.3054	29	108	29	1	1074	116.939	9.04	53	55
FALSE	High	Master Protein	Q9NUL7	Probable ATP-dependent RNA helicase DDX28 OS=Homo sapiens GN=DDX28 PE=1 SV=2	0	197.232	58.1481	28	103	28	1	540	59.545	10.42	53	50
FALSE	High	Master Protein	O00159	Unconventional myosin-Ic OS=Homo sapiens GN=MYO1C PE=1 SV=4	0	571.234	56.8203	78	201	77	1	1063	121.606	9.41	52	149
FALSE	High	Master Protein	Q9UN86	Ras GTPase-activating protein-binding protein 2 OS=Homo sapiens GN=G3BP2 PE=1 SV=2	0	242.666	55.1867	22	163	21	1	482	54.088	5.55	52	111
FALSE	High	Master Protein	Q7Z739	YTH domain-containing family protein 3 OS=Homo sapiens GN=YTHDF3 PE=1 SV=1	0	249.337	41.5385	23	122	15	1	585	63.822	9.04	52	70
FALSE	High	Master Protein	Q6P2Q9	Pre-mRNA-processing-splicing factor 8 OS=Homo sapiens GN=PRPF8 PE=1 SV=2	0	199.764	22.9122	53	91	53	1	2335	273.427	8.84	52	39
FALSE	High	Master Protein	P51114	Fragile X mental retardation syndrome-related protein 1 OS=Homo sapiens GN=FXR1 PE=1 SV=3	0	175.686	44.6055	23	135	20	1	621	69.678	6.15	51	84
FALSE	High	Master Protein	Q8WVM0	Dimethyladenosine transferase 1, mitochondrial OS=Homo sapiens GN=TFB1M PE=1 SV=1	0	197.907	60.1156	26	121	26	1	346	39.518	9.26	51	70
FALSE	High	Master Protein	P28799	Granulins OS=Homo sapiens GN=GRN PE=1 SV=2	0	113.207	25.9696	16	111	16	1	593	63.5	6.83	51	60
FALSE	High	Master Protein	Q86UA1	Pre-mRNA-processing factor 39 OS=Homo sapiens GN=PRPF39 PE=1 SV=3	0	193.269	45.142	30	108	30	1	669	78.381	5.4	51	57
FALSE	High	Master Protein	P34931	Heat shock 70 kDa protein 1-like OS=Homo sapiens GN=HSPA1L PE=1 SV=2	0	159.175	29.1732	16	122	2	1	641	70.331	6.02	50	72
FALSE	High	Master Protein	P54652	Heat shock-related 70 kDa protein 2 OS=Homo sapiens GN=HSPA2 PE=1 SV=1	0	115.697	17.3709	14	120	2	1	639	69.978	5.74	50	70
FALSE	High	Master Protein	O43148	mRNA cap guanine-N7 methyltransferase OS=Homo sapiens GN=RNMT PE=1 SV=1	0	149.972	40.7563	21	105	21	1	476	54.809	6.61	50	55
FALSE	High	Master Protein	Q9NYY8	FAST kinase domain-containing protein 2 OS=Homo sapiens GN=FASTKD2 PE=1 SV=1	0	260.491	45.6338	28	98	28	1	710	81.41	8.05	50	48
FALSE	High	Master Protein	P26599	Polypyrimidine tract-binding protein 1 OS=Homo sapiens GN=PTBP1 PE=1 SV=1	0	226.12	51.6008	20	115	17	1	531	57.186	9.17	49	66
FALSE	High	Master Protein	O75534	Cold shock domain-containing protein E1 OS=Homo sapiens GN=CSDE1 PE=1 SV=2	0	200.884	46.2406	37	112	37	1	798	88.829	6.25	49	63
FALSE	High	Master Protein	Q14764	Major vault protein OS=Homo sapiens GN=MVP PE=1 SV=4	0	181.622	45.4647	33	75	33	1	893	99.266	5.48	49	26
FALSE	High	Master Protein	P0CG39	POTE ankyrin domain family member J OS=Homo sapiens GN=POTEJ PE=3 SV=1	0	103.123	13.3911	12	201	2	1	1038	117.315	5.97	48	153
FALSE	High	Master Protein	Q15233	Non-POU domain-containing octamer-binding protein OS=Homo sapiens GN=NONO PE=1 SV=4	0	241.136	52.8662	29	132	27	1	471	54.197	8.95	47	85
FALSE	High	Master Protein	Q04695	Keratin, type I cytoskeletal 17 OS=Homo sapiens GN=KRT17 PE=1 SV=2	0	90.96	39.3519	24	152	10	1	432	48.076	5.02	46	106
FALSE	High	Master Protein	Q9Y5X1	Sorting nexin-9 OS=Homo sapiens GN=SNX9 PE=1 SV=1	0	307.411	52.605	29	101	29	1	595	66.55	5.58	46	55
FALSE	High	Master Protein	P63244	Guanine nucleotide-binding protein subunit beta-2-like 1 OS=Homo sapiens GN=GNB2L1 PE=1 SV=3	0	190.663	72.2397	22	86	22	1	317	35.055	7.69	46	40
FALSE	High	Master Protein	Q8TAQ2	SWI/SNF complex subunit SMARCC2 OS=Homo sapiens GN=SMARCC2 PE=1 SV=1	0	138.682	17.71	23	65	12	1	1214	132.797	5.69	46	19
FALSE	High	Master Protein	Q9Y3I0	tRNA-splicing ligase RtcB homolog OS=Homo sapiens GN=RTCB PE=1 SV=1	0	196.544	46.1386	23	140	23	1	505	55.175	7.23	45	95
FALSE	High	Master Protein	O75643	U5 small nuclear ribonucleoprotein 200 kDa helicase OS=Homo sapiens GN=SNRNP200 PE=1 SV=2	0	406.328	36.7978	69	128	69	1	2136	244.353	6.06	45	83
FALSE	High	Master Protein	P62280	40S ribosomal protein S11 OS=Homo sapiens GN=RPS11 PE=1 SV=3	0	153.419	75.9494	25	124	25	1	158	18.419	10.3	45	79
FALSE	High	Master Protein	Q8NCA5	Protein FAM98A OS=Homo sapiens GN=FAM98A PE=1 SV=1	0	160.087	42.0039	18	116	16	1	519	55.366	9.03	45	71
FALSE	High	Master Protein	Q8WWI1	LIM domain only protein 7 OS=Homo sapiens GN=LMO7 PE=1 SV=3	0	190.366	24.896	36	114	36	1	1683	192.576	8.09	45	69
FALSE	High	Master Protein	Q9HCK5	Protein argonaute-4 OS=Homo sapiens GN=AGO4 PE=1 SV=2	0	134.477	17.8862	15	89	1	1	861	97.035	9.06	45	44
FALSE	High	Master Protein	P30876	DNA-directed RNA polymerase II subunit RPB2 OS=Homo sapiens GN=POLR2B PE=1 SV=1	0	193.406	29.983	36	75	36	1	1174	133.811	6.87	45	30
FALSE	High	Master Protein	P14618	Pyruvate kinase PKM OS=Homo sapiens GN=PKM PE=1 SV=4	0	213.638	52.919	23	69	23	1	531	57.9	7.84	45	24
FALSE	High	Master Protein	P35749	Myosin-11 OS=Homo sapiens GN=MYH11 PE=1 SV=3	0	220.377	13.0832	29	164	2	1	1972	227.199	5.5	44	120
FALSE	High	Master Protein	P27635	60S ribosomal protein L10 OS=Homo sapiens GN=RPL10 PE=1 SV=4	0	122.532	53.7383	20	106	20	1	214	24.588	10.08	44	62
FALSE	High	Master Protein	Q9Y4F3	Meiosis arrest female protein 1 OS=Homo sapiens GN=KIAA0430 PE=1 SV=6	0	221.299	30.3674	46	101	46	1	1742	192.737	7.87	44	57
FALSE	High	Master Protein	Q12965	Unconventional myosin-Ie OS=Homo sapiens GN=MYO1E PE=1 SV=2	0	362.726	45.6679	55	137	55	1	1108	126.982	8.92	43	94
FALSE	High	Master Protein	Q9HC36	rRNA methyltransferase 3, mitochondrial OS=Homo sapiens GN=RNMTL1 PE=1 SV=2	0	188.377	37.8571	20	105	20	1	420	46.99	8.73	43	62
FALSE	High	Master Protein	O95900	Probable tRNA pseudouridine synthase 2 OS=Homo sapiens GN=TRUB2 PE=1 SV=1	0	180.007	58.9124	20	97	20	1	331	36.671	8.98	43	54
FALSE	High	Master Protein	Q9Y3B7	39S ribosomal protein L11, mitochondrial OS=Homo sapiens GN=MRPL11 PE=1 SV=1	0	201.365	80.2083	24	81	24	1	192	20.67	9.91	43	38
FALSE	High	Master Protein	Q7Z406	Myosin-14 OS=Homo sapiens GN=MYH14 PE=1 SV=2	0	108.764	7.66917	20	133	1	1	1995	227.732	5.6	42	91
FALSE	High	Master Protein	Q9BYJ9	YTH domain-containing family protein 1 OS=Homo sapiens GN=YTHDF1 PE=1 SV=1	0	202.627	35.0626	18	102	10	1	559	60.836	8.79	42	60
FALSE	High	Master Protein	P62750	60S ribosomal protein L23a OS=Homo sapiens GN=RPL23A PE=1 SV=1	0	129.358	45.5128	16	100	16	1	156	17.684	10.45	42	58
FALSE	High	Master Protein	Q7Z794	Keratin, type II cytoskeletal 1b OS=Homo sapiens GN=KRT77 PE=2 SV=3	0	27.4741	8.13149	6	96	2	1	578	61.864	5.99	42	54
FALSE	High	Master Protein	Q15393	Splicing factor 3B subunit 3 OS=Homo sapiens GN=SF3B3 PE=1 SV=4	0	161.28	27.198	30	84	30	1	1217	135.492	5.26	42	42
FALSE	High	Master Protein	P02786	Transferrin receptor protein 1 OS=Homo sapiens GN=TFRC PE=1 SV=2	0	130.964	35.5263	23	67	23	1	760	84.818	6.61	42	25
FALSE	High	Master Protein	P07355	Annexin A2 OS=Homo sapiens GN=ANXA2 PE=1 SV=2	0	200.144	67.2566	29	123	29	1	339	38.58	7.75	41	82
FALSE	High	Master Protein	P08729	Keratin, type II cytoskeletal 7 OS=Homo sapiens GN=KRT7 PE=1 SV=5	0	156.836	50.9595	32	113	23	1	469	51.354	5.48	41	72
FALSE	High	Master Protein	P18124	60S ribosomal protein L7 OS=Homo sapiens GN=RPL7 PE=1 SV=1	0	102.045	57.2581	20	99	20	1	248	29.207	10.65	41	58
FALSE	High	Master Protein	O43823	A-kinase anchor protein 8 OS=Homo sapiens GN=AKAP8 PE=1 SV=1	0	137.058	32.8035	22	71	22	1	692	76.061	5.15	41	30
FALSE	High	Master Protein	P62424	60S ribosomal protein L7a OS=Homo sapiens GN=RPL7A PE=1 SV=2	0	181.731	55.2632	27	130	27	1	266	29.977	10.61	40	90
FALSE	High	Master Protein	Q7Z417	Nuclear fragile X mental retardation-interacting protein 2 OS=Homo sapiens GN=NUFIP2 PE=1 SV=1	0	210.668	48.6331	27	109	27	1	695	76.075	8.7	40	69
FALSE	High	Master Protein	P40429	60S ribosomal protein L13a OS=Homo sapiens GN=RPL13A PE=1 SV=2	0	83.8101	53.202	18	97	18	1	203	23.562	10.93	40	57
FALSE	High	Master Protein	Q96EY7	Pentatricopeptide repeat domain-containing protein 3, mitochondrial OS=Homo sapiens GN=PTCD3 PE=1 SV=3	0	257.822	47.1698	28	91	28	1	689	78.5	6.42	40	51
FALSE	High	Master Protein	Q02809	Procollagen-lysine,2-oxoglutarate 5-dioxygenase 1 OS=Homo sapiens GN=PLOD1 PE=1 SV=2	0	164.725	48.0055	29	85	29	1	727	83.497	6.95	40	45
FALSE	High	Master Protein	P02545	Prelamin-A/C OS=Homo sapiens GN=LMNA PE=1 SV=1	0	148.461	46.5361	29	81	28	1	664	74.095	7.02	40	41
FALSE	High	Master Protein	Q92615	La-related protein 4B OS=Homo sapiens GN=LARP4B PE=1 SV=3	0	132.452	26.4228	19	72	19	1	738	80.503	6.92	40	32
FALSE	High	Master Protein	Q96E39	RNA binding motif protein, X-linked-like-1 OS=Homo sapiens GN=RBMXL1 PE=1 SV=1	0	144.672	46.4103	22	114	6	1	390	42.116	9.89	39	75
FALSE	High	Master Protein	P62753	40S ribosomal protein S6 OS=Homo sapiens GN=RPS6 PE=1 SV=1	0	255.896	47.3896	21	109	21	1	249	28.663	10.84	39	70
FALSE	High	Master Protein	P17066	Heat shock 70 kDa protein 6 OS=Homo sapiens GN=HSPA6 PE=1 SV=2	0	88.0661	17.2628	13	101	1	1	643	70.984	6.14	39	62
FALSE	High	Master Protein	Q15366	Poly(rC)-binding protein 2 OS=Homo sapiens GN=PCBP2 PE=1 SV=1	0	133.928	50.6849	13	96	6	1	365	38.556	6.79	39	57
FALSE	High	Master Protein	P62081	40S ribosomal protein S7 OS=Homo sapiens GN=RPS7 PE=1 SV=1	0	99.1707	64.9485	23	84	23	1	194	22.113	10.1	39	45
FALSE	High	Master Protein	P25705	ATP synthase subunit alpha, mitochondrial OS=Homo sapiens GN=ATP5A1 PE=1 SV=1	0	139.632	40.868	23	80	23	1	553	59.714	9.13	39	41
FALSE	High	Master Protein	Q96E29	Transcription termination factor 3, mitochondrial OS=Homo sapiens GN=MTERF3 PE=1 SV=2	0	142.165	46.7626	24	79	24	1	417	47.941	8.53	39	40
FALSE	High	Master Protein	P13646	Keratin, type I cytoskeletal 13 OS=Homo sapiens GN=KRT13 PE=1 SV=4	0	34.1251	13.3188	9	96	2	1	458	49.557	4.96	38	58
FALSE	High	Master Protein	Q13435	Splicing factor 3B subunit 2 OS=Homo sapiens GN=SF3B2 PE=1 SV=2	0	136.94	25.4749	25	77	25	1	895	100.165	5.67	38	39
FALSE	High	Master Protein	P08195	4F2 cell-surface antigen heavy chain OS=Homo sapiens GN=SLC3A2 PE=1 SV=3	0	106.576	25.7143	17	70	17	1	630	67.952	5.01	38	32
FALSE	High	Master Protein	Q6P158	Putative ATP-dependent RNA helicase DHX57 OS=Homo sapiens GN=DHX57 PE=1 SV=2	0	117.483	18.9755	27	57	25	1	1386	155.507	7.71	38	19
FALSE	High	Master Protein	P05556	Integrin beta-1 OS=Homo sapiens GN=ITGB1 PE=1 SV=2	0	80.381	18.1704	13	49	13	1	798	88.357	5.39	38	11
FALSE	High	Master Protein	Q01844	RNA-binding protein EWS OS=Homo sapiens GN=EWSR1 PE=1 SV=1	0	349.725	25.1524	18	339	18	1	656	68.436	9.33	37	302
FALSE	High	Master Protein	Q9UHB6	LIM domain and actin-binding protein 1 OS=Homo sapiens GN=LIMA1 PE=1 SV=1	0	317.566	55.9947	42	182	42	1	759	85.173	6.84	37	145
FALSE	High	Master Protein	O76021	Ribosomal L1 domain-containing protein 1 OS=Homo sapiens GN=RSL1D1 PE=1 SV=3	0	159.555	39.1837	23	93	23	1	490	54.939	10.13	37	56
FALSE	High	Master Protein	P17812	CTP synthase 1 OS=Homo sapiens GN=CTPS1 PE=1 SV=2	0	187.352	43.9932	27	73	25	1	591	66.648	6.46	37	36
FALSE	High	Master Protein	Q92925	SWI/SNF-related matrix-associated actin-dependent regulator of chromatin subfamily D member 2 OS=Homo sapiens GN=SMARCD2 PE=1 SV=3	0	178.954	43.8795	26	69	21	1	531	58.884	9.64	37	32
FALSE	High	Master Protein	P61254	60S ribosomal protein L26 OS=Homo sapiens GN=RPL26 PE=1 SV=1	0	82.4415	57.2414	15	90	15	1	145	17.248	10.55	36	54
FALSE	High	Master Protein	P82933	28S ribosomal protein S9, mitochondrial OS=Homo sapiens GN=MRPS9 PE=1 SV=2	0	194.104	50.2525	22	86	22	1	396	45.806	9.51	36	50
FALSE	High	Master Protein	Q8TCS8	Polyribonucleotide nucleotidyltransferase 1, mitochondrial OS=Homo sapiens GN=PNPT1 PE=1 SV=2	0	160.605	41.2516	30	80	30	1	783	85.897	7.77	36	44
FALSE	High	Master Protein	O96019	Actin-like protein 6A OS=Homo sapiens GN=ACTL6A PE=1 SV=1	0	151.257	37.9953	16	65	16	1	429	47.43	5.6	36	29
FALSE	High	Master Protein	O43795	Unconventional myosin-Ib OS=Homo sapiens GN=MYO1B PE=1 SV=3	0	350.668	40.669	49	114	44	1	1136	131.902	9.38	35	79
FALSE	High	Master Protein	O95429	BAG family molecular chaperone regulator 4 OS=Homo sapiens GN=BAG4 PE=1 SV=1	0	159.553	47.7024	17	77	16	1	457	49.563	5.12	35	42
FALSE	High	Master Protein	O75616	GTPase Era, mitochondrial OS=Homo sapiens GN=ERAL1 PE=1 SV=2	0	154.389	48.9703	22	76	22	1	437	48.319	8.84	35	41
FALSE	High	Master Protein	Q08J23	tRNA (cytosine(34)-C(5))-methyltransferase OS=Homo sapiens GN=NSUN2 PE=1 SV=2	0	164.336	46.545	29	75	29	1	767	86.416	6.77	35	40
FALSE	High	Master Protein	Q9NYK5	39S ribosomal protein L39, mitochondrial OS=Homo sapiens GN=MRPL39 PE=1 SV=3	0	146.254	52.3669	20	73	20	1	338	38.687	7.65	35	38
FALSE	High	Master Protein	Q9H0J9	Poly [ADP-ribose] polymerase 12 OS=Homo sapiens GN=PARP12 PE=1 SV=1	0	142.709	36.8046	24	61	24	1	701	79.013	8.51	35	26
FALSE	High	Master Protein	Q5T6F2	Ubiquitin-associated protein 2 OS=Homo sapiens GN=UBAP2 PE=1 SV=1	0	95.9384	19.571	14	53	14	1	1119	117.044	7.34	35	18
FALSE	High	Master Protein	Q96HB5	Coiled-coil domain-containing protein 120 OS=Homo sapiens GN=CCDC120 PE=1 SV=1	0	516.158	72.0635	46	355	46	1	630	67.526	9.38	34	321
FALSE	High	Master Protein	Q9Y6M1	Insulin-like growth factor 2 mRNA-binding protein 2 OS=Homo sapiens GN=IGF2BP2 PE=1 SV=2	0	160.613	42.0701	23	104	18	1	599	66.081	8.46	34	70
FALSE	High	Master Protein	P02768	Serum albumin OS=Homo sapiens GN=ALB PE=1 SV=2	0	36.3111	10.8374	8	74	8	1	609	69.321	6.28	34	40
FALSE	High	Master Protein	Q16629	Serine/arginine-rich splicing factor 7 OS=Homo sapiens GN=SRSF7 PE=1 SV=1	0	78.529	34.4538	10	72	9	1	238	27.35	11.82	34	38
FALSE	High	Master Protein	P62805	Histone H4 OS=Homo sapiens GN=HIST1H4A PE=1 SV=2	0	47.8565	55.3398	7	69	7	1	103	11.36	11.36	34	35
FALSE	High	Master Protein	O75533	Splicing factor 3B subunit 1 OS=Homo sapiens GN=SF3B1 PE=1 SV=3	0	144.347	28.4509	33	64	33	1	1304	145.738	7.09	34	30
FALSE	High	Master Protein	Q8NFD5	AT-rich interactive domain-containing protein 1B OS=Homo sapiens GN=ARID1B PE=1 SV=2	0	120.014	13.3721	27	47	23	1	2236	235.974	6.73	34	13
FALSE	High	Master Protein	P78527	DNA-dependent protein kinase catalytic subunit OS=Homo sapiens GN=PRKDC PE=1 SV=3	0	108.94	8.18798	34	35	34	1	4128	468.788	7.12	34	1
FALSE	High	Master Protein	P08670	Vimentin OS=Homo sapiens GN=VIM PE=1 SV=4	0	410.596	80.0429	53	224	48	1	466	53.619	5.12	33	191
FALSE	High	Master Protein	P62917	60S ribosomal protein L8 OS=Homo sapiens GN=RPL8 PE=1 SV=2	0	121.541	58.7549	17	96	17	1	257	28.007	11.03	33	63
FALSE	High	Master Protein	P48634	Protein PRRC2A OS=Homo sapiens GN=PRRC2A PE=1 SV=3	0	201.151	24.6175	37	87	37	1	2157	228.724	9.45	33	54
FALSE	High	Master Protein	Q14247	Src substrate cortactin OS=Homo sapiens GN=CTTN PE=1 SV=2	0	128.301	38.3636	24	81	24	1	550	61.549	5.4	33	48
FALSE	High	Master Protein	Q9HCJ0	Trinucleotide repeat-containing gene 6C protein OS=Homo sapiens GN=TNRC6C PE=1 SV=3	0	199.046	29.3491	32	74	31	1	1690	175.857	6.96	33	41
FALSE	High	Master Protein	P05141	ADP/ATP translocase 2 OS=Homo sapiens GN=SLC25A5 PE=1 SV=7	0	89.4933	41.6107	18	73	5	1	298	32.831	9.69	33	40
FALSE	High	Master Protein	Q7L014	Probable ATP-dependent RNA helicase DDX46 OS=Homo sapiens GN=DDX46 PE=1 SV=2	0	81.8498	19.8836	19	37	19	1	1031	117.29	9.29	33	4
FALSE	High	Master Protein	O43707	Alpha-actinin-4 OS=Homo sapiens GN=ACTN4 PE=1 SV=2	0	303.119	52.0307	45	108	30	1	911	104.788	5.44	32	76
FALSE	High	Master Protein	P84098	60S ribosomal protein L19 OS=Homo sapiens GN=RPL19 PE=1 SV=1	0	97.9921	39.2857	14	94	14	1	196	23.451	11.47	32	62
FALSE	High	Master Protein	P62241	40S ribosomal protein S8 OS=Homo sapiens GN=RPS8 PE=1 SV=2	0	138.402	63.9423	19	80	19	1	208	24.19	10.32	32	48
FALSE	High	Master Protein	Q9P015	39S ribosomal protein L15, mitochondrial OS=Homo sapiens GN=MRPL15 PE=1 SV=1	0	209.054	66.5541	22	76	22	1	296	33.399	10.01	32	44
FALSE	High	Master Protein	P78332	RNA-binding protein 6 OS=Homo sapiens GN=RBM6 PE=1 SV=5	0	119.775	24.488	32	74	31	1	1123	128.565	6.32	32	42
FALSE	High	Master Protein	P82650	28S ribosomal protein S22, mitochondrial OS=Homo sapiens GN=MRPS22 PE=1 SV=1	0	161.524	44.4444	20	72	20	1	360	41.254	7.9	32	40
FALSE	High	Master Protein	P48643	T-complex protein 1 subunit epsilon OS=Homo sapiens GN=CCT5 PE=1 SV=1	0	152.228	51.0166	26	61	25	1	541	59.633	5.66	32	29
FALSE	High	Master Protein	P42285	Superkiller viralicidic activity 2-like 2 OS=Homo sapiens GN=SKIV2L2 PE=1 SV=3	0	127.719	27.9271	26	57	26	1	1042	117.729	6.52	32	25
FALSE	High	Master Protein	Q14671	Pumilio homolog 1 OS=Homo sapiens GN=PUM1 PE=1 SV=3	0	73.0205	13.575	15	54	12	1	1186	126.395	6.84	32	22
FALSE	High	Master Protein	P06756	Integrin alpha-V OS=Homo sapiens GN=ITGAV PE=1 SV=2	0	73.9605	19.8473	19	39	19	1	1048	115.964	5.68	32	7
FALSE	High	Master Protein	P51116	Fragile X mental retardation syndrome-related protein 2 OS=Homo sapiens GN=FXR2 PE=1 SV=2	0	121.802	37.89	20	94	16	1	673	74.178	6.23	31	63
FALSE	High	Master Protein	P26373	60S ribosomal protein L13 OS=Homo sapiens GN=RPL13 PE=1 SV=4	0	119.081	45.9716	16	86	16	1	211	24.247	11.65	31	55
FALSE	High	Master Protein	Q9H0D6	5'-3' exoribonuclease 2 OS=Homo sapiens GN=XRN2 PE=1 SV=1	0	208.417	35.1579	34	83	34	1	950	108.513	7.47	31	52
FALSE	High	Master Protein	P14678	Small nuclear ribonucleoprotein-associated proteins B and B' OS=Homo sapiens GN=SNRPB PE=1 SV=2	0	71.5207	28.75	9	75	9	1	240	24.594	11.19	31	44
FALSE	High	Master Protein	P12236	ADP/ATP translocase 3 OS=Homo sapiens GN=SLC25A6 PE=1 SV=4	0	88.5053	42.953	17	70	2	1	298	32.845	9.74	31	39
FALSE	High	Master Protein	P26196	Probable ATP-dependent RNA helicase DDX6 OS=Homo sapiens GN=DDX6 PE=1 SV=2	0	167.504	43.2712	18	65	18	1	483	54.382	8.66	31	34
FALSE	High	Master Protein	P52292	Importin subunit alpha-1 OS=Homo sapiens GN=KPNA2 PE=1 SV=1	0	123.625	28.9225	15	64	15	1	529	57.826	5.4	31	33
FALSE	High	Master Protein	Q99873	Protein arginine N-methyltransferase 1 OS=Homo sapiens GN=PRMT1 PE=1 SV=2	0	139.298	44.3213	17	63	17	1	361	41.489	5.43	31	32
FALSE	High	Master Protein	P20073	Annexin A7 OS=Homo sapiens GN=ANXA7 PE=1 SV=3	0	108.34	35.2459	18	60	17	1	488	52.706	5.68	31	29
FALSE	High	Master Protein	P06576	ATP synthase subunit beta, mitochondrial OS=Homo sapiens GN=ATP5B PE=1 SV=3	0	163.976	44.4234	16	58	16	1	529	56.525	5.4	31	27
FALSE	High	Master Protein	Q6P087	RNA pseudouridylate synthase domain-containing protein 3 OS=Homo sapiens GN=RPUSD3 PE=1 SV=3	0	139.001	52.7066	21	71	21	1	351	38.437	10.32	30	41
FALSE	High	Master Protein	P41091	Eukaryotic translation initiation factor 2 subunit 3 OS=Homo sapiens GN=EIF2S3 PE=1 SV=3	0	106.639	48.5169	20	63	20	1	472	51.077	8.4	30	33
FALSE	High	Master Protein	Q9Y2Z4	Tyrosine--tRNA ligase, mitochondrial OS=Homo sapiens GN=YARS2 PE=1 SV=2	0	155.421	50.1048	18	61	18	1	477	53.166	8.98	30	31
FALSE	High	Master Protein	Q9UHX1	Poly(U)-binding-splicing factor PUF60 OS=Homo sapiens GN=PUF60 PE=1 SV=1	0	152.714	44.0072	21	59	21	1	559	59.838	5.29	30	29
FALSE	High	Master Protein	P26641	Elongation factor 1-gamma OS=Homo sapiens GN=EEF1G PE=1 SV=3	0	93.0699	27.9176	15	58	15	1	437	50.087	6.67	30	28
FALSE	High	Master Protein	O60684	Importin subunit alpha-7 OS=Homo sapiens GN=KPNA6 PE=1 SV=1	0	109.576	30.7836	16	54	11	1	536	59.991	4.98	30	24
FALSE	High	Master Protein	P26038	Moesin OS=Homo sapiens GN=MSN PE=1 SV=3	0	95.3036	40.208	23	52	15	1	577	67.778	6.4	30	22
FALSE	High	Master Protein	P57678	Gem-associated protein 4 OS=Homo sapiens GN=GEMIN4 PE=1 SV=2	0	110.907	23.1569	26	47	26	1	1058	119.96	6.04	30	17
FALSE	High	Master Protein	Q8WX93	Palladin OS=Homo sapiens GN=PALLD PE=1 SV=3	0	74.4732	15.1844	19	41	18	1	1383	150.47	7.09	30	11
FALSE	High	Master Protein	O75179	Ankyrin repeat domain-containing protein 17 OS=Homo sapiens GN=ANKRD17 PE=1 SV=3	0	114.354	12.1014	27	33	16	1	2603	274.088	6.52	30	3
FALSE	High	Master Protein	Q13247	Serine/arginine-rich splicing factor 6 OS=Homo sapiens GN=SRSF6 PE=1 SV=2	0	46.4785	28.4884	11	79	9	1	344	39.563	11.43	29	50
FALSE	High	Master Protein	Q92552	28S ribosomal protein S27, mitochondrial OS=Homo sapiens GN=MRPS27 PE=1 SV=3	0	165.621	57.4879	25	71	25	1	414	47.581	6.18	29	42
FALSE	High	Master Protein	Q9Y5A9	YTH domain-containing family protein 2 OS=Homo sapiens GN=YTHDF2 PE=1 SV=2	0	121.667	25.734	16	65	12	1	579	62.296	8.79	29	36
FALSE	High	Master Protein	P50990	T-complex protein 1 subunit theta OS=Homo sapiens GN=CCT8 PE=1 SV=4	0	86.9126	39.781	19	52	19	1	548	59.583	5.6	29	23
FALSE	High	Master Protein	P49368	T-complex protein 1 subunit gamma OS=Homo sapiens GN=CCT3 PE=1 SV=4	0	119.705	48.8073	23	48	23	1	545	60.495	6.49	29	19
FALSE	High	Master Protein	P27708	CAD protein OS=Homo sapiens GN=CAD PE=1 SV=3	0	125.43	17.618	33	45	32	1	2225	242.829	6.46	29	16
FALSE	High	Master Protein	Q9UQ35	Serine/arginine repetitive matrix protein 2 OS=Homo sapiens GN=SRRM2 PE=1 SV=2	0	66.6743	6.21366	13	38	13	1	2752	299.438	12.06	29	9
FALSE	High	Master Protein	P67936	Tropomyosin alpha-4 chain OS=Homo sapiens GN=TPM4 PE=1 SV=3	0	283.118	82.6613	35	128	20	1	248	28.504	4.69	28	100
FALSE	High	Master Protein	Q06787	Fragile X mental retardation protein 1 OS=Homo sapiens GN=FMR1 PE=1 SV=1	0	80.4409	25.6329	16	69	14	1	632	71.131	7.42	28	41
FALSE	High	Master Protein	P11387	DNA topoisomerase 1 OS=Homo sapiens GN=TOP1 PE=1 SV=2	0	141.671	32.6797	31	68	31	1	765	90.669	9.31	28	40
FALSE	High	Master Protein	Q99623	Prohibitin-2 OS=Homo sapiens GN=PHB2 PE=1 SV=2	0	106.609	57.8595	19	60	19	1	299	33.276	9.83	28	32
FALSE	High	Master Protein	Q14134	Tripartite motif-containing protein 29 OS=Homo sapiens GN=TRIM29 PE=1 SV=2	0	92.8833	29.7619	20	49	20	1	588	65.793	7.15	28	21
FALSE	High	Master Protein	O94855	Protein transport protein Sec24D OS=Homo sapiens GN=SEC24D PE=1 SV=2	0	78.561	18.8953	19	48	18	1	1032	112.936	7.25	28	20
FALSE	High	Master Protein	P04075	Fructose-bisphosphate aldolase A OS=Homo sapiens GN=ALDOA PE=1 SV=2	0	116.91	49.7253	17	43	16	1	364	39.395	8.09	28	15
FALSE	High	Master Protein	Q15365	Poly(rC)-binding protein 1 OS=Homo sapiens GN=PCBP1 PE=1 SV=2	0	99.9052	45.7865	13	74	7	1	356	37.474	7.09	27	47
FALSE	High	Master Protein	Q8IYB8	ATP-dependent RNA helicase SUPV3L1, mitochondrial OS=Homo sapiens GN=SUPV3L1 PE=1 SV=1	0	102.735	28.2443	22	57	22	1	786	87.935	7.99	27	30
FALSE	High	Master Protein	P60842	Eukaryotic initiation factor 4A-I OS=Homo sapiens GN=EIF4A1 PE=1 SV=1	0	93.9068	38.67	17	56	6	1	406	46.125	5.48	27	29
FALSE	High	Master Protein	Q15029	116 kDa U5 small nuclear ribonucleoprotein component OS=Homo sapiens GN=EFTUD2 PE=1 SV=1	0	133.424	29.6296	28	54	27	1	972	109.366	5	27	27
FALSE	High	Master Protein	Q96GM5	SWI/SNF-related matrix-associated actin-dependent regulator of chromatin subfamily D member 1 OS=Homo sapiens GN=SMARCD1 PE=1 SV=2	0	150.611	54.7573	26	53	21	1	515	58.196	9.25	27	26
FALSE	High	Master Protein	P07195	L-lactate dehydrogenase B chain OS=Homo sapiens GN=LDHB PE=1 SV=2	0	71.513	39.521	14	51	13	1	334	36.615	6.05	27	24
FALSE	High	Master Protein	Q9H6S0	Probable ATP-dependent RNA helicase YTHDC2 OS=Homo sapiens GN=YTHDC2 PE=1 SV=2	0	95.6868	18.3916	27	50	27	1	1430	160.147	8.4	27	23
FALSE	High	Master Protein	P12956	X-ray repair cross-complementing protein 6 OS=Homo sapiens GN=XRCC6 PE=1 SV=2	0	150.686	40.5583	22	48	22	1	609	69.799	6.64	27	21
FALSE	High	Master Protein	P06733	Alpha-enolase OS=Homo sapiens GN=ENO1 PE=1 SV=2	0	107.504	44.47	15	48	15	1	434	47.139	7.39	27	21
FALSE	High	Master Protein	O95486	Protein transport protein Sec24A OS=Homo sapiens GN=SEC24A PE=1 SV=2	0	94.4539	16.9259	17	47	13	1	1093	119.674	7.66	27	20
FALSE	High	Master Protein	Q9P2B2	Prostaglandin F2 receptor negative regulator OS=Homo sapiens GN=PTGFRN PE=1 SV=2	0	79.1279	20.8191	17	32	17	1	879	98.495	6.61	27	5
FALSE	High	Master Protein	Q14152	Eukaryotic translation initiation factor 3 subunit A OS=Homo sapiens GN=EIF3A PE=1 SV=1	0	64.5471	12.301	16	31	16	1	1382	166.468	6.79	27	4
FALSE	High	Master Protein	Q93008	Probable ubiquitin carboxyl-terminal hydrolase FAF-X OS=Homo sapiens GN=USP9X PE=1 SV=3	0	95.5338	9.41634	24	29	24	1	2570	292.094	5.8	27	2
FALSE	High	Master Protein	O43395	U4/U6 small nuclear ribonucleoprotein Prp3 OS=Homo sapiens GN=PRPF3 PE=1 SV=2	0	163.655	30.7467	19	87	19	1	683	77.481	9.5	26	61
FALSE	High	Master Protein	P63010	AP-2 complex subunit beta OS=Homo sapiens GN=AP2B1 PE=1 SV=1	0	180.334	31.5902	31	82	16	1	937	104.486	5.38	26	56
FALSE	High	Master Protein	Q9NUL3	Double-stranded RNA-binding protein Staufen homolog 2 OS=Homo sapiens GN=STAU2 PE=1 SV=1	0	126.418	41.9298	21	71	20	1	570	62.601	9.61	26	45
FALSE	High	Master Protein	P06748	Nucleophosmin OS=Homo sapiens GN=NPM1 PE=1 SV=2	0	155.853	39.7959	13	68	13	1	294	32.555	4.78	26	42
FALSE	High	Master Protein	Q07020	60S ribosomal protein L18 OS=Homo sapiens GN=RPL18 PE=1 SV=2	0	76.8669	45.7447	12	63	12	1	188	21.621	11.72	26	37
FALSE	High	Master Protein	P49406	39S ribosomal protein L19, mitochondrial OS=Homo sapiens GN=MRPL19 PE=1 SV=2	0	118.768	53.4247	23	61	23	1	292	33.514	9.5	26	35
FALSE	High	Master Protein	P18621	60S ribosomal protein L17 OS=Homo sapiens GN=RPL17 PE=1 SV=3	0	79.9369	43.4783	10	61	10	1	184	21.383	10.17	26	35
FALSE	High	Master Protein	Q9Y224	UPF0568 protein C14orf166 OS=Homo sapiens GN=C14orf166 PE=1 SV=1	0	101.554	61.0656	15	55	15	1	244	28.051	6.65	26	29
FALSE	High	Master Protein	Q9UJS0	Calcium-binding mitochondrial carrier protein Aralar2 OS=Homo sapiens GN=SLC25A13 PE=1 SV=2	0	156.237	44.1481	24	50	15	1	675	74.129	8.62	26	24
FALSE	High	Master Protein	P17987	T-complex protein 1 subunit alpha OS=Homo sapiens GN=TCP1 PE=1 SV=1	0	110.041	42.0863	21	47	21	1	556	60.306	6.11	26	21
FALSE	High	Master Protein	P07814	Bifunctional glutamate/proline--tRNA ligase OS=Homo sapiens GN=EPRS PE=1 SV=5	0	64.6114	11.8386	19	28	19	1	1512	170.483	7.33	26	2
FALSE	High	Master Protein	P06753	Tropomyosin alpha-3 chain OS=Homo sapiens GN=TPM3 PE=1 SV=2	0	220.899	55.0877	22	102	10	1	285	32.93	4.72	25	77
FALSE	High	Master Protein	Q07157	Tight junction protein ZO-1 OS=Homo sapiens GN=TJP1 PE=1 SV=3	0	222.417	28.6613	43	80	43	1	1748	195.34	6.7	25	55
FALSE	High	Master Protein	Q14498	RNA-binding protein 39 OS=Homo sapiens GN=RBM39 PE=1 SV=2	0	183.951	47.1698	19	73	17	1	530	59.343	10.1	25	48
FALSE	High	Master Protein	A0AV96	RNA-binding protein 47 OS=Homo sapiens GN=RBM47 PE=1 SV=2	0	166.206	43.339	22	64	22	1	593	64.058	7.68	25	39
FALSE	High	Master Protein	Q01813	ATP-dependent 6-phosphofructokinase, platelet type OS=Homo sapiens GN=PFKP PE=1 SV=2	0	184.186	34.1837	25	62	21	1	784	85.542	7.55	25	37
FALSE	High	Master Protein	Q9Y3F4	Serine-threonine kinase receptor-associated protein OS=Homo sapiens GN=STRAP PE=1 SV=1	0	156.182	62	18	59	18	1	350	38.414	5.12	25	34
FALSE	High	Master Protein	Q5BKZ1	DBIRD complex subunit ZNF326 OS=Homo sapiens GN=ZNF326 PE=1 SV=2	0	101.85	35.2234	16	58	16	1	582	65.613	5.15	25	33
FALSE	High	Master Protein	O14908	PDZ domain-containing protein GIPC1 OS=Homo sapiens GN=GIPC1 PE=1 SV=2	0	63.1282	34.8348	12	49	12	1	333	36.027	6.28	25	24
FALSE	High	Master Protein	P40227	T-complex protein 1 subunit zeta OS=Homo sapiens GN=CCT6A PE=1 SV=3	0	135.56	43.3145	20	47	20	1	531	57.988	6.68	25	22
FALSE	High	Master Protein	Q92616	Translational activator GCN1 OS=Homo sapiens GN=GCN1L1 PE=1 SV=6	0	94.9168	9.21003	21	24	21	1	2671	292.572	7.47	24
FALSE	High	Master Protein	P57721	Poly(rC)-binding protein 3 OS=Homo sapiens GN=PCBP3 PE=2 SV=2	0	74.6491	19.407	7	57	1	1	371	39.44	8.07	24	33
FALSE	High	Master Protein	Q13242	Serine/arginine-rich splicing factor 9 OS=Homo sapiens GN=SRSF9 PE=1 SV=1	0	93.693	65.6109	19	53	18	1	221	25.526	8.65	24	29
FALSE	High	Master Protein	P52294	Importin subunit alpha-5 OS=Homo sapiens GN=KPNA1 PE=1 SV=3	0	102.6	28.6245	13	48	8	1	538	60.184	5.01	24	24
FALSE	High	Master Protein	P09874	Poly [ADP-ribose] polymerase 1 OS=Homo sapiens GN=PARP1 PE=1 SV=4	0	101.395	29.1913	25	45	25	1	1014	113.012	8.88	24	21
FALSE	High	Master Protein	Q14694	Ubiquitin carboxyl-terminal hydrolase 10 OS=Homo sapiens GN=USP10 PE=1 SV=2	0	95.4944	27.193	19	45	19	1	798	87.08	5.31	24	21
FALSE	High	Master Protein	Q17RY0	Cytoplasmic polyadenylation element-binding protein 4 OS=Homo sapiens GN=CPEB4 PE=1 SV=1	0	92.8278	25.5144	16	44	10	1	729	80.102	7.18	24	20
FALSE	High	Master Protein	Q9Y262	Eukaryotic translation initiation factor 3 subunit L OS=Homo sapiens GN=EIF3L PE=1 SV=1	0	117.807	44.8582	22	42	22	1	564	66.684	6.34	24	18
FALSE	High	Master Protein	P31327	Carbamoyl-phosphate synthase [ammonia], mitochondrial OS=Homo sapiens GN=CPS1 PE=1 SV=2	0	93.0064	14.8	19	33	18	1	1500	164.835	6.74	24	9
FALSE	High	Master Protein	P08648	Integrin alpha-5 OS=Homo sapiens GN=ITGA5 PE=1 SV=2	0	65.3639	16.4919	14	31	14	1	1049	114.465	5.77	24	7
FALSE	High	Master Protein	Q9NYL9	Tropomodulin-3 OS=Homo sapiens GN=TMOD3 PE=1 SV=1	0	186.113	61.3636	20	98	19	1	352	39.57	5.19	23	75
FALSE	High	Master Protein	P07237	Protein disulfide-isomerase OS=Homo sapiens GN=P4HB PE=1 SV=3	0	146.409	46.6535	26	65	26	1	508	57.081	4.87	23	42
FALSE	High	Master Protein	Q2NL82	Pre-rRNA-processing protein TSR1 homolog OS=Homo sapiens GN=TSR1 PE=1 SV=1	0	190.285	30.2239	25	62	25	1	804	91.752	7.42	23	39
FALSE	High	Master Protein	P29558	RNA-binding motif, single-stranded-interacting protein 1 OS=Homo sapiens GN=RBMS1 PE=1 SV=3	0	67.5635	27.8325	9	61	8	1	406	44.477	8.79	23	38
FALSE	High	Master Protein	Q99575	Ribonucleases P/MRP protein subunit POP1 OS=Homo sapiens GN=POP1 PE=1 SV=2	0	135.618	27.1484	24	55	24	1	1024	114.636	9.22	23	32
FALSE	High	Master Protein	Q86Y46	Keratin, type II cytoskeletal 73 OS=Homo sapiens GN=KRT73 PE=1 SV=1	0	15.4244	5.37037	4	54	1	1	540	58.887	7.23	23	31
FALSE	High	Master Protein	P00338	L-lactate dehydrogenase A chain OS=Homo sapiens GN=LDHA PE=1 SV=2	0	76.1688	39.1566	17	51	16	1	332	36.665	8.27	23	28
FALSE	High	Master Protein	Q9BQG0	Myb-binding protein 1A OS=Homo sapiens GN=MYBBP1A PE=1 SV=2	0	134.463	20.256	25	48	25	1	1328	148.762	9.28	23	25
FALSE	High	Master Protein	P55735	Protein SEC13 homolog OS=Homo sapiens GN=SEC13 PE=1 SV=3	0	96.8534	44.7205	10	47	10	1	322	35.518	5.48	23	24
FALSE	High	Master Protein	Q00325	Phosphate carrier protein, mitochondrial OS=Homo sapiens GN=SLC25A3 PE=1 SV=2	0	76.7092	35.6354	15	47	15	1	362	40.069	9.38	23	24
FALSE	High	Master Protein	Q9Y2R9	28S ribosomal protein S7, mitochondrial OS=Homo sapiens GN=MRPS7 PE=1 SV=2	0	121.159	59.5041	16	45	16	1	242	28.116	9.99	23	22
FALSE	High	Master Protein	Q99700	Ataxin-2 OS=Homo sapiens GN=ATXN2 PE=1 SV=2	0	74.5555	13.6329	14	45	14	1	1313	140.196	9.57	23	22
FALSE	High	Master Protein	Q06830	Peroxiredoxin-1 OS=Homo sapiens GN=PRDX1 PE=1 SV=1	0	69.8729	52.2613	14	43	10	1	199	22.096	8.13	23	20
FALSE	High	Master Protein	P53396	ATP-citrate synthase OS=Homo sapiens GN=ACLY PE=1 SV=3	0	80.6265	18.5286	20	41	20	1	1101	120.762	7.33	23	18
FALSE	High	Master Protein	P00558	Phosphoglycerate kinase 1 OS=Homo sapiens GN=PGK1 PE=1 SV=3	0	108.217	46.283	16	40	16	1	417	44.586	8.1	23	17
FALSE	High	Master Protein	O15042	U2 snRNP-associated SURP motif-containing protein OS=Homo sapiens GN=U2SURP PE=1 SV=2	0	76.3566	19.9223	18	40	18	1	1029	118.219	8.47	23	17
FALSE	High	Master Protein	Q969G3	SWI/SNF-related matrix-associated actin-dependent regulator of chromatin subfamily E member 1 OS=Homo sapiens GN=SMARCE1 PE=1 SV=2	0	87.3403	26.2774	11	39	10	1	411	46.621	4.88	23	16
FALSE	High	Master Protein	Q8WUM4	Programmed cell death 6-interacting protein OS=Homo sapiens GN=PDCD6IP PE=1 SV=1	0	78.5575	23.3871	20	35	20	1	868	95.963	6.52	23	12
FALSE	High	Master Protein	P54136	Arginine--tRNA ligase, cytoplasmic OS=Homo sapiens GN=RARS PE=1 SV=2	0	77.8525	27.8788	17	31	17	1	660	75.331	6.68	23	8
FALSE	High	Master Protein	Q8TEQ6	Gem-associated protein 5 OS=Homo sapiens GN=GEMIN5 PE=1 SV=3	0	73.9665	15.9151	21	24	21	1	1508	168.483	6.62	23	1
FALSE	High	Master Protein	P46940	Ras GTPase-activating-like protein IQGAP1 OS=Homo sapiens GN=IQGAP1 PE=1 SV=1	0	262.143	32.5287	49	87	49	1	1657	189.134	6.48	22	65
FALSE	High	Master Protein	P12814	Alpha-actinin-1 OS=Homo sapiens GN=ACTN1 PE=1 SV=2	0	185.032	39.2377	31	74	16	1	892	102.993	5.41	22	52
FALSE	High	Master Protein	P13674	Prolyl 4-hydroxylase subunit alpha-1 OS=Homo sapiens GN=P4HA1 PE=1 SV=2	0	192.245	51.6854	25	70	25	1	534	61.011	6.01	22	48
FALSE	High	Master Protein	Q15020	Squamous cell carcinoma antigen recognized by T-cells 3 OS=Homo sapiens GN=SART3 PE=1 SV=1	0	126.521	29.0758	26	62	26	1	963	109.865	5.57	22	40
FALSE	High	Master Protein	O00541	Pescadillo homolog OS=Homo sapiens GN=PES1 PE=1 SV=1	0	101.383	33.5034	20	62	20	1	588	67.96	7.33	22	40
FALSE	High	Master Protein	P62979	Ubiquitin-40S ribosomal protein S27a OS=Homo sapiens GN=RPS27A PE=1 SV=2	0	46.2093	23.0769	5	60	5	1	156	17.953	9.64	22	38
FALSE	High	Master Protein	Q96HS1	Serine/threonine-protein phosphatase PGAM5, mitochondrial OS=Homo sapiens GN=PGAM5 PE=1 SV=2	0	105.917	57.7855	17	59	17	1	289	31.985	8.68	22	37
FALSE	High	Master Protein	P83731	60S ribosomal protein L24 OS=Homo sapiens GN=RPL24 PE=1 SV=1	0	103.176	36.3057	10	53	10	1	157	17.768	11.25	22	31
FALSE	High	Master Protein	P55072	Transitional endoplasmic reticulum ATPase OS=Homo sapiens GN=VCP PE=1 SV=4	0	134.183	35.9801	25	48	25	1	806	89.266	5.26	22	26
FALSE	High	Master Protein	Q6NZY4	Zinc finger CCHC domain-containing protein 8 OS=Homo sapiens GN=ZCCHC8 PE=1 SV=2	0	84.6928	28.43	14	44	14	1	707	78.529	4.87	22	22
FALSE	High	Master Protein	Q9UDY2	Tight junction protein ZO-2 OS=Homo sapiens GN=TJP2 PE=1 SV=2	0	71.2373	13.8655	16	43	16	1	1190	133.876	7.4	22	21
FALSE	High	Master Protein	P42694	Probable helicase with zinc finger domain OS=Homo sapiens GN=HELZ PE=1 SV=2	0	118.191	18.1256	28	41	28	1	1942	218.833	7.42	22	19
FALSE	High	Master Protein	P55884	Eukaryotic translation initiation factor 3 subunit B OS=Homo sapiens GN=EIF3B PE=1 SV=3	0	90.6371	25.7985	19	38	19	1	814	92.424	5	22	16
FALSE	High	Master Protein	Q14697	Neutral alpha-glucosidase AB OS=Homo sapiens GN=GANAB PE=1 SV=3	0	69.6882	15.8898	15	38	15	1	944	106.807	6.14	22	16
FALSE	High	Master Protein	P07951	Tropomyosin beta chain OS=Homo sapiens GN=TPM2 PE=1 SV=1	0	181.418	63.7324	25	96	8	1	284	32.831	4.7	21	75
FALSE	High	Master Protein	P46777	60S ribosomal protein L5 OS=Homo sapiens GN=RPL5 PE=1 SV=3	0	166.033	50.8418	20	89	20	1	297	34.341	9.72	21	68
FALSE	High	Master Protein	P09493	Tropomyosin alpha-1 chain OS=Homo sapiens GN=TPM1 PE=1 SV=2	0	176.726	48.5915	21	86	7	1	284	32.689	4.74	21	65
FALSE	High	Master Protein	Q9BY44	Eukaryotic translation initiation factor 2A OS=Homo sapiens GN=EIF2A PE=1 SV=3	0	148.431	52.3077	26	73	26	1	585	64.949	8.87	21	52
FALSE	High	Master Protein	P84103	Serine/arginine-rich splicing factor 3 OS=Homo sapiens GN=SRSF3 PE=1 SV=1	0	63.0636	45.7317	9	53	8	1	164	19.318	11.65	21	32
FALSE	High	Master Protein	P82675	28S ribosomal protein S5, mitochondrial OS=Homo sapiens GN=MRPS5 PE=1 SV=2	0	107.509	34.6512	17	52	17	1	430	47.976	9.92	21	31
FALSE	High	Master Protein	Q12926	ELAV-like protein 2 OS=Homo sapiens GN=ELAVL2 PE=1 SV=2	0	65.6707	47.6323	15	44	9	1	359	39.479	9.13	21	23
FALSE	High	Master Protein	P23526	Adenosylhomocysteinase OS=Homo sapiens GN=AHCY PE=1 SV=4	0	92.6644	39.1204	17	39	15	1	432	47.685	6.34	21	18
FALSE	High	Master Protein	Q9NWU5	39S ribosomal protein L22, mitochondrial OS=Homo sapiens GN=MRPL22 PE=1 SV=1	0	43.668	43.2039	8	39	8	1	206	23.626	9.94	21	18
FALSE	High	Master Protein	Q8N163	Cell cycle and apoptosis regulator protein 2 OS=Homo sapiens GN=CCAR2 PE=1 SV=2	0	67.9747	18.7432	16	35	16	1	923	102.838	5.22	21	14
FALSE	High	Master Protein	B5ME19	Eukaryotic translation initiation factor 3 subunit C-like protein OS=Homo sapiens GN=EIF3CL PE=3 SV=1	0	65.0824	13.3479	14	35	14	1	914	105.407	5.64	21	14
FALSE	High	Master Protein	Q659C4	La-related protein 1B OS=Homo sapiens GN=LARP1B PE=1 SV=2	0	34.3695	5.36105	5	31	1	1	914	105.257	7.61	21	10
FALSE	High	Master Protein	Q9NX05	Constitutive coactivator of PPAR-gamma-like protein 2 OS=Homo sapiens GN=FAM120C PE=2 SV=3	0	65.1905	14.8723	12	30	11	1	1096	120.511	9.03	21	9
FALSE	High	Master Protein	Q9Y520	Protein PRRC2C OS=Homo sapiens GN=PRRC2C PE=1 SV=4	0	66.9798	7.49309	20	25	20	1	2896	316.718	9.13	21	4
FALSE	High	Master Protein	P16401	Histone H1.5 OS=Homo sapiens GN=HIST1H1B PE=1 SV=3	0	99.5118	31.4159	15	76	10	1	226	22.566	10.92	20	56
FALSE	High	Master Protein	O15226	NF-kappa-B-repressing factor OS=Homo sapiens GN=NKRF PE=1 SV=2	0	121.349	34.3478	25	62	25	1	690	77.624	8.79	20	42
FALSE	High	Master Protein	Q15637	Splicing factor 1 OS=Homo sapiens GN=SF1 PE=1 SV=4	0	119.049	23.3177	13	58	13	1	639	68.286	8.98	20	38
FALSE	High	Master Protein	Q9BZE4	Nucleolar GTP-binding protein 1 OS=Homo sapiens GN=GTPBP4 PE=1 SV=3	0	122.037	34.3849	22	54	22	1	634	73.918	9.5	20	34
FALSE	High	Master Protein	Q9Y399	28S ribosomal protein S2, mitochondrial OS=Homo sapiens GN=MRPS2 PE=1 SV=1	0	87.1328	36.8243	16	50	16	1	296	33.228	9.26	20	30
FALSE	High	Master Protein	Q9BYD3	39S ribosomal protein L4, mitochondrial OS=Homo sapiens GN=MRPL4 PE=1 SV=1	0	92.4319	33.119	8	49	8	1	311	34.897	9.72	20	29
FALSE	High	Master Protein	Q9BRJ2	39S ribosomal protein L45, mitochondrial OS=Homo sapiens GN=MRPL45 PE=1 SV=2	0	117.62	57.5163	16	46	16	1	306	35.328	9.03	20	26
FALSE	High	Master Protein	P12235	ADP/ATP translocase 1 OS=Homo sapiens GN=SLC25A4 PE=1 SV=4	0	50.8366	31.2081	11	46	2	1	298	33.043	9.76	20	26
FALSE	High	Master Protein	P05023	Sodium/potassium-transporting ATPase subunit alpha-1 OS=Homo sapiens GN=ATP1A1 PE=1 SV=1	0	78.1781	19.7458	19	38	19	1	1023	112.824	5.49	20	18
FALSE	High	Master Protein	Q00577	Transcriptional activator protein Pur-alpha OS=Homo sapiens GN=PURA PE=1 SV=2	0	95.1777	37.5776	13	37	11	1	322	34.889	6.44	20	17
FALSE	High	Master Protein	Q96I51	Williams-Beuren syndrome chromosomal region 16 protein OS=Homo sapiens GN=WBSCR16 PE=1 SV=2	0	86.4988	33.1897	15	37	15	1	464	49.965	8.4	20	17
FALSE	High	Master Protein	P19013	Keratin, type II cytoskeletal 4 OS=Homo sapiens GN=KRT4 PE=1 SV=4	0	23.8596	9.3633	6	37	2	1	534	57.25	6.61	20	17
FALSE	High	Master Protein	P31040	Succinate dehydrogenase [ubiquinone] flavoprotein subunit, mitochondrial OS=Homo sapiens GN=SDHA PE=1 SV=2	0	93.9111	28.7651	16	36	16	1	664	72.645	7.39	20	16
FALSE	High	Master Protein	P23284	Peptidyl-prolyl cis-trans isomerase B OS=Homo sapiens GN=PPIB PE=1 SV=2	0	74.157	46.7593	12	35	12	1	216	23.728	9.41	20	15
FALSE	High	Master Protein	Q8TB72	Pumilio homolog 2 OS=Homo sapiens GN=PUM2 PE=1 SV=2	0	48.393	14.5403	13	34	10	1	1066	114.145	7.08	20	14
FALSE	High	Master Protein	O43172	U4/U6 small nuclear ribonucleoprotein Prp4 OS=Homo sapiens GN=PRPF4 PE=1 SV=2	0	124.006	45.2107	23	59	23	1	522	58.412	7.42	19	40
FALSE	High	Master Protein	P62906	60S ribosomal protein L10a OS=Homo sapiens GN=RPL10A PE=1 SV=2	0	124.317	45.6221	12	54	12	1	217	24.816	9.94	19	35
FALSE	High	Master Protein	Q9Y383	Putative RNA-binding protein Luc7-like 2 OS=Homo sapiens GN=LUC7L2 PE=1 SV=2	0	73.1753	31.3776	12	52	8	1	392	46.486	10.01	19	33
FALSE	High	Master Protein	P09001	39S ribosomal protein L3, mitochondrial OS=Homo sapiens GN=MRPL3 PE=1 SV=1	0	67.3007	35.9195	14	52	14	1	348	38.608	9.48	19	33
FALSE	High	Master Protein	P05198	Eukaryotic translation initiation factor 2 subunit 1 OS=Homo sapiens GN=EIF2S1 PE=1 SV=3	0	90.0828	47.9365	16	51	16	1	315	36.089	5.08	19	32
FALSE	High	Master Protein	Q02543	60S ribosomal protein L18a OS=Homo sapiens GN=RPL18A PE=1 SV=2	0	74.8836	63.0682	14	51	14	1	176	20.749	10.71	19	32
FALSE	High	Master Protein	P08579	U2 small nuclear ribonucleoprotein B'' OS=Homo sapiens GN=SNRPB2 PE=1 SV=1	0	33.8357	31.5556	8	47	5	1	225	25.47	9.72	19	28
FALSE	High	Master Protein	P0C0S8	Histone H2A type 1 OS=Homo sapiens GN=HIST1H2AG PE=1 SV=2	0	30.8856	35.3846	5	47	5	1	130	14.083	10.9	19	28
FALSE	High	Master Protein	O00411	DNA-directed RNA polymerase, mitochondrial OS=Homo sapiens GN=POLRMT PE=1 SV=2	0	103.203	20.4065	20	44	20	1	1230	138.532	8.98	19	25
FALSE	High	Master Protein	P50991	T-complex protein 1 subunit delta OS=Homo sapiens GN=CCT4 PE=1 SV=4	0	106.277	41.0019	20	40	19	1	539	57.888	7.83	19	21
FALSE	High	Master Protein	Q5TC82	Roquin-1 OS=Homo sapiens GN=RC3H1 PE=1 SV=1	0	94.4101	21.0062	16	39	12	1	1133	125.658	7.27	19	20
FALSE	High	Master Protein	Q12797	Aspartyl/asparaginyl beta-hydroxylase OS=Homo sapiens GN=ASPH PE=1 SV=3	0	89.7527	19.2612	16	39	15	1	758	85.809	5.01	19	20
FALSE	High	Master Protein	O95677	Eyes absent homolog 4 OS=Homo sapiens GN=EYA4 PE=1 SV=2	0	107.218	26.4476	14	37	14	1	639	69.461	5.2	19	18
FALSE	High	Master Protein	O95758	Polypyrimidine tract-binding protein 3 OS=Homo sapiens GN=PTBP3 PE=1 SV=2	0	64.3558	19.3841	10	35	7	1	552	59.652	9.04	19	16
FALSE	High	Master Protein	Q15459	Splicing factor 3A subunit 1 OS=Homo sapiens GN=SF3A1 PE=1 SV=1	0	88.2119	19.4199	16	34	16	1	793	88.831	5.22	19	15
FALSE	High	Master Protein	Q53GT1	Kelch-like protein 22 OS=Homo sapiens GN=KLHL22 PE=1 SV=2	0	90.4969	34.7003	19	33	19	1	634	71.621	5.49	19	14
FALSE	High	Master Protein	Q5JTH9	RRP12-like protein OS=Homo sapiens GN=RRP12 PE=1 SV=2	0	81.1683	16.7309	21	33	20	1	1297	143.611	8.75	19	14
FALSE	High	Master Protein	P16615	Sarcoplasmic/endoplasmic reticulum calcium ATPase 2 OS=Homo sapiens GN=ATP2A2 PE=1 SV=1	0	67.8624	17.8503	17	31	17	1	1042	114.683	5.34	19	12
FALSE	High	Master Protein	P29401	Transketolase OS=Homo sapiens GN=TKT PE=1 SV=3	0	93.3378	29.5345	15	29	15	1	623	67.835	7.66	19	10
FALSE	High	Master Protein	Q9NYF8	Bcl-2-associated transcription factor 1 OS=Homo sapiens GN=BCLAF1 PE=1 SV=2	0	51.6383	11.7391	11	29	11	1	920	106.059	9.98	19	10
FALSE	High	Master Protein	P53621	Coatomer subunit alpha OS=Homo sapiens GN=COPA PE=1 SV=2	0	71.4726	17.8105	20	27	20	1	1224	138.258	7.66	19	8
FALSE	High	Master Protein	P35573	Glycogen debranching enzyme OS=Homo sapiens GN=AGL PE=1 SV=3	0	56.2348	10.4439	17	20	17	1	1532	174.652	6.76	19	1
FALSE	High	Master Protein	Q9UM54	Unconventional myosin-VI OS=Homo sapiens GN=MYO6 PE=1 SV=4	0	318.502	35.2396	50	97	50	1	1294	149.596	8.53	18	79
FALSE	High	Master Protein	P05388	60S acidic ribosomal protein P0 OS=Homo sapiens GN=RPLP0 PE=1 SV=1	0	176.289	58.3596	21	78	21	1	317	34.252	5.97	18	60
FALSE	High	Master Protein	Q9NPE2	Neugrin OS=Homo sapiens GN=NGRN PE=1 SV=2	0	132.011	61.512	19	66	19	1	291	32.388	9.1	18	48
FALSE	High	Master Protein	P62258	14-3-3 protein epsilon OS=Homo sapiens GN=YWHAE PE=1 SV=1	0	112.795	61.9608	18	61	16	1	255	29.155	4.74	18	43
FALSE	High	Master Protein	Q9H0A0	N-acetyltransferase 10 OS=Homo sapiens GN=NAT10 PE=1 SV=2	0	138.743	25.4634	26	53	25	1	1025	115.657	8.27	18	35
FALSE	High	Master Protein	Q9UH17	DNA dC->dU-editing enzyme APOBEC-3B OS=Homo sapiens GN=APOBEC3B PE=1 SV=1	0	95.6427	39.0052	14	47	14	1	382	45.894	6.06	18	29
FALSE	High	Master Protein	Q96PU8	Protein quaking OS=Homo sapiens GN=QKI PE=1 SV=1	0	110.665	35.7771	13	44	13	1	341	37.647	8.56	18	26
FALSE	High	Master Protein	P13797	Plastin-3 OS=Homo sapiens GN=PLS3 PE=1 SV=4	0	139.37	42.6984	23	43	19	1	630	70.766	5.6	18	25
FALSE	High	Master Protein	Q5VYS8	Terminal uridylyltransferase 7 OS=Homo sapiens GN=ZCCHC6 PE=1 SV=1	0	95.128	18.7291	26	42	24	1	1495	171.122	6.83	18	24
FALSE	High	Master Protein	Q9H9J2	39S ribosomal protein L44, mitochondrial OS=Homo sapiens GN=MRPL44 PE=1 SV=1	0	112.131	39.4578	14	41	14	1	332	37.512	8.4	18	23
FALSE	High	Master Protein	Q9BXP5	Serrate RNA effector molecule homolog OS=Homo sapiens GN=SRRT PE=1 SV=1	0	64.6793	18.1507	17	39	17	1	876	100.604	5.96	18	21
FALSE	High	Master Protein	Q14974	Importin subunit beta-1 OS=Homo sapiens GN=KPNB1 PE=1 SV=2	0	60.0769	15.8676	12	39	12	1	876	97.108	4.78	18	21
FALSE	High	Master Protein	P78371	T-complex protein 1 subunit beta OS=Homo sapiens GN=CCT2 PE=1 SV=4	0	93.9081	39.6262	17	37	17	1	535	57.452	6.46	18	19
FALSE	High	Master Protein	Q96GM8	Target of EGR1 protein 1 OS=Homo sapiens GN=TOE1 PE=1 SV=1	0	65.8773	24.5098	13	36	13	1	510	56.512	7.18	18	18
FALSE	High	Master Protein	P15311	Ezrin OS=Homo sapiens GN=EZR PE=1 SV=4	0	35.6893	14.6758	11	36	3	1	586	69.37	6.27	18	18
FALSE	High	Master Protein	Q9Y3D9	28S ribosomal protein S23, mitochondrial OS=Homo sapiens GN=MRPS23 PE=1 SV=2	0	81.7814	43.1579	12	35	12	1	190	21.757	8.9	18	17
FALSE	High	Master Protein	P30153	Serine/threonine-protein phosphatase 2A 65 kDa regulatory subunit A alpha isoform OS=Homo sapiens GN=PPP2R1A PE=1 SV=4	0	106.163	30.7301	17	34	13	1	589	65.267	5.11	18	16
FALSE	High	Master Protein	Q9H074	Polyadenylate-binding protein-interacting protein 1 OS=Homo sapiens GN=PAIP1 PE=1 SV=1	0	53.2471	16.9102	8	33	8	1	479	53.491	4.81	18	15
FALSE	High	Master Protein	Q12931	Heat shock protein 75 kDa, mitochondrial OS=Homo sapiens GN=TRAP1 PE=1 SV=3	0	66.3154	20.8807	13	29	12	1	704	80.06	8.21	18	11
FALSE	High	Master Protein	A5YKK6	CCR4-NOT transcription complex subunit 1 OS=Homo sapiens GN=CNOT1 PE=1 SV=2	0	66.2639	8.62795	20	29	20	1	2376	266.768	7.11	18	11
FALSE	High	Master Protein	Q9Y2W1	Thyroid hormone receptor-associated protein 3 OS=Homo sapiens GN=THRAP3 PE=1 SV=2	0	36.2309	8.90052	8	28	8	1	955	108.601	10.15	18	10
FALSE	High	Master Protein	Q14839	Chromodomain-helicase-DNA-binding protein 4 OS=Homo sapiens GN=CHD4 PE=1 SV=2	0	57.2683	8.94351	16	19	13	1	1912	217.867	5.86	18	1
FALSE	High	Master Protein	O95782	AP-2 complex subunit alpha-1 OS=Homo sapiens GN=AP2A1 PE=1 SV=3	0	260.948	44.217	40	79	29	1	977	107.478	7.03	17	62
FALSE	High	Master Protein	Q9BVP2	Guanine nucleotide-binding protein-like 3 OS=Homo sapiens GN=GNL3 PE=1 SV=2	0	114.432	39.1621	18	53	17	1	549	61.954	9.16	17	36
FALSE	High	Master Protein	Q9UQ80	Proliferation-associated protein 2G4 OS=Homo sapiens GN=PA2G4 PE=1 SV=3	0	109.056	45.6853	20	49	20	1	394	43.759	6.55	17	32
FALSE	High	Master Protein	P26368	Splicing factor U2AF 65 kDa subunit OS=Homo sapiens GN=U2AF2 PE=1 SV=4	0	141.508	48.2105	15	46	15	1	475	53.467	9.09	17	29
FALSE	High	Master Protein	P46782	40S ribosomal protein S5 OS=Homo sapiens GN=RPS5 PE=1 SV=4	0	70.9213	37.2549	11	43	11	1	204	22.862	9.72	17	26
FALSE	High	Master Protein	Q99459	Cell division cycle 5-like protein OS=Homo sapiens GN=CDC5L PE=1 SV=2	0	112.436	30.9227	20	41	20	1	802	92.194	8.18	17	24
FALSE	High	Master Protein	P47914	60S ribosomal protein L29 OS=Homo sapiens GN=RPL29 PE=1 SV=2	0	25.2749	20.1258	4	41	4	1	159	17.741	11.66	17	24
FALSE	High	Master Protein	Q9UKM9	RNA-binding protein Raly OS=Homo sapiens GN=RALY PE=1 SV=1	0	57.7624	30.3922	12	39	12	1	306	32.444	9.17	17	22
FALSE	High	Master Protein	Q86TB9	Protein PAT1 homolog 1 OS=Homo sapiens GN=PATL1 PE=1 SV=2	0	80.7215	22.7273	16	38	16	1	770	86.796	6.67	17	21
FALSE	High	Master Protein	Q13595	Transformer-2 protein homolog alpha OS=Homo sapiens GN=TRA2A PE=1 SV=1	0	48.6642	29.7872	12	37	10	1	282	32.669	11.27	17	20
FALSE	High	Master Protein	P14625	Endoplasmin OS=Homo sapiens GN=HSP90B1 PE=1 SV=1	0	75.5873	23.7858	17	34	15	1	803	92.411	4.84	17	17
FALSE	High	Master Protein	O75746	Calcium-binding mitochondrial carrier protein Aralar1 OS=Homo sapiens GN=SLC25A12 PE=1 SV=2	0	68.4965	25.5162	18	30	9	1	678	74.715	8.38	17	13
FALSE	High	Master Protein	P61313	60S ribosomal protein L15 OS=Homo sapiens GN=RPL15 PE=1 SV=2	0	25.4698	36.2745	8	30	8	1	204	24.131	11.62	17	13
FALSE	High	Master Protein	P60174	Triosephosphate isomerase OS=Homo sapiens GN=TPI1 PE=1 SV=3	0	59.1857	46.8531	12	29	12	1	286	30.772	5.92	17	12
FALSE	High	Master Protein	P26640	Valine--tRNA ligase OS=Homo sapiens GN=VARS PE=1 SV=4	0	50.9208	12.8956	16	28	16	1	1264	140.387	7.59	17	11
FALSE	High	Master Protein	O75694	Nuclear pore complex protein Nup155 OS=Homo sapiens GN=NUP155 PE=1 SV=1	0	76.2675	13.5155	17	27	17	1	1391	155.1	6.16	17	10
FALSE	High	Master Protein	P06744	Glucose-6-phosphate isomerase OS=Homo sapiens GN=GPI PE=1 SV=4	0	64.3321	20.2509	10	27	10	1	558	63.107	8.32	17	10
FALSE	High	Master Protein	Q86TC9	Myopalladin OS=Homo sapiens GN=MYPN PE=1 SV=2	0	29.6921	7.27273	9	21	8	1	1320	145.167	6.77	17	4
FALSE	High	Master Protein	Q93073	Selenocysteine insertion sequence-binding protein 2-like OS=Homo sapiens GN=SECISBP2L PE=1 SV=3	0	54.9661	13.9873	12	19	12	1	1101	121.7	6.04	17	2
FALSE	High	Master Protein	Q9NYU2	UDP-glucose:glycoprotein glucosyltransferase 1 OS=Homo sapiens GN=UGGT1 PE=1 SV=3	0	53.3027	9.51768	15	19	15	1	1555	177.078	5.63	17	2
FALSE	High	Master Protein	O60841	Eukaryotic translation initiation factor 5B OS=Homo sapiens GN=EIF5B PE=1 SV=4	0	201.853	24.0164	31	63	30	1	1220	138.742	5.49	16	47
FALSE	High	Master Protein	Q14244	Ensconsin OS=Homo sapiens GN=MAP7 PE=1 SV=1	0	73.1107	21.8959	19	48	18	1	749	84.002	9.61	16	32
FALSE	High	Master Protein	P82673	28S ribosomal protein S35, mitochondrial OS=Homo sapiens GN=MRPS35 PE=1 SV=1	0	113.203	42.4149	12	39	12	1	323	36.821	8.24	16	23
FALSE	High	Master Protein	P62995	Transformer-2 protein homolog beta OS=Homo sapiens GN=TRA2B PE=1 SV=1	0	58.8671	30.5556	11	39	9	1	288	33.646	11.25	16	23
FALSE	High	Master Protein	Q13243	Serine/arginine-rich splicing factor 5 OS=Homo sapiens GN=SRSF5 PE=1 SV=1	0	44.2754	22.7941	7	39	6	1	272	31.245	11.59	16	23
FALSE	High	Master Protein	O75319	RNA/RNP complex-1-interacting phosphatase OS=Homo sapiens GN=DUSP11 PE=1 SV=1	0	87.0729	48.1818	15	38	15	1	330	38.915	9.41	16	22
FALSE	High	Master Protein	P38919	Eukaryotic initiation factor 4A-III OS=Homo sapiens GN=EIF4A3 PE=1 SV=4	0	73.6778	29.927	14	37	11	1	411	46.841	6.73	16	21
FALSE	High	Master Protein	O94776	Metastasis-associated protein MTA2 OS=Homo sapiens GN=MTA2 PE=1 SV=1	0	94.7797	29.9401	19	36	17	1	668	74.976	9.66	16	20
FALSE	High	Master Protein	Q14240	Eukaryotic initiation factor 4A-II OS=Homo sapiens GN=EIF4A2 PE=1 SV=2	0	50.8869	26.2899	12	36	1	1	407	46.373	5.48	16	20
FALSE	High	Master Protein	P68431	Histone H3.1 OS=Homo sapiens GN=HIST1H3A PE=1 SV=2	0	12.2426	19.8529	4	35	4	1	136	15.394	11.12	16	19
FALSE	High	Master Protein	Q7KZF4	Staphylococcal nuclease domain-containing protein 1 OS=Homo sapiens GN=SND1 PE=1 SV=1	0	84.893	25.9341	20	34	20	1	910	101.934	7.17	16	18
FALSE	High	Master Protein	P60228	Eukaryotic translation initiation factor 3 subunit E OS=Homo sapiens GN=EIF3E PE=1 SV=1	0	60.4529	26.7416	12	30	12	1	445	52.187	6.04	16	14
FALSE	High	Master Protein	O15371	Eukaryotic translation initiation factor 3 subunit D OS=Homo sapiens GN=EIF3D PE=1 SV=1	0	83.6342	26.4599	14	29	14	1	548	63.932	6.05	16	13
FALSE	High	Master Protein	P50995	Annexin A11 OS=Homo sapiens GN=ANXA11 PE=1 SV=1	0	79.7783	34.6535	16	29	15	1	505	54.355	7.65	16	13
FALSE	High	Master Protein	O94979	Protein transport protein Sec31A OS=Homo sapiens GN=SEC31A PE=1 SV=3	0	62.0754	14.5082	16	28	16	1	1220	132.931	6.89	16	12
FALSE	High	Master Protein	Q92785	Zinc finger protein ubi-d4 OS=Homo sapiens GN=DPF2 PE=1 SV=2	0	56.5145	21.7391	9	28	8	1	391	44.127	6.33	16	12
FALSE	High	Master Protein	P30101	Protein disulfide-isomerase A3 OS=Homo sapiens GN=PDIA3 PE=1 SV=4	0	53.1582	25.3465	14	28	14	1	505	56.747	6.35	16	12
FALSE	High	Master Protein	P40926	Malate dehydrogenase, mitochondrial OS=Homo sapiens GN=MDH2 PE=1 SV=3	0	51.688	33.1361	9	28	9	1	338	35.481	8.68	16	12
FALSE	High	Master Protein	Q9UHI6	Probable ATP-dependent RNA helicase DDX20 OS=Homo sapiens GN=DDX20 PE=1 SV=2	0	55.9102	18.0825	13	24	13	1	824	92.183	6.95	16	8
FALSE	High	Master Protein	Q05519	Serine/arginine-rich splicing factor 11 OS=Homo sapiens GN=SRSF11 PE=1 SV=1	0	32.6166	15.2893	5	24	5	1	484	53.51	10.52	16	8
FALSE	High	Master Protein	Q10570	Cleavage and polyadenylation specificity factor subunit 1 OS=Homo sapiens GN=CPSF1 PE=1 SV=2	0	60.6271	12.0582	17	23	17	1	1443	160.782	6.4	16	7
FALSE	High	Master Protein	Q8IWZ3	Ankyrin repeat and KH domain-containing protein 1 OS=Homo sapiens GN=ANKHD1 PE=1 SV=1	0	59.0075	6.1369	14	15	4	1	2542	269.291	5.73	15
FALSE	High	Master Protein	Q9UMS4	Pre-mRNA-processing factor 19 OS=Homo sapiens GN=PRPF19 PE=1 SV=1	0	168.524	45.0397	18	58	18	1	504	55.146	6.61	15	43
FALSE	High	Master Protein	P62140	Serine/threonine-protein phosphatase PP1-beta catalytic subunit OS=Homo sapiens GN=PPP1CB PE=1 SV=3	0	136.763	50.7645	16	56	5	1	327	37.163	6.19	15	41
FALSE	High	Master Protein	Q8NHQ9	ATP-dependent RNA helicase DDX55 OS=Homo sapiens GN=DDX55 PE=1 SV=3	0	145.257	46.5	22	48	22	1	600	68.503	9.25	15	33
FALSE	High	Master Protein	P09661	U2 small nuclear ribonucleoprotein A' OS=Homo sapiens GN=SNRPA1 PE=1 SV=2	0	97.2803	43.5294	18	46	18	1	255	28.398	8.62	15	31
FALSE	High	Master Protein	O14974	Protein phosphatase 1 regulatory subunit 12A OS=Homo sapiens GN=PPP1R12A PE=1 SV=1	0	108.667	20.9709	22	44	22	1	1030	115.211	5.4	15	29
FALSE	High	Master Protein	Q99832	T-complex protein 1 subunit eta OS=Homo sapiens GN=CCT7 PE=1 SV=2	0	132.865	49.3554	23	43	23	1	543	59.329	7.65	15	28
FALSE	High	Master Protein	Q08170	Serine/arginine-rich splicing factor 4 OS=Homo sapiens GN=SRSF4 PE=1 SV=2	0	21.5129	8.90688	5	42	3	1	494	56.645	11.52	15	27
FALSE	High	Master Protein	Q8IVS2	Malonyl-CoA-acyl carrier protein transacylase, mitochondrial OS=Homo sapiens GN=MCAT PE=1 SV=2	0	65.546	28.2051	10	40	10	1	390	42.934	8.72	15	25
FALSE	High	Master Protein	Q8WVV9	Heterogeneous nuclear ribonucleoprotein L-like OS=Homo sapiens GN=HNRNPLL PE=1 SV=1	0	79.6474	39.4834	15	39	14	1	542	60.045	7.72	15	24
FALSE	High	Master Protein	Q9UNQ2	Probable dimethyladenosine transferase OS=Homo sapiens GN=DIMT1 PE=1 SV=1	0	114.101	59.1054	17	38	17	1	313	35.214	9.99	15	23
FALSE	High	Master Protein	Q86UE4	Protein LYRIC OS=Homo sapiens GN=MTDH PE=1 SV=2	0	65.2956	28.866	11	38	11	1	582	63.799	9.32	15	23
FALSE	High	Master Protein	Q03468	DNA excision repair protein ERCC-6 OS=Homo sapiens GN=ERCC6 PE=1 SV=1	0	91.5981	16.8118	22	35	22	1	1493	168.311	8.09	15	20
FALSE	High	Master Protein	Q96CM3	RNA pseudouridylate synthase domain-containing protein 4 OS=Homo sapiens GN=RPUSD4 PE=1 SV=1	0	53.5215	24.6684	11	34	11	1	377	42.178	9.88	15	19
FALSE	High	Master Protein	P35659	Protein DEK OS=Homo sapiens GN=DEK PE=1 SV=1	0	52.5054	24.2667	10	32	10	1	375	42.648	8.56	15	17
FALSE	High	Master Protein	P04843	Dolichyl-diphosphooligosaccharide--protein glycosyltransferase subunit 1 OS=Homo sapiens GN=RPN1 PE=1 SV=1	0	82.2248	31.1367	16	31	16	1	607	68.527	6.38	15	16
FALSE	High	Master Protein	P35241	Radixin OS=Homo sapiens GN=RDX PE=1 SV=1	0	31.0974	13.5506	10	31	2	1	583	68.521	6.37	15	16
FALSE	High	Master Protein	P49756	RNA-binding protein 25 OS=Homo sapiens GN=RBM25 PE=1 SV=3	0	52.0677	11.5065	11	30	11	1	843	100.124	6.32	15	15
FALSE	High	Master Protein	P35232	Prohibitin OS=Homo sapiens GN=PHB PE=1 SV=1	0	42.5535	39.7059	12	30	12	1	272	29.786	5.76	15	15
FALSE	High	Master Protein	Q9UKB1	F-box/WD repeat-containing protein 11 OS=Homo sapiens GN=FBXW11 PE=1 SV=1	0	56.5449	28.9668	16	29	8	1	542	62.051	7.12	15	14
FALSE	High	Master Protein	Q86VP1	Tax1-binding protein 1 OS=Homo sapiens GN=TAX1BP1 PE=1 SV=2	0	58.5988	22.4335	16	28	16	1	789	90.82	5.43	15	13
FALSE	High	Master Protein	Q6Q0C0	E3 ubiquitin-protein ligase TRAF7 OS=Homo sapiens GN=TRAF7 PE=1 SV=1	0	52.6262	19.7015	12	27	12	1	670	74.561	7.15	15	12
FALSE	High	Master Protein	Q01130	Serine/arginine-rich splicing factor 2 OS=Homo sapiens GN=SRSF2 PE=1 SV=4	0	9.03126	7.69231	3	27	3	1	221	25.461	11.85	15	12
FALSE	High	Master Protein	Q07065	Cytoskeleton-associated protein 4 OS=Homo sapiens GN=CKAP4 PE=1 SV=2	0	76.5215	29.402	15	26	14	1	602	65.983	5.92	15	11
FALSE	High	Master Protein	P04792	Heat shock protein beta-1 OS=Homo sapiens GN=HSPB1 PE=1 SV=2	0	61.9639	47.3171	11	26	11	1	205	22.768	6.4	15	11
FALSE	High	Master Protein	Q15645	Pachytene checkpoint protein 2 homolog OS=Homo sapiens GN=TRIP13 PE=1 SV=2	0	50.1281	25.463	12	26	12	1	432	48.52	6.09	15	11
FALSE	High	Master Protein	Q9UKV3	Apoptotic chromatin condensation inducer in the nucleus OS=Homo sapiens GN=ACIN1 PE=1 SV=2	0	41.1985	7.75541	12	21	12	1	1341	151.771	6.43	15	6
FALSE	High	Master Protein	P49750	YLP motif-containing protein 1 OS=Homo sapiens GN=YLPM1 PE=1 SV=3	0	56.7165	7.89339	11	17	11	1	1951	219.849	6.57	15	2
FALSE	High	Master Protein	Q9BQ39	ATP-dependent RNA helicase DDX50 OS=Homo sapiens GN=DDX50 PE=1 SV=1	0	109.416	28.6296	20	56	17	1	737	82.514	9.17	14	42
FALSE	High	Master Protein	Q9NZM1	Myoferlin OS=Homo sapiens GN=MYOF PE=1 SV=1	0	127.259	18.6317	35	54	35	1	2061	234.561	6.18	14	40
FALSE	High	Master Protein	Q16666	Gamma-interferon-inducible protein 16 OS=Homo sapiens GN=IFI16 PE=1 SV=3	0	124.57	32.1019	23	53	23	1	785	88.199	9.28	14	39
FALSE	High	Master Protein	Q16643	Drebrin OS=Homo sapiens GN=DBN1 PE=1 SV=4	0	122	28.8136	17	51	17	1	649	71.385	4.45	14	37
FALSE	High	Master Protein	Q10567	AP-1 complex subunit beta-1 OS=Homo sapiens GN=AP1B1 PE=1 SV=2	0	110.57	21.7071	21	45	6	1	949	104.57	5.06	14	31
FALSE	High	Master Protein	P50914	60S ribosomal protein L14 OS=Homo sapiens GN=RPL14 PE=1 SV=4	0	46.2135	28.3721	7	40	7	1	215	23.417	10.93	14	26
FALSE	High	Master Protein	Q16795	NADH dehydrogenase [ubiquinone] 1 alpha subcomplex subunit 9, mitochondrial OS=Homo sapiens GN=NDUFA9 PE=1 SV=2	0	58.392	40.0531	14	35	14	1	377	42.483	9.8	14	21
FALSE	High	Master Protein	O60814	Histone H2B type 1-K OS=Homo sapiens GN=HIST1H2BK PE=1 SV=3	0	21.3713	34.9206	4	31	1	1	126	13.882	10.32	14	17
FALSE	High	Master Protein	P06899	Histone H2B type 1-J OS=Homo sapiens GN=HIST1H2BJ PE=1 SV=3	0	21.6696	34.9206	4	30	1	1	126	13.896	10.32	14	16
FALSE	High	Master Protein	Q8IWR0	Zinc finger CCCH domain-containing protein 7A OS=Homo sapiens GN=ZC3H7A PE=1 SV=1	0	47.6773	14.3151	12	27	12	1	971	110.466	7.3	14	13
FALSE	High	Master Protein	P34932	Heat shock 70 kDa protein 4 OS=Homo sapiens GN=HSPA4 PE=1 SV=4	0	57.8515	15.119	12	25	11	1	840	94.271	5.19	14	11
FALSE	High	Master Protein	Q9BYD1	39S ribosomal protein L13, mitochondrial OS=Homo sapiens GN=MRPL13 PE=1 SV=1	0	45.065	59.5506	10	25	10	1	178	20.679	9.16	14	11
FALSE	High	Master Protein	Q8NE35	Cytoplasmic polyadenylation element-binding protein 3 OS=Homo sapiens GN=CPEB3 PE=1 SV=2	0	35.4617	11.0315	7	25	1	1	698	75.966	7.03	14	11
FALSE	High	Master Protein	P22314	Ubiquitin-like modifier-activating enzyme 1 OS=Homo sapiens GN=UBA1 PE=1 SV=3	0	89.6021	20.5104	18	24	18	1	1058	117.774	5.76	14	10
FALSE	High	Master Protein	P49411	Elongation factor Tu, mitochondrial OS=Homo sapiens GN=TUFM PE=1 SV=2	0	55.2943	34.9558	14	23	14	1	452	49.51	7.61	14	9
FALSE	High	Master Protein	Q9Y490	Talin-1 OS=Homo sapiens GN=TLN1 PE=1 SV=3	0	55.9503	7.35931	15	15	15	1	2541	269.599	6.07	14	1
FALSE	High	Master Protein	Q9C0C2	182 kDa tankyrase-1-binding protein OS=Homo sapiens GN=TNKS1BP1 PE=1 SV=4	0	46.7651	9.2539	13	15	13	1	1729	181.685	4.86	14	1
FALSE	High	Master Protein	Q12789	General transcription factor 3C polypeptide 1 OS=Homo sapiens GN=GTF3C1 PE=1 SV=4	0	34.7339	5.9744	11	13	11	1	2109	238.725	7.3	13
FALSE	High	Master Protein	P62136	Serine/threonine-protein phosphatase PP1-alpha catalytic subunit OS=Homo sapiens GN=PPP1CA PE=1 SV=1	0	142.117	56.9697	18	50	4	1	330	37.488	6.33	13	37
FALSE	High	Master Protein	O60832	H/ACA ribonucleoprotein complex subunit 4 OS=Homo sapiens GN=DKC1 PE=1 SV=3	0	102.622	37.1595	19	47	19	1	514	57.638	9.42	13	34
FALSE	High	Master Protein	Q13895	Bystin OS=Homo sapiens GN=BYSL PE=1 SV=3	0	124.99	47.5973	22	45	22	1	437	49.57	8.12	13	32
FALSE	High	Master Protein	P62913	60S ribosomal protein L11 OS=Homo sapiens GN=RPL11 PE=1 SV=2	0	68.074	34.8315	11	38	11	1	178	20.24	9.6	13	25
FALSE	High	Master Protein	O95793	Double-stranded RNA-binding protein Staufen homolog 1 OS=Homo sapiens GN=STAU1 PE=1 SV=2	0	73.3491	24.6101	13	36	12	1	577	63.143	9.44	13	23
FALSE	High	Master Protein	Q92665	28S ribosomal protein S31, mitochondrial OS=Homo sapiens GN=MRPS31 PE=1 SV=3	0	74.8813	33.9241	13	35	13	1	395	45.29	9.29	13	22
FALSE	High	Master Protein	P32969	60S ribosomal protein L9 OS=Homo sapiens GN=RPL9 PE=1 SV=1	0	52.3904	48.4375	11	34	11	1	192	21.85	9.95	13	21
FALSE	High	Master Protein	P29692	Elongation factor 1-delta OS=Homo sapiens GN=EEF1D PE=1 SV=5	0	61.4525	42.7046	12	32	12	1	281	31.103	5.01	13	19
FALSE	High	Master Protein	P26639	Threonine--tRNA ligase, cytoplasmic OS=Homo sapiens GN=TARS PE=1 SV=3	0	56.8742	21.8534	15	29	15	1	723	83.382	6.67	13	16
FALSE	High	Master Protein	Q9NX07	tRNA selenocysteine 1-associated protein 1 OS=Homo sapiens GN=TRNAU1AP PE=1 SV=1	0	49.0398	27.5261	8	28	8	1	287	32.477	4.74	13	15
FALSE	High	Master Protein	Q92598	Heat shock protein 105 kDa OS=Homo sapiens GN=HSPH1 PE=1 SV=1	0	66.7069	20.6294	16	27	14	1	858	96.804	5.39	13	14
FALSE	High	Master Protein	O75340	Programmed cell death protein 6 OS=Homo sapiens GN=PDCD6 PE=1 SV=1	0	45.5629	32.4607	8	27	8	1	191	21.855	5.4	13	14
FALSE	High	Master Protein	Q86U42	Polyadenylate-binding protein 2 OS=Homo sapiens GN=PABPN1 PE=1 SV=3	0	37.3409	13.0719	6	27	6	1	306	32.729	5.06	13	14
FALSE	High	Master Protein	Q96EY1	DnaJ homolog subfamily A member 3, mitochondrial OS=Homo sapiens GN=DNAJA3 PE=1 SV=2	0	70.319	24.5833	10	26	10	1	480	52.456	9.26	13	13
FALSE	High	Master Protein	Q13162	Peroxiredoxin-4 OS=Homo sapiens GN=PRDX4 PE=1 SV=1	0	42.178	32.1033	9	26	6	1	271	30.521	6.29	13	13
FALSE	High	Master Protein	Q8N5A5	Zinc finger CCCH-type with G patch domain-containing protein OS=Homo sapiens GN=ZGPAT PE=1 SV=3	0	63.022	26.9303	13	24	13	1	531	57.324	5.43	13	11
FALSE	High	Master Protein	O15014	Zinc finger protein 609 OS=Homo sapiens GN=ZNF609 PE=1 SV=2	0	53.7721	11.9064	11	22	11	1	1411	151.098	8.03	13	9
FALSE	High	Master Protein	Q9BYK8	Helicase with zinc finger domain 2 OS=Homo sapiens GN=HELZ2 PE=1 SV=6	0	40.6177	5.17176	12	12	12	1	2649	294.465	7.49	12
FALSE	High	Master Protein	P14923	Junction plakoglobin OS=Homo sapiens GN=JUP PE=1 SV=3	0	193.662	46.3087	27	83	23	1	745	81.693	6.14	12	71
FALSE	High	Master Protein	P47756	F-actin-capping protein subunit beta OS=Homo sapiens GN=CAPZB PE=1 SV=4	0	188.555	54.1516	18	75	18	1	277	31.331	5.59	12	63
FALSE	High	Master Protein	Q14690	Protein RRP5 homolog OS=Homo sapiens GN=PDCD11 PE=1 SV=3	0	137.518	21.0583	35	53	35	1	1871	208.57	8.87	12	41
FALSE	High	Master Protein	Q96PV6	Leukocyte receptor cluster member 8 OS=Homo sapiens GN=LENG8 PE=1 SV=2	0	125.658	32.3492	22	44	22	1	779	86.075	9.35	12	32
FALSE	High	Master Protein	P21796	Voltage-dependent anion-selective channel protein 1 OS=Homo sapiens GN=VDAC1 PE=1 SV=2	0	100.964	42.0495	14	35	13	1	283	30.754	8.54	12	23
FALSE	High	Master Protein	O43175	D-3-phosphoglycerate dehydrogenase OS=Homo sapiens GN=PHGDH PE=1 SV=4	0	67.2532	31.3321	15	34	15	1	533	56.614	6.71	12	22
FALSE	High	Master Protein	P61981	14-3-3 protein gamma OS=Homo sapiens GN=YWHAG PE=1 SV=2	0	48.8106	27.1255	8	32	3	1	247	28.285	4.89	12	20
FALSE	High	Master Protein	P46778	60S ribosomal protein L21 OS=Homo sapiens GN=RPL21 PE=1 SV=2	0	67.248	50.625	10	31	10	1	160	18.553	10.49	12	19
FALSE	High	Master Protein	O14556	Glyceraldehyde-3-phosphate dehydrogenase, testis-specific OS=Homo sapiens GN=GAPDHS PE=1 SV=2	0	8.69277	4.41176	2	31	1	1	408	44.473	8.19	12	19
FALSE	High	Master Protein	P18669	Phosphoglycerate mutase 1 OS=Homo sapiens GN=PGAM1 PE=1 SV=2	0	16.4178	13.7795	3	30	3	1	254	28.786	7.18	12	18
FALSE	High	Master Protein	P48729	Casein kinase I isoform alpha OS=Homo sapiens GN=CSNK1A1 PE=1 SV=2	0	67.2481	28.1899	9	29	9	1	337	38.89	9.57	12	17
FALSE	High	Master Protein	Q12824	SWI/SNF-related matrix-associated actin-dependent regulator of chromatin subfamily B member 1 OS=Homo sapiens GN=SMARCB1 PE=1 SV=2	0	82.2806	37.6623	10	28	10	1	385	44.113	6.23	12	16
FALSE	High	Master Protein	Q8IZH2	5'-3' exoribonuclease 1 OS=Homo sapiens GN=XRN1 PE=1 SV=1	0	74.4007	12.3681	20	28	20	1	1706	193.985	7.21	12	16
FALSE	High	Master Protein	Q96T37	Putative RNA-binding protein 15 OS=Homo sapiens GN=RBM15 PE=1 SV=2	0	65.5878	18.4237	16	28	14	1	977	107.124	10.08	12	16
FALSE	High	Master Protein	P27816	Microtubule-associated protein 4 OS=Homo sapiens GN=MAP4 PE=1 SV=3	0	57.5111	12.5	13	28	13	1	1152	120.93	5.43	12	16
FALSE	High	Master Protein	O75494	Serine/arginine-rich splicing factor 10 OS=Homo sapiens GN=SRSF10 PE=1 SV=1	0	34.2646	22.1374	6	28	6	1	262	31.282	11.27	12	16
FALSE	High	Master Protein	O95232	Luc7-like protein 3 OS=Homo sapiens GN=LUC7L3 PE=1 SV=2	0	67.007	20.8333	10	27	10	1	432	51.435	9.79	12	15
FALSE	High	Master Protein	Q9Y4K0	Lysyl oxidase homolog 2 OS=Homo sapiens GN=LOXL2 PE=1 SV=1	0	47.1187	15.5039	14	27	14	1	774	86.668	6.38	12	15
FALSE	High	Master Protein	Q13200	26S proteasome non-ATPase regulatory subunit 2 OS=Homo sapiens GN=PSMD2 PE=1 SV=3	0	68.6579	17.7313	13	26	13	1	908	100.136	5.2	12	14
FALSE	High	Master Protein	Q9NQ29	Putative RNA-binding protein Luc7-like 1 OS=Homo sapiens GN=LUC7L PE=1 SV=1	0	42.3127	22.372	9	26	5	1	371	43.701	9.92	12	14
FALSE	High	Master Protein	Q9NXV6	CDKN2A-interacting protein OS=Homo sapiens GN=CDKN2AIP PE=1 SV=3	0	82.4208	38.2759	17	24	17	1	580	61.088	9.01	12	12
FALSE	High	Master Protein	P62826	GTP-binding nuclear protein Ran OS=Homo sapiens GN=RAN PE=1 SV=3	0	35.6106	26.3889	6	22	6	1	216	24.408	7.49	12	10
FALSE	High	Master Protein	P57772	Selenocysteine-specific elongation factor OS=Homo sapiens GN=EEFSEC PE=1 SV=4	0	45.3538	19.4631	11	21	11	1	596	65.263	8.35	12	9
FALSE	High	Master Protein	Q8IWX8	Calcium homeostasis endoplasmic reticulum protein OS=Homo sapiens GN=CHERP PE=1 SV=3	0	52.2236	14.3013	12	20	12	1	916	103.637	9.04	12	8
FALSE	High	Master Protein	Q9BZE1	39S ribosomal protein L37, mitochondrial OS=Homo sapiens GN=MRPL37 PE=1 SV=2	0	44.354	26.2411	11	20	11	1	423	48.087	8.59	12	8
FALSE	High	Master Protein	P18206	Vinculin OS=Homo sapiens GN=VCL PE=1 SV=4	0	54.2252	14.3739	12	19	12	1	1134	123.722	5.66	12	7
FALSE	High	Master Protein	P31948	Stress-induced-phosphoprotein 1 OS=Homo sapiens GN=STIP1 PE=1 SV=1	0	44.671	27.256	13	17	13	1	543	62.599	6.8	12	5
FALSE	High	Master Protein	Q86UP2	Kinectin OS=Homo sapiens GN=KTN1 PE=1 SV=1	0	43.739	11.1275	13	16	13	1	1357	156.179	5.64	12	4
FALSE	High	Master Protein	P31153	S-adenosylmethionine synthase isoform type-2 OS=Homo sapiens GN=MAT2A PE=1 SV=1	0	40.132	21.2658	10	16	10	1	395	43.633	6.48	12	4
FALSE	High	Master Protein	P26006	Integrin alpha-3 OS=Homo sapiens GN=ITGA3 PE=1 SV=5	0	23.8218	6.94577	7	14	7	1	1051	116.538	6.77	12	2
FALSE	High	Master Protein	Q9BQ75	Protein CMSS1 OS=Homo sapiens GN=CMSS1 PE=1 SV=2	0	86.0824	45.1613	16	48	16	1	279	31.864	9.19	11	37
FALSE	High	Master Protein	P13010	X-ray repair cross-complementing protein 5 OS=Homo sapiens GN=XRCC5 PE=1 SV=3	0	128.778	34.153	25	43	25	1	732	82.652	5.81	11	32
FALSE	High	Master Protein	Q86XZ4	Spermatogenesis-associated serine-rich protein 2 OS=Homo sapiens GN=SPATS2 PE=1 SV=1	0	104.569	38.3486	18	40	18	1	545	59.508	8.9	11	29
FALSE	High	Master Protein	Q9P2E9	Ribosome-binding protein 1 OS=Homo sapiens GN=RRBP1 PE=1 SV=4	0	97.7462	21.2057	25	37	25	1	1410	152.381	8.6	11	26
FALSE	High	Master Protein	Q9UHB9	Signal recognition particle subunit SRP68 OS=Homo sapiens GN=SRP68 PE=1 SV=2	0	85.9367	28.3892	16	35	16	1	627	70.686	8.56	11	24
FALSE	High	Master Protein	Q8NE71	ATP-binding cassette sub-family F member 1 OS=Homo sapiens GN=ABCF1 PE=1 SV=2	0	80.5452	23.5503	17	34	17	1	845	95.866	6.8	11	23
FALSE	High	Master Protein	O76094	Signal recognition particle subunit SRP72 OS=Homo sapiens GN=SRP72 PE=1 SV=3	0	118.706	35.6185	19	32	19	1	671	74.56	9.26	11	21
FALSE	High	Master Protein	Q96P11	Probable 28S rRNA (cytosine-C(5))-methyltransferase OS=Homo sapiens GN=NSUN5 PE=1 SV=2	0	60.9199	34.2657	13	31	13	1	429	46.662	8.62	11	20
FALSE	High	Master Protein	Q15434	RNA-binding motif, single-stranded-interacting protein 2 OS=Homo sapiens GN=RBMS2 PE=1 SV=1	0	62.7902	22.113	7	30	6	1	407	43.931	9.07	11	19
FALSE	High	Master Protein	Q9P2E3	NFX1-type zinc finger-containing protein 1 OS=Homo sapiens GN=ZNFX1 PE=2 SV=2	0	83.7652	14.0772	22	28	22	1	1918	220.084	7.3	11	17
FALSE	High	Master Protein	Q9H0S4	Probable ATP-dependent RNA helicase DDX47 OS=Homo sapiens GN=DDX47 PE=1 SV=1	0	70.9337	29.6703	12	28	12	1	455	50.615	9.1	11	17
FALSE	High	Master Protein	Q9GZR7	ATP-dependent RNA helicase DDX24 OS=Homo sapiens GN=DDX24 PE=1 SV=1	0	53.4678	21.6531	16	27	16	1	859	96.271	9.06	11	16
FALSE	High	Master Protein	P62851	40S ribosomal protein S25 OS=Homo sapiens GN=RPS25 PE=1 SV=1	0	28.1847	34.4	7	27	7	1	125	13.734	10.11	11	16
FALSE	High	Master Protein	P63104	14-3-3 protein zeta/delta OS=Homo sapiens GN=YWHAZ PE=1 SV=1	0	64.8785	45.7143	11	26	9	1	245	27.728	4.79	11	15
FALSE	High	Master Protein	O43684	Mitotic checkpoint protein BUB3 OS=Homo sapiens GN=BUB3 PE=1 SV=1	0	44.3136	30.7927	12	25	12	1	328	37.131	6.84	11	14
FALSE	High	Master Protein	Q96DV4	39S ribosomal protein L38, mitochondrial OS=Homo sapiens GN=MRPL38 PE=1 SV=2	0	34.2833	18.4211	7	24	7	1	380	44.568	7.53	11	13
FALSE	High	Master Protein	Q6STE5	SWI/SNF-related matrix-associated actin-dependent regulator of chromatin subfamily D member 3 OS=Homo sapiens GN=SMARCD3 PE=1 SV=1	0	51.7756	20.4969	10	21	2	1	483	54.981	9.35	11	10
FALSE	High	Master Protein	Q96AG4	Leucine-rich repeat-containing protein 59 OS=Homo sapiens GN=LRRC59 PE=1 SV=1	0	50.4575	25.4072	7	21	7	1	307	34.909	9.57	11	10
FALSE	High	Master Protein	Q14145	Kelch-like ECH-associated protein 1 OS=Homo sapiens GN=KEAP1 PE=1 SV=2	0	44.2302	19.2308	11	20	11	1	624	69.621	6.44	11	9
FALSE	High	Master Protein	Q9Y678	Coatomer subunit gamma-1 OS=Homo sapiens GN=COPG1 PE=1 SV=1	0	41.9363	11.3272	9	20	9	1	874	97.655	5.47	11	9
FALSE	High	Master Protein	Q9P2N5	RNA-binding protein 27 OS=Homo sapiens GN=RBM27 PE=1 SV=2	0	20.344	5.66038	6	18	4	1	1060	118.645	9.19	11	7
FALSE	High	Master Protein	P00966	Argininosuccinate synthase OS=Homo sapiens GN=ASS1 PE=1 SV=2	0	37.3145	33.2524	12	17	12	1	412	46.501	8.02	11	6
FALSE	High	Master Protein	P32119	Peroxiredoxin-2 OS=Homo sapiens GN=PRDX2 PE=1 SV=5	0	32.8321	31.3131	9	17	8	1	198	21.878	5.97	11	6
FALSE	High	Master Protein	O95831	Apoptosis-inducing factor 1, mitochondrial OS=Homo sapiens GN=AIFM1 PE=1 SV=1	0	60.8356	23.6542	10	16	10	1	613	66.859	8.95	11	5
FALSE	High	Master Protein	Q96KG9	N-terminal kinase-like protein OS=Homo sapiens GN=SCYL1 PE=1 SV=1	0	39.4459	15.5941	10	16	10	1	808	89.575	6.3	11	5
FALSE	High	Master Protein	Q96A35	39S ribosomal protein L24, mitochondrial OS=Homo sapiens GN=MRPL24 PE=1 SV=1	0	38.6232	34.2593	7	16	7	1	216	24.899	9.29	11	5
FALSE	High	Master Protein	Q8NHV4	Protein NEDD1 OS=Homo sapiens GN=NEDD1 PE=1 SV=1	0	27.3525	8.18182	4	12	4	1	660	71.921	7.97	11	1
FALSE	High	Master Protein	O75691	Small subunit processome component 20 homolog OS=Homo sapiens GN=UTP20 PE=1 SV=3	0	33.6795	3.8061	10	10	10	1	2785	318.182	7.39	10
FALSE	High	Master Protein	P11717	Cation-independent mannose-6-phosphate receptor OS=Homo sapiens GN=IGF2R PE=1 SV=3	0	30.2658	4.17503	10	10	10	1	2491	274.199	5.94	10
FALSE	High	Master Protein	O43739	Cytohesin-3 OS=Homo sapiens GN=CYTH3 PE=1 SV=2	0	185.983	63.25	27	82	16	1	400	46.319	5.47	10	72
FALSE	High	Master Protein	Q96C19	EF-hand domain-containing protein D2 OS=Homo sapiens GN=EFHD2 PE=1 SV=1	0	167.067	61.25	26	66	24	1	240	26.68	5.2	10	56
FALSE	High	Master Protein	Q8IVT2	Mitotic interactor and substrate of PLK1 OS=Homo sapiens GN=MISP PE=1 SV=1	0	153.495	47.8645	25	58	25	1	679	75.311	6.83	10	48
FALSE	High	Master Protein	P08708	40S ribosomal protein S17 OS=Homo sapiens GN=RPS17 PE=1 SV=2	0	83.5912	50.3704	10	54	10	1	135	15.54	9.85	10	44
FALSE	High	Master Protein	P52907	F-actin-capping protein subunit alpha-1 OS=Homo sapiens GN=CAPZA1 PE=1 SV=3	0	135.774	75.1748	16	48	12	1	286	32.902	5.69	10	38
FALSE	High	Master Protein	P36873	Serine/threonine-protein phosphatase PP1-gamma catalytic subunit OS=Homo sapiens GN=PPP1CC PE=1 SV=1	0	124.657	46.4396	15	40	1	1	323	36.96	6.54	10	30
FALSE	High	Master Protein	P08174	Complement decay-accelerating factor OS=Homo sapiens GN=CD55 PE=1 SV=4	0	69.7073	25.7218	10	39	10	1	381	41.374	7.59	10	29
FALSE	High	Master Protein	Q9UBU9	Nuclear RNA export factor 1 OS=Homo sapiens GN=NXF1 PE=1 SV=1	0	82.7306	24.0711	15	38	15	1	619	70.139	8.51	10	28
FALSE	High	Master Protein	P45880	Voltage-dependent anion-selective channel protein 2 OS=Homo sapiens GN=VDAC2 PE=1 SV=2	0	68.0256	44.898	11	30	11	1	294	31.547	7.56	10	20
FALSE	High	Master Protein	P30050	60S ribosomal protein L12 OS=Homo sapiens GN=RPL12 PE=1 SV=1	0	55.8079	56.3636	8	30	8	1	165	17.808	9.42	10	20
FALSE	High	Master Protein	Q9BRZ2	E3 ubiquitin-protein ligase TRIM56 OS=Homo sapiens GN=TRIM56 PE=1 SV=3	0	68.8915	23.8411	16	27	16	1	755	81.437	7.74	10	17
FALSE	High	Master Protein	P55209	Nucleosome assembly protein 1-like 1 OS=Homo sapiens GN=NAP1L1 PE=1 SV=1	0	61.7248	22.5064	8	27	7	1	391	45.346	4.46	10	17
FALSE	High	Master Protein	E9PAV3	Nascent polypeptide-associated complex subunit alpha, muscle-specific form OS=Homo sapiens GN=NACA PE=1 SV=1	0	66.8839	3.60924	7	26	7	1	2078	205.295	9.58	10	16
FALSE	High	Master Protein	Q8IY37	Probable ATP-dependent RNA helicase DHX37 OS=Homo sapiens GN=DHX37 PE=1 SV=1	0	66.9932	15.2982	17	24	17	1	1157	129.464	8.1	10	14
FALSE	High	Master Protein	Q6R327	Rapamycin-insensitive companion of mTOR OS=Homo sapiens GN=RICTOR PE=1 SV=1	0	55.9619	11.007	17	24	17	1	1708	192.097	7.47	10	14
FALSE	High	Master Protein	Q04917	14-3-3 protein eta OS=Homo sapiens GN=YWHAH PE=1 SV=4	0	30.2075	25.6098	8	24	5	1	246	28.201	4.84	10	14
FALSE	High	Master Protein	P38935	DNA-binding protein SMUBP-2 OS=Homo sapiens GN=IGHMBP2 PE=1 SV=3	0	56.8237	15.8107	15	23	15	1	993	109.082	8.97	10	13
FALSE	High	Master Protein	Q05048	Cleavage stimulation factor subunit 1 OS=Homo sapiens GN=CSTF1 PE=1 SV=1	0	51.5296	29.6984	11	23	11	1	431	48.327	6.58	10	13
FALSE	High	Master Protein	Q9UBV8	Peflin OS=Homo sapiens GN=PEF1 PE=1 SV=1	0	40.805	19.3662	7	23	7	1	284	30.361	6.54	10	13
FALSE	High	Master Protein	P30041	Peroxiredoxin-6 OS=Homo sapiens GN=PRDX6 PE=1 SV=3	0	40.6864	30.8036	11	23	11	1	224	25.019	6.38	10	13
FALSE	High	Master Protein	Q8IV48	3'-5' exoribonuclease 1 OS=Homo sapiens GN=ERI1 PE=1 SV=3	0	34.4503	25.5014	11	23	11	1	349	40.038	6.7	10	13
FALSE	High	Master Protein	P98175	RNA-binding protein 10 OS=Homo sapiens GN=RBM10 PE=1 SV=3	0	43.7827	15.914	11	22	10	1	930	103.469	5.97	10	12
FALSE	High	Master Protein	Q13547	Histone deacetylase 1 OS=Homo sapiens GN=HDAC1 PE=1 SV=1	0	41.5696	21.7842	9	22	4	1	482	55.068	5.48	10	12
FALSE	High	Master Protein	P08237	ATP-dependent 6-phosphofructokinase, muscle type OS=Homo sapiens GN=PFKM PE=1 SV=2	0	41.7006	16.6667	12	21	8	1	780	85.128	7.99	10	11
FALSE	High	Master Protein	Q9HBD1	Roquin-2 OS=Homo sapiens GN=RC3H2 PE=1 SV=2	0	39.6237	6.63308	8	21	4	1	1191	131.586	6.89	10	11
FALSE	High	Master Protein	P42766	60S ribosomal protein L35 OS=Homo sapiens GN=RPL35 PE=1 SV=2	0	27.0949	30.0813	5	21	5	1	123	14.543	11.05	10	11
FALSE	High	Master Protein	Q9NRX2	39S ribosomal protein L17, mitochondrial OS=Homo sapiens GN=MRPL17 PE=1 SV=1	0	26.8512	41.1429	8	20	8	1	175	20.038	10.11	10	10
FALSE	High	Master Protein	P17858	ATP-dependent 6-phosphofructokinase, liver type OS=Homo sapiens GN=PFKL PE=1 SV=6	0	46.5539	12.6923	8	19	4	1	780	84.964	7.5	10	9
FALSE	High	Master Protein	P30626	Sorcin OS=Homo sapiens GN=SRI PE=1 SV=1	0	30.5554	40.404	8	19	8	1	198	21.662	5.59	10	9
FALSE	High	Master Protein	O43432	Eukaryotic translation initiation factor 4 gamma 3 OS=Homo sapiens GN=EIF4G3 PE=1 SV=2	0	46.7621	4.92114	9	18	3	1	1585	176.542	5.38	10	8
FALSE	High	Master Protein	P22102	Trifunctional purine biosynthetic protein adenosine-3 OS=Homo sapiens GN=GART PE=1 SV=1	0	30.706	8.71287	9	18	9	1	1010	107.699	6.7	10	8
FALSE	High	Master Protein	Q9BYD2	39S ribosomal protein L9, mitochondrial OS=Homo sapiens GN=MRPL9 PE=1 SV=2	0	41.6116	26.2172	8	17	8	1	267	30.224	10.08	10	7
FALSE	High	Master Protein	P13667	Protein disulfide-isomerase A4 OS=Homo sapiens GN=PDIA4 PE=1 SV=2	0	30.9094	14.7287	9	15	9	1	645	72.887	5.07	10	5
FALSE	High	Master Protein	Q9NUD5	Zinc finger CCHC domain-containing protein 3 OS=Homo sapiens GN=ZCCHC3 PE=1 SV=1	0	22.4151	17.5743	7	15	7	1	404	43.591	8.53	10	5
FALSE	High	Master Protein	Q9UKK3	Poly [ADP-ribose] polymerase 4 OS=Homo sapiens GN=PARP4 PE=1 SV=3	0	32.2798	6.2645	11	14	11	1	1724	192.472	5.66	10	4
FALSE	High	Master Protein	Q9Y4E8	Ubiquitin carboxyl-terminal hydrolase 15 OS=Homo sapiens GN=USP15 PE=1 SV=3	0	35.1974	9.98981	10	11	10	1	981	112.348	5.22	10	1
FALSE	High	Master Protein	P49792	E3 SUMO-protein ligase RanBP2 OS=Homo sapiens GN=RANBP2 PE=1 SV=2	0	21.6078	2.20223	6	9	6	1	3224	357.974	6.2	9
FALSE	High	Master Protein	Q99418	Cytohesin-2 OS=Homo sapiens GN=CYTH2 PE=1 SV=2	0	212.281	62	25	105	15	1	400	46.517	5.54	9	96
FALSE	High	Master Protein	Q16891	MICOS complex subunit MIC60 OS=Homo sapiens GN=IMMT PE=1 SV=1	0	236.896	58.971	38	70	38	1	758	83.626	6.48	9	61
FALSE	High	Master Protein	Q96CW1	AP-2 complex subunit mu OS=Homo sapiens GN=AP2M1 PE=1 SV=2	0	156.401	58.8506	26	52	26	1	435	49.623	9.54	9	43
FALSE	High	Master Protein	Q9UPT8	Zinc finger CCCH domain-containing protein 4 OS=Homo sapiens GN=ZC3H4 PE=1 SV=3	0	102.38	25.1727	19	36	19	1	1303	140.169	6.27	9	27
FALSE	High	Master Protein	Q8TDD1	ATP-dependent RNA helicase DDX54 OS=Homo sapiens GN=DDX54 PE=1 SV=2	0	63.7351	20.8854	17	32	16	1	881	98.534	10.02	9	23
FALSE	High	Master Protein	P35249	Replication factor C subunit 4 OS=Homo sapiens GN=RFC4 PE=1 SV=2	0	80.1345	40.4959	15	30	15	1	363	39.657	8.02	9	21
FALSE	High	Master Protein	Q13045	Protein flightless-1 homolog OS=Homo sapiens GN=FLII PE=1 SV=2	0	81.2658	15.8392	18	29	18	1	1269	144.659	6.05	9	20
FALSE	High	Master Protein	Q92974	Rho guanine nucleotide exchange factor 2 OS=Homo sapiens GN=ARHGEF2 PE=1 SV=4	0	77.5067	21.0953	20	28	20	1	986	111.473	7.27	9	19
FALSE	High	Master Protein	Q92522	Histone H1x OS=Homo sapiens GN=H1FX PE=1 SV=1	0	45.9382	25.8216	8	28	8	1	213	22.474	10.76	9	19
FALSE	High	Master Protein	P35250	Replication factor C subunit 2 OS=Homo sapiens GN=RFC2 PE=1 SV=3	0	70.4729	43.2203	14	26	14	1	354	39.132	6.44	9	17
FALSE	High	Master Protein	P27348	14-3-3 protein theta OS=Homo sapiens GN=YWHAQ PE=1 SV=1	0	43.4368	40	9	26	6	1	245	27.747	4.78	9	17
FALSE	High	Master Protein	P22087	rRNA 2'-O-methyltransferase fibrillarin OS=Homo sapiens GN=FBL PE=1 SV=2	0	49.3307	28.972	9	25	9	1	321	33.763	10.18	9	16
FALSE	High	Master Protein	P31946	14-3-3 protein beta/alpha OS=Homo sapiens GN=YWHAB PE=1 SV=3	0	35.328	32.1138	8	25	3	1	246	28.065	4.83	9	16
FALSE	High	Master Protein	Q9NR56	Muscleblind-like protein 1 OS=Homo sapiens GN=MBNL1 PE=1 SV=2	0	24.3861	17.5258	7	25	7	1	388	41.79	8.9	9	16
FALSE	High	Master Protein	Q9BYG3	MKI67 FHA domain-interacting nucleolar phosphoprotein OS=Homo sapiens GN=NIFK PE=1 SV=1	0	66.8371	38.9078	12	24	12	1	293	34.201	9.88	9	15
FALSE	High	Master Protein	Q9NVN8	Guanine nucleotide-binding protein-like 3-like protein OS=Homo sapiens GN=GNL3L PE=1 SV=1	0	62.0691	30.9278	16	24	15	1	582	65.532	8.44	9	15
FALSE	High	Master Protein	Q9BZJ0	Crooked neck-like protein 1 OS=Homo sapiens GN=CRNKL1 PE=1 SV=4	0	51.6966	16.5094	14	24	14	1	848	100.389	8	9	15
FALSE	High	Master Protein	P05455	Lupus La protein OS=Homo sapiens GN=SSB PE=1 SV=2	0	47.4419	20.098	10	24	10	1	408	46.808	7.12	9	15
FALSE	High	Master Protein	Q9BUQ8	Probable ATP-dependent RNA helicase DDX23 OS=Homo sapiens GN=DDX23 PE=1 SV=3	0	58.7266	17.439	14	23	14	1	820	95.524	9.55	9	14
FALSE	High	Master Protein	Q13610	Periodic tryptophan protein 1 homolog OS=Homo sapiens GN=PWP1 PE=1 SV=1	0	55.4471	25.7485	11	23	11	1	501	55.793	4.77	9	14
FALSE	High	Master Protein	Q99755	Phosphatidylinositol 4-phosphate 5-kinase type-1 alpha OS=Homo sapiens GN=PIP5K1A PE=1 SV=1	0	54.7887	23.3096	12	23	12	1	562	62.594	8.21	9	14
FALSE	High	Master Protein	Q9HCS7	Pre-mRNA-splicing factor SYF1 OS=Homo sapiens GN=XAB2 PE=1 SV=2	0	43.3443	12.9825	12	22	12	1	855	99.946	6.23	9	13
FALSE	High	Master Protein	Q9ULX6	A-kinase anchor protein 8-like OS=Homo sapiens GN=AKAP8L PE=1 SV=3	0	33.2176	13.6223	10	22	10	1	646	71.604	5.07	9	13
FALSE	High	Master Protein	Q13501	Sequestosome-1 OS=Homo sapiens GN=SQSTM1 PE=1 SV=1	0	56.6712	25.2273	7	21	7	1	440	47.657	5.22	9	12
FALSE	High	Master Protein	Q9UJV9	Probable ATP-dependent RNA helicase DDX41 OS=Homo sapiens GN=DDX41 PE=1 SV=2	0	41.6153	22.0257	14	21	14	1	622	69.793	6.84	9	12
FALSE	High	Master Protein	Q9BWF3	RNA-binding protein 4 OS=Homo sapiens GN=RBM4 PE=1 SV=1	0	37.5626	27.1978	8	21	2	1	364	40.289	7.08	9	12
FALSE	High	Master Protein	Q13263	Transcription intermediary factor 1-beta OS=Homo sapiens GN=TRIM28 PE=1 SV=5	0	51.7665	14.1317	11	20	11	1	835	88.493	5.77	9	11
FALSE	High	Master Protein	Q15046	Lysine--tRNA ligase OS=Homo sapiens GN=KARS PE=1 SV=3	0	50.091	15.7454	10	20	10	1	597	68.005	6.35	9	11
FALSE	High	Master Protein	P55060	Exportin-2 OS=Homo sapiens GN=CSE1L PE=1 SV=3	0	48.7302	17.4047	13	20	13	1	971	110.346	5.77	9	11
FALSE	High	Master Protein	P15531	Nucleoside diphosphate kinase A OS=Homo sapiens GN=NME1 PE=1 SV=1	0	33.5181	44.0789	7	20	7	1	152	17.138	6.19	9	11
FALSE	High	Master Protein	Q14966	Zinc finger protein 638 OS=Homo sapiens GN=ZNF638 PE=1 SV=2	0	27.2389	4.44894	9	19	9	1	1978	220.488	6.38	9	10
FALSE	High	Master Protein	O00410	Importin-5 OS=Homo sapiens GN=IPO5 PE=1 SV=4	0	54.3847	11.9417	12	18	12	1	1097	123.55	4.94	9	9
FALSE	High	Master Protein	P41250	Glycine--tRNA ligase OS=Homo sapiens GN=GARS PE=1 SV=3	0	47.6464	19.0798	11	18	11	1	739	83.113	7.03	9	9
FALSE	High	Master Protein	P41252	Isoleucine--tRNA ligase, cytoplasmic OS=Homo sapiens GN=IARS PE=1 SV=2	0	38.0536	10.0634	13	18	13	1	1262	144.406	6.15	9	9
FALSE	High	Master Protein	Q86VP6	Cullin-associated NEDD8-dissociated protein 1 OS=Homo sapiens GN=CAND1 PE=1 SV=2	0	37.3614	9.10569	10	18	10	1	1230	136.289	5.78	9	9
FALSE	High	Master Protein	Q02218	2-oxoglutarate dehydrogenase, mitochondrial OS=Homo sapiens GN=OGDH PE=1 SV=3	0	24.918	8.11339	10	16	10	1	1023	115.861	6.86	9	7
FALSE	High	Master Protein	P16435	NADPH--cytochrome P450 reductase OS=Homo sapiens GN=POR PE=1 SV=2	0	42.798	19.7932	10	15	10	1	677	76.641	5.58	9	6
FALSE	High	Master Protein	P37802	Transgelin-2 OS=Homo sapiens GN=TAGLN2 PE=1 SV=3	0	29.3835	39.196	7	15	7	1	199	22.377	8.25	9	6
FALSE	High	Master Protein	Q03519	Antigen peptide transporter 2 OS=Homo sapiens GN=TAP2 PE=1 SV=1	0	20.4072	8.74636	6	15	6	1	686	75.616	8.02	9	6
FALSE	High	Master Protein	O95428	Papilin OS=Homo sapiens GN=PAPLN PE=2 SV=4	0	43.1609	9.31142	8	14	8	1	1278	137.612	6.89	9	5
FALSE	High	Master Protein	Q96TA2	ATP-dependent zinc metalloprotease YME1L1 OS=Homo sapiens GN=YME1L1 PE=1 SV=2	0	36.6703	12.5485	9	14	9	1	773	86.401	8.76	9	5
FALSE	High	Master Protein	O15020	Spectrin beta chain, non-erythrocytic 2 OS=Homo sapiens GN=SPTBN2 PE=1 SV=3	0	35.4903	3.51464	9	14	4	1	2390	271.157	6.11	9	5
FALSE	High	Master Protein	Q96AY3	Peptidyl-prolyl cis-trans isomerase FKBP10 OS=Homo sapiens GN=FKBP10 PE=1 SV=1	0	31.6171	16.4948	8	14	8	1	582	64.204	5.62	9	5
FALSE	High	Master Protein	B9A064	Immunoglobulin lambda-like polypeptide 5 OS=Homo sapiens GN=IGLL5 PE=2 SV=2	0.00758035	2.84894	3.73832	1	14	1	1	214	23.049	8.84	9	5
FALSE	High	Master Protein	P04003	C4b-binding protein alpha chain OS=Homo sapiens GN=C4BPA PE=1 SV=2	0	40.5346	17.9229	9	12	9	1	597	66.989	7.3	9	3
FALSE	High	Master Protein	Q8IX12	Cell division cycle and apoptosis regulator protein 1 OS=Homo sapiens GN=CCAR1 PE=1 SV=2	0	28.4958	7.47826	8	12	8	1	1150	132.739	5.76	9	3
FALSE	High	Master Protein	O15427	Monocarboxylate transporter 4 OS=Homo sapiens GN=SLC16A3 PE=1 SV=1	0	16.0981	8.17204	5	12	5	1	465	49.437	7.96	9	3
FALSE	High	Master Protein	Q9HCD5	Nuclear receptor coactivator 5 OS=Homo sapiens GN=NCOA5 PE=1 SV=2	0	28.0282	16.2349	7	11	7	1	579	65.496	9.6	9	2
FALSE	High	Master Protein	Q5SW79	Centrosomal protein of 170 kDa OS=Homo sapiens GN=CEP170 PE=1 SV=1	0	464.499	50.1263	71	143	70	1	1584	175.187	7.11	8	135
FALSE	High	Master Protein	Q13492	Phosphatidylinositol-binding clathrin assembly protein OS=Homo sapiens GN=PICALM PE=1 SV=2	0	122.391	36.8098	17	50	17	1	652	70.71	7.9	8	42
FALSE	High	Master Protein	P09496	Clathrin light chain A OS=Homo sapiens GN=CLTA PE=1 SV=1	0	45.8443	27.0161	11	37	11	1	248	27.06	4.51	8	29
FALSE	High	Master Protein	P62277	40S ribosomal protein S13 OS=Homo sapiens GN=RPS13 PE=1 SV=2	0	62.5431	52.3179	12	36	12	1	151	17.212	10.54	8	28
FALSE	High	Master Protein	P62879	Guanine nucleotide-binding protein G(I)/G(S)/G(T) subunit beta-2 OS=Homo sapiens GN=GNB2 PE=1 SV=3	0	60.091	24.7059	9	34	3	1	340	37.307	6	8	26
FALSE	High	Master Protein	Q96DH6	RNA-binding protein Musashi homolog 2 OS=Homo sapiens GN=MSI2 PE=1 SV=1	0	66.4158	30.7927	10	32	10	1	328	35.174	8.48	8	24
FALSE	High	Master Protein	Q96SB4	SRSF protein kinase 1 OS=Homo sapiens GN=SRPK1 PE=1 SV=2	0	96.7334	27.7863	17	31	14	1	655	74.278	6.16	8	23
FALSE	High	Master Protein	O14950	Myosin regulatory light chain 12B OS=Homo sapiens GN=MYL12B PE=1 SV=2	0	70.5583	54.6512	9	31	9	1	172	19.767	4.84	8	23
FALSE	High	Master Protein	P63096	Guanine nucleotide-binding protein G(i) subunit alpha-1 OS=Homo sapiens GN=GNAI1 PE=1 SV=2	0	64.6036	27.9661	10	31	4	1	354	40.335	5.97	8	23
FALSE	High	Master Protein	Q6UXN9	WD repeat-containing protein 82 OS=Homo sapiens GN=WDR82 PE=1 SV=1	0	84.9324	39.6166	14	30	14	1	313	35.056	7.69	8	22
FALSE	High	Master Protein	P08754	Guanine nucleotide-binding protein G(k) subunit alpha OS=Homo sapiens GN=GNAI3 PE=1 SV=3	0	62.471	29.3785	10	30	5	1	354	40.506	5.69	8	22
FALSE	High	Master Protein	Q96I25	Splicing factor 45 OS=Homo sapiens GN=RBM17 PE=1 SV=1	0	72.8413	30.4239	15	29	14	1	401	44.934	5.97	8	21
FALSE	High	Master Protein	Q8N684	Cleavage and polyadenylation specificity factor subunit 7 OS=Homo sapiens GN=CPSF7 PE=1 SV=1	0	54.7881	28.4501	11	29	11	1	471	52.018	8	8	21
FALSE	High	Master Protein	P46087	Probable 28S rRNA (cytosine(4447)-C(5))-methyltransferase OS=Homo sapiens GN=NOP2 PE=1 SV=2	0	82.5448	23.0296	19	28	19	1	812	89.247	9.23	8	20
FALSE	High	Master Protein	P19525	Interferon-induced, double-stranded RNA-activated protein kinase OS=Homo sapiens GN=EIF2AK2 PE=1 SV=2	0	73.167	27.2232	15	28	15	1	551	62.056	8.4	8	20
FALSE	High	Master Protein	O00567	Nucleolar protein 56 OS=Homo sapiens GN=NOP56 PE=1 SV=4	0	61.3519	23.7374	15	27	15	1	594	66.009	9.19	8	19
FALSE	High	Master Protein	Q7L576	Cytoplasmic FMR1-interacting protein 1 OS=Homo sapiens GN=CYFIP1 PE=1 SV=1	0	53.6319	11.7318	15	26	15	1	1253	145.089	6.9	8	18
FALSE	High	Master Protein	Q07283	Trichohyalin OS=Homo sapiens GN=TCHH PE=1 SV=2	0.000761905	5.3071	0.411734	3	26	1	1	1943	253.777	5.78	8	18
FALSE	High	Master Protein	P14868	Aspartate--tRNA ligase, cytoplasmic OS=Homo sapiens GN=DARS PE=1 SV=2	0	45.4036	29.5409	14	25	14	1	501	57.1	6.55	8	17
FALSE	High	Master Protein	P50402	Emerin OS=Homo sapiens GN=EMD PE=1 SV=1	0	47.9893	43.3071	9	24	9	1	254	28.976	5.5	8	16
FALSE	High	Master Protein	Q8N5C6	S1 RNA-binding domain-containing protein 1 OS=Homo sapiens GN=SRBD1 PE=1 SV=2	0	40.2435	13.1658	12	22	12	1	995	111.705	8.72	8	14
FALSE	High	Master Protein	O75152	Zinc finger CCCH domain-containing protein 11A OS=Homo sapiens GN=ZC3H11A PE=1 SV=3	0	55.2534	24.1975	17	21	17	1	810	89.076	8.37	8	13
FALSE	High	Master Protein	P10155	60 kDa SS-A/Ro ribonucleoprotein OS=Homo sapiens GN=TROVE2 PE=1 SV=2	0	47.7673	23.4201	12	21	12	1	538	60.631	8.03	8	13
FALSE	High	Master Protein	Q01081	Splicing factor U2AF 35 kDa subunit OS=Homo sapiens GN=U2AF1 PE=1 SV=3	0	46.2726	30	7	21	7	1	240	27.854	8.81	8	13
FALSE	High	Master Protein	Q3KQU3	MAP7 domain-containing protein 1 OS=Homo sapiens GN=MAP7D1 PE=1 SV=1	0	44.5743	13.6742	11	21	10	1	841	92.764	10.11	8	13
FALSE	High	Master Protein	Q9BWM7	Sideroflexin-3 OS=Homo sapiens GN=SFXN3 PE=1 SV=2	0	39.2674	37.2308	10	21	9	1	325	35.956	9.09	8	13
FALSE	High	Master Protein	Q9UKF6	Cleavage and polyadenylation specificity factor subunit 3 OS=Homo sapiens GN=CPSF3 PE=1 SV=1	0	43.1298	18.4211	12	20	12	1	684	77.436	5.6	8	12
FALSE	High	Master Protein	O14980	Exportin-1 OS=Homo sapiens GN=XPO1 PE=1 SV=1	0	39.6974	11.9514	12	20	12	1	1071	123.306	6.06	8	12
FALSE	High	Master Protein	Q92769	Histone deacetylase 2 OS=Homo sapiens GN=HDAC2 PE=1 SV=2	0	35.7617	17.418	8	20	3	1	488	55.329	5.91	8	12
FALSE	High	Master Protein	O43290	U4/U6.U5 tri-snRNP-associated protein 1 OS=Homo sapiens GN=SART1 PE=1 SV=1	0	45.7787	14.75	13	19	13	1	800	90.2	6.13	8	11
FALSE	High	Master Protein	P36542	ATP synthase subunit gamma, mitochondrial OS=Homo sapiens GN=ATP5C1 PE=1 SV=1	0	43.3585	27.1812	8	19	8	1	298	32.975	9.22	8	11
FALSE	High	Master Protein	P52815	39S ribosomal protein L12, mitochondrial OS=Homo sapiens GN=MRPL12 PE=1 SV=2	0	36.869	22.2222	6	19	6	1	198	21.335	8.87	8	11
FALSE	High	Master Protein	Q9BQE9	B-cell CLL/lymphoma 7 protein family member B OS=Homo sapiens GN=BCL7B PE=1 SV=1	0	19.214	20.297	5	19	2	1	202	22.182	4.75	8	11
FALSE	High	Master Protein	Q9Y230	RuvB-like 2 OS=Homo sapiens GN=RUVBL2 PE=1 SV=3	0	38.3498	25.486	10	18	10	1	463	51.125	5.64	8	10
FALSE	High	Master Protein	P20042	Eukaryotic translation initiation factor 2 subunit 2 OS=Homo sapiens GN=EIF2S2 PE=1 SV=2	0	33.8538	21.021	7	18	7	1	333	38.364	5.8	8	10
FALSE	High	Master Protein	Q15532	Protein SSXT OS=Homo sapiens GN=SS18 PE=1 SV=3	0	10.9636	2.87081	2	18	2	1	418	45.899	6.46	8	10
FALSE	High	Master Protein	Q86W50	Methyltransferase-like protein 16 OS=Homo sapiens GN=METTL16 PE=1 SV=2	0	44.2352	20.4626	10	17	10	1	562	63.581	7.85	8	9
FALSE	High	Master Protein	P29372	DNA-3-methyladenine glycosylase OS=Homo sapiens GN=MPG PE=1 SV=3	0	40.0307	39.9329	10	17	10	1	298	32.848	9.57	8	9
FALSE	High	Master Protein	P04083	Annexin A1 OS=Homo sapiens GN=ANXA1 PE=1 SV=2	0	39.1828	30.0578	10	17	10	1	346	38.69	7.02	8	9
FALSE	High	Master Protein	P28074	Proteasome subunit beta type-5 OS=Homo sapiens GN=PSMB5 PE=1 SV=3	0	36.172	26.2357	7	17	7	1	263	28.462	6.92	8	9
FALSE	High	Master Protein	Q12874	Splicing factor 3A subunit 3 OS=Homo sapiens GN=SF3A3 PE=1 SV=1	0	27.4461	16.3673	8	17	8	1	501	58.812	5.38	8	9
FALSE	High	Master Protein	Q9Y4P3	Transducin beta-like protein 2 OS=Homo sapiens GN=TBL2 PE=1 SV=1	0	39.0672	24.3848	11	16	11	1	447	49.766	9.44	8	8
FALSE	High	Master Protein	Q15058	Kinesin-like protein KIF14 OS=Homo sapiens GN=KIF14 PE=1 SV=1	0	35.1449	6.25	11	16	11	1	1648	186.375	7.91	8	8
FALSE	High	Master Protein	Q7L2J0	7SK snRNA methylphosphate capping enzyme OS=Homo sapiens GN=MEPCE PE=1 SV=1	0	33.835	15.2395	8	16	8	1	689	74.31	9.57	8	8
FALSE	High	Master Protein	Q15084	Protein disulfide-isomerase A6 OS=Homo sapiens GN=PDIA6 PE=1 SV=1	0	44.1296	26.8182	8	15	8	1	440	48.091	5.08	8	7
FALSE	High	Master Protein	P35251	Replication factor C subunit 1 OS=Homo sapiens GN=RFC1 PE=1 SV=4	0	36.9868	8.88502	9	15	9	1	1148	128.175	9.36	8	7
FALSE	High	Master Protein	P57088	Transmembrane protein 33 OS=Homo sapiens GN=TMEM33 PE=1 SV=2	0	29.476	17.8138	5	15	5	1	247	27.96	9.7	8	7
FALSE	High	Master Protein	Q15428	Splicing factor 3A subunit 2 OS=Homo sapiens GN=SF3A2 PE=1 SV=2	0	40.1067	18.9655	7	14	7	1	464	49.224	9.64	8	6
FALSE	High	Master Protein	Q9Y297	F-box/WD repeat-containing protein 1A OS=Homo sapiens GN=BTRC PE=1 SV=1	0	32.8297	13.719	9	14	1	1	605	68.822	7.96	8	6
FALSE	High	Master Protein	O00469	Procollagen-lysine,2-oxoglutarate 5-dioxygenase 2 OS=Homo sapiens GN=PLOD2 PE=1 SV=2	0	25.4795	10.0407	8	14	8	1	737	84.632	6.71	8	6
FALSE	High	Master Protein	Q09666	Neuroblast differentiation-associated protein AHNAK OS=Homo sapiens GN=AHNAK PE=1 SV=2	0	27.7871	4.55008	8	12	8	1	5890	628.699	6.15	8	4
FALSE	High	Master Protein	P31939	Bifunctional purine biosynthesis protein PURH OS=Homo sapiens GN=ATIC PE=1 SV=3	0	31.5383	17.2297	7	10	7	1	592	64.575	6.71	8	2
FALSE	High	Master Protein	P18084	Integrin beta-5 OS=Homo sapiens GN=ITGB5 PE=1 SV=1	0	30.8594	12.766	7	10	7	1	799	87.996	6.06	8	2
FALSE	High	Master Protein	Q9HAV7	GrpE protein homolog 1, mitochondrial OS=Homo sapiens GN=GRPEL1 PE=1 SV=2	0	24.1278	25.8065	5	10	5	1	217	24.264	8.12	8	2
FALSE	High	Master Protein	Q00341	Vigilin OS=Homo sapiens GN=HDLBP PE=1 SV=2	0	23.0863	6.46688	8	10	8	1	1268	141.368	6.87	8	2
FALSE	High	Master Protein	Q04446	1,4-alpha-glucan-branching enzyme OS=Homo sapiens GN=GBE1 PE=1 SV=3	0	34.8553	13.6752	7	7	7	1	702	80.423	6.32	7
FALSE	High	Master Protein	P35658	Nuclear pore complex protein Nup214 OS=Homo sapiens GN=NUP214 PE=1 SV=2	0	22.2284	4.30622	7	7	7	1	2090	213.488	7.47	7
FALSE	High	Master Protein	P09972	Fructose-bisphosphate aldolase C OS=Homo sapiens GN=ALDOC PE=1 SV=2	0	20.414	13.4615	4	7	3	1	364	39.431	6.87	7
FALSE	High	Master Protein	Q15438	Cytohesin-1 OS=Homo sapiens GN=CYTH1 PE=1 SV=1	0	207.687	58.0402	30	97	18	1	398	46.383	5.54	7	90
FALSE	High	Master Protein	Q92614	Unconventional myosin-XVIIIa OS=Homo sapiens GN=MYO18A PE=1 SV=3	0	202.399	24.4888	44	56	44	1	2054	232.971	6.3	7	49
FALSE	High	Master Protein	O94973	AP-2 complex subunit alpha-2 OS=Homo sapiens GN=AP2A2 PE=1 SV=2	0	167.307	39.8296	29	46	18	1	939	103.895	6.96	7	39
FALSE	High	Master Protein	Q9NVP1	ATP-dependent RNA helicase DDX18 OS=Homo sapiens GN=DDX18 PE=1 SV=2	0	116.42	32.5373	18	42	18	1	670	75.359	9.5	7	35
FALSE	High	Master Protein	Q14684	Ribosomal RNA processing protein 1 homolog B OS=Homo sapiens GN=RRP1B PE=1 SV=3	0	99.8063	28.3641	23	42	23	1	758	84.375	9.76	7	35
FALSE	High	Master Protein	Q8N3C0	Activating signal cointegrator 1 complex subunit 3 OS=Homo sapiens GN=ASCC3 PE=1 SV=3	0	102.298	13.4877	30	39	30	1	2202	251.301	7.09	7	32
FALSE	High	Master Protein	P46783	40S ribosomal protein S10 OS=Homo sapiens GN=RPS10 PE=1 SV=1	0	69.3361	46.6667	9	36	9	1	165	18.886	10.15	7	29
FALSE	High	Master Protein	Q5JVF3	PCI domain-containing protein 2 OS=Homo sapiens GN=PCID2 PE=1 SV=2	0	100.044	44.3609	19	35	19	1	399	46	8.53	7	28
FALSE	High	Master Protein	Q5SSJ5	Heterochromatin protein 1-binding protein 3 OS=Homo sapiens GN=HP1BP3 PE=1 SV=1	0	87.5083	28.5714	20	33	20	1	553	61.169	9.67	7	26
FALSE	High	Master Protein	Q86V81	THO complex subunit 4 OS=Homo sapiens GN=ALYREF PE=1 SV=3	0	119.726	34.2412	8	31	8	1	257	26.872	11.15	7	24
FALSE	High	Master Protein	P61160	Actin-related protein 2 OS=Homo sapiens GN=ACTR2 PE=1 SV=1	0	77.3647	41.3706	13	31	13	1	394	44.732	6.74	7	24
FALSE	High	Master Protein	O95985	DNA topoisomerase 3-beta-1 OS=Homo sapiens GN=TOP3B PE=1 SV=1	0	60.9541	22.0418	16	29	16	1	862	96.599	8.12	7	22
FALSE	High	Master Protein	P07947	Tyrosine-protein kinase Yes OS=Homo sapiens GN=YES1 PE=1 SV=3	0	56.8644	29.8343	15	27	8	1	543	60.763	6.74	7	20
FALSE	High	Master Protein	P62873	Guanine nucleotide-binding protein G(I)/G(S)/G(T) subunit beta-1 OS=Homo sapiens GN=GNB1 PE=1 SV=3	0	38.6313	18.8235	7	27	2	1	340	37.353	6	7	20
FALSE	High	Master Protein	Q9Y676	28S ribosomal protein S18b, mitochondrial OS=Homo sapiens GN=MRPS18B PE=1 SV=1	0	73.7488	38.7597	10	26	10	1	258	29.377	9.38	7	19
FALSE	High	Master Protein	O43660	Pleiotropic regulator 1 OS=Homo sapiens GN=PLRG1 PE=1 SV=1	0	72.0129	30.5447	13	26	13	1	514	57.158	9.17	7	19
FALSE	High	Master Protein	Q9NRX1	RNA-binding protein PNO1 OS=Homo sapiens GN=PNO1 PE=1 SV=1	0	61.2957	48.8095	10	26	9	1	252	27.907	9.73	7	19
FALSE	High	Master Protein	Q6P1J9	Parafibromin OS=Homo sapiens GN=CDC73 PE=1 SV=1	0	57.586	27.6836	13	24	13	1	531	60.539	9.61	7	17
FALSE	High	Master Protein	Q53F19	Uncharacterized protein C17orf85 OS=Homo sapiens GN=C17orf85 PE=1 SV=2	0	53.9354	18.871	13	24	13	1	620	70.549	5.73	7	17
FALSE	High	Master Protein	Q9BQ67	Glutamate-rich WD repeat-containing protein 1 OS=Homo sapiens GN=GRWD1 PE=1 SV=1	0	68.2986	32.0628	11	22	11	1	446	49.388	4.92	7	15
FALSE	High	Master Protein	Q8WWY3	U4/U6 small nuclear ribonucleoprotein Prp31 OS=Homo sapiens GN=PRPF31 PE=1 SV=2	0	57.0083	27.2545	12	22	12	1	499	55.421	5.78	7	15
FALSE	High	Master Protein	Q14651	Plastin-1 OS=Homo sapiens GN=PLS1 PE=1 SV=2	0	66.7011	21.4626	10	21	6	1	629	70.209	5.41	7	14
FALSE	High	Master Protein	Q96T88	E3 ubiquitin-protein ligase UHRF1 OS=Homo sapiens GN=UHRF1 PE=1 SV=1	0	56.6931	14.628	12	20	12	1	793	89.757	7.56	7	13
FALSE	High	Master Protein	O43809	Cleavage and polyadenylation specificity factor subunit 5 OS=Homo sapiens GN=NUDT21 PE=1 SV=1	0	51.1065	34.3612	9	20	9	1	227	26.211	8.82	7	13
FALSE	High	Master Protein	O00231	26S proteasome non-ATPase regulatory subunit 11 OS=Homo sapiens GN=PSMD11 PE=1 SV=3	0	46.9917	27.0142	11	20	11	1	422	47.434	6.48	7	13
FALSE	High	Master Protein	A4D1E9	GTP-binding protein 10 OS=Homo sapiens GN=GTPBP10 PE=1 SV=1	0	38.0913	26.0982	10	20	10	1	387	42.906	9.03	7	13
FALSE	High	Master Protein	Q9BXS6	Nucleolar and spindle-associated protein 1 OS=Homo sapiens GN=NUSAP1 PE=1 SV=1	0	28.0218	19.9546	8	20	8	1	441	49.422	9.91	7	13
FALSE	High	Master Protein	Q9BVJ6	U3 small nucleolar RNA-associated protein 14 homolog A OS=Homo sapiens GN=UTP14A PE=1 SV=1	0	52.7892	21.2711	14	19	14	1	771	87.924	7.87	7	12
FALSE	High	Master Protein	Q32P28	Prolyl 3-hydroxylase 1 OS=Homo sapiens GN=P3H1 PE=1 SV=2	0	39.0758	15.7609	11	19	11	1	736	83.341	5.14	7	12
FALSE	High	Master Protein	Q12849	G-rich sequence factor 1 OS=Homo sapiens GN=GRSF1 PE=1 SV=3	0	38.0789	18.9583	9	19	9	1	480	53.093	6.19	7	12
FALSE	High	Master Protein	O15143	Actin-related protein 2/3 complex subunit 1B OS=Homo sapiens GN=ARPC1B PE=1 SV=3	0	36.7996	23.6559	9	19	9	1	372	40.923	8.35	7	12
FALSE	High	Master Protein	Q9ULX3	RNA-binding protein NOB1 OS=Homo sapiens GN=NOB1 PE=1 SV=1	0	34.317	22.0874	10	19	10	1	412	46.646	7.18	7	12
FALSE	High	Master Protein	Q9Y2A7	Nck-associated protein 1 OS=Homo sapiens GN=NCKAP1 PE=1 SV=1	0	42.0428	10.461	13	18	13	1	1128	128.707	6.62	7	11
FALSE	High	Master Protein	P78406	mRNA export factor OS=Homo sapiens GN=RAE1 PE=1 SV=1	0	41.4433	22.2826	7	18	7	1	368	40.942	7.83	7	11
FALSE	High	Master Protein	P31689	DnaJ homolog subfamily A member 1 OS=Homo sapiens GN=DNAJA1 PE=1 SV=2	0	40.1895	24.937	7	18	7	1	397	44.839	7.08	7	11
FALSE	High	Master Protein	P12268	Inosine-5'-monophosphate dehydrogenase 2 OS=Homo sapiens GN=IMPDH2 PE=1 SV=2	0	37.7548	19.6498	8	18	7	1	514	55.77	6.9	7	11
FALSE	High	Master Protein	Q16658	Fascin OS=Homo sapiens GN=FSCN1 PE=1 SV=3	0	46.4429	21.0953	9	17	9	1	493	54.496	7.24	7	10
FALSE	High	Master Protein	O95757	Heat shock 70 kDa protein 4L OS=Homo sapiens GN=HSPA4L PE=1 SV=3	0	40.6742	15.4946	12	17	10	1	839	94.453	5.88	7	10
FALSE	High	Master Protein	Q9BQ04	RNA-binding protein 4B OS=Homo sapiens GN=RBM4B PE=1 SV=1	0	26.5207	24.234	8	17	2	1	359	40.124	6.74	7	10
FALSE	High	Master Protein	O75400	Pre-mRNA-processing factor 40 homolog A OS=Homo sapiens GN=PRPF40A PE=1 SV=2	0	40.5908	10.4493	10	16	10	1	957	108.737	7.56	7	9
FALSE	High	Master Protein	Q5T9A4	ATPase family AAA domain-containing protein 3B OS=Homo sapiens GN=ATAD3B PE=1 SV=1	0	34.9657	16.358	10	16	3	1	648	72.527	9.2	7	9
FALSE	High	Master Protein	P50454	Serpin H1 OS=Homo sapiens GN=SERPINH1 PE=1 SV=2	0	44.2668	21.0526	7	15	7	1	418	46.411	8.69	7	8
FALSE	High	Master Protein	P33993	DNA replication licensing factor MCM7 OS=Homo sapiens GN=MCM7 PE=1 SV=4	0	43.5884	18.0807	11	15	11	1	719	81.257	6.46	7	8
FALSE	High	Master Protein	Q13347	Eukaryotic translation initiation factor 3 subunit I OS=Homo sapiens GN=EIF3I PE=1 SV=1	0	43.1966	22.1538	6	15	6	1	325	36.479	5.64	7	8
FALSE	High	Master Protein	O95373	Importin-7 OS=Homo sapiens GN=IPO7 PE=1 SV=1	0	37.2045	9.73025	8	15	8	1	1038	119.44	4.82	7	8
FALSE	High	Master Protein	Q12986	Transcriptional repressor NF-X1 OS=Homo sapiens GN=NFX1 PE=1 SV=2	0	31.49	8.30357	10	15	10	1	1120	124.312	8.24	7	8
FALSE	High	Master Protein	Q8WXF1	Paraspeckle component 1 OS=Homo sapiens GN=PSPC1 PE=1 SV=1	0	45.8422	19.8853	8	14	7	1	523	58.706	6.67	7	7
FALSE	High	Master Protein	P60900	Proteasome subunit alpha type-6 OS=Homo sapiens GN=PSMA6 PE=1 SV=1	0	28.6596	21.9512	5	14	5	1	246	27.382	6.76	7	7
FALSE	High	Master Protein	Q8NF37	Lysophosphatidylcholine acyltransferase 1 OS=Homo sapiens GN=LPCAT1 PE=1 SV=2	0	25.9854	14.2322	8	14	8	1	534	59.113	6.02	7	7
FALSE	High	Master Protein	Q8NBS9	Thioredoxin domain-containing protein 5 OS=Homo sapiens GN=TXNDC5 PE=1 SV=2	0	25.0578	15.9722	7	14	7	1	432	47.599	5.97	7	7
FALSE	High	Master Protein	Q8N983	39S ribosomal protein L43, mitochondrial OS=Homo sapiens GN=MRPL43 PE=1 SV=1	0	24.2947	30.6977	7	14	7	1	215	23.416	8.65	7	7
FALSE	High	Master Protein	P50416	Carnitine O-palmitoyltransferase 1, liver isoform OS=Homo sapiens GN=CPT1A PE=1 SV=2	0	22.98	9.05563	6	14	6	1	773	88.311	8.65	7	7
FALSE	High	Master Protein	O43896	Kinesin-like protein KIF1C OS=Homo sapiens GN=KIF1C PE=1 SV=3	0	22.2205	8.0689	9	14	7	1	1103	122.87	6.9	7	7
FALSE	High	Master Protein	Q13423	NAD(P) transhydrogenase, mitochondrial OS=Homo sapiens GN=NNT PE=1 SV=3	0	9.12348	1.84162	2	14	2	1	1086	113.823	8.09	7	7
FALSE	High	Master Protein	Q7L2H7	Eukaryotic translation initiation factor 3 subunit M OS=Homo sapiens GN=EIF3M PE=1 SV=1	0	38.6317	25.6684	9	13	9	1	374	42.476	5.63	7	6
FALSE	High	Master Protein	Q8WUZ0	B-cell CLL/lymphoma 7 protein family member C OS=Homo sapiens GN=BCL7C PE=1 SV=3	0	33.0734	24.8848	7	13	6	1	217	23.454	5.2	7	6
FALSE	High	Master Protein	Q9NRF8	CTP synthase 2 OS=Homo sapiens GN=CTPS2 PE=1 SV=1	0	31.3638	10.0683	6	13	4	1	586	65.636	6.9	7	6
FALSE	High	Master Protein	Q02880	DNA topoisomerase 2-beta OS=Homo sapiens GN=TOP2B PE=1 SV=3	0	31.0352	6.70357	11	13	9	1	1626	183.152	8	7	6
FALSE	High	Master Protein	P19388	DNA-directed RNA polymerases I, II, and III subunit RPABC1 OS=Homo sapiens GN=POLR2E PE=1 SV=4	0	25.8912	24.2857	5	13	5	1	210	24.536	5.95	7	6
FALSE	High	Master Protein	O60524	Nuclear export mediator factor NEMF OS=Homo sapiens GN=NEMF PE=1 SV=4	0	23.4006	8.17844	8	13	8	1	1076	122.878	6.35	7	6
FALSE	High	Master Protein	P15170	Eukaryotic peptide chain release factor GTP-binding subunit ERF3A OS=Homo sapiens GN=GSPT1 PE=1 SV=1	0	22.4989	11.8236	6	13	6	1	499	55.72	5.62	7	6
FALSE	High	Master Protein	P15121	Aldose reductase OS=Homo sapiens GN=AKR1B1 PE=1 SV=3	0	19.031	16.4557	6	13	5	1	316	35.83	6.98	7	6
FALSE	High	Master Protein	Q9H6T0	Epithelial splicing regulatory protein 2 OS=Homo sapiens GN=ESRP2 PE=1 SV=1	0	30.752	15.2682	9	12	9	1	727	78.351	6.71	7	5
FALSE	High	Master Protein	Q9UPY3	Endoribonuclease Dicer OS=Homo sapiens GN=DICER1 PE=1 SV=3	0	25.2549	4.37045	8	12	8	1	1922	218.542	5.68	7	5
FALSE	High	Master Protein	P04844	Dolichyl-diphosphooligosaccharide--protein glycosyltransferase subunit 2 OS=Homo sapiens GN=RPN2 PE=1 SV=3	0	48.2889	20.7607	8	11	8	1	631	69.241	5.69	7	4
FALSE	High	Master Protein	Q96GC5	39S ribosomal protein L48, mitochondrial OS=Homo sapiens GN=MRPL48 PE=1 SV=2	0	37.4579	16.9811	3	11	3	1	212	23.92	8.98	7	4
FALSE	High	Master Protein	Q9NV06	DDB1- and CUL4-associated factor 13 OS=Homo sapiens GN=DCAF13 PE=1 SV=2	0	23.5161	16.6292	7	11	7	1	445	51.369	9.19	7	4
FALSE	High	Master Protein	O43865	Adenosylhomocysteinase 2 OS=Homo sapiens GN=AHCYL1 PE=1 SV=2	0	19.5524	9.62264	6	11	4	1	530	58.913	6.89	7	4
FALSE	High	Master Protein	P17174	Aspartate aminotransferase, cytoplasmic OS=Homo sapiens GN=GOT1 PE=1 SV=3	0	17.3644	17.1913	6	11	6	1	413	46.219	7.01	7	4
FALSE	High	Master Protein	Q5JSZ5	Protein PRRC2B OS=Homo sapiens GN=PRRC2B PE=1 SV=2	0	38.1623	6.23598	8	10	8	1	2229	242.817	8.34	7	3
FALSE	High	Master Protein	O94906	Pre-mRNA-processing factor 6 OS=Homo sapiens GN=PRPF6 PE=1 SV=1	0	28.4298	9.45802	8	10	8	1	941	106.858	8.25	7	3
FALSE	High	Master Protein	P48444	Coatomer subunit delta OS=Homo sapiens GN=ARCN1 PE=1 SV=1	0	24.9652	16.4384	8	10	8	1	511	57.174	6.21	7	3
FALSE	High	Master Protein	Q9BYN8	28S ribosomal protein S26, mitochondrial OS=Homo sapiens GN=MRPS26 PE=1 SV=1	0	22.5782	31.2195	7	10	7	1	205	24.197	10.39	7	3
FALSE	High	Master Protein	Q9HD33	39S ribosomal protein L47, mitochondrial OS=Homo sapiens GN=MRPL47 PE=1 SV=2	0	20.2687	18.8	5	10	5	1	250	29.432	10.37	7	3
FALSE	High	Master Protein	P39656	Dolichyl-diphosphooligosaccharide--protein glycosyltransferase 48 kDa subunit OS=Homo sapiens GN=DDOST PE=1 SV=4	0	17.8186	12.2807	6	10	6	1	456	50.769	6.55	7	3
FALSE	High	Master Protein	Q14683	Structural maintenance of chromosomes protein 1A OS=Homo sapiens GN=SMC1A PE=1 SV=2	0	16.0037	4.70397	7	10	7	1	1233	143.144	7.64	7	3
FALSE	High	Master Protein	P27694	Replication protein A 70 kDa DNA-binding subunit OS=Homo sapiens GN=RPA1 PE=1 SV=2	0	41.2392	16.0714	7	8	7	1	616	68.095	7.21	7	1
FALSE	High	Master Protein	Q12873	Chromodomain-helicase-DNA-binding protein 3 OS=Homo sapiens GN=CHD3 PE=1 SV=3	0	18.7217	3.05	6	8	3	1	2000	226.45	7.3	7	1
FALSE	High	Master Protein	Q9H307	Pinin OS=Homo sapiens GN=PNN PE=1 SV=4	0	18.2036	8.92608	6	8	6	1	717	81.565	7.14	7	1
FALSE	High	Master Protein	Q7Z333	Probable helicase senataxin OS=Homo sapiens GN=SETX PE=1 SV=4	0	18.0053	2.35338	6	6	6	1	2677	302.689	7.17	6
FALSE	High	Master Protein	P12270	Nucleoprotein TPR OS=Homo sapiens GN=TPR PE=1 SV=3	0	14.0766	1.90436	5	6	5	1	2363	267.131	5.02	6
FALSE	High	Master Protein	Q05682	Caldesmon OS=Homo sapiens GN=CALD1 PE=1 SV=3	0	124.51	22.5725	20	50	20	1	793	93.175	5.66	6	44
FALSE	High	Master Protein	P47755	F-actin-capping protein subunit alpha-2 OS=Homo sapiens GN=CAPZA2 PE=1 SV=3	0	99.0129	63.986	14	38	10	1	286	32.929	5.85	6	32
FALSE	High	Master Protein	Q8TDN6	Ribosome biogenesis protein BRX1 homolog OS=Homo sapiens GN=BRIX1 PE=1 SV=2	0	73.7865	45.8924	13	36	13	1	353	41.375	9.92	6	30
FALSE	High	Master Protein	P27105	Erythrocyte band 7 integral membrane protein OS=Homo sapiens GN=STOM PE=1 SV=3	0	108.772	59.375	15	35	15	1	288	31.711	7.88	6	29
FALSE	High	Master Protein	Q5M775	Cytospin-B OS=Homo sapiens GN=SPECC1 PE=1 SV=1	0	88.778	23.3146	21	31	20	1	1068	118.512	6.7	6	25
FALSE	High	Master Protein	Q9UPQ0	LIM and calponin homology domains-containing protein 1 OS=Homo sapiens GN=LIMCH1 PE=1 SV=4	0	54.6957	16.3435	15	29	15	1	1083	121.792	6.47	6	23
FALSE	High	Master Protein	P04899	Guanine nucleotide-binding protein G(i) subunit alpha-2 OS=Homo sapiens GN=GNAI2 PE=1 SV=3	0	55.1554	29.0141	10	27	4	1	355	40.425	5.54	6	21
FALSE	High	Master Protein	Q9NYV4	Cyclin-dependent kinase 12 OS=Homo sapiens GN=CDK12 PE=1 SV=2	0	76.0486	14.3624	16	25	12	1	1490	164.054	9.44	6	19
FALSE	High	Master Protein	Q99848	Probable rRNA-processing protein EBP2 OS=Homo sapiens GN=EBNA1BP2 PE=1 SV=2	0	64.0645	38.2353	12	24	12	1	306	34.83	10.1	6	18
FALSE	High	Master Protein	Q4G0J3	La-related protein 7 OS=Homo sapiens GN=LARP7 PE=1 SV=1	0	53.006	24.2268	14	24	14	1	582	66.857	9.55	6	18
FALSE	High	Master Protein	P46779	60S ribosomal protein L28 OS=Homo sapiens GN=RPL28 PE=1 SV=3	0	42.8739	39.4161	11	24	11	1	137	15.738	12.02	6	18
FALSE	High	Master Protein	O75718	Cartilage-associated protein OS=Homo sapiens GN=CRTAP PE=1 SV=1	0	38.8595	21.9451	11	24	11	1	401	46.532	5.73	6	18
FALSE	Medium	Master Protein	Q96HP4	Oxidoreductase NAD-binding domain-containing protein 1 OS=Homo sapiens GN=OXNAD1 PE=1 SV=1	0.0216968	1.89211	2.24359	1	24	1	1	312	34.832	8.37	6	18
FALSE	High	Master Protein	Q12857	Nuclear factor 1 A-type OS=Homo sapiens GN=NFIA PE=1 SV=2	0	27.4423	16.8959	9	23	5	1	509	55.909	8.44	6	17
FALSE	High	Master Protein	Q96MU7	YTH domain-containing protein 1 OS=Homo sapiens GN=YTHDC1 PE=1 SV=3	0	42.0414	13.205	13	22	13	1	727	84.649	6.23	6	16
FALSE	High	Master Protein	Q9P2I0	Cleavage and polyadenylation specificity factor subunit 2 OS=Homo sapiens GN=CPSF2 PE=1 SV=2	0	62.3689	20.9719	13	21	13	1	782	88.431	5.11	6	15
FALSE	High	Master Protein	Q16630	Cleavage and polyadenylation specificity factor subunit 6 OS=Homo sapiens GN=CPSF6 PE=1 SV=2	0	59.083	20.6897	8	21	8	1	551	59.173	7.15	6	15
FALSE	High	Master Protein	Q99959	Plakophilin-2 OS=Homo sapiens GN=PKP2 PE=1 SV=2	0	49.9375	13.2804	11	21	11	1	881	97.355	9.33	6	15
FALSE	High	Master Protein	Q14562	ATP-dependent RNA helicase DHX8 OS=Homo sapiens GN=DHX8 PE=1 SV=1	0	43.417	10.9016	12	21	11	1	1220	139.227	8.32	6	15
FALSE	High	Master Protein	O00712	Nuclear factor 1 B-type OS=Homo sapiens GN=NFIB PE=1 SV=2	0	24.4484	15.7143	6	21	3	1	420	47.412	8.87	6	15
FALSE	High	Master Protein	P08758	Annexin A5 OS=Homo sapiens GN=ANXA5 PE=1 SV=2	0	57.0563	37.5	11	20	11	1	320	35.914	5.05	6	14
FALSE	High	Master Protein	Q9UKS6	Protein kinase C and casein kinase substrate in neurons protein 3 OS=Homo sapiens GN=PACSIN3 PE=1 SV=2	0	54.5054	28.7736	10	20	10	1	424	48.457	6.18	6	14
FALSE	High	Master Protein	Q9Y2X3	Nucleolar protein 58 OS=Homo sapiens GN=NOP58 PE=1 SV=1	0	94.3203	27.0321	10	19	10	1	529	59.541	8.92	6	13
FALSE	High	Master Protein	Q9UHD8	Septin-9 OS=Homo sapiens GN=SEPT9 PE=1 SV=2	0	60.3803	23.2082	12	19	12	1	586	65.361	8.97	6	13
FALSE	High	Master Protein	O43242	26S proteasome non-ATPase regulatory subunit 3 OS=Homo sapiens GN=PSMD3 PE=1 SV=2	0	58.643	25.2809	13	19	13	1	534	60.939	8.44	6	13
FALSE	High	Master Protein	Q96GA3	Protein LTV1 homolog OS=Homo sapiens GN=LTV1 PE=1 SV=1	0	56.8575	16.4211	7	19	7	1	475	54.821	4.91	6	13
FALSE	High	Master Protein	P28300	Protein-lysine 6-oxidase OS=Homo sapiens GN=LOX PE=1 SV=2	0	28.7042	21.1031	7	19	7	1	417	46.915	8.09	6	13
FALSE	High	Master Protein	Q9H936	Mitochondrial glutamate carrier 1 OS=Homo sapiens GN=SLC25A22 PE=1 SV=1	0	44.3547	37.4613	10	18	10	1	323	34.448	9.29	6	12
FALSE	High	Master Protein	P53597	Succinyl-CoA ligase [ADP/GDP-forming] subunit alpha, mitochondrial OS=Homo sapiens GN=SUCLG1 PE=1 SV=4	0	12.1393	6.06936	2	18	2	1	346	36.227	8.79	6	12
FALSE	High	Master Protein	Q9Y265	RuvB-like 1 OS=Homo sapiens GN=RUVBL1 PE=1 SV=1	0	48.5576	25.8772	9	17	9	1	456	50.196	6.42	6	11
FALSE	High	Master Protein	Q8WYQ5	Microprocessor complex subunit DGCR8 OS=Homo sapiens GN=DGCR8 PE=1 SV=1	0	44.8527	15.5239	12	17	12	1	773	85.991	5.95	6	11
FALSE	High	Master Protein	Q14978	Nucleolar and coiled-body phosphoprotein 1 OS=Homo sapiens GN=NOLC1 PE=1 SV=2	0	35.557	17.4535	12	17	12	1	699	73.56	9.47	6	11
FALSE	High	Master Protein	Q14847	LIM and SH3 domain protein 1 OS=Homo sapiens GN=LASP1 PE=1 SV=2	0	29.999	23.3716	6	17	6	1	261	29.698	7.05	6	11
FALSE	High	Master Protein	O43251	RNA binding protein fox-1 homolog 2 OS=Homo sapiens GN=RBFOX2 PE=1 SV=3	0	23.7132	15.3846	8	17	8	1	390	41.348	7.27	6	11
FALSE	High	Master Protein	Q4VC05	B-cell CLL/lymphoma 7 protein family member A OS=Homo sapiens GN=BCL7A PE=1 SV=1	0	15.2206	12.381	4	17	1	1	210	22.796	5.14	6	11
FALSE	High	Master Protein	Q9H0U9	Testis-specific Y-encoded-like protein 1 OS=Homo sapiens GN=TSPYL1 PE=1 SV=3	0	50.9755	25.4005	8	16	8	1	437	49.162	5.45	6	10
FALSE	High	Master Protein	P40939	Trifunctional enzyme subunit alpha, mitochondrial OS=Homo sapiens GN=HADHA PE=1 SV=2	0	47.3143	18.4797	11	16	11	1	763	82.947	9.04	6	10
FALSE	High	Master Protein	Q14669	E3 ubiquitin-protein ligase TRIP12 OS=Homo sapiens GN=TRIP12 PE=1 SV=1	0	39.9964	6.72691	11	16	11	1	1992	220.296	8.48	6	10
FALSE	High	Master Protein	P25786	Proteasome subunit alpha type-1 OS=Homo sapiens GN=PSMA1 PE=1 SV=1	0	34.4665	24.7148	7	16	7	1	263	29.537	6.61	6	10
FALSE	High	Master Protein	Q09028	Histone-binding protein RBBP4 OS=Homo sapiens GN=RBBP4 PE=1 SV=3	0	33.2446	14.1176	8	16	1	1	425	47.626	4.89	6	10
FALSE	High	Master Protein	Q9Y2Q9	28S ribosomal protein S28, mitochondrial OS=Homo sapiens GN=MRPS28 PE=1 SV=1	0	33.2326	29.4118	6	16	6	1	187	20.83	9.1	6	10
FALSE	High	Master Protein	Q16576	Histone-binding protein RBBP7 OS=Homo sapiens GN=RBBP7 PE=1 SV=1	0	32.9312	14.1176	8	16	1	1	425	47.79	5.05	6	10
FALSE	High	Master Protein	Q9NVI7	ATPase family AAA domain-containing protein 3A OS=Homo sapiens GN=ATAD3A PE=1 SV=2	0	32.0806	14.0379	9	16	2	1	634	71.325	8.98	6	10
FALSE	High	Master Protein	O75475	PC4 and SFRS1-interacting protein OS=Homo sapiens GN=PSIP1 PE=1 SV=1	0	28.7318	12.4528	6	16	6	1	530	60.067	9.13	6	10
FALSE	High	Master Protein	P82930	28S ribosomal protein S34, mitochondrial OS=Homo sapiens GN=MRPS34 PE=1 SV=2	0	17.757	26.1468	7	16	7	1	218	25.634	9.98	6	10
FALSE	High	Master Protein	Q6IN84	rRNA methyltransferase 1, mitochondrial OS=Homo sapiens GN=MRM1 PE=1 SV=1	0	20.9416	14.7309	6	15	6	1	353	38.614	7.94	6	9
FALSE	High	Master Protein	P22234	Multifunctional protein ADE2 OS=Homo sapiens GN=PAICS PE=1 SV=3	0	45.0488	20.4706	9	14	9	1	425	47.049	7.23	6	8
FALSE	High	Master Protein	P60891	Ribose-phosphate pyrophosphokinase 1 OS=Homo sapiens GN=PRPS1 PE=1 SV=2	0	41.9763	25.4717	7	14	4	1	318	34.812	6.98	6	8
FALSE	High	Master Protein	P36776	Lon protease homolog, mitochondrial OS=Homo sapiens GN=LONP1 PE=1 SV=2	0	41.2769	12.3045	12	14	12	1	959	106.422	6.39	6	8
FALSE	High	Master Protein	P82663	28S ribosomal protein S25, mitochondrial OS=Homo sapiens GN=MRPS25 PE=1 SV=1	0	41.2749	43.9306	7	14	7	1	173	20.103	8.82	6	8
FALSE	High	Master Protein	Q9BVS4	Serine/threonine-protein kinase RIO2 OS=Homo sapiens GN=RIOK2 PE=1 SV=2	0	39.0617	19.9275	8	14	8	1	552	63.243	5.94	6	8
FALSE	High	Master Protein	P53618	Coatomer subunit beta OS=Homo sapiens GN=COPB1 PE=1 SV=3	0	38.2031	14.3757	10	14	10	1	953	107.074	6.05	6	8
FALSE	High	Master Protein	Q9H5Q4	Dimethyladenosine transferase 2, mitochondrial OS=Homo sapiens GN=TFB2M PE=1 SV=1	0	32.536	21.7172	9	14	9	1	396	45.32	9.19	6	8
FALSE	High	Master Protein	Q9H967	WD repeat-containing protein 76 OS=Homo sapiens GN=WDR76 PE=1 SV=2	0	28.6814	15.4952	9	14	9	1	626	69.725	9.25	6	8
FALSE	High	Master Protein	Q96QR8	Transcriptional activator protein Pur-beta OS=Homo sapiens GN=PURB PE=1 SV=3	0	33.2022	30.1282	7	13	5	1	312	33.22	5.43	6	7
FALSE	High	Master Protein	P33176	Kinesin-1 heavy chain OS=Homo sapiens GN=KIF5B PE=1 SV=1	0	29.9981	8.6189	8	13	8	1	963	109.617	6.51	6	7
FALSE	High	Master Protein	P34897	Serine hydroxymethyltransferase, mitochondrial OS=Homo sapiens GN=SHMT2 PE=1 SV=3	0	29.8559	17.0635	8	13	8	1	504	55.958	8.53	6	7
FALSE	High	Master Protein	Q9UG63	ATP-binding cassette sub-family F member 2 OS=Homo sapiens GN=ABCF2 PE=1 SV=2	0	29.0948	13.0016	7	13	7	1	623	71.245	7.37	6	7
FALSE	High	Master Protein	Q8IWS0	PHD finger protein 6 OS=Homo sapiens GN=PHF6 PE=1 SV=1	0	18.5885	12.8767	6	13	6	1	365	41.264	8.68	6	7
FALSE	High	Master Protein	Q96HU8	GTP-binding protein Di-Ras2 OS=Homo sapiens GN=DIRAS2 PE=1 SV=1	0.00239808	3.99439	5.52764	1	13	1	1	199	22.471	8.76	6	7
FALSE	High	Master Protein	O00303	Eukaryotic translation initiation factor 3 subunit F OS=Homo sapiens GN=EIF3F PE=1 SV=1	0	37.0495	17.6471	5	12	5	1	357	37.54	5.45	6	6
FALSE	High	Master Protein	P17980	26S protease regulatory subunit 6A OS=Homo sapiens GN=PSMC3 PE=1 SV=3	0	34.2386	20.9567	7	12	7	1	439	49.172	5.24	6	6
FALSE	High	Master Protein	P61619	Protein transport protein Sec61 subunit alpha isoform 1 OS=Homo sapiens GN=SEC61A1 PE=1 SV=2	0	18.7517	10.5042	6	12	6	1	476	52.231	8.06	6	6
FALSE	High	Master Protein	Q8IZ69	tRNA (uracil-5-)-methyltransferase homolog A OS=Homo sapiens GN=TRMT2A PE=1 SV=2	0	18.3595	10.24	6	12	6	1	625	68.682	7.94	6	6
FALSE	High	Master Protein	Q96PM9	Zinc finger protein 385A OS=Homo sapiens GN=ZNF385A PE=1 SV=2	0	14.0051	12.6943	4	12	4	1	386	40.428	9.86	6	6
FALSE	High	Master Protein	P35998	26S protease regulatory subunit 7 OS=Homo sapiens GN=PSMC2 PE=1 SV=3	0	33.0564	17.552	8	11	8	1	433	48.603	5.95	6	5
FALSE	High	Master Protein	P09234	U1 small nuclear ribonucleoprotein C OS=Homo sapiens GN=SNRPC PE=1 SV=1	0	30.613	25.1572	4	11	4	1	159	17.381	9.67	6	5
FALSE	High	Master Protein	P46060	Ran GTPase-activating protein 1 OS=Homo sapiens GN=RANGAP1 PE=1 SV=1	0	29.4441	14.9915	8	11	8	1	587	63.502	4.68	6	5
FALSE	High	Master Protein	Q14739	Lamin-B receptor OS=Homo sapiens GN=LBR PE=1 SV=2	0	29.3266	11.7073	7	11	7	1	615	70.658	9.36	6	5
FALSE	High	Master Protein	P43686	26S protease regulatory subunit 6B OS=Homo sapiens GN=PSMC4 PE=1 SV=2	0	27.3431	19.378	8	11	8	1	418	47.337	5.21	6	5
FALSE	High	Master Protein	P37837	Transaldolase OS=Homo sapiens GN=TALDO1 PE=1 SV=2	0	24.7373	21.9585	7	11	7	1	337	37.516	6.81	6	5
FALSE	High	Master Protein	Q15942	Zyxin OS=Homo sapiens GN=ZYX PE=1 SV=1	0	22.681	14.3357	6	11	6	1	572	61.238	6.67	6	5
FALSE	High	Master Protein	Q01650	Large neutral amino acids transporter small subunit 1 OS=Homo sapiens GN=SLC7A5 PE=1 SV=2	0	20.7422	9.86193	4	11	4	1	507	54.974	7.72	6	5
FALSE	High	Master Protein	P62820	Ras-related protein Rab-1A OS=Homo sapiens GN=RAB1A PE=1 SV=3	0	18.782	26.3415	5	11	3	1	205	22.663	6.21	6	5
FALSE	High	Master Protein	P35613	Basigin OS=Homo sapiens GN=BSG PE=1 SV=2	0	18.5127	12.2078	4	11	4	1	385	42.174	5.66	6	5
FALSE	High	Master Protein	O95817	BAG family molecular chaperone regulator 3 OS=Homo sapiens GN=BAG3 PE=1 SV=3	0	16.4893	8.69565	5	11	5	1	575	61.557	6.95	6	5
FALSE	High	Master Protein	P23588	Eukaryotic translation initiation factor 4B OS=Homo sapiens GN=EIF4B PE=1 SV=2	0	16.0129	7.20131	4	11	4	1	611	69.11	5.73	6	5
FALSE	High	Master Protein	Q14576	ELAV-like protein 3 OS=Homo sapiens GN=ELAVL3 PE=2 SV=3	0	14.311	14.4414	5	11	1	1	367	39.522	9.28	6	5
FALSE	High	Master Protein	Q15165	Serum paraoxonase/arylesterase 2 OS=Homo sapiens GN=PON2 PE=1 SV=3	0	14.1905	7.06215	2	11	2	1	354	39.372	5.6	6	5
FALSE	High	Master Protein	P28482	Mitogen-activated protein kinase 1 OS=Homo sapiens GN=MAPK1 PE=1 SV=3	0	12.216	16.1111	6	11	5	1	360	41.363	6.98	6	5
FALSE	High	Master Protein	P23921	Ribonucleoside-diphosphate reductase large subunit OS=Homo sapiens GN=RRM1 PE=1 SV=1	0	32.5298	11.3636	8	10	8	1	792	90.013	7.15	6	4
FALSE	High	Master Protein	P61019	Ras-related protein Rab-2A OS=Homo sapiens GN=RAB2A PE=1 SV=1	0	32.1873	34.9057	6	10	6	1	212	23.531	6.54	6	4
FALSE	High	Master Protein	P27824	Calnexin OS=Homo sapiens GN=CANX PE=1 SV=2	0	29.4412	7.93919	5	10	5	1	592	67.526	4.6	6	4
FALSE	High	Master Protein	O95573	Long-chain-fatty-acid--CoA ligase 3 OS=Homo sapiens GN=ACSL3 PE=1 SV=3	0	28.2609	11.9444	6	10	4	1	720	80.368	8.38	6	4
FALSE	High	Master Protein	O75390	Citrate synthase, mitochondrial OS=Homo sapiens GN=CS PE=1 SV=2	0	25.3574	13.9485	6	10	6	1	466	51.68	8.32	6	4
FALSE	High	Master Protein	P11586	C-1-tetrahydrofolate synthase, cytoplasmic OS=Homo sapiens GN=MTHFD1 PE=1 SV=3	0	24.4237	8.12834	7	10	7	1	935	101.495	7.3	6	4
FALSE	High	Master Protein	P18085	ADP-ribosylation factor 4 OS=Homo sapiens GN=ARF4 PE=1 SV=3	0	18.9674	21.1111	4	10	3	1	180	20.498	7.14	6	4
FALSE	High	Master Protein	Q14566	DNA replication licensing factor MCM6 OS=Homo sapiens GN=MCM6 PE=1 SV=1	0	16.725	5.48112	5	10	5	1	821	92.831	5.41	6	4
FALSE	High	Master Protein	P61026	Ras-related protein Rab-10 OS=Homo sapiens GN=RAB10 PE=1 SV=1	0	11.5984	19.5	4	10	1	1	200	22.527	8.38	6	4
FALSE	High	Master Protein	Q9UJK0	Ribosome biogenesis protein TSR3 homolog OS=Homo sapiens GN=TSR3 PE=1 SV=1	0	11.4304	14.1026	4	10	4	1	312	33.575	6.87	6	4
FALSE	High	Master Protein	Q9NQH7	Probable Xaa-Pro aminopeptidase 3 OS=Homo sapiens GN=XPNPEP3 PE=1 SV=1	0.00571973	3.32071	2.95858	2	10	1	1	507	56.997	6.83	6	4
FALSE	High	Master Protein	P30154	Serine/threonine-protein phosphatase 2A 65 kDa regulatory subunit A beta isoform OS=Homo sapiens GN=PPP2R1B PE=1 SV=3	0	46.7339	7.65391	5	9	1	1	601	66.171	4.94	6	3
FALSE	High	Master Protein	Q99714	3-hydroxyacyl-CoA dehydrogenase type-2 OS=Homo sapiens GN=HSD17B10 PE=1 SV=3	0	29.3659	22.6054	4	9	4	1	261	26.906	7.78	6	3
FALSE	High	Master Protein	Q7L0Y3	Mitochondrial ribonuclease P protein 1 OS=Homo sapiens GN=TRMT10C PE=1 SV=2	0	24.5587	15.6328	5	9	5	1	403	47.317	9.36	6	3
FALSE	High	Master Protein	P48047	ATP synthase subunit O, mitochondrial OS=Homo sapiens GN=ATP5O PE=1 SV=1	0	23.6523	31.4554	6	9	6	1	213	23.263	9.96	6	3
FALSE	High	Master Protein	Q8NBJ5	Procollagen galactosyltransferase 1 OS=Homo sapiens GN=COLGALT1 PE=1 SV=1	0	21.2513	9.00322	6	9	6	1	622	71.59	7.31	6	3
FALSE	High	Master Protein	Q9P2N7	Kelch-like protein 13 OS=Homo sapiens GN=KLHL13 PE=1 SV=3	0	19.1271	8.54962	5	9	5	1	655	73.82	6.62	6	3
FALSE	High	Master Protein	P49588	Alanine--tRNA ligase, cytoplasmic OS=Homo sapiens GN=AARS PE=1 SV=2	0	18.387	5.78512	5	9	5	1	968	106.743	5.53	6	3
FALSE	High	Master Protein	O60763	General vesicular transport factor p115 OS=Homo sapiens GN=USO1 PE=1 SV=2	0	15.2613	5.50936	5	9	5	1	962	107.828	4.91	6	3
FALSE	High	Master Protein	O60293	Zinc finger C3H1 domain-containing protein OS=Homo sapiens GN=ZFC3H1 PE=1 SV=3	0	26.3739	3.67019	6	8	6	1	1989	226.214	8.13	6	2
FALSE	High	Master Protein	Q6PGP7	Tetratricopeptide repeat protein 37 OS=Homo sapiens GN=TTC37 PE=1 SV=1	0	22.4769	4.60358	7	8	7	1	1564	175.375	7.53	6	2
FALSE	High	Master Protein	Q14151	Scaffold attachment factor B2 OS=Homo sapiens GN=SAFB2 PE=1 SV=1	0	20.4969	5.87618	6	8	3	1	953	107.408	6.16	6	2
FALSE	High	Master Protein	P24534	Elongation factor 1-beta OS=Homo sapiens GN=EEF1B2 PE=1 SV=3	0	16.7227	19.5556	4	8	4	1	225	24.748	4.67	6	2
FALSE	High	Master Protein	P00505	Aspartate aminotransferase, mitochondrial OS=Homo sapiens GN=GOT2 PE=1 SV=3	0	25.1453	16.9767	7	7	7	1	430	47.487	9.01	6	1
FALSE	High	Master Protein	P01891	HLA class I histocompatibility antigen, A-68 alpha chain OS=Homo sapiens GN=HLA-A PE=1 SV=4	0	24.3421	18.3562	6	7	4	1	365	40.883	6.7	6	1
FALSE	High	Master Protein	Q92540	Protein SMG7 OS=Homo sapiens GN=SMG7 PE=1 SV=2	0	19.25	4.57344	5	5	5	1	1137	127.202	8.72	5
FALSE	High	Master Protein	Q16555	Dihydropyrimidinase-related protein 2 OS=Homo sapiens GN=DPYSL2 PE=1 SV=1	0	18.18	10.4895	5	5	5	1	572	62.255	6.38	5
FALSE	High	Master Protein	O60306	Intron-binding protein aquarius OS=Homo sapiens GN=AQR PE=1 SV=4	0	17.8688	4.0404	5	5	4	1	1485	171.186	6.37	5
FALSE	High	Master Protein	O95340	Bifunctional 3'-phosphoadenosine 5'-phosphosulfate synthase 2 OS=Homo sapiens GN=PAPSS2 PE=1 SV=2	0	17.7222	9.60912	5	5	5	1	614	69.457	8.03	5
FALSE	High	Master Protein	O75955	Flotillin-1 OS=Homo sapiens GN=FLOT1 PE=1 SV=3	0	116.333	44.9649	20	44	20	1	427	47.326	7.49	5	39
FALSE	High	Master Protein	Q6WCQ1	Myosin phosphatase Rho-interacting protein OS=Homo sapiens GN=MPRIP PE=1 SV=3	0	109.613	32.7805	27	36	26	1	1025	116.461	6.21	5	31
FALSE	High	Master Protein	Q9Y4I1	Unconventional myosin-Va OS=Homo sapiens GN=MYO5A PE=1 SV=2	0	99.1414	13.5849	25	31	21	1	1855	215.269	8.48	5	26
FALSE	High	Master Protein	Q53GS9	U4/U6.U5 tri-snRNP-associated protein 2 OS=Homo sapiens GN=USP39 PE=1 SV=2	0	78.7765	31.8584	15	24	15	1	565	65.34	8.91	5	19
FALSE	High	Master Protein	Q14677	Clathrin interactor 1 OS=Homo sapiens GN=CLINT1 PE=1 SV=1	0	77.359	22.4	13	24	13	1	625	68.216	6.42	5	19
FALSE	High	Master Protein	Q9P0K7	Ankycorbin OS=Homo sapiens GN=RAI14 PE=1 SV=2	0	72.3179	21.4286	18	24	18	1	980	109.973	6.21	5	19
FALSE	High	Master Protein	Q8WXX5	DnaJ homolog subfamily C member 9 OS=Homo sapiens GN=DNAJC9 PE=1 SV=1	0	70.8777	43.0769	13	23	13	1	260	29.891	5.73	5	18
FALSE	High	Master Protein	P78362	SRSF protein kinase 2 OS=Homo sapiens GN=SRPK2 PE=1 SV=3	0	62.5328	22.3837	13	22	10	1	688	77.478	4.97	5	17
FALSE	High	Master Protein	Q14137	Ribosome biogenesis protein BOP1 OS=Homo sapiens GN=BOP1 PE=1 SV=2	0	59.269	20.3753	12	21	12	1	746	83.577	6.19	5	16
FALSE	High	Master Protein	Q9BUP0	EF-hand domain-containing protein D1 OS=Homo sapiens GN=EFHD1 PE=1 SV=1	0	29.1283	29.2887	6	21	4	1	239	26.911	5.39	5	16
FALSE	High	Master Protein	Q6UN15	Pre-mRNA 3'-end-processing factor FIP1 OS=Homo sapiens GN=FIP1L1 PE=1 SV=1	0	65.546	18.6869	8	20	8	1	594	66.487	5.59	5	15
FALSE	High	Master Protein	Q9NY93	Probable ATP-dependent RNA helicase DDX56 OS=Homo sapiens GN=DDX56 PE=1 SV=1	0	57.7335	29.7989	14	20	14	1	547	61.551	9.26	5	15
FALSE	High	Master Protein	Q8NC60	Nitric oxide-associated protein 1 OS=Homo sapiens GN=NOA1 PE=1 SV=2	0	48.6437	19.914	9	20	9	1	698	78.409	8.66	5	15
FALSE	High	Master Protein	Q9BU76	Multiple myeloma tumor-associated protein 2 OS=Homo sapiens GN=MMTAG2 PE=1 SV=1	0	44.9432	32.3194	9	20	9	1	263	29.394	10.02	5	15
FALSE	High	Master Protein	Q69YN4	Protein virilizer homolog OS=Homo sapiens GN=KIAA1429 PE=1 SV=2	0	59.3219	8.77483	14	19	14	1	1812	201.898	5.01	5	14
FALSE	High	Master Protein	P37108	Signal recognition particle 14 kDa protein OS=Homo sapiens GN=SRP14 PE=1 SV=2	0	52.8056	53.6765	8	19	8	1	136	14.561	10.04	5	14
FALSE	High	Master Protein	P08651	Nuclear factor 1 C-type OS=Homo sapiens GN=NFIC PE=1 SV=2	0	24.0959	13.189	7	19	4	1	508	55.64	8.38	5	14
FALSE	High	Master Protein	Q02978	Mitochondrial 2-oxoglutarate/malate carrier protein OS=Homo sapiens GN=SLC25A11 PE=1 SV=3	0	45.9065	28.9809	10	18	10	1	314	34.04	9.91	5	13
FALSE	High	Master Protein	Q13148	TAR DNA-binding protein 43 OS=Homo sapiens GN=TARDBP PE=1 SV=1	0	37.2716	18.1159	5	18	5	1	414	44.711	6.19	5	13
FALSE	High	Master Protein	P14649	Myosin light chain 6B OS=Homo sapiens GN=MYL6B PE=1 SV=1	0	26.2534	27.8846	6	18	4	1	208	22.75	5.73	5	13
FALSE	High	Master Protein	P60660	Myosin light polypeptide 6 OS=Homo sapiens GN=MYL6 PE=1 SV=2	0	17.4139	21.8543	3	18	1	1	151	16.919	4.65	5	13
FALSE	High	Master Protein	P06493	Cyclin-dependent kinase 1 OS=Homo sapiens GN=CDK1 PE=1 SV=3	0	49.0939	36.3636	10	17	8	1	297	34.074	8.4	5	12
FALSE	High	Master Protein	P17931	Galectin-3 OS=Homo sapiens GN=LGALS3 PE=1 SV=5	0	43.0559	31.2	7	17	7	1	250	26.136	8.56	5	12
FALSE	High	Master Protein	O94964	Protein SOGA1 OS=Homo sapiens GN=SOGA1 PE=1 SV=2	0	40.9978	10.3303	13	17	11	1	1423	159.661	6.46	5	12
FALSE	High	Master Protein	O60884	DnaJ homolog subfamily A member 2 OS=Homo sapiens GN=DNAJA2 PE=1 SV=1	0	27.8097	20.3883	8	17	8	1	412	45.717	6.48	5	12
FALSE	High	Master Protein	O15460	Prolyl 4-hydroxylase subunit alpha-2 OS=Homo sapiens GN=P4HA2 PE=1 SV=1	0	54.3942	27.1028	10	16	10	1	535	60.864	5.71	5	11
FALSE	High	Master Protein	Q9Y2R4	Probable ATP-dependent RNA helicase DDX52 OS=Homo sapiens GN=DDX52 PE=1 SV=3	0	33.7078	19.5326	10	16	9	1	599	67.456	9.67	5	11
FALSE	High	Master Protein	O60264	SWI/SNF-related matrix-associated actin-dependent regulator of chromatin subfamily A member 5 OS=Homo sapiens GN=SMARCA5 PE=1 SV=1	0	32.538	11.0266	11	16	11	1	1052	121.828	8.09	5	11
FALSE	High	Master Protein	P61158	Actin-related protein 3 OS=Homo sapiens GN=ACTR3 PE=1 SV=3	0	40.5837	26.3158	10	15	10	1	418	47.341	5.88	5	10
FALSE	High	Master Protein	O00257	E3 SUMO-protein ligase CBX4 OS=Homo sapiens GN=CBX4 PE=1 SV=3	0	38.4873	15.5357	9	15	9	1	560	61.329	9.36	5	10
FALSE	High	Master Protein	Q14004	Cyclin-dependent kinase 13 OS=Homo sapiens GN=CDK13 PE=1 SV=2	0	32.1262	6.34921	9	15	5	1	1512	164.823	9.69	5	10
FALSE	High	Master Protein	O60568	Procollagen-lysine,2-oxoglutarate 5-dioxygenase 3 OS=Homo sapiens GN=PLOD3 PE=1 SV=1	0	29.2603	13.5501	9	15	9	1	738	84.731	6.05	5	10
FALSE	High	Master Protein	P35268	60S ribosomal protein L22 OS=Homo sapiens GN=RPL22 PE=1 SV=2	0	19.031	30.4688	5	15	5	1	128	14.778	9.19	5	10
FALSE	High	Master Protein	Q16637	Survival motor neuron protein OS=Homo sapiens GN=SMN1 PE=1 SV=1	0	43.5354	26.5306	6	14	6	1	294	31.828	6.55	5	9
FALSE	High	Master Protein	P40938	Replication factor C subunit 3 OS=Homo sapiens GN=RFC3 PE=1 SV=2	0	41.0019	27.809	9	14	9	1	356	40.53	8.34	5	9
FALSE	High	Master Protein	Q9UBB4	Ataxin-10 OS=Homo sapiens GN=ATXN10 PE=1 SV=1	0	39.9935	20	8	14	8	1	475	53.455	5.25	5	9
FALSE	High	Master Protein	Q9UNM6	26S proteasome non-ATPase regulatory subunit 13 OS=Homo sapiens GN=PSMD13 PE=1 SV=2	0	32.2461	23.4043	9	14	9	1	376	42.918	5.81	5	9
FALSE	High	Master Protein	Q9Y2P8	RNA 3'-terminal phosphate cyclase-like protein OS=Homo sapiens GN=RCL1 PE=1 SV=3	0	32.0309	22.252	7	14	7	1	373	40.817	9.26	5	9
FALSE	High	Master Protein	Q9BZI7	Regulator of nonsense transcripts 3B OS=Homo sapiens GN=UPF3B PE=1 SV=1	0	29.1477	11.8012	6	14	6	1	483	57.727	9.48	5	9
FALSE	High	Master Protein	Q8NEY8	Periphilin-1 OS=Homo sapiens GN=PPHLN1 PE=1 SV=2	0	25.5164	19.214	8	14	8	1	458	52.705	9.11	5	9
FALSE	High	Master Protein	Q9UKA9	Polypyrimidine tract-binding protein 2 OS=Homo sapiens GN=PTBP2 PE=1 SV=1	0	23.6733	15.4426	6	14	5	1	531	57.455	8.66	5	9
FALSE	High	Master Protein	P62249	40S ribosomal protein S16 OS=Homo sapiens GN=RPS16 PE=1 SV=2	0	21.5721	33.5616	6	14	6	1	146	16.435	10.21	5	9
FALSE	High	Master Protein	Q15019	Septin-2 OS=Homo sapiens GN=SEPT2 PE=1 SV=1	0	43.5406	32.964	10	13	10	1	361	41.461	6.6	5	8
FALSE	High	Master Protein	Q07021	Complement component 1 Q subcomponent-binding protein, mitochondrial OS=Homo sapiens GN=C1QBP PE=1 SV=1	0	40.3622	21.9858	4	13	4	1	282	31.343	4.84	5	8
FALSE	High	Master Protein	Q5T3I0	G patch domain-containing protein 4 OS=Homo sapiens GN=GPATCH4 PE=1 SV=2	0	37.1695	15.6951	6	13	6	1	446	50.351	9.63	5	8
FALSE	High	Master Protein	Q13619	Cullin-4A OS=Homo sapiens GN=CUL4A PE=1 SV=3	0	37.1276	14.7563	10	13	10	1	759	87.624	8.13	5	8
FALSE	High	Master Protein	Q8N567	Zinc finger CCHC domain-containing protein 9 OS=Homo sapiens GN=ZCCHC9 PE=2 SV=2	0	33.8727	24.7232	6	13	6	1	271	30.457	9.17	5	8
FALSE	High	Master Protein	Q9NYL2	Mitogen-activated protein kinase kinase kinase MLT OS=Homo sapiens GN=ZAK PE=1 SV=3	0	30.7091	11.875	8	13	8	1	800	91.098	7.87	5	8
FALSE	High	Master Protein	P09914	Interferon-induced protein with tetratricopeptide repeats 1 OS=Homo sapiens GN=IFIT1 PE=1 SV=2	0	28.8859	16.5272	7	13	6	1	478	55.325	7.2	5	8
FALSE	High	Master Protein	P25789	Proteasome subunit alpha type-4 OS=Homo sapiens GN=PSMA4 PE=1 SV=1	0	26.0269	24.9042	7	13	7	1	261	29.465	7.72	5	8
FALSE	High	Master Protein	Q7Z2T5	TRMT1-like protein OS=Homo sapiens GN=TRMT1L PE=1 SV=2	0	25.7627	11.869	8	13	8	1	733	81.695	7.88	5	8
FALSE	High	Master Protein	Q9NW13	RNA-binding protein 28 OS=Homo sapiens GN=RBM28 PE=1 SV=3	0	20.6461	7.90514	7	13	7	1	759	85.685	9.22	5	8
FALSE	High	Master Protein	Q9HC21	Mitochondrial thiamine pyrophosphate carrier OS=Homo sapiens GN=SLC25A19 PE=1 SV=1	0	18.6381	19.0625	7	13	7	1	320	35.488	9.55	5	8
FALSE	High	Master Protein	Q9Y2D5	A-kinase anchor protein 2 OS=Homo sapiens GN=AKAP2 PE=1 SV=3	0	34.7508	9.19674	6	12	6	1	859	94.603	5.11	5	7
FALSE	High	Master Protein	Q9ULV4	Coronin-1C OS=Homo sapiens GN=CORO1C PE=1 SV=1	0	34.471	18.7764	7	12	7	1	474	53.215	7.08	5	7
FALSE	High	Master Protein	Q9UBB9	Tuftelin-interacting protein 11 OS=Homo sapiens GN=TFIP11 PE=1 SV=1	0	26.9245	11.4695	8	12	8	1	837	96.758	5.67	5	7
FALSE	High	Master Protein	O00151	PDZ and LIM domain protein 1 OS=Homo sapiens GN=PDLIM1 PE=1 SV=4	0	25.3161	20.6687	5	12	5	1	329	36.049	7.02	5	7
FALSE	High	Master Protein	Q9UBX3	Mitochondrial dicarboxylate carrier OS=Homo sapiens GN=SLC25A10 PE=1 SV=2	0	23.8082	19.5122	7	12	7	1	287	31.262	9.54	5	7
FALSE	High	Master Protein	Q9BWE0	Replication initiator 1 OS=Homo sapiens GN=REPIN1 PE=1 SV=1	0	22.4969	9.52381	4	12	4	1	567	63.534	9.98	5	7
FALSE	High	Master Protein	Q8WUA4	General transcription factor 3C polypeptide 2 OS=Homo sapiens GN=GTF3C2 PE=1 SV=2	0	22.4249	9.11087	8	12	7	1	911	100.616	7.31	5	7
FALSE	High	Master Protein	Q9UNF1	Melanoma-associated antigen D2 OS=Homo sapiens GN=MAGED2 PE=1 SV=2	0	20.5908	12.5413	7	12	7	1	606	64.914	9.32	5	7
FALSE	High	Master Protein	O15372	Eukaryotic translation initiation factor 3 subunit H OS=Homo sapiens GN=EIF3H PE=1 SV=1	0	14.3309	17.0455	6	12	6	1	352	39.905	6.54	5	7
FALSE	High	Master Protein	Q96HR8	H/ACA ribonucleoprotein complex non-core subunit NAF1 OS=Homo sapiens GN=NAF1 PE=1 SV=2	0	35.0618	10.7287	4	11	4	1	494	53.683	4.87	5	6
FALSE	High	Master Protein	Q8IUF8	Bifunctional lysine-specific demethylase and histidyl-hydroxylase MINA OS=Homo sapiens GN=MINA PE=1 SV=1	0	33.0616	17.6344	8	11	8	1	465	52.767	6.7	5	6
FALSE	High	Master Protein	A3KMH1	von Willebrand factor A domain-containing protein 8 OS=Homo sapiens GN=VWA8 PE=1 SV=2	0	29.3226	5.72178	10	11	10	1	1905	214.689	7.4	5	6
FALSE	High	Master Protein	Q9Y316	Protein MEMO1 OS=Homo sapiens GN=MEMO1 PE=1 SV=1	0	27.972	22.2222	6	11	6	1	297	33.711	7.14	5	6
FALSE	High	Master Protein	Q86YP4	Transcriptional repressor p66-alpha OS=Homo sapiens GN=GATAD2A PE=1 SV=1	0	27.8051	15.1659	7	11	7	1	633	68.021	9.94	5	6
FALSE	High	Master Protein	Q08945	FACT complex subunit SSRP1 OS=Homo sapiens GN=SSRP1 PE=1 SV=1	0	26.8168	9.30889	7	11	7	1	709	81.024	6.87	5	6
FALSE	High	Master Protein	P62195	26S protease regulatory subunit 8 OS=Homo sapiens GN=PSMC5 PE=1 SV=1	0	26.7142	23.1527	8	11	7	1	406	45.597	7.55	5	6
FALSE	High	Master Protein	P16070	CD44 antigen OS=Homo sapiens GN=CD44 PE=1 SV=3	0	25.4309	7.27763	5	11	5	1	742	81.487	5.33	5	6
FALSE	High	Master Protein	Q03701	CCAAT/enhancer-binding protein zeta OS=Homo sapiens GN=CEBPZ PE=1 SV=3	0	24.7507	6.07211	7	11	7	1	1054	120.898	5.94	5	6
FALSE	High	Master Protein	Q969T9	WW domain-binding protein 2 OS=Homo sapiens GN=WBP2 PE=1 SV=1	0	22.185	16.8582	5	11	5	1	261	28.068	5.91	5	6
FALSE	High	Master Protein	Q92979	Ribosomal RNA small subunit methyltransferase NEP1 OS=Homo sapiens GN=EMG1 PE=1 SV=4	0	21.827	18.4426	4	11	4	1	244	26.703	9.17	5	6
FALSE	High	Master Protein	P78563	Double-stranded RNA-specific editase 1 OS=Homo sapiens GN=ADARB1 PE=1 SV=1	0	21.3761	10.6613	6	11	6	1	741	80.713	9.01	5	6
FALSE	High	Master Protein	P82914	28S ribosomal protein S15, mitochondrial OS=Homo sapiens GN=MRPS15 PE=1 SV=1	0	20.6287	16.3424	5	11	5	1	257	29.823	10.48	5	6
FALSE	High	Master Protein	P62191	26S protease regulatory subunit 4 OS=Homo sapiens GN=PSMC1 PE=1 SV=1	0	20.5809	15.2273	5	11	4	1	440	49.154	6.21	5	6
FALSE	High	Master Protein	Q9UM00	Transmembrane and coiled-coil domain-containing protein 1 OS=Homo sapiens GN=TMCO1 PE=1 SV=1	0	19.3132	20.7447	4	11	4	1	188	21.161	9.74	5	6
FALSE	High	Master Protein	P05109	Protein S100-A8 OS=Homo sapiens GN=S100A8 PE=1 SV=1	0	8.45411	23.6559	2	11	2	1	93	10.828	7.03	5	6
FALSE	High	Master Protein	P22695	Cytochrome b-c1 complex subunit 2, mitochondrial OS=Homo sapiens GN=UQCRC2 PE=1 SV=3	0	44.4235	19.426	6	10	6	1	453	48.413	8.63	5	5
FALSE	High	Master Protein	P51571	Translocon-associated protein subunit delta OS=Homo sapiens GN=SSR4 PE=1 SV=1	0	28.6068	20.2312	4	10	4	1	173	18.987	6.15	5	5
FALSE	High	Master Protein	P40763	Signal transducer and activator of transcription 3 OS=Homo sapiens GN=STAT3 PE=1 SV=2	0	28.2078	8.7013	6	10	6	1	770	88.011	6.3	5	5
FALSE	High	Master Protein	Q8IYB3	Serine/arginine repetitive matrix protein 1 OS=Homo sapiens GN=SRRM1 PE=1 SV=2	0	26.5218	10.0664	6	10	6	1	904	102.274	11.84	5	5
FALSE	High	Master Protein	Q7Z2W9	39S ribosomal protein L21, mitochondrial OS=Homo sapiens GN=MRPL21 PE=1 SV=2	0	26.3216	27.8049	5	10	5	1	205	22.8	9.89	5	5
FALSE	High	Master Protein	Q99733	Nucleosome assembly protein 1-like 4 OS=Homo sapiens GN=NAP1L4 PE=1 SV=1	0	23.7656	17.3333	6	10	5	1	375	42.797	4.69	5	5
FALSE	High	Master Protein	O76031	ATP-dependent Clp protease ATP-binding subunit clpX-like, mitochondrial OS=Homo sapiens GN=CLPX PE=1 SV=2	0	23.2191	13.4281	7	10	7	1	633	69.181	7.58	5	5
FALSE	High	Master Protein	Q86UW9	Probable E3 ubiquitin-protein ligase DTX2 OS=Homo sapiens GN=DTX2 PE=1 SV=3	0	21.5884	8.5209	4	10	4	1	622	67.203	8.47	5	5
FALSE	High	Master Protein	Q13428	Treacle protein OS=Homo sapiens GN=TCOF1 PE=1 SV=3	0	20.9335	4.6371	7	10	7	1	1488	152.015	9.04	5	5
FALSE	High	Master Protein	Q9H814	Phosphorylated adapter RNA export protein OS=Homo sapiens GN=PHAX PE=1 SV=1	0	19.1777	11.9289	5	10	5	1	394	44.375	5.4	5	5
FALSE	High	Master Protein	Q9UMY1	Nucleolar protein 7 OS=Homo sapiens GN=NOL7 PE=1 SV=2	0	15.4556	15.1751	4	10	4	1	257	29.409	9.67	5	5
FALSE	High	Master Protein	Q00059	Transcription factor A, mitochondrial OS=Homo sapiens GN=TFAM PE=1 SV=1	0	14.9607	14.6341	4	10	4	1	246	29.078	9.72	5	5
FALSE	High	Master Protein	P08243	Asparagine synthetase [glutamine-hydrolyzing] OS=Homo sapiens GN=ASNS PE=1 SV=4	0	12.546	8.02139	5	10	5	1	561	64.329	6.86	5	5
FALSE	High	Master Protein	P50750	Cyclin-dependent kinase 9 OS=Homo sapiens GN=CDK9 PE=1 SV=3	0	11.3959	9.67742	4	10	2	1	372	42.75	8.79	5	5
FALSE	High	Master Protein	P61221	ATP-binding cassette sub-family E member 1 OS=Homo sapiens GN=ABCE1 PE=1 SV=1	0	29.5359	16.8614	8	9	8	1	599	67.271	8.34	5	4
FALSE	High	Master Protein	Q8WXI9	Transcriptional repressor p66-beta OS=Homo sapiens GN=GATAD2B PE=1 SV=1	0	28.455	12.9848	5	9	5	1	593	65.22	9.7	5	4
FALSE	High	Master Protein	P0CB38	Polyadenylate-binding protein 4-like OS=Homo sapiens GN=PABPC4L PE=2 SV=1	0	26.8711	9.18919	5	9	3	1	370	41.827	9.5	5	4
FALSE	High	Master Protein	P61106	Ras-related protein Rab-14 OS=Homo sapiens GN=RAB14 PE=1 SV=4	0	24.9343	26.0465	6	9	5	1	215	23.882	6.21	5	4
FALSE	High	Master Protein	P51149	Ras-related protein Rab-7a OS=Homo sapiens GN=RAB7A PE=1 SV=1	0	21.247	26.57	5	9	5	1	207	23.475	6.7	5	4
FALSE	High	Master Protein	Q8IXQ6	Poly [ADP-ribose] polymerase 9 OS=Homo sapiens GN=PARP9 PE=1 SV=2	0	20.65	6.90867	6	9	6	1	854	96.281	7.91	5	4
FALSE	High	Master Protein	Q02790	Peptidyl-prolyl cis-trans isomerase FKBP4 OS=Homo sapiens GN=FKBP4 PE=1 SV=3	0	20.0109	12.2004	5	9	5	1	459	51.772	5.43	5	4
FALSE	High	Master Protein	Q15907	Ras-related protein Rab-11B OS=Homo sapiens GN=RAB11B PE=1 SV=4	0	19.7662	24.3119	5	9	5	1	218	24.473	5.94	5	4
FALSE	High	Master Protein	Q9BX40	Protein LSM14 homolog B OS=Homo sapiens GN=LSM14B PE=1 SV=1	0	18.977	10.9091	3	9	3	1	385	42.045	9.69	5	4
FALSE	High	Master Protein	P78337	Pituitary homeobox 1 OS=Homo sapiens GN=PITX1 PE=1 SV=2	0	16.4026	14.6497	4	9	4	1	314	34.106	8.98	5	4
FALSE	High	Master Protein	Q3MHD2	Protein LSM12 homolog OS=Homo sapiens GN=LSM12 PE=1 SV=2	0	16.248	13.8462	2	9	2	1	195	21.687	7.74	5	4
FALSE	High	Master Protein	P23378	Glycine dehydrogenase (decarboxylating), mitochondrial OS=Homo sapiens GN=GLDC PE=1 SV=2	0	14.2093	1.86275	1	9	1	1	1020	112.657	7.11	5	4
FALSE	High	Master Protein	Q86VH2	Kinesin-like protein KIF27 OS=Homo sapiens GN=KIF27 PE=2 SV=1	0.00571973	3.24046	1.21342	2	9	2	1	1401	160.184	7.28	5	4
FALSE	High	Master Protein	O60664	Perilipin-3 OS=Homo sapiens GN=PLIN3 PE=1 SV=3	0	28.5209	15.4378	5	8	5	1	434	47.046	5.44	5	3
FALSE	High	Master Protein	Q6L8Q7	2',5'-phosphodiesterase 12 OS=Homo sapiens GN=PDE12 PE=1 SV=2	0	26.2886	13.9573	6	8	6	1	609	67.309	6.57	5	3
FALSE	High	Master Protein	P38606	V-type proton ATPase catalytic subunit A OS=Homo sapiens GN=ATP6V1A PE=1 SV=2	0	21.2787	7.29335	4	8	4	1	617	68.26	5.52	5	3
FALSE	High	Master Protein	P51148	Ras-related protein Rab-5C OS=Homo sapiens GN=RAB5C PE=1 SV=2	0	20.6934	26.8519	5	8	2	1	216	23.468	8.41	5	3
FALSE	High	Master Protein	Q00653	Nuclear factor NF-kappa-B p100 subunit OS=Homo sapiens GN=NFKB2 PE=1 SV=4	0	19.2426	7.66667	7	8	7	1	900	96.689	6.25	5	3
FALSE	High	Master Protein	P62487	DNA-directed RNA polymerase II subunit RPB7 OS=Homo sapiens GN=POLR2G PE=1 SV=1	0	19.021	30.2326	5	8	5	1	172	19.282	5.54	5	3
FALSE	High	Master Protein	P16152	Carbonyl reductase [NADPH] 1 OS=Homo sapiens GN=CBR1 PE=1 SV=3	0	18.8047	18.0505	5	8	5	1	277	30.356	8.32	5	3
FALSE	High	Master Protein	E9PRG8	Uncharacterized protein C11orf98 OS=Homo sapiens GN=C11orf98 PE=4 SV=1	0	18.7778	23.7705	4	8	3	1	122	13.79	11.69	5	3
FALSE	High	Master Protein	P63000	Ras-related C3 botulinum toxin substrate 1 OS=Homo sapiens GN=RAC1 PE=1 SV=1	0	18.4151	22.9167	5	8	4	1	192	21.436	8.5	5	3
FALSE	High	Master Protein	Q9Y305	Acyl-coenzyme A thioesterase 9, mitochondrial OS=Homo sapiens GN=ACOT9 PE=1 SV=2	0	17.7531	10.7062	6	8	6	1	439	49.87	8.6	5	3
FALSE	High	Master Protein	O14744	Protein arginine N-methyltransferase 5 OS=Homo sapiens GN=PRMT5 PE=1 SV=4	0	17.4179	9.57614	6	8	6	1	637	72.638	6.29	5	3
FALSE	High	Master Protein	P58107	Epiplakin OS=Homo sapiens GN=EPPK1 PE=1 SV=2	0	16.523	8.19253	5	8	2	1	5090	555.279	5.6	5	3
FALSE	High	Master Protein	P52948	Nuclear pore complex protein Nup98-Nup96 OS=Homo sapiens GN=NUP98 PE=1 SV=4	0	16.3272	3.63236	6	8	6	1	1817	197.457	6.4	5	3
FALSE	High	Master Protein	P28066	Proteasome subunit alpha type-5 OS=Homo sapiens GN=PSMA5 PE=1 SV=3	0	15.9763	20.332	4	8	4	1	241	26.394	4.79	5	3
FALSE	High	Master Protein	P35520	Cystathionine beta-synthase OS=Homo sapiens GN=CBS PE=1 SV=2	0	13.3496	6.71506	5	8	5	1	551	60.548	6.65	5	3
FALSE	High	Master Protein	Q9Y2F9	BTB/POZ domain-containing protein 3 OS=Homo sapiens GN=BTBD3 PE=2 SV=1	0	13.1465	7.66284	4	8	4	1	522	58.382	7.46	5	3
FALSE	High	Master Protein	A0FGR8	Extended synaptotagmin-2 OS=Homo sapiens GN=ESYT2 PE=1 SV=1	0	12.6735	4.45168	4	8	4	1	921	102.294	9.26	5	3
FALSE	High	Master Protein	Q15758	Neutral amino acid transporter B(0) OS=Homo sapiens GN=SLC1A5 PE=1 SV=2	0	12.4645	5.73013	3	8	3	1	541	56.562	5.48	5	3
FALSE	High	Master Protein	P51153	Ras-related protein Rab-13 OS=Homo sapiens GN=RAB13 PE=1 SV=1	0	10.5085	18.2266	4	8	2	1	203	22.76	9.19	5	3
FALSE	High	Master Protein	P42166	Lamina-associated polypeptide 2, isoform alpha OS=Homo sapiens GN=TMPO PE=1 SV=2	0	10.4781	5.90778	4	8	3	1	694	75.446	7.66	5	3
FALSE	High	Master Protein	Q8TAT6	Nuclear protein localization protein 4 homolog OS=Homo sapiens GN=NPLOC4 PE=1 SV=3	0	32.3652	12.1711	6	7	6	1	608	68.077	6.38	5	2
FALSE	High	Master Protein	O14964	Hepatocyte growth factor-regulated tyrosine kinase substrate OS=Homo sapiens GN=HGS PE=1 SV=1	0	21.1123	7.07851	5	7	5	1	777	86.138	6.16	5	2
FALSE	High	Master Protein	Q9UGU0	Transcription factor 20 OS=Homo sapiens GN=TCF20 PE=1 SV=3	0	19.2513	2.80612	4	7	4	1	1960	211.641	9.04	5	2
FALSE	High	Master Protein	Q96A33	Coiled-coil domain-containing protein 47 OS=Homo sapiens GN=CCDC47 PE=1 SV=1	0	18.1518	13.8716	6	7	6	1	483	55.838	4.87	5	2
FALSE	High	Master Protein	O95625	Zinc finger and BTB domain-containing protein 11 OS=Homo sapiens GN=ZBTB11 PE=1 SV=2	0	16.8645	5.03324	6	7	6	1	1053	119.308	8.66	5	2
FALSE	High	Master Protein	P51610	Host cell factor 1 OS=Homo sapiens GN=HCFC1 PE=1 SV=2	0	15.9542	3.39066	6	7	6	1	2035	208.602	7.46	5	2
FALSE	High	Master Protein	O95302	Peptidyl-prolyl cis-trans isomerase FKBP9 OS=Homo sapiens GN=FKBP9 PE=1 SV=2	0	15.7171	8.77193	5	7	5	1	570	63.044	5.08	5	2
FALSE	High	Master Protein	Q12792	Twinfilin-1 OS=Homo sapiens GN=TWF1 PE=1 SV=3	0	12.9639	12	5	7	5	1	350	40.258	6.96	5	2
FALSE	High	Master Protein	Q9NZ01	Very-long-chain enoyl-CoA reductase OS=Homo sapiens GN=TECR PE=1 SV=1	0	12.894	8.11688	3	7	3	1	308	36.011	9.45	5	2
FALSE	High	Master Protein	Q96SW2	Protein cereblon OS=Homo sapiens GN=CRBN PE=1 SV=1	0	12.2313	8.1448	3	7	3	1	442	50.513	5.63	5	2
FALSE	High	Master Protein	P01023	Alpha-2-macroglobulin OS=Homo sapiens GN=A2M PE=1 SV=3	0	9.69545	2.03528	3	7	3	1	1474	163.188	6.46	5	2
FALSE	High	Master Protein	P50395	Rab GDP dissociation inhibitor beta OS=Homo sapiens GN=GDI2 PE=1 SV=2	0	22.7729	11.4607	4	6	4	1	445	50.631	6.47	5	1
FALSE	High	Master Protein	Q9UNF0	Protein kinase C and casein kinase substrate in neurons protein 2 OS=Homo sapiens GN=PACSIN2 PE=1 SV=2	0	20.6612	9.67078	4	6	4	1	486	55.704	5.2	5	1
FALSE	High	Master Protein	Q9NSD9	Phenylalanine--tRNA ligase beta subunit OS=Homo sapiens GN=FARSB PE=1 SV=3	0	18.0639	8.65874	5	6	5	1	589	66.074	6.84	5	1
FALSE	High	Master Protein	Q9Y5B9	FACT complex subunit SPT16 OS=Homo sapiens GN=SUPT16H PE=1 SV=1	0	17.1018	6.01719	6	6	6	1	1047	119.838	5.66	5	1
FALSE	High	Master Protein	Q9BTC0	Death-inducer obliterator 1 OS=Homo sapiens GN=DIDO1 PE=1 SV=5	0	15.817	2.5	5	6	5	1	2240	243.723	7.88	5	1
FALSE	High	Master Protein	P19367	Hexokinase-1 OS=Homo sapiens GN=HK1 PE=1 SV=3	0	15.3937	4.79826	4	6	3	1	917	102.42	6.8	5	1
FALSE	High	Master Protein	P49748	Very long-chain specific acyl-CoA dehydrogenase, mitochondrial OS=Homo sapiens GN=ACADVL PE=1 SV=1	0	13.7906	6.56489	4	6	4	1	655	70.345	8.75	5	1
FALSE	High	Master Protein	Q9H6R7	WD repeat and coiled-coil-containing protein C2orf44 OS=Homo sapiens GN=C2orf44 PE=1 SV=1	0	10.9474	4.85437	3	6	3	1	721	79.086	6.7	5	1
FALSE	High	Master Protein	P03989	HLA class I histocompatibility antigen, B-27 alpha chain OS=Homo sapiens GN=HLA-B PE=1 SV=2	0	18.0679	12.9834	4	4	2	1	362	40.403	5.82	4
FALSE	High	Master Protein	P04114	Apolipoprotein B-100 OS=Homo sapiens GN=APOB PE=1 SV=2	0	13.138	0.942362	4	4	4	1	4563	515.283	7.05	4
FALSE	High	Master Protein	Q99715	Collagen alpha-1(XII) chain OS=Homo sapiens GN=COL12A1 PE=1 SV=2	0	12.7869	1.66503	4	4	4	1	3063	332.941	5.53	4
FALSE	High	Master Protein	Q9HD67	Unconventional myosin-X OS=Homo sapiens GN=MYO10 PE=1 SV=3	0	11.8163	1.70068	4	4	4	1	2058	237.198	6.21	4
FALSE	High	Master Protein	Q14204	Cytoplasmic dynein 1 heavy chain 1 OS=Homo sapiens GN=DYNC1H1 PE=1 SV=5	0	8.87198	0.77486	4	4	4	1	4646	532.072	6.4	4
FALSE	High	Master Protein	Q96N67	Dedicator of cytokinesis protein 7 OS=Homo sapiens GN=DOCK7 PE=1 SV=4	0	138.66	18.4579	37	48	37	1	2140	242.407	6.8	4	44
FALSE	High	Master Protein	Q6NYC8	Phostensin OS=Homo sapiens GN=PPP1R18 PE=1 SV=1	0	105.573	38.1729	19	35	19	1	613	67.902	5.4	4	31
FALSE	High	Master Protein	Q14254	Flotillin-2 OS=Homo sapiens GN=FLOT2 PE=1 SV=2	0	94.3902	33.4112	16	28	16	1	428	47.035	5.25	4	24
FALSE	High	Master Protein	Q9UII4	E3 ISG15--protein ligase HERC5 OS=Homo sapiens GN=HERC5 PE=1 SV=2	0	107.846	21.2891	19	27	19	1	1024	116.777	7.65	4	23
FALSE	High	Master Protein	O95363	Phenylalanine--tRNA ligase, mitochondrial OS=Homo sapiens GN=FARS2 PE=1 SV=1	0	76.1893	31.4856	14	23	14	1	451	52.324	7.46	4	19
FALSE	High	Master Protein	Q96QE5	Transcription elongation factor, mitochondrial OS=Homo sapiens GN=TEFM PE=1 SV=1	0	61.2635	38.0556	15	23	15	1	360	41.65	9.32	4	19
FALSE	High	Master Protein	Q5JWF2	Guanine nucleotide-binding protein G(s) subunit alpha isoforms XLas OS=Homo sapiens GN=GNAS PE=1 SV=2	0	37.2476	12.4397	9	23	8	1	1037	110.956	5.03	4	19
FALSE	High	Master Protein	Q8IVL5	Prolyl 3-hydroxylase 2 OS=Homo sapiens GN=P3H2 PE=1 SV=1	0	61.384	23.7288	14	20	14	1	708	80.933	5.71	4	16
FALSE	High	Master Protein	P06241	Tyrosine-protein kinase Fyn OS=Homo sapiens GN=FYN PE=1 SV=3	0	32.6745	20.4842	11	19	4	1	537	60.723	6.67	4	15
FALSE	High	Master Protein	O75569	Interferon-inducible double-stranded RNA-dependent protein kinase activator A OS=Homo sapiens GN=PRKRA PE=1 SV=1	0	54.3709	35.1438	10	18	10	1	313	34.383	8.41	4	14
FALSE	High	Master Protein	P98082	Disabled homolog 2 OS=Homo sapiens GN=DAB2 PE=1 SV=3	0	52.1861	17.5325	11	18	11	1	770	82.397	5.53	4	14
FALSE	High	Master Protein	Q9Y2W2	WW domain-binding protein 11 OS=Homo sapiens GN=WBP11 PE=1 SV=1	0	39.4578	14.1966	10	18	10	1	641	69.954	8.38	4	14
FALSE	High	Master Protein	Q9BYD6	39S ribosomal protein L1, mitochondrial OS=Homo sapiens GN=MRPL1 PE=1 SV=2	0	56.9691	32.3077	10	17	10	1	325	36.885	8.78	4	13
FALSE	High	Master Protein	O00442	RNA 3'-terminal phosphate cyclase OS=Homo sapiens GN=RTCA PE=1 SV=1	0	70.9334	26.2295	9	16	9	1	366	39.311	7.85	4	12
FALSE	High	Master Protein	P38432	Coilin OS=Homo sapiens GN=COIL PE=1 SV=1	0	45.4096	20.6597	9	16	9	1	576	62.57	9.07	4	12
FALSE	High	Master Protein	Q14008	Cytoskeleton-associated protein 5 OS=Homo sapiens GN=CKAP5 PE=1 SV=3	0	40.4962	7.52953	14	16	14	1	2032	225.352	7.8	4	12
FALSE	High	Master Protein	Q6P1M3	Lethal(2) giant larvae protein homolog 2 OS=Homo sapiens GN=LLGL2 PE=1 SV=2	0	37.6458	14.4118	13	16	13	1	1020	113.377	7.52	4	12
FALSE	High	Master Protein	P43355	Melanoma-associated antigen 1 OS=Homo sapiens GN=MAGEA1 PE=1 SV=1	0	33.4836	18.123	8	16	8	1	309	34.32	4.86	4	12
FALSE	High	Master Protein	Q9Y580	RNA-binding protein 7 OS=Homo sapiens GN=RBM7 PE=1 SV=1	0	44.0381	41.3534	8	15	8	1	266	30.485	9.57	4	11
FALSE	High	Master Protein	Q9Y446	Plakophilin-3 OS=Homo sapiens GN=PKP3 PE=1 SV=1	0	37.2698	17.8168	11	15	11	1	797	87.029	9.32	4	11
FALSE	High	Master Protein	Q9HC52	Chromobox protein homolog 8 OS=Homo sapiens GN=CBX8 PE=1 SV=3	0	24.2461	20.3085	8	15	8	1	389	43.369	9.91	4	11
FALSE	High	Master Protein	O75367	Core histone macro-H2A.1 OS=Homo sapiens GN=H2AFY PE=1 SV=4	0	51.8774	34.9462	9	14	9	1	372	39.592	9.79	4	10
FALSE	High	Master Protein	P35606	Coatomer subunit beta' OS=Homo sapiens GN=COPB2 PE=1 SV=2	0	40.0747	13.1347	10	14	10	1	906	102.422	5.27	4	10
FALSE	High	Master Protein	Q15293	Reticulocalbin-1 OS=Homo sapiens GN=RCN1 PE=1 SV=1	0	35.8968	22.6586	7	14	7	1	331	38.866	5	4	10
FALSE	High	Master Protein	P36957	Dihydrolipoyllysine-residue succinyltransferase component of 2-oxoglutarate dehydrogenase complex, mitochondrial OS=Homo sapiens GN=DLST PE=1 SV=4	0	13.115	10.8168	5	14	5	1	453	48.724	8.95	4	10
FALSE	High	Master Protein	Q13823	Nucleolar GTP-binding protein 2 OS=Homo sapiens GN=GNL2 PE=1 SV=1	0	37.1227	11.0807	7	13	7	1	731	83.603	9.25	4	9
FALSE	High	Master Protein	Q01780	Exosome component 10 OS=Homo sapiens GN=EXOSC10 PE=1 SV=2	0	35.5252	12.7684	10	13	10	1	885	100.768	8.46	4	9
FALSE	High	Master Protein	P59998	Actin-related protein 2/3 complex subunit 4 OS=Homo sapiens GN=ARPC4 PE=1 SV=3	0	32.3354	27.381	8	13	8	1	168	19.654	8.43	4	9
FALSE	High	Master Protein	Q86Y79	Probable peptidyl-tRNA hydrolase OS=Homo sapiens GN=PTRH1 PE=1 SV=1	0	30.7465	23.3645	6	13	6	1	214	22.922	10.56	4	9
FALSE	High	Master Protein	Q8NDT2	Putative RNA-binding protein 15B OS=Homo sapiens GN=RBM15B PE=1 SV=3	0	25.0081	11.3483	9	13	7	1	890	97.147	9.85	4	9
FALSE	High	Master Protein	O00629	Importin subunit alpha-3 OS=Homo sapiens GN=KPNA4 PE=1 SV=1	0	38.2121	13.2438	6	12	3	1	521	57.851	4.96	4	8
FALSE	High	Master Protein	Q9H2W6	39S ribosomal protein L46, mitochondrial OS=Homo sapiens GN=MRPL46 PE=1 SV=1	0	29.8471	27.2401	6	12	6	1	279	31.685	7.05	4	8
FALSE	High	Master Protein	Q92828	Coronin-2A OS=Homo sapiens GN=CORO2A PE=2 SV=2	0	29.4289	13.7143	8	12	8	1	525	59.725	8.05	4	8
FALSE	High	Master Protein	Q86U06	Probable RNA-binding protein 23 OS=Homo sapiens GN=RBM23 PE=1 SV=1	0	28.2205	9.5672	3	12	1	1	439	48.701	9.85	4	8
FALSE	High	Master Protein	Q9UL40	Zinc finger protein 346 OS=Homo sapiens GN=ZNF346 PE=1 SV=1	0	35.885	27.2109	7	11	7	1	294	32.912	9.09	4	7
FALSE	High	Master Protein	P56192	Methionine--tRNA ligase, cytoplasmic OS=Homo sapiens GN=MARS PE=1 SV=2	0	34.4831	9.88889	8	11	8	1	900	101.052	6.16	4	7
FALSE	High	Master Protein	Q13084	39S ribosomal protein L28, mitochondrial OS=Homo sapiens GN=MRPL28 PE=1 SV=4	0	31.4183	30.0781	6	11	6	1	256	30.138	8.29	4	7
FALSE	High	Master Protein	Q9UKN8	General transcription factor 3C polypeptide 4 OS=Homo sapiens GN=GTF3C4 PE=1 SV=2	0	29.5126	11.8005	8	11	8	1	822	91.923	6.65	4	7
FALSE	High	Master Protein	A1L020	RNA-binding protein MEX3A OS=Homo sapiens GN=MEX3A PE=1 SV=1	0	24.2425	12.6923	5	11	3	1	520	54.139	7.27	4	7
FALSE	High	Master Protein	Q9BW19	Kinesin-like protein KIFC1 OS=Homo sapiens GN=KIFC1 PE=1 SV=2	0	24.2202	15.6018	8	11	8	1	673	73.702	8.98	4	7
FALSE	High	Master Protein	Q9Y295	Developmentally-regulated GTP-binding protein 1 OS=Homo sapiens GN=DRG1 PE=1 SV=1	0	22.5974	18.5286	6	11	5	1	367	40.517	8.9	4	7
FALSE	High	Master Protein	P25205	DNA replication licensing factor MCM3 OS=Homo sapiens GN=MCM3 PE=1 SV=3	0	21.2165	8.29208	7	11	7	1	808	90.924	5.77	4	7
FALSE	High	Master Protein	O60762	Dolichol-phosphate mannosyltransferase subunit 1 OS=Homo sapiens GN=DPM1 PE=1 SV=1	0	19.4631	25	6	11	6	1	260	29.616	9.57	4	7
FALSE	High	Master Protein	Q96CB9	5-methylcytosine rRNA methyltransferase NSUN4 OS=Homo sapiens GN=NSUN4 PE=1 SV=2	0	17.4331	14.0625	5	11	5	1	384	43.061	8.18	4	7
FALSE	High	Master Protein	P51665	26S proteasome non-ATPase regulatory subunit 7 OS=Homo sapiens GN=PSMD7 PE=1 SV=2	0	39.079	18.2099	5	10	5	1	324	37.002	6.77	4	6
FALSE	High	Master Protein	O15213	WD repeat-containing protein 46 OS=Homo sapiens GN=WDR46 PE=1 SV=3	0	37.4265	20.8197	9	10	9	1	610	68.029	9.67	4	6
FALSE	High	Master Protein	P11908	Ribose-phosphate pyrophosphokinase 2 OS=Homo sapiens GN=PRPS2 PE=1 SV=2	0	32.7738	16.9811	4	10	1	1	318	34.747	6.61	4	6
FALSE	High	Master Protein	O14818	Proteasome subunit alpha type-7 OS=Homo sapiens GN=PSMA7 PE=1 SV=1	0	25.9175	22.5806	5	10	5	1	248	27.87	8.46	4	6
FALSE	High	Master Protein	P50502	Hsc70-interacting protein OS=Homo sapiens GN=ST13 PE=1 SV=2	0	25.2894	15.4472	7	10	7	1	369	41.305	5.27	4	6
FALSE	High	Master Protein	P21127	Cyclin-dependent kinase 11B OS=Homo sapiens GN=CDK11B PE=1 SV=3	0	22.0007	8.93082	7	10	7	1	795	92.65	5.57	4	6
FALSE	High	Master Protein	O14879	Interferon-induced protein with tetratricopeptide repeats 3 OS=Homo sapiens GN=IFIT3 PE=1 SV=1	0	21.0592	14.0816	6	10	5	1	490	55.95	5.2	4	6
FALSE	High	Master Protein	Q9Y3C1	Nucleolar protein 16 OS=Homo sapiens GN=NOP16 PE=1 SV=2	0	16.1357	17.4157	4	10	4	1	178	21.175	9.94	4	6
FALSE	High	Master Protein	Q5T8P6	RNA-binding protein 26 OS=Homo sapiens GN=RBM26 PE=1 SV=3	0	15.4194	4.56802	6	10	4	1	1007	113.527	9.16	4	6
FALSE	High	Master Protein	Q13643	Four and a half LIM domains protein 3 OS=Homo sapiens GN=FHL3 PE=1 SV=4	0	13.2446	15	5	10	5	1	280	31.171	6.2	4	6
FALSE	High	Master Protein	O14828	Secretory carrier-associated membrane protein 3 OS=Homo sapiens GN=SCAMP3 PE=1 SV=3	0	31.477	9.79827	3	9	3	1	347	38.262	7.64	4	5
FALSE	High	Master Protein	Q9NX24	H/ACA ribonucleoprotein complex subunit 2 OS=Homo sapiens GN=NHP2 PE=1 SV=1	0	27.672	26.1438	4	9	4	1	153	17.19	8.22	4	5
FALSE	High	Master Protein	Q8WU90	Zinc finger CCCH domain-containing protein 15 OS=Homo sapiens GN=ZC3H15 PE=1 SV=1	0	24.677	16.6667	7	9	7	1	426	48.573	5.31	4	5
FALSE	High	Master Protein	Q92890	Ubiquitin fusion degradation protein 1 homolog OS=Homo sapiens GN=UFD1L PE=1 SV=3	0	24.6573	23.4528	6	9	6	1	307	34.478	6.7	4	5
FALSE	High	Master Protein	O43776	Asparagine--tRNA ligase, cytoplasmic OS=Homo sapiens GN=NARS PE=1 SV=1	0	23.4782	11.1314	5	9	5	1	548	62.903	6.25	4	5
FALSE	High	Master Protein	P40925	Malate dehydrogenase, cytoplasmic OS=Homo sapiens GN=MDH1 PE=1 SV=4	0	19.7235	14.3713	4	9	4	1	334	36.403	7.36	4	5
FALSE	High	Master Protein	P54577	Tyrosine--tRNA ligase, cytoplasmic OS=Homo sapiens GN=YARS PE=1 SV=4	0	17.3601	10.2273	6	9	6	1	528	59.106	7.05	4	5
FALSE	High	Master Protein	Q9H0U6	39S ribosomal protein L18, mitochondrial OS=Homo sapiens GN=MRPL18 PE=1 SV=1	0	17.0735	21.1111	5	9	5	1	180	20.564	9.54	4	5
FALSE	High	Master Protein	Q16851	UTP--glucose-1-phosphate uridylyltransferase OS=Homo sapiens GN=UGP2 PE=1 SV=5	0	16.7287	12.9921	7	9	7	1	508	56.905	8.15	4	5
FALSE	High	Master Protein	P11177	Pyruvate dehydrogenase E1 component subunit beta, mitochondrial OS=Homo sapiens GN=PDHB PE=1 SV=3	0	16.3368	16.156	5	9	5	1	359	39.208	6.65	4	5
FALSE	High	Master Protein	Q9UHK0	Nuclear fragile X mental retardation-interacting protein 1 OS=Homo sapiens GN=NUFIP1 PE=1 SV=2	0	15.4125	11.7172	6	9	6	1	495	56.264	9.13	4	5
FALSE	High	Master Protein	Q8N1F7	Nuclear pore complex protein Nup93 OS=Homo sapiens GN=NUP93 PE=1 SV=2	0	15.3976	6.83761	6	9	6	1	819	93.43	5.72	4	5
FALSE	High	Master Protein	Q9Y3T9	Nucleolar complex protein 2 homolog OS=Homo sapiens GN=NOC2L PE=1 SV=4	0	12.1456	3.60481	3	9	3	1	749	84.866	5.62	4	5
FALSE	High	Master Protein	Q9H2M9	Rab3 GTPase-activating protein non-catalytic subunit OS=Homo sapiens GN=RAB3GAP2 PE=1 SV=1	0.000761905	5.25601	1.29218	2	9	1	1	1393	155.886	5.62	4	5
FALSE	High	Master Protein	P49207	60S ribosomal protein L34 OS=Homo sapiens GN=RPL34 PE=1 SV=3	0.00143988	4.78839	12.8205	2	9	2	1	117	13.284	11.47	4	5
FALSE	High	Master Protein	Q3ZCQ8	Mitochondrial import inner membrane translocase subunit TIM50 OS=Homo sapiens GN=TIMM50 PE=1 SV=2	0	25.04	16.4306	5	8	5	1	353	39.622	8.37	4	4
FALSE	High	Master Protein	Q8WX92	Negative elongation factor B OS=Homo sapiens GN=NELFB PE=1 SV=1	0	24.2879	14.6552	7	8	7	1	580	65.655	6.13	4	4
FALSE	High	Master Protein	P20618	Proteasome subunit beta type-1 OS=Homo sapiens GN=PSMB1 PE=1 SV=2	0	22.2338	24.0664	5	8	5	1	241	26.472	8.13	4	4
FALSE	High	Master Protein	Q15008	26S proteasome non-ATPase regulatory subunit 6 OS=Homo sapiens GN=PSMD6 PE=1 SV=1	0	21.9894	15.1671	5	8	5	1	389	45.502	5.62	4	4
FALSE	High	Master Protein	O60488	Long-chain-fatty-acid--CoA ligase 4 OS=Homo sapiens GN=ACSL4 PE=1 SV=2	0	20.6521	8.29817	5	8	3	1	711	79.137	8.38	4	4
FALSE	High	Master Protein	Q12904	Aminoacyl tRNA synthase complex-interacting multifunctional protein 1 OS=Homo sapiens GN=AIMP1 PE=1 SV=2	0	20.3528	25.9615	6	8	6	1	312	34.331	8.43	4	4
FALSE	High	Master Protein	O43592	Exportin-T OS=Homo sapiens GN=XPOT PE=1 SV=2	0	18.9553	5.50936	5	8	5	1	962	109.893	5.39	4	4
FALSE	High	Master Protein	P19387	DNA-directed RNA polymerase II subunit RPB3 OS=Homo sapiens GN=POLR2C PE=1 SV=2	0	18.5034	16	5	8	5	1	275	31.422	4.92	4	4
FALSE	High	Master Protein	P09622	Dihydrolipoyl dehydrogenase, mitochondrial OS=Homo sapiens GN=DLD PE=1 SV=2	0	18.0119	9.82318	5	8	5	1	509	54.143	7.85	4	4
FALSE	High	Master Protein	Q8WWH5	Probable tRNA pseudouridine synthase 1 OS=Homo sapiens GN=TRUB1 PE=1 SV=1	0	16.5064	16.3324	5	8	5	1	349	37.229	8.25	4	4
FALSE	High	Master Protein	P30048	Thioredoxin-dependent peroxide reductase, mitochondrial OS=Homo sapiens GN=PRDX3 PE=1 SV=3	0	16.3932	17.1875	4	8	4	1	256	27.675	7.78	4	4
FALSE	High	Master Protein	Q9NVS2	28S ribosomal protein S18a, mitochondrial OS=Homo sapiens GN=MRPS18A PE=1 SV=1	0	16.0005	26.5306	6	8	6	1	196	22.17	10.33	4	4
FALSE	High	Master Protein	Q9NWK9	Box C/D snoRNA protein 1 OS=Homo sapiens GN=ZNHIT6 PE=1 SV=1	0	15.6131	11.7021	6	8	6	1	470	53.884	5.8	4	4
FALSE	High	Master Protein	P43246	DNA mismatch repair protein Msh2 OS=Homo sapiens GN=MSH2 PE=1 SV=1	0	14.8942	5.03212	5	8	5	1	934	104.677	5.77	4	4
FALSE	High	Master Protein	P21266	Glutathione S-transferase Mu 3 OS=Homo sapiens GN=GSTM3 PE=1 SV=3	0	14.4604	19.1111	4	8	4	1	225	26.542	5.54	4	4
FALSE	High	Master Protein	Q8TAE8	Growth arrest and DNA damage-inducible proteins-interacting protein 1 OS=Homo sapiens GN=GADD45GIP1 PE=1 SV=1	0	13.4797	19.8198	4	8	4	1	222	25.368	10.02	4	4
FALSE	High	Master Protein	Q00526	Cyclin-dependent kinase 3 OS=Homo sapiens GN=CDK3 PE=1 SV=1	0	12.6336	10.8197	3	8	1	1	305	35.024	8.79	4	4
FALSE	High	Master Protein	P00492	Hypoxanthine-guanine phosphoribosyltransferase OS=Homo sapiens GN=HPRT1 PE=1 SV=2	0	12.1059	18.8073	4	8	4	1	218	24.564	6.68	4	4
FALSE	High	Master Protein	P39748	Flap endonuclease 1 OS=Homo sapiens GN=FEN1 PE=1 SV=1	0	10.9796	8.94737	4	8	4	1	380	42.566	8.62	4	4
FALSE	High	Master Protein	P36897	TGF-beta receptor type-1 OS=Homo sapiens GN=TGFBR1 PE=1 SV=1	0	9.48397	5.5666	3	8	3	1	503	55.923	7.55	4	4
FALSE	High	Master Protein	O75525	KH domain-containing, RNA-binding, signal transduction-associated protein 3 OS=Homo sapiens GN=KHDRBS3 PE=1 SV=1	0	8.59568	4.91329	2	8	1	1	346	38.776	7.61	4	4
FALSE	High	Master Protein	P28340	DNA polymerase delta catalytic subunit OS=Homo sapiens GN=POLD1 PE=1 SV=2	0	8.05703	2.34869	3	8	2	1	1107	123.553	7.03	4	4
FALSE	High	Master Protein	Q9UJY1	Heat shock protein beta-8 OS=Homo sapiens GN=HSPB8 PE=1 SV=1	0.000761905	6.4959	14.7959	3	8	3	1	196	21.591	5.12	4	4
FALSE	High	Master Protein	P21817	Ryanodine receptor 1 OS=Homo sapiens GN=RYR1 PE=1 SV=3	0.00786449	2.77676	0.158793	1	8	1	1	5038	564.815	5.3	4	4
FALSE	High	Master Protein	Q13573	SNW domain-containing protein 1 OS=Homo sapiens GN=SNW1 PE=1 SV=1	0	26.159	9.51493	5	7	5	1	536	61.456	9.52	4	3
FALSE	High	Master Protein	O94992	Protein HEXIM1 OS=Homo sapiens GN=HEXIM1 PE=1 SV=1	0	22.2723	13.649	4	7	4	1	359	40.598	4.89	4	3
FALSE	High	Master Protein	P62333	26S protease regulatory subunit 10B OS=Homo sapiens GN=PSMC6 PE=1 SV=1	0	20.3447	13.6247	5	7	5	1	389	44.145	7.49	4	3
FALSE	High	Master Protein	P20020	Plasma membrane calcium-transporting ATPase 1 OS=Homo sapiens GN=ATP2B1 PE=1 SV=3	0	19.6891	4.61049	5	7	5	1	1258	138.668	6.04	4	3
FALSE	High	Master Protein	P24752	Acetyl-CoA acetyltransferase, mitochondrial OS=Homo sapiens GN=ACAT1 PE=1 SV=1	0	19.6308	11.7096	4	7	4	1	427	45.171	8.85	4	3
FALSE	High	Master Protein	P08133	Annexin A6 OS=Homo sapiens GN=ANXA6 PE=1 SV=3	0	19.393	9.80684	6	7	6	1	673	75.826	5.6	4	3
FALSE	High	Master Protein	P53007	Tricarboxylate transport protein, mitochondrial OS=Homo sapiens GN=SLC25A1 PE=1 SV=2	0	19.2312	18.0064	5	7	5	1	311	33.991	9.89	4	3
FALSE	High	Master Protein	P62495	Eukaryotic peptide chain release factor subunit 1 OS=Homo sapiens GN=ETF1 PE=1 SV=3	0	17.8073	9.15332	4	7	4	1	437	49	5.71	4	3
FALSE	High	Master Protein	P23368	NAD-dependent malic enzyme, mitochondrial OS=Homo sapiens GN=ME2 PE=1 SV=1	0	17.2848	9.58904	5	7	5	1	584	65.402	7.61	4	3
FALSE	High	Master Protein	P49915	GMP synthase [glutamine-hydrolyzing] OS=Homo sapiens GN=GMPS PE=1 SV=1	0	17.0791	8.08081	5	7	5	1	693	76.667	6.87	4	3
FALSE	High	Master Protein	Q15424	Scaffold attachment factor B1 OS=Homo sapiens GN=SAFB PE=1 SV=4	0	16.4236	5.46448	5	7	2	1	915	102.58	5.47	4	3
FALSE	High	Master Protein	Q06210	Glutamine--fructose-6-phosphate aminotransferase [isomerizing] 1 OS=Homo sapiens GN=GFPT1 PE=1 SV=3	0	16.3705	6.86695	4	7	4	1	699	78.756	7.11	4	3
FALSE	High	Master Protein	P62993	Growth factor receptor-bound protein 2 OS=Homo sapiens GN=GRB2 PE=1 SV=1	0	16.367	18.4332	4	7	4	1	217	25.19	6.32	4	3
FALSE	High	Master Protein	Q96QK1	Vacuolar protein sorting-associated protein 35 OS=Homo sapiens GN=VPS35 PE=1 SV=2	0	16.1612	5.40201	4	7	4	1	796	91.649	5.49	4	3
FALSE	High	Master Protein	Q9BSG0	Protease-associated domain-containing protein 1 OS=Homo sapiens GN=PRADC1 PE=1 SV=1	0	14.3586	15.9574	3	7	3	1	188	21.029	5.47	4	3
FALSE	High	Master Protein	P14324	Farnesyl pyrophosphate synthase OS=Homo sapiens GN=FDPS PE=1 SV=4	0	13.9431	11.2172	4	7	4	1	419	48.245	6.15	4	3
FALSE	High	Master Protein	Q8NAV1	Pre-mRNA-splicing factor 38A OS=Homo sapiens GN=PRPF38A PE=1 SV=1	0	13.8885	11.859	4	7	4	1	312	37.453	9.96	4	3
FALSE	High	Master Protein	Q12805	EGF-containing fibulin-like extracellular matrix protein 1 OS=Homo sapiens GN=EFEMP1 PE=1 SV=2	0	13.7279	9.33063	3	7	3	1	493	54.604	5.07	4	3
FALSE	High	Master Protein	P51858	Hepatoma-derived growth factor OS=Homo sapiens GN=HDGF PE=1 SV=1	0	13.6496	18.75	4	7	4	1	240	26.772	4.73	4	3
FALSE	High	Master Protein	Q15070	Mitochondrial inner membrane protein OXA1L OS=Homo sapiens GN=OXA1L PE=1 SV=3	0	12.3532	6.2069	3	7	3	1	435	48.516	9.45	4	3
FALSE	High	Master Protein	P05026	Sodium/potassium-transporting ATPase subunit beta-1 OS=Homo sapiens GN=ATP1B1 PE=1 SV=1	0	10.4097	8.25083	2	7	2	1	303	35.039	8.53	4	3
FALSE	High	Master Protein	P27695	DNA-(apurinic or apyrimidinic site) lyase OS=Homo sapiens GN=APEX1 PE=1 SV=2	0	9.88347	9.43396	3	7	3	1	318	35.532	8.12	4	3
FALSE	High	Master Protein	P20340	Ras-related protein Rab-6A OS=Homo sapiens GN=RAB6A PE=1 SV=3	0	9.86712	14.4231	3	7	2	1	208	23.578	5.54	4	3
FALSE	High	Master Protein	P82979	SAP domain-containing ribonucleoprotein OS=Homo sapiens GN=SARNP PE=1 SV=3	0	15.1715	27.619	5	6	5	1	210	23.656	6.42	4	2
FALSE	High	Master Protein	Q9UDY4	DnaJ homolog subfamily B member 4 OS=Homo sapiens GN=DNAJB4 PE=1 SV=1	0	14.764	17.2107	4	6	3	1	337	37.783	8.5	4	2
FALSE	High	Master Protein	Q5SRD1	Putative mitochondrial import inner membrane translocase subunit Tim23B OS=Homo sapiens GN=TIMM23B PE=5 SV=2	0	14.4985	10.5058	2	6	2	1	257	28.03	9.39	4	2
FALSE	High	Master Protein	P11172	Uridine 5'-monophosphate synthase OS=Homo sapiens GN=UMPS PE=1 SV=1	0	13.8369	9.16667	4	6	4	1	480	52.189	7.24	4	2
FALSE	High	Master Protein	P52789	Hexokinase-2 OS=Homo sapiens GN=HK2 PE=1 SV=2	0	13.8116	3.70774	3	6	2	1	917	102.313	6.05	4	2
FALSE	High	Master Protein	Q13185	Chromobox protein homolog 3 OS=Homo sapiens GN=CBX3 PE=1 SV=4	0	13.5923	19.6721	3	6	3	1	183	20.798	5.33	4	2
FALSE	High	Master Protein	Q15649	Zinc finger HIT domain-containing protein 3 OS=Homo sapiens GN=ZNHIT3 PE=1 SV=2	0	13.2471	22.5806	4	6	4	1	155	17.596	5.67	4	2
FALSE	High	Master Protein	P0CAP2	DNA-directed RNA polymerase II subunit GRINL1A OS=Homo sapiens GN=POLR2M PE=1 SV=1	0	11.8139	11.413	4	6	4	1	368	41.714	6.39	4	2
FALSE	High	Master Protein	Q14573	Inositol 1,4,5-trisphosphate receptor type 3 OS=Homo sapiens GN=ITPR3 PE=1 SV=2	0	10.523	1.34781	4	6	3	1	2671	303.912	6.48	4	2
FALSE	High	Master Protein	Q9H2P0	Activity-dependent neuroprotector homeobox protein OS=Homo sapiens GN=ADNP PE=1 SV=1	0	10.4608	3.35753	3	6	3	1	1102	123.485	7.34	4	2
FALSE	High	Master Protein	P28070	Proteasome subunit beta type-4 OS=Homo sapiens GN=PSMB4 PE=1 SV=4	0	10.14	12.5	3	6	3	1	264	29.185	5.97	4	2
FALSE	High	Master Protein	P49321	Nuclear autoantigenic sperm protein OS=Homo sapiens GN=NASP PE=1 SV=2	0	8.80171	4.06091	4	6	4	1	788	85.186	4.3	4	2
FALSE	High	Master Protein	P12004	Proliferating cell nuclear antigen OS=Homo sapiens GN=PCNA PE=1 SV=1	0.000434028	7.56757	13.0268	4	6	4	1	261	28.75	4.69	4	2
FALSE	High	Master Protein	O75449	Katanin p60 ATPase-containing subunit A1 OS=Homo sapiens GN=KATNA1 PE=1 SV=1	0.00208117	4.42899	2.44399	1	6	1	1	491	55.929	6.9	4	2
FALSE	Medium	Master Protein	Q9Y6B7	AP-4 complex subunit beta-1 OS=Homo sapiens GN=AP4B1 PE=1 SV=2	0.0437995	1.58653	0.947226	1	6	1	1	739	83.206	5.86	4	2
FALSE	High	Master Protein	P36871	Phosphoglucomutase-1 OS=Homo sapiens GN=PGM1 PE=1 SV=3	0	17.2074	10.4982	5	5	5	1	562	61.411	6.76	4	1
FALSE	High	Master Protein	Q13838	Spliceosome RNA helicase DDX39B OS=Homo sapiens GN=DDX39B PE=1 SV=1	0	16.0406	8.41121	4	5	4	1	428	48.96	5.67	4	1
FALSE	High	Master Protein	P31930	Cytochrome b-c1 complex subunit 1, mitochondrial OS=Homo sapiens GN=UQCRC1 PE=1 SV=3	0	15.7802	10.625	4	5	4	1	480	52.612	6.37	4	1
FALSE	High	Master Protein	P20339	Ras-related protein Rab-5A OS=Homo sapiens GN=RAB5A PE=1 SV=2	0	13.5868	20.4651	4	5	1	1	215	23.644	8.15	4	1
FALSE	High	Master Protein	Q9UDY8	Mucosa-associated lymphoid tissue lymphoma translocation protein 1 OS=Homo sapiens GN=MALT1 PE=1 SV=1	0	13.1706	6.43204	5	5	5	1	824	92.213	5.73	4	1
FALSE	High	Master Protein	Q9Y6Y0	Influenza virus NS1A-binding protein OS=Homo sapiens GN=IVNS1ABP PE=1 SV=3	0	12.7873	5.919	4	5	4	1	642	71.683	5.53	4	1
FALSE	High	Master Protein	P51648	Fatty aldehyde dehydrogenase OS=Homo sapiens GN=ALDH3A2 PE=1 SV=1	0	12.5973	6.39175	3	5	3	1	485	54.813	7.88	4	1
FALSE	High	Master Protein	Q96RR1	Twinkle protein, mitochondrial OS=Homo sapiens GN=PEO1 PE=1 SV=1	0	12.5752	6.72515	4	5	4	1	684	77.106	8.98	4	1
FALSE	High	Master Protein	Q12769	Nuclear pore complex protein Nup160 OS=Homo sapiens GN=NUP160 PE=1 SV=3	0	12.2548	3.55153	5	5	5	1	1436	162.017	5.5	4	1
FALSE	High	Master Protein	Q8WYP5	Protein ELYS OS=Homo sapiens GN=AHCTF1 PE=1 SV=3	0	11.3131	1.76523	4	5	4	1	2266	252.342	6.6	4	1
FALSE	High	Master Protein	Q9NTJ3	Structural maintenance of chromosomes protein 4 OS=Homo sapiens GN=SMC4 PE=1 SV=2	0	10.8342	3.64907	5	5	5	1	1288	147.091	6.79	4	1
FALSE	High	Master Protein	P11388	DNA topoisomerase 2-alpha OS=Homo sapiens GN=TOP2A PE=1 SV=3	0	9.85815	2.28609	4	5	2	1	1531	174.276	8.72	4	1
FALSE	High	Master Protein	P52594	Arf-GAP domain and FG repeat-containing protein 1 OS=Homo sapiens GN=AGFG1 PE=1 SV=2	0.000761905	6.94427	4.4484	2	5	2	1	562	58.224	8.63	4	1
FALSE	High	Master Protein	O14776	Transcription elongation regulator 1 OS=Homo sapiens GN=TCERG1 PE=1 SV=2	0.000761905	6.2886	2.18579	3	5	3	1	1098	123.823	8.65	4	1
FALSE	High	Master Protein	Q16719	Kynureninase OS=Homo sapiens GN=KYNU PE=1 SV=1	0	15.1458	5.5914	3	3	3	1	465	52.318	7.03	3
FALSE	High	Master Protein	Q7L4I2	Arginine/serine-rich coiled-coil protein 2 OS=Homo sapiens GN=RSRC2 PE=1 SV=1	0	13.3645	5.06912	2	3	2	1	434	50.529	11.33	3
FALSE	High	Master Protein	O14617	AP-3 complex subunit delta-1 OS=Homo sapiens GN=AP3D1 PE=1 SV=1	0	11.9917	4.42324	3	3	3	1	1153	130.076	8.48	3
FALSE	High	Master Protein	O95163	Elongator complex protein 1 OS=Homo sapiens GN=IKBKAP PE=1 SV=3	0	10.5844	2.02703	3	3	3	1	1332	150.159	5.94	3
FALSE	High	Master Protein	O75886	Signal transducing adapter molecule 2 OS=Homo sapiens GN=STAM2 PE=1 SV=1	0	10.32	6.28571	3	3	3	1	525	58.128	5.07	3
FALSE	High	Master Protein	O75131	Copine-3 OS=Homo sapiens GN=CPNE3 PE=1 SV=1	0	10.147	3.72439	2	3	1	1	537	60.092	5.85	3
FALSE	High	Master Protein	Q15075	Early endosome antigen 1 OS=Homo sapiens GN=EEA1 PE=1 SV=2	0	9.28175	2.33877	3	3	3	1	1411	162.367	5.68	3
FALSE	High	Master Protein	Q9UKJ3	G patch domain-containing protein 8 OS=Homo sapiens GN=GPATCH8 PE=1 SV=2	0	9.11502	2.3968	3	3	3	1	1502	164.098	8.66	3
FALSE	High	Master Protein	P38117	Electron transfer flavoprotein subunit beta OS=Homo sapiens GN=ETFB PE=1 SV=3	0	8.85925	12.1569	3	3	3	1	255	27.826	8.1	3
FALSE	High	Master Protein	Q9H4A3	Serine/threonine-protein kinase WNK1 OS=Homo sapiens GN=WNK1 PE=1 SV=2	0	8.5078	1.30143	3	3	3	1	2382	250.64	6.34	3
FALSE	High	Master Protein	Q5H9U9	Probable ATP-dependent RNA helicase DDX60-like OS=Homo sapiens GN=DDX60L PE=2 SV=2	0	8.37681	1.87573	3	3	3	1	1706	197.547	8.29	3
FALSE	High	Master Protein	P56199	Integrin alpha-1 OS=Homo sapiens GN=ITGA1 PE=1 SV=2	0	8.36059	2.62935	3	3	3	1	1179	130.765	6.29	3
FALSE	High	Master Protein	O60678	Protein arginine N-methyltransferase 3 OS=Homo sapiens GN=PRMT3 PE=1 SV=3	0	8.21331	6.21469	3	3	3	1	531	59.838	5.35	3
FALSE	High	Master Protein	O14646	Chromodomain-helicase-DNA-binding protein 1 OS=Homo sapiens GN=CHD1 PE=1 SV=2	0	8.15733	1.52047	3	3	3	1	1710	196.567	7.14	3
FALSE	High	Master Protein	Q9UPN6	Protein SCAF8 OS=Homo sapiens GN=SCAF8 PE=1 SV=1	0.000434028	7.61116	2.04563	3	3	3	1	1271	140.433	8.29	3
FALSE	High	Master Protein	Q86US8	Telomerase-binding protein EST1A OS=Homo sapiens GN=SMG6 PE=1 SV=2	0.000434028	7.55878	1.83228	3	3	3	1	1419	160.362	7.05	3
FALSE	High	Master Protein	O15357	Phosphatidylinositol 3,4,5-trisphosphate 5-phosphatase 2 OS=Homo sapiens GN=INPPL1 PE=1 SV=2	0.000761905	7.22643	2.38474	3	3	3	1	1258	138.513	6.54	3
FALSE	High	Master Protein	Q08257	Quinone oxidoreductase OS=Homo sapiens GN=CRYZ PE=1 SV=1	0.000761905	7.05465	10.0304	3	3	3	1	329	35.185	8.44	3
FALSE	High	Master Protein	Q9ULT8	E3 ubiquitin-protein ligase HECTD1 OS=Homo sapiens GN=HECTD1 PE=1 SV=3	0.000761905	6.83651	0.996169	3	3	3	1	2610	289.203	5.35	3
FALSE	High	Master Protein	Q7L8L6	FAST kinase domain-containing protein 5 OS=Homo sapiens GN=FASTKD5 PE=1 SV=1	0.000761905	6.62891	3.79581	3	3	3	1	764	86.519	8.13	3
FALSE	High	Master Protein	Q9HAU5	Regulator of nonsense transcripts 2 OS=Homo sapiens GN=UPF2 PE=1 SV=1	0.000761905	5.8872	1.88679	3	3	3	1	1272	147.717	5.69	3
FALSE	Medium	Master Protein	Q96QD8	Sodium-coupled neutral amino acid transporter 2 OS=Homo sapiens GN=SLC38A2 PE=1 SV=2	0.0429253	1.59998	1.3834	1	3	1	1	506	55.99	8	3
FALSE	High	Master Protein	O95425	Supervillin OS=Homo sapiens GN=SVIL PE=1 SV=2	0	287.562	29.178	48	71	48	1	2214	247.593	6.98	3	68
FALSE	High	Master Protein	Q14980	Nuclear mitotic apparatus protein 1 OS=Homo sapiens GN=NUMA1 PE=1 SV=2	0	150.129	19.6217	36	42	36	1	2115	238.115	5.78	3	39
FALSE	High	Master Protein	Q8N556	Actin filament-associated protein 1 OS=Homo sapiens GN=AFAP1 PE=1 SV=2	0	104.89	27.5342	21	39	19	1	730	80.675	8.68	3	36
FALSE	High	Master Protein	Q9ULV0	Unconventional myosin-Vb OS=Homo sapiens GN=MYO5B PE=1 SV=3	0	97.036	15.3139	25	30	22	1	1848	213.538	7.2	3	27
FALSE	High	Master Protein	Q00403	Transcription initiation factor IIB OS=Homo sapiens GN=GTF2B PE=1 SV=1	0	108.43	65.1899	19	25	19	1	316	34.811	8.35	3	22
FALSE	High	Master Protein	Q6PK04	Coiled-coil domain-containing protein 137 OS=Homo sapiens GN=CCDC137 PE=1 SV=1	0	63.5612	34.2561	8	22	8	1	289	33.211	10.93	3	19
FALSE	High	Master Protein	P40937	Replication factor C subunit 5 OS=Homo sapiens GN=RFC5 PE=1 SV=1	0	70.7278	45.2941	13	21	13	1	340	38.472	7.2	3	18
FALSE	High	Master Protein	P07948	Tyrosine-protein kinase Lyn OS=Homo sapiens GN=LYN PE=1 SV=3	0	42.6078	24.2188	11	20	9	1	512	58.537	7.11	3	17
FALSE	High	Master Protein	Q27J81	Inverted formin-2 OS=Homo sapiens GN=INF2 PE=1 SV=2	0	61.4463	17.0536	17	19	17	1	1249	135.54	5.38	3	16
FALSE	High	Master Protein	Q14160	Protein scribble homolog OS=Homo sapiens GN=SCRIB PE=1 SV=4	0	52.4753	11.1656	15	19	15	1	1630	174.778	5.07	3	16
FALSE	High	Master Protein	Q8N3X1	Formin-binding protein 4 OS=Homo sapiens GN=FNBP4 PE=1 SV=3	0	55.7433	15.3392	13	18	13	1	1017	110.198	4.74	3	15
FALSE	High	Master Protein	O15144	Actin-related protein 2/3 complex subunit 2 OS=Homo sapiens GN=ARPC2 PE=1 SV=1	0	42.3136	35	11	18	11	1	300	34.311	7.36	3	15
FALSE	High	Master Protein	Q9Y512	Sorting and assembly machinery component 50 homolog OS=Homo sapiens GN=SAMM50 PE=1 SV=3	0	43.4514	26.8657	11	16	11	1	469	51.943	6.9	3	13
FALSE	High	Master Protein	P09497	Clathrin light chain B OS=Homo sapiens GN=CLTB PE=1 SV=1	0	35.948	23.5808	10	16	10	1	229	25.175	4.64	3	13
FALSE	High	Master Protein	Q9HAV0	Guanine nucleotide-binding protein subunit beta-4 OS=Homo sapiens GN=GNB4 PE=1 SV=3	0	32.7774	21.7647	7	16	4	1	340	37.543	6	3	13
FALSE	High	Master Protein	Q6NZI2	Polymerase I and transcript release factor OS=Homo sapiens GN=PTRF PE=1 SV=1	0	36.9072	18.4615	9	14	9	1	390	43.45	5.6	3	11
FALSE	High	Master Protein	O43709	Probable 18S rRNA (guanine-N(7))-methyltransferase OS=Homo sapiens GN=WBSCR22 PE=1 SV=2	0	32.8996	24.1993	6	14	6	1	281	31.86	8.73	3	11
FALSE	High	Master Protein	Q8IYB7	DIS3-like exonuclease 2 OS=Homo sapiens GN=DIS3L2 PE=1 SV=4	0	27.7803	9.71751	10	14	10	1	885	99.216	6.1	3	11
FALSE	High	Master Protein	Q9H6F5	Coiled-coil domain-containing protein 86 OS=Homo sapiens GN=CCDC86 PE=1 SV=1	0	25.3645	22.2222	6	13	6	1	360	40.211	10.33	3	10
FALSE	High	Master Protein	Q9H8V3	Protein ECT2 OS=Homo sapiens GN=ECT2 PE=1 SV=4	0	36.9007	10.1751	7	12	7	1	914	103.439	7.71	3	9
FALSE	High	Master Protein	Q96GQ7	Probable ATP-dependent RNA helicase DDX27 OS=Homo sapiens GN=DDX27 PE=1 SV=2	0	29.1665	10.5528	8	12	8	1	796	89.779	9.28	3	9
FALSE	High	Master Protein	Q8IUH3	RNA-binding protein 45 OS=Homo sapiens GN=RBM45 PE=1 SV=1	0	26.5571	15.3361	7	12	7	1	476	53.469	7.17	3	9
FALSE	High	Master Protein	O60231	Putative pre-mRNA-splicing factor ATP-dependent RNA helicase DHX16 OS=Homo sapiens GN=DHX16 PE=1 SV=2	0	25.6382	5.95581	6	12	5	1	1041	119.189	6.8	3	9
FALSE	High	Master Protein	Q86YZ3	Hornerin OS=Homo sapiens GN=HRNR PE=1 SV=2	0	23.7138	6.59649	5	12	5	1	2850	282.228	10.04	3	9
FALSE	High	Master Protein	Q8IY81	pre-rRNA processing protein FTSJ3 OS=Homo sapiens GN=FTSJ3 PE=1 SV=2	0	36.6291	8.61865	8	11	8	1	847	96.499	8.4	3	8
FALSE	High	Master Protein	Q52LJ0	Protein FAM98B OS=Homo sapiens GN=FAM98B PE=1 SV=1	0	35.9685	17.5758	5	11	3	1	330	37.167	6.29	3	8
FALSE	High	Master Protein	P82664	28S ribosomal protein S10, mitochondrial OS=Homo sapiens GN=MRPS10 PE=1 SV=2	0	30.8027	27.3632	5	11	5	1	201	22.985	8	3	8
FALSE	High	Master Protein	Q9NZM5	Glioma tumor suppressor candidate region gene 2 protein OS=Homo sapiens GN=GLTSCR2 PE=1 SV=2	0	30.0418	16.7364	8	11	8	1	478	54.356	10.32	3	8
FALSE	High	Master Protein	Q15014	Mortality factor 4-like protein 2 OS=Homo sapiens GN=MORF4L2 PE=1 SV=1	0	24.6739	23.2639	6	11	6	1	288	32.288	9.72	3	8
FALSE	High	Master Protein	Q9H7H0	Methyltransferase-like protein 17, mitochondrial OS=Homo sapiens GN=METTL17 PE=1 SV=1	0	24.6203	18.2018	7	11	7	1	456	50.701	9.33	3	8
FALSE	High	Master Protein	Q9Y5Q8	General transcription factor 3C polypeptide 5 OS=Homo sapiens GN=GTF3C5 PE=1 SV=2	0	24.5965	18.8825	9	11	9	1	519	59.533	6.9	3	8
FALSE	High	Master Protein	Q9Y5Q9	General transcription factor 3C polypeptide 3 OS=Homo sapiens GN=GTF3C3 PE=1 SV=1	0	23.9761	8.01354	7	11	7	1	886	101.208	5.07	3	8
FALSE	High	Master Protein	Q9NVV4	Poly(A) RNA polymerase, mitochondrial OS=Homo sapiens GN=MTPAP PE=1 SV=1	0	23.5066	14.6048	8	11	8	1	582	66.13	9.04	3	8
FALSE	High	Master Protein	Q99460	26S proteasome non-ATPase regulatory subunit 1 OS=Homo sapiens GN=PSMD1 PE=1 SV=2	0	22.8807	7.97482	7	11	7	1	953	105.769	5.39	3	8
FALSE	High	Master Protein	Q9NRM2	Zinc finger protein 277 OS=Homo sapiens GN=ZNF277 PE=1 SV=2	0.000761905	6.94359	7.11111	4	11	3	1	450	52.754	5.34	3	8
FALSE	High	Master Protein	P54886	Delta-1-pyrroline-5-carboxylate synthase OS=Homo sapiens GN=ALDH18A1 PE=1 SV=2	0	31.0201	12.2013	8	10	8	1	795	87.248	7.12	3	7
FALSE	High	Master Protein	O00566	U3 small nucleolar ribonucleoprotein protein MPP10 OS=Homo sapiens GN=MPHOSPH10 PE=1 SV=2	0	27.207	10.8664	6	10	6	1	681	78.816	4.86	3	7
FALSE	High	Master Protein	Q7KZI7	Serine/threonine-protein kinase MARK2 OS=Homo sapiens GN=MARK2 PE=1 SV=2	0	23.6984	9.89848	8	10	6	1	788	87.856	9.72	3	7
FALSE	High	Master Protein	P30419	Glycylpeptide N-tetradecanoyltransferase 1 OS=Homo sapiens GN=NMT1 PE=1 SV=2	0	22.3398	15.5242	6	10	6	1	496	56.77	7.8	3	7
FALSE	High	Master Protein	P78345	Ribonuclease P protein subunit p38 OS=Homo sapiens GN=RPP38 PE=1 SV=2	0	21.5747	21.5548	6	10	6	1	283	31.815	9.92	3	7
FALSE	High	Master Protein	O95084	Serine protease 23 OS=Homo sapiens GN=PRSS23 PE=1 SV=1	0	18.1656	15.1436	5	10	5	1	383	42.974	9.42	3	7
FALSE	High	Master Protein	Q9Y4C2	TRPM8 channel-associated factor 1 OS=Homo sapiens GN=TCAF1 PE=1 SV=3	0	16.0532	5.97177	6	10	6	1	921	102.061	6.54	3	7
FALSE	High	Master Protein	Q9HB71	Calcyclin-binding protein OS=Homo sapiens GN=CACYBP PE=1 SV=2	0	34.353	28.5088	5	9	5	1	228	26.194	8.25	3	6
FALSE	High	Master Protein	Q9H694	Protein bicaudal C homolog 1 OS=Homo sapiens GN=BICC1 PE=1 SV=2	0	27.012	8.41889	7	9	7	1	974	104.778	8.54	3	6
FALSE	High	Master Protein	P28288	ATP-binding cassette sub-family D member 3 OS=Homo sapiens GN=ABCD3 PE=1 SV=1	0	26.0848	10.9256	6	9	6	1	659	75.428	9.36	3	6
FALSE	High	Master Protein	P56537	Eukaryotic translation initiation factor 6 OS=Homo sapiens GN=EIF6 PE=1 SV=1	0	26.0297	22.8571	4	9	4	1	245	26.582	4.68	3	6
FALSE	High	Master Protein	Q9Y617	Phosphoserine aminotransferase OS=Homo sapiens GN=PSAT1 PE=1 SV=2	0	25.3582	17.5676	6	9	6	1	370	40.397	7.66	3	6
FALSE	High	Master Protein	Q9UN81	LINE-1 retrotransposable element ORF1 protein OS=Homo sapiens GN=L1RE1 PE=1 SV=1	0	24.0891	16.2722	6	9	6	1	338	40.031	9.51	3	6
FALSE	High	Master Protein	P00367	Glutamate dehydrogenase 1, mitochondrial OS=Homo sapiens GN=GLUD1 PE=1 SV=2	0	23.1411	12.9032	6	9	6	1	558	61.359	7.8	3	6
FALSE	High	Master Protein	Q8NI36	WD repeat-containing protein 36 OS=Homo sapiens GN=WDR36 PE=1 SV=1	0	22.5603	7.04522	6	9	6	1	951	105.255	7.53	3	6
FALSE	High	Master Protein	Q9Y5J1	U3 small nucleolar RNA-associated protein 18 homolog OS=Homo sapiens GN=UTP18 PE=1 SV=3	0	22.3374	9.89209	5	9	5	1	556	61.964	8.76	3	6
FALSE	High	Master Protein	Q13617	Cullin-2 OS=Homo sapiens GN=CUL2 PE=1 SV=2	0	20.9108	7.65101	5	9	5	1	745	86.927	6.92	3	6
FALSE	High	Master Protein	Q9Y4C8	Probable RNA-binding protein 19 OS=Homo sapiens GN=RBM19 PE=1 SV=3	0	20.5101	5.52083	6	9	6	1	960	107.265	6.54	3	6
FALSE	High	Master Protein	P20700	Lamin-B1 OS=Homo sapiens GN=LMNB1 PE=1 SV=2	0	16.7701	11.4334	7	9	5	1	586	66.368	5.16	3	6
FALSE	High	Master Protein	P55084	Trifunctional enzyme subunit beta, mitochondrial OS=Homo sapiens GN=HADHB PE=1 SV=3	0	16.7455	9.70464	5	9	5	1	474	51.262	9.41	3	6
FALSE	High	Master Protein	P13804	Electron transfer flavoprotein subunit alpha, mitochondrial OS=Homo sapiens GN=ETFA PE=1 SV=1	0	13.7687	16.2162	4	9	4	1	333	35.058	8.38	3	6
FALSE	High	Master Protein	O94905	Erlin-2 OS=Homo sapiens GN=ERLIN2 PE=1 SV=1	0	11.301	9.14454	3	9	1	1	339	37.815	5.62	3	6
FALSE	High	Master Protein	O75477	Erlin-1 OS=Homo sapiens GN=ERLIN1 PE=1 SV=1	0	10.6376	11.5607	4	9	2	1	346	38.901	7.87	3	6
FALSE	Medium	Master Protein	Q8NAB2	Kelch repeat and BTB domain-containing protein 3 OS=Homo sapiens GN=KBTBD3 PE=2 SV=2	0.0352909	1.67531	1.15132	1	9	1	1	608	69.35	5.39	3	6
FALSE	High	Master Protein	Q6Y7W6	PERQ amino acid-rich with GYF domain-containing protein 2 OS=Homo sapiens GN=GIGYF2 PE=1 SV=1	0	30.8813	7.3903	6	8	6	1	1299	149.978	5.54	3	5
FALSE	High	Master Protein	Q96DI7	U5 small nuclear ribonucleoprotein 40 kDa protein OS=Homo sapiens GN=SNRNP40 PE=1 SV=1	0	29.4032	33.0532	7	8	7	1	357	39.286	8.1	3	5
FALSE	High	Master Protein	O00505	Importin subunit alpha-4 OS=Homo sapiens GN=KPNA3 PE=1 SV=2	0	25.3129	9.98081	5	8	2	1	521	57.775	4.94	3	5
FALSE	High	Master Protein	Q16401	26S proteasome non-ATPase regulatory subunit 5 OS=Homo sapiens GN=PSMD5 PE=1 SV=3	0	23.2274	13.6905	6	8	6	1	504	56.16	5.48	3	5
FALSE	High	Master Protein	Q9NX20	39S ribosomal protein L16, mitochondrial OS=Homo sapiens GN=MRPL16 PE=1 SV=1	0	22.2416	18.7251	5	8	5	1	251	28.431	10.13	3	5
FALSE	High	Master Protein	P35221	Catenin alpha-1 OS=Homo sapiens GN=CTNNA1 PE=1 SV=1	0	21.3851	9.16115	7	8	7	1	906	100.009	6.29	3	5
FALSE	High	Master Protein	O95602	DNA-directed RNA polymerase I subunit RPA1 OS=Homo sapiens GN=POLR1A PE=1 SV=2	0	21.1395	3.89535	7	8	7	1	1720	194.687	7.03	3	5
FALSE	High	Master Protein	Q9P2J5	Leucine--tRNA ligase, cytoplasmic OS=Homo sapiens GN=LARS PE=1 SV=2	0	20.6271	5.95238	7	8	7	1	1176	134.379	7.3	3	5
FALSE	High	Master Protein	Q9UER7	Death domain-associated protein 6 OS=Homo sapiens GN=DAXX PE=1 SV=2	0	16.5389	6.21622	4	8	4	1	740	81.323	4.87	3	5
FALSE	High	Master Protein	Q86XP3	ATP-dependent RNA helicase DDX42 OS=Homo sapiens GN=DDX42 PE=1 SV=1	0	15.2324	5.01066	6	8	6	1	938	102.912	7.02	3	5
FALSE	High	Master Protein	Q03252	Lamin-B2 OS=Homo sapiens GN=LMNB2 PE=1 SV=4	0	12.6396	8.70968	5	8	3	1	620	69.906	5.59	3	5
FALSE	High	Master Protein	Q99496	E3 ubiquitin-protein ligase RING2 OS=Homo sapiens GN=RNF2 PE=1 SV=1	0	12.2333	9.52381	3	8	2	1	336	37.632	6.84	3	5
FALSE	High	Master Protein	P39019	40S ribosomal protein S19 OS=Homo sapiens GN=RPS19 PE=1 SV=2	0	10.3542	24.8276	4	8	4	1	145	16.051	10.32	3	5
FALSE	High	Master Protein	P11802	Cyclin-dependent kinase 4 OS=Homo sapiens GN=CDK4 PE=1 SV=2	0	10.2032	17.4917	4	8	3	1	303	33.708	7.01	3	5
FALSE	High	Master Protein	P43307	Translocon-associated protein subunit alpha OS=Homo sapiens GN=SSR1 PE=1 SV=3	0	7.91229	11.8881	3	8	3	1	286	32.215	4.49	3	5
FALSE	High	Master Protein	P81605	Dermcidin OS=Homo sapiens GN=DCD PE=1 SV=2	0.000761905	7.07228	22.7273	2	8	2	1	110	11.277	6.54	3	5
FALSE	High	Master Protein	Q9UI10	Translation initiation factor eIF-2B subunit delta OS=Homo sapiens GN=EIF2B4 PE=1 SV=2	0	23.249	12.0459	4	7	4	1	523	57.521	9.38	3	4
FALSE	High	Master Protein	Q96T21	Selenocysteine insertion sequence-binding protein 2 OS=Homo sapiens GN=SECISBP2 PE=1 SV=2	0	21.7039	8.31382	6	7	6	1	854	95.402	8.12	3	4
FALSE	High	Master Protein	Q99567	Nuclear pore complex protein Nup88 OS=Homo sapiens GN=NUP88 PE=1 SV=2	0	18.6289	10.3914	5	7	5	1	741	83.489	5.69	3	4
FALSE	High	Master Protein	Q9Y2S7	Polymerase delta-interacting protein 2 OS=Homo sapiens GN=POLDIP2 PE=1 SV=1	0	18.4672	14.6739	5	7	5	1	368	42.007	8.63	3	4
FALSE	High	Master Protein	P55786	Puromycin-sensitive aminopeptidase OS=Homo sapiens GN=NPEPPS PE=1 SV=2	0	18.1552	7.61697	7	7	7	1	919	103.211	5.72	3	4
FALSE	High	Master Protein	O60333	Kinesin-like protein KIF1B OS=Homo sapiens GN=KIF1B PE=1 SV=5	0	18.0233	3.5793	6	7	4	1	1816	204.349	5.6	3	4
FALSE	High	Master Protein	Q9H583	HEAT repeat-containing protein 1 OS=Homo sapiens GN=HEATR1 PE=1 SV=3	0	17.7282	2.84515	6	7	6	1	2144	242.215	6.54	3	4
FALSE	High	Master Protein	Q9NP72	Ras-related protein Rab-18 OS=Homo sapiens GN=RAB18 PE=1 SV=1	0	17.5312	22.8155	4	7	4	1	206	22.963	5.24	3	4
FALSE	High	Master Protein	Q92567	Protein FAM168A OS=Homo sapiens GN=FAM168A PE=1 SV=2	0	16.8341	20.4918	4	7	4	1	244	26.168	8.98	3	4
FALSE	High	Master Protein	Q8N5P1	Zinc finger CCCH domain-containing protein 8 OS=Homo sapiens GN=ZC3H8 PE=1 SV=2	0	16.5262	17.5258	4	7	4	1	291	33.554	8.28	3	4
FALSE	High	Master Protein	Q9HA64	Ketosamine-3-kinase OS=Homo sapiens GN=FN3KRP PE=1 SV=2	0	15.7693	11.0032	3	7	3	1	309	34.39	7.33	3	4
FALSE	High	Master Protein	Q9H9B4	Sideroflexin-1 OS=Homo sapiens GN=SFXN1 PE=1 SV=4	0	15.321	13.6646	4	7	3	1	322	35.596	9.07	3	4
FALSE	High	Master Protein	P27797	Calreticulin OS=Homo sapiens GN=CALR PE=1 SV=1	0	14.702	7.67386	4	7	4	1	417	48.112	4.44	3	4
FALSE	High	Master Protein	P26358	DNA (cytosine-5)-methyltransferase 1 OS=Homo sapiens GN=DNMT1 PE=1 SV=2	0	14.1364	3.58911	6	7	6	1	1616	183.05	7.75	3	4
FALSE	High	Master Protein	Q9Y5K5	Ubiquitin carboxyl-terminal hydrolase isozyme L5 OS=Homo sapiens GN=UCHL5 PE=1 SV=3	0	14.1236	13.3739	4	7	4	1	329	37.583	5.33	3	4
FALSE	High	Master Protein	Q93009	Ubiquitin carboxyl-terminal hydrolase 7 OS=Homo sapiens GN=USP7 PE=1 SV=2	0	13.1619	4.53721	5	7	5	1	1102	128.22	5.55	3	4
FALSE	High	Master Protein	Q9Y4B5	Microtubule cross-linking factor 1 OS=Homo sapiens GN=MTCL1 PE=1 SV=5	0	13.1511	2.3622	4	7	2	1	1905	209.397	6.43	3	4
FALSE	High	Master Protein	Q9NP92	28S ribosomal protein S30, mitochondrial OS=Homo sapiens GN=MRPS30 PE=1 SV=2	0	12.8614	10.2506	4	7	4	1	439	50.333	7.97	3	4
FALSE	High	Master Protein	Q06265	Exosome complex component RRP45 OS=Homo sapiens GN=EXOSC9 PE=1 SV=3	0	12.4543	7.0615	3	7	3	1	439	48.918	5.29	3	4
FALSE	High	Master Protein	Q9UBR2	Cathepsin Z OS=Homo sapiens GN=CTSZ PE=1 SV=1	0	12.1735	10.5611	3	7	3	1	303	33.846	7.11	3	4
FALSE	High	Master Protein	P00533	Epidermal growth factor receptor OS=Homo sapiens GN=EGFR PE=1 SV=2	0	12.0965	3.30579	4	7	4	1	1210	134.19	6.68	3	4
FALSE	High	Master Protein	P28072	Proteasome subunit beta type-6 OS=Homo sapiens GN=PSMB6 PE=1 SV=4	0	11.6107	12.9707	3	7	3	1	239	25.341	4.92	3	4
FALSE	High	Master Protein	Q14192	Four and a half LIM domains protein 2 OS=Homo sapiens GN=FHL2 PE=1 SV=3	0	10.9615	10.3943	3	7	3	1	279	32.171	7.55	3	4
FALSE	High	Master Protein	Q8NC51	Plasminogen activator inhibitor 1 RNA-binding protein OS=Homo sapiens GN=SERBP1 PE=1 SV=2	0	10.4405	15.9314	5	7	5	1	408	44.938	8.65	3	4
FALSE	High	Master Protein	Q9NWB6	Arginine and glutamate-rich protein 1 OS=Homo sapiens GN=ARGLU1 PE=1 SV=1	0	9.43685	13.1868	4	7	4	1	273	33.197	10.35	3	4
FALSE	High	Master Protein	P21283	V-type proton ATPase subunit C 1 OS=Homo sapiens GN=ATP6V1C1 PE=1 SV=4	0	8.23577	8.37696	4	7	4	1	382	43.914	7.46	3	4
FALSE	High	Master Protein	P62318	Small nuclear ribonucleoprotein Sm D3 OS=Homo sapiens GN=SNRPD3 PE=1 SV=1	0.000761905	6.05951	15.0794	2	7	2	1	126	13.907	10.32	3	4
FALSE	High	Master Protein	P42167	Lamina-associated polypeptide 2, isoforms beta/gamma OS=Homo sapiens GN=TMPO PE=1 SV=2	0.00110742	4.89432	4.84581	2	7	1	1	454	50.639	9.38	3	4
FALSE	High	Master Protein	P28331	NADH-ubiquinone oxidoreductase 75 kDa subunit, mitochondrial OS=Homo sapiens GN=NDUFS1 PE=1 SV=3	0	19.5223	7.42779	4	6	4	1	727	79.417	6.23	3	3
FALSE	High	Master Protein	O00232	26S proteasome non-ATPase regulatory subunit 12 OS=Homo sapiens GN=PSMD12 PE=1 SV=3	0	18.4385	7.45614	3	6	3	1	456	52.871	7.65	3	3
FALSE	High	Master Protein	P54727	UV excision repair protein RAD23 homolog B OS=Homo sapiens GN=RAD23B PE=1 SV=1	0	18.4313	9.53545	3	6	3	1	409	43.145	4.84	3	3
FALSE	High	Master Protein	Q9NZJ7	Mitochondrial carrier homolog 1 OS=Homo sapiens GN=MTCH1 PE=1 SV=1	0	17.9299	8.48329	3	6	3	1	389	41.517	9.32	3	3
FALSE	High	Master Protein	Q5T280	Putative methyltransferase C9orf114 OS=Homo sapiens GN=C9orf114 PE=1 SV=3	0	17.0737	13.2979	5	6	5	1	376	41.982	7.43	3	3
FALSE	High	Master Protein	Q9BXJ9	N-alpha-acetyltransferase 15, NatA auxiliary subunit OS=Homo sapiens GN=NAA15 PE=1 SV=1	0	17.0222	6.00462	5	6	5	1	866	101.208	7.42	3	3
FALSE	High	Master Protein	O60701	UDP-glucose 6-dehydrogenase OS=Homo sapiens GN=UGDH PE=1 SV=1	0	17.0035	9.31174	4	6	4	1	494	54.989	7.12	3	3
FALSE	High	Master Protein	Q15633	RISC-loading complex subunit TARBP2 OS=Homo sapiens GN=TARBP2 PE=1 SV=3	0	16.8671	14.7541	5	6	5	1	366	39.015	6.54	3	3
[truncated: 1,298 more rows]
