# Supplementary material for: α-/γ-Taxilin are required for centriolar subdistal appendage assembly and microtubule organization
Source: eLife journal article supplement (doi:10.7554/elife.73252), 2022-01-19

**Figure 1-figure supplement 2B**

$\alpha$ -Taxilin

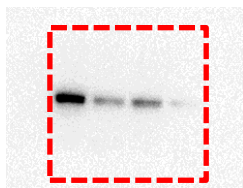

GAPDH

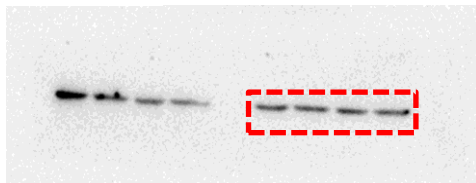

**Figure 1-figure supplement 2C**

$\gamma$ -Taxilin

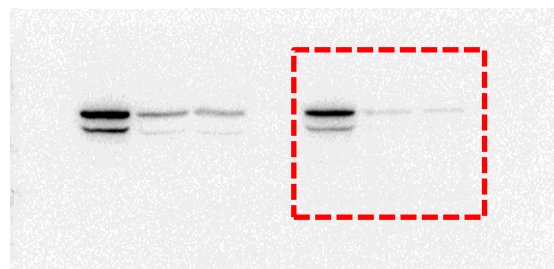

GAPDH

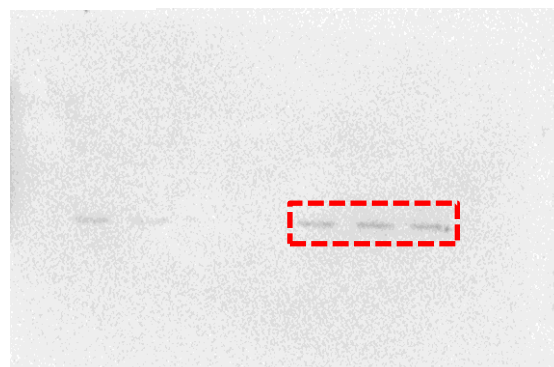

**Figure 1-figure supplement 2E**

HA

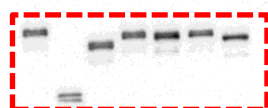

GAPDH

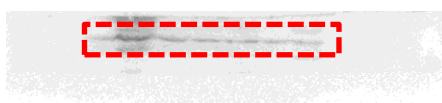

**Figure 1-figure supplement 2F**

GFP

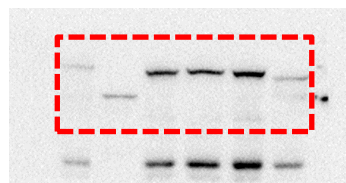

GAPDH

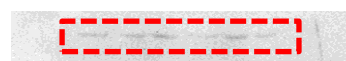

Supplement: fig1-figsupp2-data1 [file Labeled immuoblots for Figure 1-figure supplement 2.pdf › Figure 1-figure supplement 2-source data 1/Labeled immuoblots for Figure 1-figure supplement 2.pdf]
