# Supplementary material for: α-/γ-Taxilin are required for centriolar subdistal appendage assembly and microtubule organization
Source: eLife journal article supplement (doi:10.7554/elife.73252), 2022-01-19

**Figure 3A**

ODF2

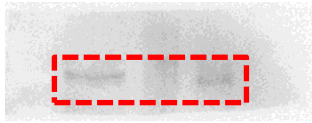

$\alpha$ -Taxilin

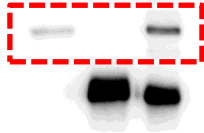

**Figure 3B**

ODF2

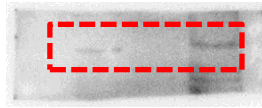

$\gamma$ -Taxilin

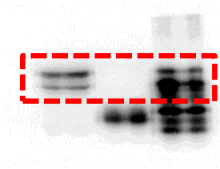

**Figure 3E**

$\alpha$ -Taxilin

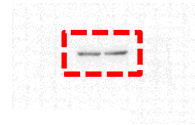

$\gamma$ -Taxilin

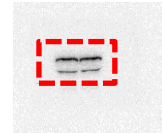

ODF2

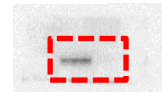

GAPDH

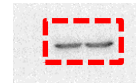

Supplement: fig3-data3 [file elife-73252-fig3-data3-v1.zip]
