# Supplementary material for: α-/γ-Taxilin are required for centriolar subdistal appendage assembly and microtubule organization
Source: eLife journal article supplement (doi:10.7554/elife.73252), 2022-01-19

**Figure 3-Figure supplement 1G**

$\alpha$ -Taxilin-HA

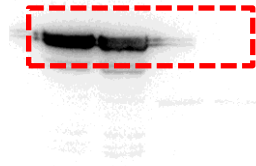

CCDC68-V5

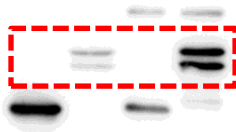

**Figure 3-Figure supplement 1H**

$\alpha$ -Taxilin-HA

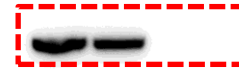

CCDC120-GFP

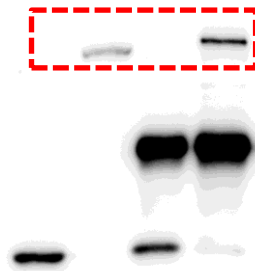

**Figure 3-Figure supplement 1I**

CCDC68-V5

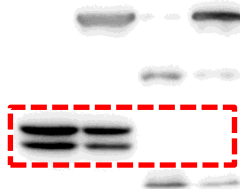

3 $\times$ FLAG- $\gamma$ -Taxilin

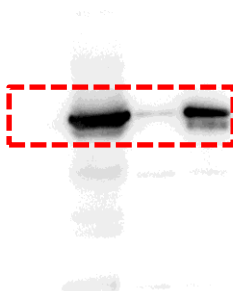

**Figure 3-Figure supplement 1J**

CCDC120-GFP

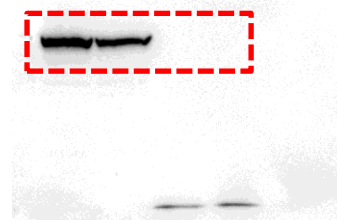

3 $\times$ FLAG- $\gamma$ -Taxilin

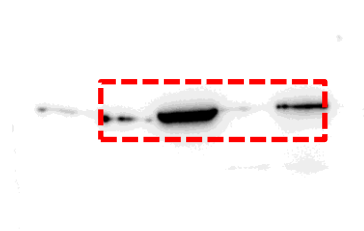

**Figure 3-Figure supplement 1K**

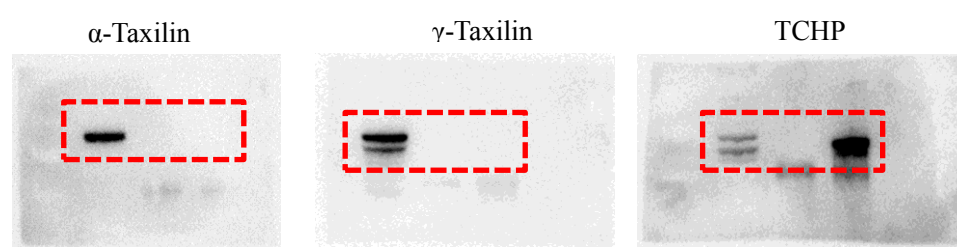

Supplement: fig3-figsupp1-data7 [file elife-73252-fig3-figsupp1-data7-v1.zip]
