# Supplementary material for: α-/γ-Taxilin are required for centriolar subdistal appendage assembly and microtubule organization
Source: eLife. 2022 Feb 4;11:e73252. doi: 10.7554/eLife.73252 (PMC8816381; doi:10.7554/eLife.73252)
Supplement: Figure 1—figure supplement 1—source data 1. [file elife-73252-fig1-figsupp1-data1.zip]

Archive with 5 entries (3 files):
- Figure 1-figure supplement 1-source data 1/
- Figure 1-figure supplement 1-source data 1/labeled immuoblots for Figure 1-figure supplement 1.pdf
- Figure 1-figure supplement 1-source data 1/Unlabeled immunoblots/
- Figure 1-figure supplement 1-source data 1/Unlabeled immunoblots/ccdc120-v5-biotin-10 min-Figure 1-figure supplement 1D.Tif
- Figure 1-figure supplement 1-source data 1/Unlabeled immunoblots/CCDC68-5 ul-biotin-Figure 1-figure supplement 1C.Tif
