# Supplementary figures and images for: α-/γ-Taxilin are required for centriolar subdistal appendage assembly and microtubule organization
Source: eLife journal article supplement (doi:10.7554/elife.73252), 2022-01-19

**Figure 1-figure supplement 1C**

Biotin

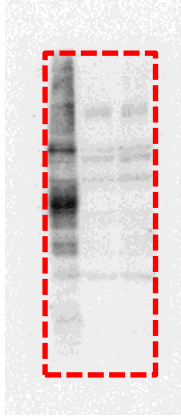

**Figure 1-figure supplement 1D**

Biotin

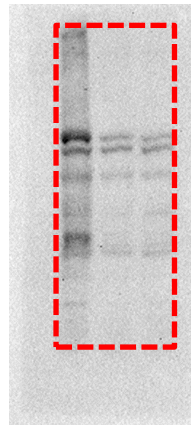

Supplement: fig1-figsupp1-data1 [file elife-73252-fig1-figsupp1-data1-v1.zip]

**Figure 4A**

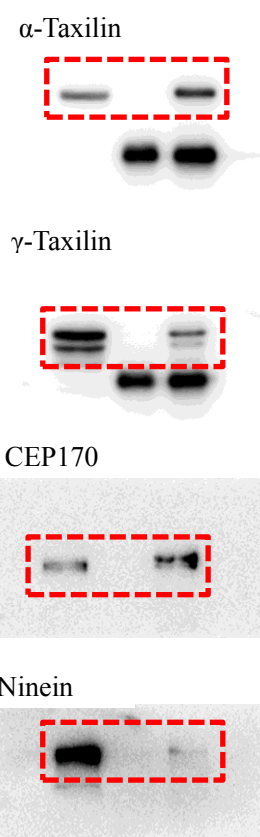

**Figure 4B**

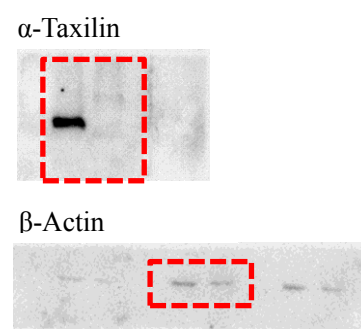

**Figure 4C**

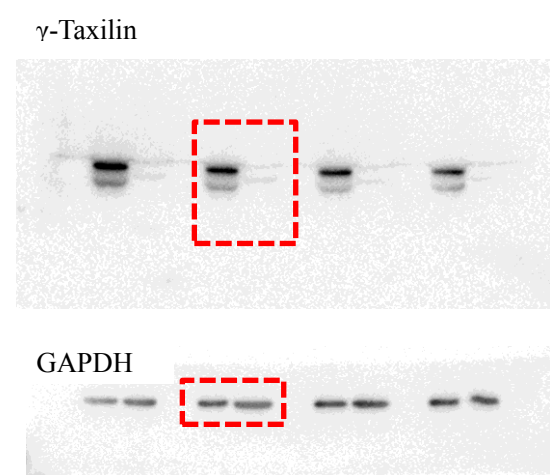

**Figure 4F**

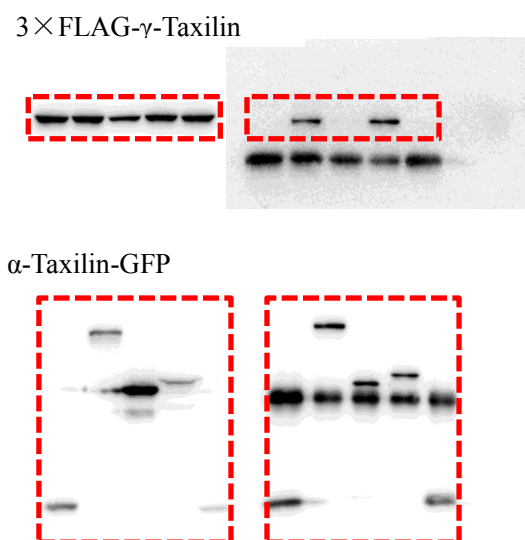

**Figure 4I**

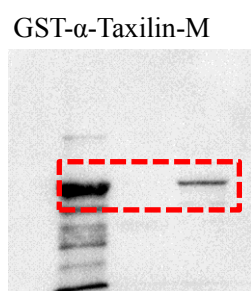

**Figure 4H**

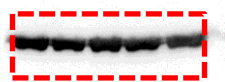

3×FLAG- $\alpha$ -Taxilin-IP

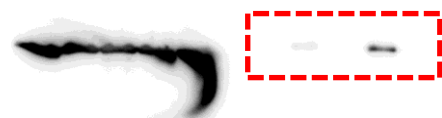

GFP- $\gamma$ -Taxilin

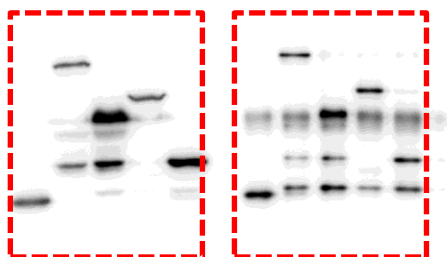

Supplement: fig4-data3 [file Labeled immuoblots for Figure 4.pdf › Figure 4-source data 3/Labeled immuoblots for Figure 4.pdf]

**Figure 5C**

3 × FLAG-CEP170

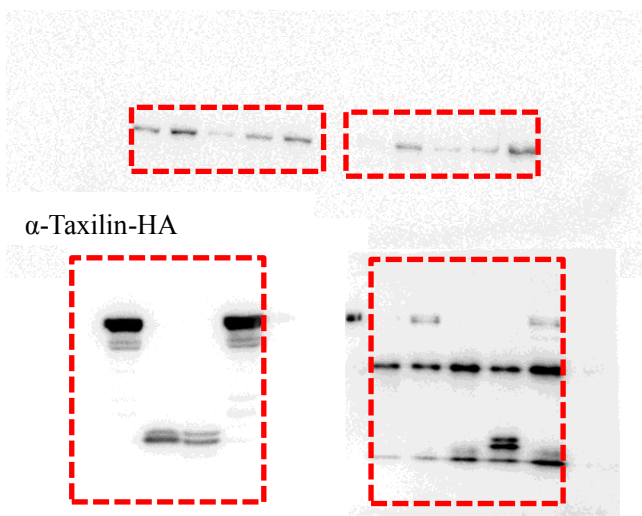

**Figure 5D**

3 × FLAG-CEP170

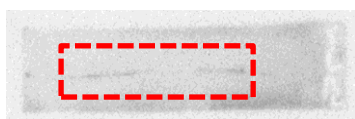

Supplement: fig5-data2 [file Labeled immuoblots for Figure 5.pdf › Figure 5-source data 2/Labeled immuoblots for Figure 5.pdf]

**Figure 7A**

$\alpha$ -Taxilin

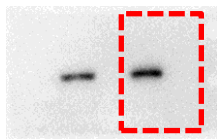

GAPDH

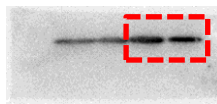

**Figure 7B**

$\gamma$ -Taxilin

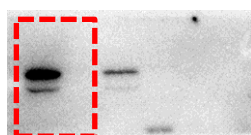

GAPDH

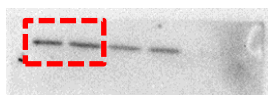

Supplement: fig7-data4 [file Labeled immuoblots for Figure 7.pdf › Figure 7-source data 4/Labeled immuoblots for Figure 7.pdf]
